# Supplementary material for: Chromatin accessibility dynamics and single cell RNA-Seq reveal new regulators of regeneration in neural progenitors
Source: eLife. 2020 Apr 27;9:e52648. doi: 10.7554/eLife.52648 (PMC7250574; doi:10.7554/eLife.52648)
Supplement: Figure 5—source data 1. [file elife-52648-fig5-data1.csv]

	Condition	Timepoint	Replicate	Clutch	Cells	Area_pixel	CPPixel	ppmicron	Area_micron	CPMicron	CPMm
1	uninjured	72hpa	1	20720	13	10566.708	0.001230279	1.54	4455.518637	0.00291773	2.917729912
2	uninjured	72hpa	2	20720	14	9898.202	0.001414398	1.54	4173.638894	0.003354387	3.354386989
3	uninjured	72hpa	3	20720	13	11149.927	0.001165927	1.54	4701.436583	0.002765112	2.765112274
4	uninjured	72hpa	4	20720	18	12215.739	0.001473509	1.54	5150.842891	0.003494574	3.494573681
5	uninjured	72hpa	5	20720	10	11060.069	0.000904153	1.54	4663.547394	0.00214429	2.14429042
6	uninjured	72hpa	6	20720	20	11323.703	0.001766207	1.54	4774.710322	0.004188736	4.188735787
7	uninjured	72hpa	7	20720	10	9007.202	0.001110223	1.54	3797.943161	0.002633004	2.633004123
8	uninjured	24hpa	1	20720	3	7825.86	0.000383344	1.54	3299.822904	0.00090914	0.909139698
9	uninjured	24hpa	2	20720	6	8930.271	0.000671872	1.54	3765.504723	0.001593412	1.593411891
10	uninjured	24hpa	3	20720	5	8566.617	0.000583661	1.54	3612.167735	0.00138421	1.38421036
11	uninjured	24hpa	4	20720	3	8343.584	0.000359558	1.54	3518.124473	0.000852727	0.852727077
