# Supplementary material for: Chromatin accessibility dynamics and single cell RNA-Seq reveal new regulators of regeneration in neural progenitors
Source: eLife. 2020 Apr 27;9:e52648. doi: 10.7554/eLife.52648 (PMC7250574; doi:10.7554/eLife.52648)
Supplement: Figure 7—source data 1. [file elife-52648-fig7-data1.csv]

	SampleID	Sample	Replicate	Clutch	Timepoint	Measurement	MeasureType	PhenotypeSum	PhenotypeNotocord	PhenotypeNeuron	PhenotypeMorphology	Stain	Other.Notes	SampleFull
1	tracer	control	1	22120	72hpa	430.035	Spinal Cord	0	0	0	0	0	vivostudy_final dose	control.72hpa.1.22120
2	tracer	control	1	22120	72hpa	661.819	Tail	0	0	0	0	0	vivostudy_final dose	control.72hpa.1.22120
3	tracer	control	2	22120	72hpa	568.472	Spinal Cord	0	0	0	0	0	vivostudy_final dose	control.72hpa.2.22120
4	tracer	control	2	22120	72hpa	721.326	Tail	0	0	0	0	0	vivostudy_final dose	control.72hpa.2.22120
5	tracer	control	3	22120	72hpa	544.828	Spinal Cord	0	0	0	0	0	vivostudy_final dose	control.72hpa.3.22120
6	tracer	control	3	22120	72hpa	653.744	Tail	0	0	0	0	0	vivostudy_final dose	control.72hpa.3.22120
7	tracer	control	4	22120	72hpa	545.637	Spinal Cord	0	0	0	0	0	vivostudy_final dose	control.72hpa.4.22120
8	tracer	control	4	22120	72hpa	674.612	Tail	0	0	0	0	0	vivostudy_final dose	control.72hpa.4.22120
9	tracer	control	5	22120	72hpa	557.224	Spinal Cord	0	0	0	0	0	vivostudy_final dose	control.72hpa.5.22120
10	tracer	control	5	22120	72hpa	697.773	Tail	0	0	0	0	0	vivostudy_final dose	control.72hpa.5.22120
11	tracer	control	6	22120	72hpa	548.49	Spinal Cord	0	0	0	0	0	vivostudy_final dose	control.72hpa.6.22120
12	tracer	control	6	22120	72hpa	682.173	Tail	0	0	0	0	0	vivostudy_final dose	control.72hpa.6.22120
13	tracer	control	7	22120	72hpa	466.27	Spinal Cord	0	0	0	0	0	vivostudy_final dose	control.72hpa.7.22120
14	tracer	control	7	22120	72hpa	681.355	Tail	0	0	0	0	0	vivostudy_final dose	control.72hpa.7.22120
15	tracer	control	8	22120	72hpa	655.79	Spinal Cord	0	0	0	0	0	vivostudy_final dose	control.72hpa.8.22120
16	tracer	control	8	22120	72hpa	783.063	Tail	0	0	0	0	0	vivostudy_final dose	control.72hpa.8.22120
17	tracer	control	9	22120	72hpa	553.292	Spinal Cord	0	0	0	0	0	vivostudy_final dose	control.72hpa.9.22120
18	tracer	control	9	22120	72hpa	655.166	Tail	0	0	0	0	0	vivostudy_final dose	control.72hpa.9.22120
19	tracer	control	10	22120	72hpa	539.89	Spinal Cord	0	0	0	0	0	vivostudy_final dose	control.72hpa.10.22120
20	tracer	control	10	22120	72hpa	757.245	Tail	0	0	0	0	0	vivostudy_final dose	control.72hpa.10.22120
21	tracer	control	11	22120	72hpa	458.853	Spinal Cord	0	0	0	0	0	vivostudy_final dose	control.72hpa.11.22120
22	tracer	control	11	22120	72hpa	746.264	Tail	0	0	0	0	0	vivostudy_final dose	control.72hpa.11.22120
23	tracer	control	12	22120	72hpa	489.704	Spinal Cord	0	0	0	0	0	vivostudy_final dose	control.72hpa.12.22120
24	tracer	control	12	22120	72hpa	647.343	Tail	0	0	0	0	0	vivostudy_final dose	control.72hpa.12.22120
25	pbx3_VMO	pbx3MO	1	22120	72hpa	399.918	Spinal Cord	0	0	0	0	0	vivostudy_final dose	pbx3MO.72hpa.1.22120
26	pbx3_VMO	pbx3MO	1	22120	72hpa	481.521	Tail	0	0	0	0	0	vivostudy_final dose	pbx3MO.72hpa.1.22120
27	pbx3_VMO	pbx3MO	2	22120	72hpa	429.561	Spinal Cord	0	0	0	0	0	vivostudy_final dose	pbx3MO.72hpa.2.22120
28	pbx3_VMO	pbx3MO	2	22120	72hpa	534.855	Tail	0	0	0	0	0	vivostudy_final dose	pbx3MO.72hpa.2.22120
29	pbx3_VMO	pbx3MO	3	22120	72hpa	420.539	Spinal Cord	0	0	0	0	0	vivostudy_final dose	pbx3MO.72hpa.3.22120
30	pbx3_VMO	pbx3MO	3	22120	72hpa	523.167	Tail	0	0	0	0	0	vivostudy_final dose	pbx3MO.72hpa.3.22120
31	pbx3_VMO	pbx3MO	4	22120	72hpa	453.116	Spinal Cord	0	0	0	0	0	vivostudy_final dose	pbx3MO.72hpa.4.22120
32	pbx3_VMO	pbx3MO	4	22120	72hpa	528.037	Tail	0	0	0	0	0	vivostudy_final dose	pbx3MO.72hpa.4.22120
33	pbx3_VMO	pbx3MO	5	22120	72hpa	250.459	Spinal Cord	0	0	0	0	0	vivostudy_final dose	pbx3MO.72hpa.5.22120
34	pbx3_VMO	pbx3MO	5	22120	72hpa	396.394	Tail	0	0	0	0	0	vivostudy_final dose	pbx3MO.72hpa.5.22120
35	pbx3_VMO	pbx3MO	6	22120	72hpa	406.414	Spinal Cord	0	0	0	0	0	vivostudy_final dose	pbx3MO.72hpa.6.22120
36	pbx3_VMO	pbx3MO	6	22120	72hpa	502.837	Tail	0	0	0	0	0	vivostudy_final dose	pbx3MO.72hpa.6.22120
37	pbx3_VMO	pbx3MO	7	22120	72hpa	211.773	Spinal Cord	0	0	0	0	0	vivostudy_final dose	pbx3MO.72hpa.7.22120
38	pbx3_VMO	pbx3MO	7	22120	72hpa	348.006	Tail	0	0	0	0	0	vivostudy_final dose	pbx3MO.72hpa.7.22120
39	pbx3_VMO	pbx3MO	8	22120	72hpa	403.704	Spinal Cord	0	0	0	0	0	vivostudy_final dose	pbx3MO.72hpa.8.22120
40	pbx3_VMO	pbx3MO	8	22120	72hpa	501.286	Tail	0	0	0	0	0	vivostudy_final dose	pbx3MO.72hpa.8.22120
41	pbx3_VMO	pbx3MO	9	22120	72hpa	409.272	Spinal Cord	0	0	0	0	0	vivostudy_final dose	pbx3MO.72hpa.9.22120
42	pbx3_VMO	pbx3MO	9	22120	72hpa	484.114	Tail	0	0	0	0	0	vivostudy_final dose	pbx3MO.72hpa.9.22120
43	pbx3_VMO	pbx3MO	10	22120	72hpa	404.556	Spinal Cord	0	0	0	0	0	vivostudy_final dose	pbx3MO.72hpa.10.22120
44	pbx3_VMO	pbx3MO	10	22120	72hpa	528.275	Tail	0	0	0	0	0	vivostudy_final dose	pbx3MO.72hpa.10.22120
45	pbx3_VMO	pbx3MO	11	22120	72hpa	401.86	Spinal Cord	0	0	0	0	0	vivostudy_final dose	pbx3MO.72hpa.11.22120
46	pbx3_VMO	pbx3MO	11	22120	72hpa	579.1	Tail	0	0	0	0	0	vivostudy_final dose	pbx3MO.72hpa.11.22120
47	pbx3_VMO	pbx3MO	12	22120	72hpa	327.569	Spinal Cord	0	0	0	0	0	vivostudy_final dose	pbx3MO.72hpa.12.22120
48	pbx3_VMO	pbx3MO	12	22120	72hpa	548.51	Tail	0	0	0	0	0	vivostudy_final dose	pbx3MO.72hpa.12.22120
49	meis1_VMO	meis1MO	1	22120	72hpa	303.827	Spinal Cord	0	0	0	0	0	vivostudy_final dose	meis1MO.72hpa.1.22120
50	meis1_VMO	meis1MO	1	22120	72hpa	416.751	Tail	0	0	0	0	0	vivostudy_final dose	meis1MO.72hpa.1.22120
51	meis1_VMO	meis1MO	2	22120	72hpa	433.969	Spinal Cord	0	0	0	0	0	vivostudy_final dose	meis1MO.72hpa.2.22120
52	meis1_VMO	meis1MO	2	22120	72hpa	517.446	Tail	0	0	0	0	0	vivostudy_final dose	meis1MO.72hpa.2.22120
53	meis1_VMO	meis1MO	3	22120	72hpa	489.537	Spinal Cord	0	0	0	0	0	vivostudy_final dose	meis1MO.72hpa.3.22120
54	meis1_VMO	meis1MO	3	22120	72hpa	655.452	Tail	0	0	0	0	0	vivostudy_final dose	meis1MO.72hpa.3.22120
55	meis1_VMO	meis1MO	4	22120	72hpa	243.394	Spinal Cord	0	0	0	0	0	vivostudy_final dose	meis1MO.72hpa.4.22120
56	meis1_VMO	meis1MO	4	22120	72hpa	351.939	Tail	0	0	0	0	0	vivostudy_final dose	meis1MO.72hpa.4.22120
57	meis1_VMO	meis1MO	5	22120	72hpa	282.475	Spinal Cord	0	0	0	0	0	vivostudy_final dose	meis1MO.72hpa.5.22120
58	meis1_VMO	meis1MO	5	22120	72hpa	394.083	Tail	0	0	0	0	0	vivostudy_final dose	meis1MO.72hpa.5.22120
59	meis1_VMO	meis1MO	6	22120	72hpa	353.702	Spinal Cord	0	0	0	0	0	vivostudy_final dose	meis1MO.72hpa.6.22120
60	meis1_VMO	meis1MO	6	22120	72hpa	442.733	Tail	0	0	0	0	0	vivostudy_final dose	meis1MO.72hpa.6.22120
61	meis1_VMO	meis1MO	7	22120	72hpa	357.025	Spinal Cord	0	0	0	0	0	vivostudy_final dose	meis1MO.72hpa.7.22120
62	meis1_VMO	meis1MO	7	22120	72hpa	456.636	Tail	0	0	0	0	0	vivostudy_final dose	meis1MO.72hpa.7.22120
63	meis1_VMO	meis1MO	8	22120	72hpa	332.795	Spinal Cord	0	0	0	0	0	vivostudy_final dose	meis1MO.72hpa.8.22120
64	meis1_VMO	meis1MO	8	22120	72hpa	477.351	Tail	0	0	0	0	0	vivostudy_final dose	meis1MO.72hpa.8.22120
