# Supplementary material for: Chromatin accessibility dynamics and single cell RNA-Seq reveal new regulators of regeneration in neural progenitors
Source: eLife. 2020 Apr 27;9:e52648. doi: 10.7554/eLife.52648 (PMC7250574; doi:10.7554/eLife.52648)
Supplement: Supplementary file 1. — (a) ATAC-Seq sample preparation details. (b) ATAC-Seq quality control metrics. (c) Pax6 vs. all Tissue gene ontology results (more accessible in pax6 libraries). (d) Pax6 vs. all Tissue gene ontology results (more accessible in all-tissue libraries). (e) 6hpa gene ontology results. (f) 24hpa gene ontology results. (g) 72hpa gene ontology(h) 6hpa ReviGO results. (i) 24hpa ReviGo results. (j) 72hpa ReviGo results. Key Resource Table. Reagents table. [file elife-52648-supp1.xlsx]

## Sheet: Supp Table 1a
ATAC-Seq Sample Preparation Details
SampleNames	Genotype	TimePoint	Tails	CellCount	IndexPrimer	ExtraCycles	BioAnalyzerConc	QubitConc	PrepTime
WW1	Whole-Tail	Whole-Tail	5	766	n701	8	6.3ng/uL	NAng/uL	172min
WW2	Whole-Tail	Whole-Tail	5	2231	n701	6	3.3ng/uL	NAng/uL	165min
WW3	Whole-Tail	Whole-Tail	5	4827	n701	7	5.3ng/uL	NAng/uL	165min
WW11	Whole-Tail	Whole-Tail	NA	NA	n711	7	5.7ng/uL	NAng/uL	NAmin
PW1	pax6	Whole-Tail	20	1214	n702	7	5.3ng/uL	NAng/uL	159min
PW2	pax6	Whole-Tail	20	1715	n702	9	5.4ng/uL	NAng/uL	143min
PW3	pax6	Whole-Tail	20	2128	n702	6	5.2ng/uL	NAng/uL	136min
W01	Whole-Tail	0hpa	5	1215	n703	6	3.6ng/uL	NAng/uL	172min
W02	Whole-Tail	0hpa	5	2054	n703	8	5.3ng/uL	68ng/uL	165min
W03	Whole-Tail	0hpa	5	2053	n703	7	3.9ng/uL	NAng/uL	165min
P01	pax6	0hpa	20	1366	n704	6	4.3ng/uL	NAng/uL	185min
P02	pax6	0hpa	20	1318	n704	6	8.2ng/uL	NAng/uL	143min
P03	pax6	0hpa	20	1425	n704	6	4.6ng/uL	NAng/uL	134min
W61	Whole-Tail	6hpa	5	1803	n705	6	4.5ng/uL	25.3ng/uL	95min
W61	Whole-Tail	6hpa	5	1695	n705	6	4.55ng/uL	NAng/uL	95min
W63	Whole-Tail	6hpa	5	1985	n705	6	4.7ng/uL	NAng/uL	95min
P61	pax6	6hpa	20	2083	n706	6	4ng/uL	NAng/uL	109min
P62	pax6	6hpa	20	1624	n706	7	5.9ng/uL	NAng/uL	105min
P63	pax6	6hpa	20	1819	n706	8	4.4ng/uL	NAng/uL	99min
W241	Whole-Tail	24hpa	5	1803	n707	6	5.3ng/uL	61.4ng/uL	98min
W242	Whole-Tail	24hpa	5	1695	n707	6	4.3ng/uL	NAng/uL	98min
W243	Whole-Tail	24hpa	6	1985	n707	6	3.5ng/uL	NAng/uL	98min
P241	pax6	24hpa	20	1577	n708	7	4.7ng/uL	13.8ng/uL	112min
P242	pax6	24hpa	21	1120	n708	7	5.3ng/uL	13.8ng/uL	108min
P243	pax6	24hpa	23	1784	n708	7	57.5ng/uL	8.56ng/uL	103min
W721	Whole-Tail	72hpa	5	5806	n709	9	163ng/uL	14.7ng/uL	93min
W722	Whole-Tail	72hpa	5	4728	n709	9	117ng/uL	13.4ng/uL	93min
W723	Whole-Tail	72hpa	6	4957	n709	9	12.7ng/uL	11.6ng/uL	93min
W7212	Whole-Tail	72hpa	NA	NA	n712	7	4.9ng/uL	14.2ng/uL	NAmin
P721	pax6	72hpa	19	1799	n710	7	3.8ng/uL	17.3ng/uL	109min
P722	pax6	72hpa	20	2817	n710	6	4.3ng/uL	22.8ng/uL	103min
P723	pax6	72hpa	20	307	n710	10	3.8ng/uL	8.24ng/uL	97min

## Sheet: Supp Table 1b
ATAC-Seq Library Quality Control Metrics
	Sample	Peaks	Total Reads	Total Reads Aligned	Pct Reads Aligned
1	P02_pax6_0hpa	26610	46267854	42345923	91.5234
2	P03_pax6_0hpa	88773	181208446	166092513	91.6583
3	P241_pax6_24hpa	59968	95936770	87842652	91.5631
4	P242_pax6_24hpa	74814	127070942	116991798	92.0681
5	P243_pax6_24hpa	50431	92887190	85577043	92.1301
6	P61_pax6_6hpa	46599	93936728	86673754	92.2682
7	P62_pax6_6hpa	41063	86501194	79573349	91.991
8	P63_pax6_6hpa	34812	79401418	71466771	90.0069
9	P721_pax6_72hpa	48413	89983228	81901291	91.0184
10	P722_pax6_72hpa	56708	103174626	95768371	92.8216
11	P723_pax6_72hpa	55825	87248456	72101222	82.639
12	PW1_pax6_Whole-Tail	74326	152917716	137905086	90.1825
13	PW2_pax6_Whole-Tail	29557	78237670	69549140	88.8947
14	W01_WT_0hpa	42951	80793032	74841994	92.6342
15	W03_WT_0hpa	83340	126935750	116317254	91.6347
16	W242_WT_24hpa	52326	89218132	81627092	91.4916
17	W243_WT_24hpa	61131	98920378	89727194	90.7065
18	W61_WT_6hpa	51415	87596658	80271562	91.6377
19	W62_WT_6hpa	68030	115933284	106484978	91.8502
20	W63_WT_6hpa	59710	97166400	89245486	91.8481
21	W721_WT_72hpa	75790	101467948	93516316	92.1634
22	W7212_WT_72hpa	57596	80036432	74162204	92.6606
23	W722_WT_72hpa	62584	98373526	91228691	92.737
24	W723_WT_72hpa	66483	105979372	98006433	92.4769
25	WW1_WT_Whole-Tail	20826	52075014	48470552	93.0783
26	WW11_WT_Whole-Tail	61434	78065026	71292241	91.3242
27	WW2_WT_Whole-Tail	46700	69554908	63960753	91.9572
28	WW3_WT_Whole-Tail	67345	104487792	95820335	91.7048

## Sheet: Supp Table 1c
PAXvall gene ontology results
	p_value	term_id	term_name	intersection	logp
1	8.52337e-21	GO:0007399	nervous system development	gfra4,vax2,dctn1,atoh8,prom1,slit2,sfrp2,ednra,pcdh18,egf,ank2,ppp3ca,unc5c,snca,ptprs,rest,anxa3,ugcg,ncan,musk,klf4,c9orf72,ptprd,dmrt3,rpgrip1,inpp5j,lif,wdr36,fbxl17,xbp1,sema6a,otp,enc1,foxd1,mef2c,nr2f1,plk2,isl1,hcn1,slc1a3,gdnf,rax,tcf4,skor2,lsamp,dscam,runx1,olig1,ncam2,epha6,robo1,rtn4rl1,nr0b1,plxna2,pou3f1,sypl2,srgap2,rap1a,anks1a,notch1,hpcal4,auts2,col4a1,slitrk1,pcdh17,col2a1,ufm…	20.0694
2	3.61535e-19	GO:0009653	anatomical structure morphogenesis	gfra4,vax2,fgfr3,atoh8,prom1,slit2,fat1,hpgd,npy5r,rbm46,sfrp2,ednra,spry1,egf,ank2,ppp3ca,unc5c,enam,ptprs,anxa3,fras1,klf4,c9orf72,ptprd,dmrt2,dmrt3,pcsk5,myh6,rpgrip1,lif,wdr36,myo18b,stx2,xbp1,fbn2,sema6a,foxd1,mef2c,plk2,isl1,hcn1,ghr,slc1a3,gdnf,adamts12,tcf4,smad2,skor2,gja5,dscam,ets2,runx1,adamts1,epha6,robo1,plxna2,sox13,srgap2,rap1a,tnnt2,notch1,tbx2,ap2b1,auts2,col4a1,gpc6,slitrk1,pcd…	18.4419
3	3.3739e-18	GO:0030182	neuron differentiation	gfra4,vax2,prom1,slit2,sfrp2,ppp3ca,unc5c,ptprs,rest,ugcg,klf4,c9orf72,ptprd,dmrt3,rpgrip1,inpp5j,lif,wdr36,xbp1,sema6a,otp,enc1,foxd1,mef2c,nr2f1,plk2,isl1,hcn1,slc1a3,gdnf,tcf4,skor2,dscam,runx1,olig1,ncam2,epha6,robo1,rtn4rl1,plxna2,srgap2,rap1a,anks1a,notch1,auts2,slitrk1,tenm4,tsku,wnt11,csf1r,drd1,cntn1,reln,sema3a,hmg20a,lingo1,dvl2,ephb4,adm,lrrc4c,pax6,siah1,lpar3,flrt1,sall1,cdh11,negr1…	17.4719
4	1.33868e-17	GO:0007275	multicellular organism development	gfra4,vax2,dctn1,fgfr3,maea,atoh8,ldb2,prom1,evc,slit2,sgcz,frg1,fat1,sorbs2,hpgd,npy5r,rbm46,dchs2,sfrp2,ednra,pcdh18,spry1,kiaa1109,egf,ank2,tet2,ppp3ca,unc5c,snca,enam,ptprs,rest,anxa3,fras1,ugcg,ncan,musk,klf4,dmrta1,c9orf72,ptprd,dmrt2,dmrt3,pcsk5,gadd45g,myh6,rpgrip1,inpp5j,lif,apc,camk4,wdr36,fbxl17,myo18b,mn1,patz1,stx2,xbp1,fbn2,hsd17b4,sema6a,otp,enc1,foxd1,cartpt,mef2c,nr2f1,plk2,isl1,…	16.8733
5	1.42662e-17	GO:0048731	system development	gfra4,vax2,dctn1,fgfr3,maea,atoh8,ldb2,prom1,evc,slit2,sgcz,frg1,fat1,sorbs2,hpgd,npy5r,dchs2,sfrp2,ednra,pcdh18,spry1,egf,ank2,tet2,ppp3ca,unc5c,snca,enam,ptprs,rest,anxa3,fras1,ugcg,ncan,musk,klf4,dmrta1,c9orf72,ptprd,dmrt2,dmrt3,pcsk5,myh6,rpgrip1,inpp5j,lif,camk4,wdr36,fbxl17,myo18b,patz1,stx2,xbp1,fbn2,hsd17b4,sema6a,otp,enc1,foxd1,cartpt,mef2c,nr2f1,plk2,isl1,hcn1,ghr,prkaa1,slc1a3,gdnf,prl…	16.8457
6	1.3913e-16	GO:0048699	generation of neurons	gfra4,vax2,prom1,slit2,sfrp2,ppp3ca,unc5c,ptprs,rest,ugcg,klf4,c9orf72,ptprd,dmrt3,rpgrip1,inpp5j,lif,wdr36,xbp1,sema6a,otp,enc1,foxd1,mef2c,nr2f1,plk2,isl1,hcn1,slc1a3,gdnf,tcf4,skor2,dscam,runx1,olig1,ncam2,epha6,robo1,rtn4rl1,plxna2,srgap2,rap1a,anks1a,notch1,auts2,slitrk1,tenm4,tsku,wnt11,csf1r,drd1,cntn1,reln,sema3a,hmg20a,lingo1,dvl2,ephb4,adm,lrrc4c,pax6,siah1,il34,lpar3,flrt1,sall1,cdh11,…	15.8566
7	1.61103e-16	GO:0022008	neurogenesis	gfra4,vax2,prom1,slit2,sfrp2,ppp3ca,unc5c,ptprs,rest,ugcg,klf4,c9orf72,ptprd,dmrt3,rpgrip1,inpp5j,lif,wdr36,xbp1,sema6a,otp,enc1,foxd1,mef2c,nr2f1,plk2,isl1,hcn1,slc1a3,gdnf,tcf4,skor2,dscam,runx1,olig1,ncam2,epha6,robo1,rtn4rl1,plxna2,pou3f1,srgap2,rap1a,anks1a,notch1,auts2,slitrk1,tenm4,tsku,wnt11,csf1r,drd1,cntn1,reln,sema3a,hmg20a,lingo1,dvl2,ephb4,adm,lrrc4c,pax6,siah1,il34,lpar3,flrt1,sall1…	15.7929
8	6.97289e-16	GO:0048856	anatomical structure development	gfra4,vax2,dctn1,fgfr3,maea,atoh8,ldb2,prom1,evc,slit2,sgcz,frg1,fat1,sorbs2,hpgd,npy5r,rbm46,dchs2,sfrp2,ednra,pcdh18,spry1,kiaa1109,egf,ank2,tet2,ppp3ca,unc5c,snca,enam,ptprs,rest,anxa3,fras1,ugcg,ncan,musk,klf4,dmrta1,c9orf72,ptprd,dmrt2,dmrt3,pcsk5,gadd45g,myh6,rpgrip1,inpp5j,lif,apc,camk4,wdr36,fbxl17,myo18b,mn1,patz1,stx2,xbp1,fbn2,hsd17b4,sema6a,otp,enc1,foxd1,cartpt,marveld2,mef2c,nr2f1,p…	15.1566
9	2.4635e-15	GO:0009887	animal organ morphogenesis	vax2,fgfr3,prom1,slit2,fat1,npy5r,sfrp2,spry1,enam,fras1,dmrt3,myh6,rpgrip1,lif,stx2,xbp1,fbn2,sema6a,foxd1,mef2c,isl1,hcn1,ghr,gdnf,smad2,gja5,dscam,adamts1,robo1,tnnt2,notch1,tbx2,ap2b1,gpc6,col2a1,vdr,hoxc13,cdx2,fgf9,tsku,wnt11,csf1r,msx2,sema3a,dvl2,ephb4,adm,alx4,fjx1,pax6,cyr61,sall1,foxf1,ror1,pappa2,s1pr1,prickle2,psmd6,tgfb2,ush2a,prox1,bmp2,hey2,bcl2l11,foxo3,bmp5,wwtr1,osr1,wnt9a,naca…	14.6084
10	6.26764e-15	GO:0007389	pattern specification process	vax2,sfrp2,spry1,dmrt2,dmrt3,pcsk5,apc,foxd1,mef2c,isl1,gdnf,rax,smad2,ets2,robo1,plxna2,notch1,tbx2,pcdh8,hoxc13,cdx2,msx2,reln,sema3a,pcsk6,dvl2,alx4,pax6,rpgrip1l,foxf1,sema3f,fezf2,disp1,bmp2,hey2,bmp5,osr1,xrcc2,nrp1,zeb1,armc4,dnah5,gli3,rttn,eya1,hey1,fgfr2,ski,eng,ar,ttc8,lfng,satb2,acvr2a,zeb2,hoxb1,hoxb2,hoxb4,snai1,mafb,ndrg4,daam2,gata4,pofut1,wnt7b,barx1,gli2,emx2,wdr19,ccdc40,sox18,…	14.2029
11	1.4363e-14	GO:0009888	tissue development	vax2,fgfr3,atoh8,ldb2,prom1,evc,slit2,sgcz,fat1,sorbs2,sfrp2,ednra,spry1,kiaa1109,egf,ppp3ca,unc5c,enam,ptprs,fras1,ugcg,klf4,dmrt2,myh6,lif,fbxl17,myo18b,stx2,xbp1,fbn2,hsd17b4,sema6a,foxd1,marveld2,mef2c,isl1,ghr,prkaa1,gdnf,adamts12,mex3c,smad2,gja5,ets2,runx1,robo1,nr0b1,plxna2,pou3f1,rap1a,tnnt2,notch1,tbx2,ap2b1,col4a1,gpc6,pcdh8,col2a1,vdr,hoxc13,cdx2,amer2,fgf9,pdgfd,tenm4,wnt11,csf1r,pit…	13.8428
12	2.48845e-14	GO:0007507	heart development	slit2,sgcz,sorbs2,npy5r,sfrp2,ednra,spry1,ank2,rest,pcsk5,myh6,myo18b,mef2c,isl1,mbd2,smad2,gja5,adamts1,robo1,sypl2,tnnt2,notch1,tbx2,ap2b1,col2a1,fgf9,tenm4,wnt11,msx2,dvl2,ephb4,adm,cyr61,rpgrip1l,sall1,foxf1,s1pr1,adamts9,tgfb2,prox1,bmp2,hey2,rps6ka2,bves,bmp5,fgf12,tfdp2,osr1,naca,nrp1,fzd1,dnah5,twist1,hdac9,gli3,eya1,hey1,has2,fgfr2,eng,tsc1,actc1,crip1,sall4,snai1,ndrg4,myocd,gata4,rxra,…	13.6041
13	3.17551e-14	GO:0048513	animal organ development	vax2,dctn1,fgfr3,maea,ldb2,prom1,evc,slit2,sgcz,frg1,fat1,sorbs2,hpgd,npy5r,dchs2,sfrp2,ednra,pcdh18,spry1,egf,ank2,tet2,ppp3ca,unc5c,enam,ptprs,rest,anxa3,fras1,ugcg,klf4,dmrta1,dmrt3,pcsk5,myh6,rpgrip1,lif,camk4,fbxl17,myo18b,patz1,stx2,xbp1,fbn2,hsd17b4,sema6a,otp,foxd1,cartpt,mef2c,isl1,hcn1,ghr,prkaa1,gdnf,prlr,adamts12,rax,wdr7,mbd2,mex3c,dym,smad2,skor2,ildr2,gja5,dscam,runx1,adamts1,robo1…	13.4982
14	4.25746e-14	GO:0032502	developmental process	gfra4,vax2,dctn1,fgfr3,nkx1-1,maea,ctbp1,atoh8,ldb2,prom1,evc,slit2,sgcz,frg1,fat1,sorbs2,hpgd,npy5r,rbm46,dchs2,sfrp2,ednra,pcdh18,spry1,kiaa1109,egf,ank2,tet2,tacr3,ppp3ca,unc5c,snca,enam,ptprs,rest,lpl,anxa3,fras1,ugcg,ncan,musk,klf4,dmrta1,c9orf72,ptprd,dmrt2,dmrt3,pcsk5,gadd45g,myh6,rpgrip1,inpp5j,lif,apc,camk4,wdr36,fbxl17,myo18b,mn1,patz1,stx2,xbp1,fbn2,hsd17b4,sema6a,otp,enc1,foxd1,cartpt…	13.3708
15	6.36713e-14	GO:0048666	neuron development	gfra4,vax2,slit2,sfrp2,ppp3ca,unc5c,ptprs,ugcg,klf4,c9orf72,ptprd,rpgrip1,inpp5j,lif,wdr36,xbp1,sema6a,enc1,foxd1,mef2c,nr2f1,plk2,isl1,hcn1,slc1a3,gdnf,skor2,dscam,runx1,ncam2,epha6,robo1,rtn4rl1,plxna2,srgap2,rap1a,anks1a,notch1,auts2,slitrk1,tenm4,tsku,csf1r,drd1,cntn1,reln,sema3a,lingo1,dvl2,ephb4,adm,lrrc4c,pax6,siah1,lpar3,flrt1,cdh11,negr1,sema3f,nckipsd,cpne5,fezf2,enah,tgfb2,btbd3,arid1b…	13.1961
16	1.19436e-13	GO:0048468	cell development	gfra4,vax2,maea,slit2,sgcz,fat1,sorbs2,sfrp2,ednra,spry1,ank2,ppp3ca,unc5c,ptprs,rest,ugcg,klf4,c9orf72,ptprd,myh6,rpgrip1,inpp5j,lif,wdr36,myo18b,xbp1,hsd17b4,sema6a,otp,enc1,foxd1,marveld2,mef2c,nr2f1,plk2,isl1,hcn1,slc1a3,gdnf,tcf4,mex3c,skor2,dscam,runx1,ncam2,epha6,robo1,rtn4rl1,plxna2,pou3f1,sypl2,srgap2,rap1a,tnnt2,anks1a,notch1,auts2,msi2,slitrk1,tenm4,tsku,csf1r,drd1,msx2,csrp2,cntn1,rel…	12.9229
17	6.05091e-13	GO:0007267	cell-cell signaling	vax2,rab11fip5,fgfr3,fgfbp2,sorcs2,fat1,slc25a4,npy5r,sfrp2,egf,ank2,ppp3ca,snca,ptprs,rest,slc24a2,klf4,ptprd,pcsk5,cntnap4,myh6,lif,slc8b1,apc,stx2,foxd1,cartpt,mef2c,pcsk1,lnpep,htr1a,plk2,isl1,prkaa1,slc1a3,gdnf,cplx4,mbd2,smad2,igsf11,ildr2,gja5,runx1,htr1f,ptpru,rspo1,kiss1,rap1a,slc16a1,itpr3,notch1,rims3,ap2b1,rph3al,gpc6,pcdh17,pcdh8,htr2a,amer2,fgf9,tsku,wnt11,nmur2,gabra1,cxcl14,drd1,p…	12.2182
18	2.26724e-12	GO:0045597	positive regulation of cell differentiation	atoh8,prom1,slit2,sfrp2,rest,lpl,ptprd,lif,xbp1,fbn2,sema6a,otp,enc1,mef2c,isl1,ghr,gdnf,tcf4,smad2,dscam,runx1,robo1,plxna2,rap1a,notch1,slitrk1,htr2a,vdr,cdx2,tenm4,msx2,cntn1,reln,sema3a,znf703,egr3,olfm2,dvl2,adm,pax6,il34,cyr61,lpar3,cdh5,negr1,nckipsd,cpne5,adamts9,fezf2,tgfb2,prox1,bmp2,oprm1,foxo3,bmp5,rims1,nlgn1,bcl6,wwtr1,apob,ptk2b,wnt9a,xrcc2,nrp1,zeb1,fzd1,twist1,bcl2,gli3,bmp6,cdh2…	11.6445
19	3.36941e-12	GO:0045664	regulation of neuron differentiation	slit2,sfrp2,ppp3ca,ptprs,rest,klf4,ptprd,inpp5j,wdr36,sema6a,enc1,mef2c,nr2f1,plk2,isl1,tcf4,skor2,dscam,robo1,rtn4rl1,plxna2,rap1a,notch1,slitrk1,cntn1,reln,sema3a,hmg20a,lingo1,dvl2,lrrc4c,pax6,lpar3,negr1,sema3f,nckipsd,cpne5,fezf2,prox1,bmp2,hey2,foxo3,bmp5,rims1,nlgn1,bcl6,ptk2b,nrp1,zeb1,fzd1,bcl2,gli3,bmp6,cdh2,lyn,eya1,hey1,gdf6,asap1,zfyve27,cxcl12,zswim8,shank1,tsc1,l1cam,cdk5rap2,fgf13…	11.4724
20	3.79723e-12	GO:0048869	cellular developmental process	gfra4,vax2,fgfr3,nkx1-1,maea,ctbp1,atoh8,prom1,slit2,sgcz,fat1,sorbs2,rbm46,sfrp2,ednra,spry1,kiaa1109,ank2,tet2,ppp3ca,unc5c,enam,ptprs,rest,lpl,ugcg,musk,klf4,c9orf72,ptprd,dmrt3,gadd45g,myh6,rpgrip1,inpp5j,lif,apc,camk4,wdr36,fbxl17,myo18b,patz1,stx2,xbp1,fbn2,hsd17b4,sema6a,otp,enc1,foxd1,cartpt,marveld2,mef2c,nr2f1,plk2,isl1,hcn1,ghr,slc1a3,gdnf,adamts12,wdr7,tcf4,mex3c,smad2,skor2,ildr2,dsc…	11.4205
21	3.99112e-12	GO:0048522	positive regulation of cellular process	tex261,dctn1,fgfr3,nkx1-1,ctbp1,atoh8,msantd1,ldb2,prom1,clnk,evc,slit2,cep135,cdkn2aip,hpgd,npy5r,sfrp2,nr3c2,egf,alpk1,mad2l1,tet2,tacr3,ppp3ca,h2afz,tspan5,unc5c,snca,rest,lpl,anxa3,dgkq,musk,slc24a2,klf4,c9orf72,ptprd,dmrt2,cdc14b,gadd45g,lif,apc,camk4,patz1,clip1,xbp1,fbn2,sema6a,otp,enc1,foxd1,cartpt,mef2c,nr2f1,cd180,htr1a,plk2,isl1,ghr,prkaa1,slc1a3,gdnf,prlr,rxfp3,lman1,rax,tcf4,mbd2,sma…	11.3989
22	7.29049e-12	GO:0031175	neuron projection development	gfra4,vax2,slit2,sfrp2,ppp3ca,unc5c,ptprs,klf4,c9orf72,ptprd,inpp5j,wdr36,sema6a,enc1,foxd1,mef2c,nr2f1,plk2,isl1,gdnf,skor2,dscam,ncam2,epha6,robo1,rtn4rl1,plxna2,srgap2,rap1a,notch1,auts2,slitrk1,tsku,csf1r,cntn1,reln,sema3a,lingo1,dvl2,ephb4,adm,lrrc4c,pax6,siah1,lpar3,flrt1,cdh11,negr1,sema3f,nckipsd,cpne5,fezf2,enah,btbd3,arid1b,bmp5,rims1,nlgn1,dock10,ptk2b,nrp1,fzd1,nrn1,bcl2,gli3,cdh2,lyn…	11.1372
23	8.79474e-12	GO:0045595	regulation of cell differentiation	atoh8,prom1,slit2,sfrp2,kiaa1109,ppp3ca,ptprs,rest,lpl,klf4,ptprd,inpp5j,lif,apc,camk4,wdr36,xbp1,fbn2,sema6a,otp,enc1,cartpt,mef2c,nr2f1,plk2,isl1,ghr,gdnf,adamts12,tcf4,mex3c,smad2,skor2,dscam,runx1,robo1,rtn4rl1,plxna2,sox13,srgap2,rap1a,notch1,slitrk1,htr2a,vdr,cdx2,fgf9,tenm4,cxcl14,msx2,cntn1,reln,sema3a,hmg20a,lingo1,znf703,egr3,olfm2,dvl2,adm,lrrc4c,pax6,il34,cyr61,lpar3,cdh5,negr1,sema3f…	11.0558
24	1.02502e-11	GO:0030154	cell differentiation	gfra4,vax2,fgfr3,nkx1-1,maea,ctbp1,atoh8,prom1,slit2,sgcz,fat1,sorbs2,rbm46,sfrp2,ednra,spry1,kiaa1109,ank2,tet2,ppp3ca,unc5c,enam,ptprs,rest,lpl,ugcg,musk,klf4,c9orf72,ptprd,dmrt3,gadd45g,myh6,rpgrip1,inpp5j,lif,apc,camk4,wdr36,fbxl17,myo18b,patz1,stx2,xbp1,fbn2,hsd17b4,sema6a,otp,enc1,foxd1,cartpt,marveld2,mef2c,nr2f1,plk2,isl1,hcn1,ghr,slc1a3,gdnf,adamts12,wdr7,tcf4,mex3c,smad2,skor2,ildr2,dsc…	10.9893
25	1.16328e-11	GO:0048729	tissue morphogenesis	slit2,sfrp2,ednra,spry1,egf,fras1,klf4,myh6,lif,foxd1,mef2c,isl1,gdnf,adamts12,smad2,robo1,tnnt2,notch1,tbx2,ap2b1,col4a1,gpc6,pcdh8,vdr,wnt11,csf1r,msx2,sema3a,podxl,dvl2,adm,cd44,cyr61,rpgrip1l,sall1,foxf1,ror1,s1pr1,prickle2,psmd6,tgfb2,prox1,bmp2,hey2,bmp5,osr1,nrp1,fzd1,twist1,foxf2,bcl2,gli3,eya1,hey1,rspo2,fgfr2,ski,ajap1,eng,tsc1,ar,ttc8,fmn1,actc1,itgax,stat1,pofut2,zeb2,cxcr4,hoxb2,hoxb…	10.9343
26	2.34463e-11	GO:0002009	morphogenesis of an epithelium	slit2,sfrp2,ednra,spry1,egf,fras1,klf4,lif,foxd1,mef2c,gdnf,adamts12,notch1,tbx2,ap2b1,col4a1,gpc6,pcdh8,vdr,wnt11,csf1r,msx2,sema3a,podxl,dvl2,adm,cd44,cyr61,rpgrip1l,sall1,foxf1,ror1,prickle2,psmd6,tgfb2,prox1,bmp2,bmp5,osr1,nrp1,fzd1,twist1,foxf2,bcl2,gli3,eya1,rspo2,fgfr2,ski,ajap1,eng,tsc1,ar,ttc8,fmn1,itgax,stat1,zeb2,cxcr4,hoxb2,hoxb4,sall4,snai1,tgm2,ndrg4,gata4,psmd5,rxra,wnt7b,gli2,vegf…	10.6299
27	5.61376e-11	GO:0050767	regulation of neurogenesis	slit2,sfrp2,ppp3ca,ptprs,rest,klf4,ptprd,inpp5j,lif,wdr36,sema6a,otp,enc1,mef2c,nr2f1,plk2,isl1,tcf4,skor2,dscam,robo1,rtn4rl1,plxna2,srgap2,rap1a,notch1,slitrk1,tenm4,cntn1,reln,sema3a,hmg20a,lingo1,dvl2,lrrc4c,pax6,il34,lpar3,negr1,sema3f,nckipsd,cpne5,fezf2,prox1,bmp2,hey2,oprm1,foxo3,bmp5,rims1,nlgn1,bcl6,ptk2b,xrcc2,nrp1,zeb1,fzd1,bcl2,gli3,bmp6,cdh2,lyn,eya1,hey1,gdf6,asap1,zfyve27,cxcl12,z…	10.2507
28	6.15156e-11	GO:0003002	regionalization	vax2,sfrp2,spry1,dmrt2,dmrt3,pcsk5,foxd1,mef2c,isl1,gdnf,smad2,ets2,robo1,plxna2,notch1,pcdh8,hoxc13,cdx2,msx2,reln,sema3a,pcsk6,dvl2,alx4,pax6,rpgrip1l,foxf1,sema3f,fezf2,disp1,bmp2,hey2,osr1,xrcc2,nrp1,gli3,hey1,fgfr2,ski,ar,lfng,acvr2a,zeb2,hoxb1,hoxb2,hoxb4,snai1,mafb,gata4,pofut1,wnt7b,barx1,gli2,emx2,wdr19,wnt5a	10.211
29	6.18217e-11	GO:0048518	positive regulation of biological process	tex261,dctn1,fgfr3,nkx1-1,ctbp1,atoh8,msantd1,ldb2,prom1,clnk,evc,slit2,cep135,cdkn2aip,hpgd,npy5r,rbm46,sfrp2,nr3c2,spry1,egf,alpk1,ank2,mad2l1,tet2,tacr3,ppp3ca,h2afz,tspan5,unc5c,snca,enam,ptprs,rest,lpl,abhd17a,cfd,anxa3,dgkq,musk,slc24a2,klf4,c9orf72,ptprd,dmrt2,cdc14b,gadd45g,lif,apc,camk4,patz1,clip1,xbp1,fbn2,sema6a,otp,enc1,foxd1,cartpt,mef2c,nr2f1,glrx,chd1,cd180,htr1a,plk2,isl1,ghr,prk…	10.2089
30	7.25897e-11	GO:0032989	cellular component morphogenesis	gfra4,vax2,slit2,fat1,ank2,ppp3ca,unc5c,enam,ptprs,c9orf72,ptprd,myh6,wdr36,sema6a,foxd1,mef2c,isl1,slc1a3,gdnf,skor2,dscam,epha6,robo1,plxna2,srgap2,tnnt2,notch1,auts2,slitrk1,vdr,tenm4,tsku,csf1r,csrp2,reln,sema3a,lingo1,dvl2,ephb4,lrrc4c,cd44,pax6,siah1,lpar3,flrt1,cdh11,cdh5,cdh13,sema3f,cpne5,fezf2,enah,tgfb2,prox1,btbd3,tbpl1,bves,phip,rims1,nlgn1,bcl6,dock10,ptk2b,nrp1,nrn1,bcl2,cdh10,cdh1…	10.1391
31	1.49716e-10	GO:0001655	urogenital system development	prom1,slit2,hpgd,dchs2,spry1,fras1,pcsk5,lif,foxd1,mef2c,gdnf,smad2,adamts1,notch1,col4a1,pdgfd,wnt11,podxl,tmed10,rpgrip1l,sall1,foxf1,tgfb2,prox1,bmp2,sim1,bcl2l11,wwtr1,osr1,nrp1,bcl2,gli3,bmp6,eya1,calb1,angpt1,has2,fgfr2,tsc1,ar,ttc8,fmn1,crip1,stat1,myocd,pkhd1,rxra,eaf2,wnt7b,upk3a,gli2,vegfa,emx2,wnt5a	9.82473
32	1.82825e-10	GO:0048646	anatomical structure formation involved in morphogenesis	atoh8,prom1,slit2,rbm46,sfrp2,ednra,spry1,egf,ank2,enam,anxa3,klf4,dmrt2,myh6,xbp1,fbn2,sema6a,foxd1,mef2c,plk2,isl1,gdnf,tcf4,smad2,skor2,gja5,dscam,ets2,runx1,adamts1,robo1,plxna2,tnnt2,notch1,tbx2,col4a1,pcdh8,col2a1,cdx2,fgf9,tenm4,wnt11,msx2,cnot2,csrp2,reln,podxl,tjp1,egr3,dvl2,ephb4,adm,fjx1,pax6,cyr61,sall1,cdh5,cdh13,foxf1,s1pr1,adamts9,tgfb2,ptpn14,prox1,bmp2,tbpl1,hey2,bcl2l11,bmp5,bcl…	9.73796
33	1.88561e-10	GO:0007417	central nervous system development	vax2,dctn1,slit2,sfrp2,pcdh18,egf,ppp3ca,unc5c,ptprs,anxa3,ncan,dmrt3,lif,otp,isl1,gdnf,rax,skor2,olig1,robo1,rtn4rl1,nr0b1,plxna2,pou3f1,sypl2,srgap2,notch1,hpcal4,col4a1,col2a1,ufm1,fgf9,tenm4,tsku,nmur2,csf1r,pitx1,drd1,cntn1,reln,sema3a,slc1a2,pax6,il34,rpgrip1l,sall1,cdh11,ror1,s1pr1,sema3f,qars,fezf2,prox1,bmp2,btbd3,bcl2l11,ifngr1,foxo3,bmp5,mcph1,htr5a,nrp1,zeb1,fzd1,dnah5,bcl2,gli3,cdh2,…	9.72455
34	2.37481e-10	GO:0072001	renal system development	prom1,slit2,hpgd,dchs2,spry1,fras1,pcsk5,lif,foxd1,mef2c,gdnf,smad2,adamts1,notch1,col4a1,pdgfd,wnt11,podxl,tmed10,rpgrip1l,sall1,foxf1,tgfb2,prox1,bmp2,sim1,bcl2l11,wwtr1,osr1,nrp1,bcl2,gli3,bmp6,eya1,calb1,angpt1,has2,fgfr2,tsc1,ttc8,fmn1,stat1,myocd,pkhd1,wnt7b,upk3a,gli2,vegfa,emx2,wnt5a	9.62437
35	2.44275e-10	GO:0003007	heart morphogenesis	slit2,npy5r,sfrp2,spry1,myh6,mef2c,isl1,gja5,adamts1,robo1,tnnt2,notch1,tbx2,col2a1,wnt11,msx2,dvl2,ephb4,cyr61,foxf1,s1pr1,tgfb2,prox1,bmp2,hey2,bmp5,naca,nrp1,fzd1,twist1,eya1,hey1,has2,fgfr2,eng,actc1,snai1,ndrg4,gata4,rxra,olfm1,vegfa,adam15,ccdc40,sox18,wnt5a	9.61212
36	3.84523e-10	GO:0010628	positive regulation of gene expression	nkx1-1,atoh8,msantd1,ldb2,rbm46,sfrp2,egf,ank2,tet2,ppp3ca,h2afz,rest,dgkq,musk,klf4,dmrt2,lif,camk4,patz1,xbp1,foxd1,mef2c,nr2f1,isl1,prkaa1,gdnf,rax,tcf4,smad2,ets2,erg,runx1,robo1,aatf,pou3f1,sox13,dcaf6,mapkapk2,notch1,nfyc,auts2,nufip1,gtf2f2,vdr,hoxc13,cdx2,fgf9,wnt11,pitx1,drd1,cntn1,egr3,dvl2,alx4,trim44,spon1,pax6,il34,cyr61,sall1,cdh13,foxf1,s1pr1,fezf2,polr1c,tgfb2,prox1,bmp2,tbpl1,ari…	9.41508
37	8.79458e-10	GO:0051960	regulation of nervous system development	slit2,sfrp2,egf,ppp3ca,snca,ptprs,rest,musk,klf4,ptprd,inpp5j,lif,wdr36,sema6a,otp,enc1,mef2c,nr2f1,plk2,isl1,tcf4,skor2,dscam,robo1,rtn4rl1,plxna2,srgap2,rap1a,notch1,slitrk1,tenm4,cntn1,reln,sema3a,hmg20a,lingo1,dvl2,lrrc4c,pax6,il34,lpar3,flrt1,negr1,sema3f,nckipsd,cpne5,fezf2,prox1,bmp2,hey2,oprm1,foxo3,bmp5,rims1,nlgn1,bcl6,ptk2b,xrcc2,nrp1,zeb1,fzd1,bcl2,gli3,bmp6,cdh2,lyn,eya1,hey1,gdf6,as…	9.05578
38	1.07202e-09	GO:0060284	regulation of cell development	slit2,sfrp2,ppp3ca,ptprs,rest,klf4,ptprd,inpp5j,lif,wdr36,sema6a,otp,enc1,mef2c,nr2f1,plk2,isl1,tcf4,skor2,dscam,robo1,rtn4rl1,plxna2,srgap2,rap1a,notch1,slitrk1,tenm4,cntn1,reln,sema3a,hmg20a,lingo1,dvl2,lrrc4c,pax6,il34,lpar3,cdh5,negr1,sema3f,nckipsd,cpne5,fezf2,prox1,bmp2,hey2,oprm1,foxo3,bmp5,rims1,nlgn1,bcl6,ptk2b,naca,xrcc2,nrp1,zeb1,fzd1,hdac9,bcl2,gli3,bmp6,cdh2,lyn,eya1,hey1,gdf6,has2,a…	8.9698
39	1.10587e-09	GO:0023051	regulation of signaling	rab11fip5,fgfr3,clnk,evc,afap1,sorcs2,slit2,arap2,slc25a4,cdkn2aip,fbxo8,npy5r,sfrp2,nr3c2,spry1,egf,alpk1,ank2,ppp3ca,tspan5,snca,ptprs,rest,dusp4,ptpn13,anxa3,ugcg,dgkq,slc24a2,klf4,c9orf72,cntnap4,gadd45g,lif,slc8b1,apc,fbxl17,xbp1,fbn2,sema6a,foxd1,cartpt,mef2c,cd180,htr1a,plk2,isl1,ghr,prkaa1,slc1a3,gdnf,prlr,adamts12,cplx4,tcf4,mbd2,smad2,skor2,arhgap31,igsf11,gja5,sh3bgr,runx1,robo1,taok1,…	8.95629
40	1.43602e-09	GO:0120036	plasma membrane bounded cell projection organization	gfra4,vax2,dctn1,slit2,cep135,sfrp2,ppp3ca,unc5c,ptprs,klf4,c9orf72,ptprd,cdc14b,inpp5j,apc,wdr36,sema6a,enc1,foxd1,mef2c,nr2f1,plk2,isl1,gdnf,skor2,dscam,ncam2,epha6,robo1,rtn4rl1,plxna2,srgap2,rap1a,notch1,auts2,slitrk1,tsku,csf1r,cntn1,reln,sema3a,podxl,lingo1,dvl2,ephb4,adm,lrrc4c,ttc17,cd44,pax6,siah1,lpar3,flrt1,rpgrip1l,dynlrb2,cdh11,cdh13,negr1,s1pr1,sema3f,nckipsd,cpne5,fezf2,enah,btbd3,…	8.84284
41	1.44067e-09	GO:0072359	circulatory system development	slit2,sgcz,sorbs2,hpgd,npy5r,sfrp2,ednra,spry1,egf,ank2,rest,anxa3,klf4,pcsk5,myh6,lif,myo18b,xbp1,sema6a,mef2c,plk2,isl1,tcf4,mbd2,smad2,gja5,runx1,adamts1,robo1,sypl2,rap1a,tnnt2,notch1,tbx2,ap2b1,col4a1,col2a1,cdx2,fgf9,pdgfd,tenm4,wnt11,msx2,egr3,dvl2,ephb4,adm,pax6,cyr61,rpgrip1l,sall1,cdh5,cdh13,foxf1,s1pr1,adamts9,tgfb2,ptpn14,prox1,bmp2,hey2,rps6ka2,bves,bmp5,fgf12,tfdp2,osr1,apob,ptk2b,n…	8.84143
42	1.52652e-09	GO:0010646	regulation of cell communication	rab11fip5,fgfr3,clnk,evc,afap1,sorcs2,slit2,arap2,slc25a4,cdkn2aip,fbxo8,npy5r,sfrp2,nr3c2,spry1,egf,alpk1,ank2,ppp3ca,tspan5,snca,ptprs,rest,dusp4,ptpn13,anxa3,ugcg,dgkq,slc24a2,klf4,c9orf72,cntnap4,gadd45g,lif,slc8b1,apc,fbxl17,xbp1,fbn2,sema6a,foxd1,cartpt,mef2c,cd180,htr1a,plk2,isl1,ghr,prkaa1,slc1a3,gdnf,prlr,adamts12,cplx4,tcf4,mbd2,smad2,skor2,arhgap31,igsf11,gja5,sh3bgr,runx1,robo1,taok1,…	8.8163
43	1.62969e-09	GO:0060322	head development	vax2,slit2,sfrp2,ednra,pcdh18,egf,ppp3ca,unc5c,ptprs,anxa3,otp,isl1,rax,skor2,robo1,rtn4rl1,nr0b1,plxna2,pou3f1,sypl2,srgap2,notch1,col4a1,col2a1,ufm1,fgf9,ddx10,tsku,csf1r,pitx1,drd1,cntn1,reln,sema3a,slc1a2,pax6,rpgrip1l,sall1,s1pr1,qars,fezf2,prox1,bmp2,btbd3,bcl2l11,foxo3,bmp5,mcph1,htr5a,nrp1,fzd1,dnah5,bcl2,gli3,cdh2,crispld1,ext1,trappc9,fgfr2,crtac1,cxcl12,ski,shank1,barhl1,tsc1,phf8,cdk5…	8.78789
44	1.65588e-09	GO:0009790	embryo development	vax2,atoh8,rbm46,sfrp2,ednra,fras1,klf4,dmrt2,pcsk5,myh6,lif,myo18b,fbn2,mef2c,isl1,gdnf,mbd2,smad2,gja5,ets2,plxna2,aatf,notch1,tbx2,pcdh8,col2a1,cdx2,fgf9,tenm4,wnt11,pitx1,msx2,cnot2,sema3a,tjp1,pcsk6,dvl2,adm,alx4,pax6,cyr61,rpgrip1l,sall1,foxf1,sema3f,disp1,tgfb2,prox1,bmp2,hey2,bcl2l11,bmp5,osr1,apob,wnt9a,xrcc2,insig1,nrp1,zeb1,fzd1,twist1,syf2,foxf2,gli3,eya1,hey1,rspo2,angpt1,ext1,zfat,f…	8.78097
45	1.69749e-09	GO:0048858	cell projection morphogenesis	gfra4,vax2,slit2,ppp3ca,unc5c,ptprs,c9orf72,ptprd,wdr36,sema6a,foxd1,isl1,gdnf,skor2,dscam,epha6,robo1,plxna2,srgap2,notch1,auts2,slitrk1,tsku,csf1r,reln,sema3a,lingo1,dvl2,ephb4,lrrc4c,cd44,pax6,siah1,lpar3,flrt1,cdh11,sema3f,cpne5,fezf2,enah,btbd3,rims1,nlgn1,dock10,nrp1,nrn1,bcl2,gli3,cdh2,ext1,gfra1,fgfr2,zfyve27,cxcl12,zswim8,robo3,shank1,l1cam,fgf13,ttc8,evl,eif2ak4,crabp2,igsf9,nr4a2,zeb2,…	8.77019
46	2.0943e-09	GO:0030030	cell projection organization	gfra4,vax2,dctn1,slit2,cep135,sfrp2,ppp3ca,unc5c,ptprs,klf4,c9orf72,ptprd,cdc14b,inpp5j,apc,wdr36,sema6a,enc1,foxd1,mef2c,nr2f1,plk2,isl1,gdnf,skor2,dscam,ncam2,epha6,robo1,rtn4rl1,plxna2,srgap2,rap1a,notch1,auts2,slitrk1,tsku,csf1r,cntn1,reln,sema3a,podxl,lingo1,dvl2,ephb4,adm,lrrc4c,ttc17,cd44,pax6,siah1,lpar3,flrt1,rpgrip1l,dynlrb2,cdh11,cdh13,negr1,s1pr1,sema3f,nckipsd,cpne5,fezf2,enah,btbd3,…	8.67896
47	2.3722e-09	GO:0000902	cell morphogenesis	gfra4,vax2,slit2,fat1,ppp3ca,unc5c,enam,ptprs,c9orf72,ptprd,wdr36,sema6a,foxd1,mef2c,isl1,slc1a3,gdnf,skor2,dscam,epha6,robo1,plxna2,srgap2,notch1,auts2,slitrk1,vdr,tsku,csf1r,reln,sema3a,lingo1,dvl2,ephb4,lrrc4c,cd44,pax6,siah1,lpar3,flrt1,cdh11,cdh5,cdh13,sema3f,cpne5,fezf2,enah,tgfb2,prox1,btbd3,bves,phip,rims1,nlgn1,bcl6,dock10,ptk2b,nrp1,nrn1,bcl2,cdh10,cdh12,cdh18,myo10,gli3,cdh2,ext1,has2,…	8.62485
48	2.90747e-09	GO:0007420	brain development	vax2,slit2,sfrp2,pcdh18,egf,ppp3ca,unc5c,ptprs,anxa3,otp,isl1,rax,skor2,robo1,rtn4rl1,nr0b1,plxna2,pou3f1,sypl2,srgap2,notch1,col4a1,ufm1,fgf9,tsku,csf1r,pitx1,drd1,cntn1,reln,sema3a,slc1a2,pax6,rpgrip1l,sall1,s1pr1,qars,fezf2,prox1,bmp2,btbd3,bcl2l11,foxo3,bmp5,mcph1,htr5a,nrp1,fzd1,dnah5,bcl2,gli3,cdh2,ext1,trappc9,fgfr2,crtac1,cxcl12,ski,shank1,barhl1,tsc1,phf8,cdk5rap2,fgf13,ttc8,grin2a,satb2…	8.53649
49	3.00396e-09	GO:0048812	neuron projection morphogenesis	gfra4,vax2,slit2,ppp3ca,unc5c,ptprs,c9orf72,ptprd,wdr36,sema6a,foxd1,isl1,gdnf,skor2,dscam,epha6,robo1,plxna2,srgap2,notch1,auts2,slitrk1,tsku,csf1r,reln,sema3a,lingo1,dvl2,ephb4,lrrc4c,pax6,siah1,lpar3,flrt1,cdh11,sema3f,cpne5,fezf2,enah,btbd3,rims1,nlgn1,dock10,nrp1,nrn1,bcl2,gli3,cdh2,ext1,gfra1,fgfr2,zfyve27,cxcl12,zswim8,robo3,shank1,l1cam,fgf13,ttc8,evl,eif2ak4,crabp2,igsf9,nr4a2,zeb2,cxcr4…	8.52231
50	3.34199e-09	GO:0120039	plasma membrane bounded cell projection morphogenesis	gfra4,vax2,slit2,ppp3ca,unc5c,ptprs,c9orf72,ptprd,wdr36,sema6a,foxd1,isl1,gdnf,skor2,dscam,epha6,robo1,plxna2,srgap2,notch1,auts2,slitrk1,tsku,csf1r,reln,sema3a,lingo1,dvl2,ephb4,lrrc4c,cd44,pax6,siah1,lpar3,flrt1,cdh11,sema3f,cpne5,fezf2,enah,btbd3,rims1,nlgn1,dock10,nrp1,nrn1,bcl2,gli3,cdh2,ext1,gfra1,fgfr2,zfyve27,cxcl12,zswim8,robo3,shank1,l1cam,fgf13,ttc8,evl,eif2ak4,crabp2,igsf9,nr4a2,zeb2,…	8.47599
51	3.70485e-09	GO:0051094	positive regulation of developmental process	atoh8,prom1,slit2,sfrp2,spry1,egf,enam,rest,lpl,anxa3,klf4,ptprd,dmrt2,lif,xbp1,fbn2,sema6a,otp,enc1,foxd1,mef2c,plk2,isl1,ghr,prkaa1,gdnf,tcf4,smad2,dscam,runx1,robo1,plxna2,rap1a,notch1,tbx2,slitrk1,htr2a,vdr,cdx2,fgf9,pdgfd,tenm4,msx2,cntn1,reln,sema3a,znf703,egr3,olfm2,dvl2,adm,pax6,il34,cyr61,lpar3,flrt1,cdh5,negr1,nckipsd,cpne5,adamts9,fezf2,tgfb2,prox1,bmp2,hey2,oprm1,foxo3,bmp5,rims1,nlgn…	8.43123
52	3.73798e-09	GO:0003205	cardiac chamber development	slit2,npy5r,sfrp2,ank2,pcsk5,myh6,mef2c,isl1,gja5,adamts1,robo1,tnnt2,notch1,tbx2,ap2b1,wnt11,msx2,cyr61,sall1,foxf1,tgfb2,prox1,hey2,bmp5,naca,nrp1,fzd1,hey1,fgfr2,eng,sall4,myocd,gata4,rxra,wnt5a	8.42736
53	6.59553e-09	GO:0035295	tube development	atoh8,prom1,slit2,hpgd,sfrp2,ednra,spry1,egf,anxa3,klf4,pcsk5,lif,myo18b,xbp1,sema6a,foxd1,mef2c,plk2,isl1,gdnf,adamts12,tcf4,smad2,gja5,runx1,robo1,plxna2,rap1a,notch1,tbx2,col4a1,col2a1,vdr,cdx2,fgf9,wnt11,csf1r,msx2,podxl,egr3,dvl2,ephb4,adm,alx4,pax6,cyr61,rpgrip1l,sall1,cdh5,cdh13,foxf1,s1pr1,adamts9,tgfb2,prox1,bmp2,sim1,hey2,bcl2l11,bmp5,wwtr1,osr1,apob,ptk2b,nrp1,zeb1,fzd1,twist1,hdac9,fo…	8.18075
54	6.75636e-09	GO:0048598	embryonic morphogenesis	vax2,atoh8,sfrp2,fras1,klf4,fbn2,mef2c,gdnf,smad2,gja5,ets2,notch1,tbx2,pcdh8,col2a1,fgf9,tenm4,wnt11,pitx1,msx2,dvl2,adm,alx4,pax6,cyr61,rpgrip1l,sall1,foxf1,tgfb2,prox1,bcl2l11,bmp5,osr1,wnt9a,insig1,zeb1,fzd1,twist1,syf2,foxf2,gli3,eya1,rspo2,ext1,fgfr2,ski,eng,tsc1,ar,slc44a4,crabp2,satb2,pofut2,acvr2a,zeb2,hoxb1,hoxb2,hoxb4,itgb3,sall4,snai1,eya2,mafb,ndrg4,gata4,ctr9,wnt7b,tbx15,gli2,wdr19,…	8.17029
55	7.31376e-09	GO:0032990	cell part morphogenesis	gfra4,vax2,slit2,ppp3ca,unc5c,ptprs,c9orf72,ptprd,wdr36,sema6a,foxd1,isl1,gdnf,skor2,dscam,epha6,robo1,plxna2,srgap2,notch1,auts2,slitrk1,tsku,csf1r,reln,sema3a,lingo1,dvl2,ephb4,lrrc4c,cd44,pax6,siah1,lpar3,flrt1,cdh11,sema3f,cpne5,fezf2,enah,btbd3,rims1,nlgn1,dock10,nrp1,nrn1,bcl2,gli3,cdh2,ext1,gfra1,fgfr2,zfyve27,cxcl12,zswim8,robo3,shank1,l1cam,fgf13,ttc8,evl,eif2ak4,crabp2,igsf9,nr4a2,zeb2,…	8.13586
56	7.52172e-09	GO:2000026	regulation of multicellular organismal development	atoh8,prom1,slit2,sfrp2,spry1,kiaa1109,egf,ppp3ca,snca,enam,ptprs,rest,anxa3,musk,klf4,ptprd,dmrt2,dmrt3,myh6,inpp5j,lif,camk4,wdr36,xbp1,fbn2,sema6a,otp,enc1,foxd1,cartpt,mef2c,nr2f1,plk2,isl1,prkaa1,gdnf,adamts12,tcf4,smad2,skor2,dscam,runx1,robo1,rtn4rl1,plxna2,sox13,srgap2,rap1a,notch1,tbx2,ap2b1,gpc6,slitrk1,vdr,cdx2,fgf9,pdgfd,tenm4,wnt11,msx2,cntn1,reln,sema3a,hmg20a,lingo1,znf703,egr3,dvl…	8.12368
57	7.78896e-09	GO:0060429	epithelium development	atoh8,ldb2,prom1,slit2,fat1,sfrp2,ednra,spry1,kiaa1109,egf,enam,ptprs,fras1,ugcg,klf4,dmrt2,lif,xbp1,hsd17b4,foxd1,marveld2,mef2c,gdnf,adamts12,smad2,gja5,runx1,robo1,nr0b1,plxna2,pou3f1,rap1a,notch1,tbx2,ap2b1,col4a1,gpc6,pcdh8,col2a1,vdr,hoxc13,cdx2,wnt11,csf1r,msx2,sema3a,podxl,tjp1,pcsk6,znf703,dvl2,adm,alx4,cd44,pax6,cyr61,rpgrip1l,sall1,cdh5,foxf1,ror1,s1pr1,prickle2,psmd6,tgfb2,ush2a,prox1…	8.10852
58	7.93244e-09	GO:0060562	epithelial tube morphogenesis	slit2,sfrp2,ednra,spry1,egf,foxd1,mef2c,gdnf,adamts12,notch1,tbx2,col4a1,vdr,wnt11,csf1r,msx2,podxl,dvl2,adm,sall1,foxf1,tgfb2,prox1,bmp2,bmp5,osr1,nrp1,fzd1,twist1,bcl2,gli3,eya1,rspo2,fgfr2,ski,eng,tsc1,ar,fmn1,itgax,zeb2,cxcr4,sall4,ndrg4,gata4,gli2,vegfa,ccdc40,sox18,wnt5a	8.10059
59	8.84903e-09	GO:0023052	signaling	gfra4,vax2,dctn1,rab11fip5,fgfr3,atoh8,fgfbp2,rab28,clnk,stk32b,evc,afap1,sorcs2,slit2,arap2,fat1,sorbs2,slc25a4,cdkn2aip,hpgd,fbxo8,npy5r,sfrp2,nr3c2,ednra,pgrmc2,spry1,egf,alpk1,ank2,tacr3,ppp3ca,tspan5,unc5c,snca,ptprs,rest,lpl,dusp4,cfd,ptpn13,anxa3,ugcg,dgkq,musk,slc24a2,klf4,mtap,c9orf72,ptprd,dmrt3,pcsk5,cdc14b,cntnap4,gadd45g,myh6,lif,slc8b1,apc,camk4,fbxl17,rab36,stx2,xbp1,fbn2,sema6a,fo…	8.0531
60	1.09807e-08	GO:0051239	regulation of multicellular organismal process	gfra4,rab11fip5,atoh8,prom1,slit2,sfrp2,spry1,kiaa1109,egf,ank2,tacr3,ppp3ca,snca,enam,ptprs,rest,lpl,anxa3,musk,klf4,ptprd,dmrt2,dmrt3,gadd45g,myh6,inpp5j,lif,apc,camk4,wdr36,xbp1,fbn2,sema6a,otp,enc1,foxd1,cartpt,mef2c,nr2f1,lnpep,plk2,isl1,ghr,prkaa1,gdnf,prlr,adamts12,tcf4,smad2,skor2,zbtb20,igsf11,gja5,dscam,runx1,robo1,rtn4rl1,plxna2,kiss1,sox13,srgap2,mapkapk2,rap1a,ppp1r12b,tnnt2,mapk13,i…	7.95937
61	1.31989e-08	GO:0045944	positive regulation of transcription by RNA polymerase II	nkx1-1,atoh8,ldb2,sfrp2,tet2,ppp3ca,h2afz,rest,klf4,dmrt2,lif,patz1,xbp1,foxd1,mef2c,nr2f1,isl1,gdnf,rax,tcf4,smad2,ets2,erg,runx1,aatf,sox13,dcaf6,notch1,nfyc,auts2,nufip1,gtf2f2,vdr,hoxc13,pitx1,egr3,alx4,pax6,cyr61,sall1,cdh13,foxf1,s1pr1,fezf2,tgfb2,prox1,bmp2,tbpl1,hey2,vgll2,foxo3,phip,cga,bmp5,wwtr1,tfdp2,myt1l,osr1,naca,insig1,klf6,zeb1,twist1,ahr,foxf2,gli3,bmp6,eya1,hnf4g,hey1,zfat,mafa…	7.87946
62	1.44051e-08	GO:0072132	mesenchyme morphogenesis	isl1,smad2,robo1,notch1,tbx2,wnt11,msx2,foxf1,tgfb2,bmp2,hey2,bmp5,osr1,twist1,hey1,eng,actc1,snai1,wnt5a	7.84148
63	1.58567e-08	GO:0050793	regulation of developmental process	fgfr3,atoh8,prom1,slit2,sfrp2,spry1,kiaa1109,egf,ppp3ca,snca,enam,ptprs,rest,lpl,anxa3,musk,klf4,ptprd,dmrt2,dmrt3,myh6,inpp5j,lif,apc,camk4,wdr36,xbp1,fbn2,sema6a,otp,enc1,foxd1,cartpt,mef2c,nr2f1,plk2,isl1,ghr,prkaa1,gdnf,adamts12,tcf4,mex3c,smad2,skor2,dscam,runx1,robo1,rtn4rl1,plxna2,sox13,srgap2,rap1a,notch1,tbx2,ap2b1,gpc6,slitrk1,htr2a,vdr,cdx2,fgf9,pdgfd,tenm4,wnt11,csf1r,cxcl14,msx2,nuak…	7.79979
64	1.71714e-08	GO:0048667	cell morphogenesis involved in neuron differentiation	gfra4,vax2,slit2,ppp3ca,unc5c,ptprs,c9orf72,ptprd,wdr36,sema6a,foxd1,mef2c,isl1,slc1a3,gdnf,skor2,dscam,epha6,robo1,plxna2,notch1,auts2,slitrk1,tsku,csf1r,reln,sema3a,lingo1,ephb4,lrrc4c,pax6,siah1,lpar3,cdh11,sema3f,fezf2,enah,btbd3,nlgn1,dock10,nrp1,bcl2,gli3,cdh2,ext1,gfra1,fgfr2,zfyve27,cxcl12,zswim8,robo3,shank1,l1cam,fgf13,ttc8,evl,crabp2,igsf9,nr4a2,zeb2,cxcr4,srcin1,dok5,b4galt6,olfm1,eif…	7.76519
65	1.93245e-08	GO:0060485	mesenchyme development	sfrp2,ednra,spry1,fbxl17,sema6a,foxd1,mef2c,isl1,gdnf,smad2,robo1,notch1,tbx2,fgf9,wnt11,msx2,sema3a,znf703,foxf1,sema3f,tgfb2,bmp2,hey2,bmp5,wwtr1,osr1,nrp1,twist1,foxf2,bcl2,ldlrad4,hey1,has2,fgfr2,eng,actc1,stat1,pofut2,zeb2,snai1,gata4,olfm1,adam15,tcf7l2,wnt5a	7.71389
66	2.49411e-08	GO:0032501	multicellular organismal process	gfra4,vax2,dctn1,rab11fip5,fgfr3,nkx1-1,maea,atoh8,ldb2,prom1,evc,slit2,sgcz,frg1,fat1,sorbs2,hpgd,npy5r,rbm46,dchs2,sfrp2,ednra,pcdh18,spry1,kiaa1109,egf,ank2,tet2,tacr3,ppp3ca,unc5c,snca,enam,ptprs,rest,lpl,anxa3,fras1,ugcg,dgkq,ncan,musk,slc24a2,klf4,dmrta1,c9orf72,ptprd,dmrt2,dmrt3,pcsk5,gadd45g,myh6,rpgrip1,inpp5j,lif,apc,camk4,wdr36,fbxl17,myo18b,mn1,patz1,stx2,xbp1,fbn2,aldh7a1,hsd17b4,sem…	7.60308
67	2.86361e-08	GO:0043009	chordate embryonic development	rbm46,sfrp2,ednra,dmrt2,pcsk5,myh6,lif,myo18b,mef2c,isl1,smad2,plxna2,notch1,pcdh8,col2a1,cdx2,fgf9,wnt11,cnot2,tjp1,dvl2,adm,alx4,pax6,cyr61,rpgrip1l,foxf1,tgfb2,prox1,bmp2,hey2,bcl2l11,bmp5,osr1,apob,wnt9a,xrcc2,zeb1,fzd1,twist1,syf2,gli3,eya1,hey1,angpt1,ext1,zfat,fgfr2,ski,tsc1,ar,lfng,satb2,acvr2a,zeb2,krt19,hoxb1,hoxb2,hoxb4,sall4,snai1,rxra,ctr9,pofut1,wnt7b,med21,tbx15,gli2,vegfa,sox6,wdr…	7.54309
68	2.93267e-08	GO:0048589	developmental growth	fgfr3,evc,slit2,sorbs2,sfrp2,spry1,ppp3ca,ptprs,musk,c9orf72,myh6,wdr36,sema6a,mef2c,ghr,mex3c,smad2,dscam,notch1,tbx2,auts2,slitrk1,fgf9,tenm4,wnt11,msx2,sema3a,adm,slc1a2,lpar3,flrt1,sall1,s1pr1,sema3f,cpne5,tgfb2,prox1,hey2,bcl2l11,foxo3,cga,rims1,pls1,wwtr1,naca,xrcc2,nrp1,nrn1,bcl2,gli3,rspo2,fgfr2,zfyve27,cxcl12,shank1,l1cam,ar,fgf13,ttc8,eif2ak4,fmn1,crabp2,zeb2,cxcr4,sall4,ndrg4,gsn,gata4…	7.53274
69	3.21166e-08	GO:0010975	regulation of neuron projection development	slit2,sfrp2,ppp3ca,ptprs,klf4,ptprd,inpp5j,wdr36,sema6a,enc1,mef2c,nr2f1,plk2,skor2,dscam,robo1,rtn4rl1,plxna2,rap1a,slitrk1,cntn1,reln,sema3a,lingo1,dvl2,lrrc4c,lpar3,negr1,sema3f,nckipsd,cpne5,fezf2,bmp5,rims1,nlgn1,ptk2b,nrp1,fzd1,cdh2,lyn,asap1,zfyve27,cxcl12,zswim8,shank1,tsc1,l1cam,fgf13,prkd1,crabp2,stx1b,zeb2,cxcr4,srcin1,ndrg4,pmp22,syt4,olfm1,eif4g2,dnm1l,dennd5a,vegfa,epo,wnt5a	7.49327
70	4.02638e-08	GO:0045893	positive regulation of transcription, DNA-templated	nkx1-1,atoh8,msantd1,ldb2,sfrp2,egf,tet2,ppp3ca,h2afz,rest,klf4,dmrt2,lif,camk4,patz1,xbp1,foxd1,mef2c,nr2f1,isl1,prkaa1,gdnf,rax,tcf4,smad2,ets2,erg,runx1,aatf,pou3f1,sox13,dcaf6,notch1,nfyc,auts2,nufip1,gtf2f2,vdr,hoxc13,cdx2,wnt11,pitx1,egr3,dvl2,alx4,trim44,pax6,cyr61,sall1,cdh13,foxf1,s1pr1,fezf2,tgfb2,prox1,bmp2,tbpl1,arid1b,hey2,vgll2,foxo3,phip,cga,bmp5,wwtr1,tfdp2,myt1l,osr1,naca,insig1,…	7.39509
71	4.10288e-08	GO:0061564	axon development	gfra4,vax2,slit2,unc5c,ptprs,klf4,c9orf72,wdr36,sema6a,foxd1,isl1,gdnf,dscam,ncam2,epha6,robo1,rtn4rl1,plxna2,notch1,auts2,slitrk1,tsku,csf1r,reln,sema3a,lingo1,ephb4,lrrc4c,pax6,siah1,lpar3,cdh11,sema3f,fezf2,enah,nrp1,bcl2,gli3,cdh2,ext1,gfra1,fgfr2,zfyve27,crtac1,cxcl12,zswim8,robo3,l1cam,fgf13,ttc8,evl,crabp2,igsf9,nr4a2,zeb2,cxcr4,dok5,b4galt6,olfm1,eif4g2,boc,vax1,gli2,vegfa,wnt5a	7.38691
72	4.48351e-08	GO:0007154	cell communication	gfra4,vax2,dctn1,rab11fip5,fgfr3,atoh8,fgfbp2,rab28,clnk,stk32b,evc,afap1,sorcs2,slit2,arap2,fat1,sorbs2,slc25a4,cdkn2aip,hpgd,fbxo8,npy5r,sfrp2,nr3c2,ednra,pgrmc2,spry1,egf,alpk1,ank2,tacr3,ppp3ca,tspan5,unc5c,snca,ptprs,rest,lpl,dusp4,cfd,ptpn13,anxa3,fras1,ugcg,dgkq,musk,slc24a2,klf4,mtap,c9orf72,ptprd,dmrt3,pcsk5,cdc14b,cntnap4,gadd45g,myh6,lif,slc8b1,apc,camk4,fbxl17,rab36,stx2,xbp1,fbn2,sem…	7.34838
73	4.67747e-08	GO:0051240	positive regulation of multicellular organismal process	atoh8,prom1,slit2,sfrp2,spry1,egf,tacr3,ppp3ca,enam,rest,lpl,anxa3,klf4,ptprd,dmrt2,gadd45g,lif,apc,xbp1,fbn2,sema6a,otp,enc1,foxd1,cartpt,mef2c,plk2,isl1,ghr,prkaa1,gdnf,prlr,tcf4,smad2,zbtb20,igsf11,gja5,dscam,runx1,robo1,plxna2,kiss1,mapkapk2,rap1a,mapk13,notch1,tbx2,slitrk1,htr2a,vdr,fgf9,pdgfd,tenm4,p2ry2,sytl2,wnt11,csf1r,msx2,cntn1,reln,sema3a,scamp5,znf703,egr3,dvl2,adm,pax6,il34,cyr61,lp…	7.32999
74	6.06994e-08	GO:0007409	axonogenesis	gfra4,vax2,slit2,unc5c,ptprs,c9orf72,wdr36,sema6a,foxd1,isl1,gdnf,dscam,epha6,robo1,plxna2,notch1,auts2,slitrk1,tsku,csf1r,reln,sema3a,lingo1,ephb4,lrrc4c,pax6,siah1,lpar3,cdh11,sema3f,fezf2,enah,nrp1,bcl2,gli3,cdh2,ext1,gfra1,fgfr2,zfyve27,cxcl12,zswim8,robo3,l1cam,fgf13,ttc8,evl,crabp2,igsf9,nr4a2,zeb2,cxcr4,dok5,b4galt6,olfm1,eif4g2,boc,vax1,gli2,vegfa,wnt5a	7.21682
75	7.32641e-08	GO:0003151	outflow tract morphogenesis	npy5r,sfrp2,mef2c,isl1,gja5,robo1,notch1,tbx2,wnt11,msx2,dvl2,tgfb2,hey2,nrp1,fzd1,twist1,eya1,fgfr2,eng,vegfa,sox18,wnt5a	7.13511
76	7.84914e-08	GO:0050769	positive regulation of neurogenesis	slit2,rest,ptprd,lif,sema6a,otp,enc1,mef2c,tcf4,dscam,robo1,plxna2,rap1a,notch1,slitrk1,tenm4,cntn1,reln,sema3a,dvl2,pax6,il34,lpar3,negr1,nckipsd,cpne5,fezf2,prox1,bmp2,oprm1,bmp5,rims1,nlgn1,bcl6,ptk2b,xrcc2,nrp1,zeb1,fzd1,bcl2,gli3,bmp6,lyn,gdf6,zfyve27,cxcl12,shank1,l1cam,prkd1,crabp2,zeb2,cxcr4,csnk1d,ndrg4,syt4,eif4g2,dnm1l,xrcc5,gli2,vegfa,epo,wnt5a	7.10518
77	9.0856e-08	GO:0001822	kidney development	prom1,slit2,hpgd,dchs2,spry1,fras1,pcsk5,lif,foxd1,mef2c,gdnf,smad2,adamts1,notch1,pdgfd,wnt11,podxl,tmed10,rpgrip1l,sall1,tgfb2,prox1,bmp2,sim1,bcl2l11,wwtr1,osr1,nrp1,bcl2,gli3,bmp6,eya1,calb1,angpt1,has2,fgfr2,tsc1,fmn1,stat1,pkhd1,wnt7b,upk3a,gli2,vegfa	7.04165
78	1.08012e-07	GO:0048762	mesenchymal cell differentiation	sfrp2,ednra,spry1,fbxl17,sema6a,mef2c,isl1,gdnf,smad2,notch1,wnt11,msx2,sema3a,znf703,sema3f,tgfb2,bmp2,hey2,bmp5,wwtr1,osr1,nrp1,twist1,foxf2,bcl2,ldlrad4,hey1,has2,fgfr2,eng,stat1,pofut2,zeb2,snai1,olfm1,adam15,tcf7l2,wnt5a	6.96653
79	1.22918e-07	GO:0048568	embryonic organ development	vax2,pcsk5,lif,fbn2,mef2c,gdnf,mbd2,smad2,gja5,notch1,tbx2,col2a1,cdx2,fgf9,wnt11,dvl2,adm,alx4,pax6,cyr61,sall1,foxf1,tgfb2,prox1,hey2,bmp5,osr1,wnt9a,insig1,zeb1,twist1,syf2,foxf2,gli3,eya1,hey1,zfat,fgfr2,eng,slc44a4,satb2,krt19,hoxb1,hoxb2,hoxb4,snai1,mafb,ndrg4,gata4,wnt7b,tbx15,gli2,vegfa,wdr19,ccdc40,sox18,wnt5a	6.91038
80	1.30919e-07	GO:0009792	embryo development ending in birth or egg hatching	rbm46,sfrp2,ednra,dmrt2,pcsk5,myh6,lif,myo18b,mef2c,isl1,smad2,plxna2,notch1,pcdh8,col2a1,cdx2,fgf9,wnt11,cnot2,tjp1,dvl2,adm,alx4,pax6,cyr61,rpgrip1l,foxf1,tgfb2,prox1,bmp2,hey2,bcl2l11,bmp5,osr1,apob,wnt9a,xrcc2,zeb1,fzd1,twist1,syf2,gli3,eya1,hey1,angpt1,ext1,zfat,fgfr2,ski,tsc1,ar,lfng,satb2,acvr2a,zeb2,krt19,hoxb1,hoxb2,hoxb4,sall4,snai1,rxra,ctr9,pofut1,wnt7b,med21,tbx15,gli2,vegfa,sox6,wdr…	6.883
81	1.42649e-07	GO:0010604	positive regulation of macromolecule metabolic process	fgfr3,nkx1-1,ctbp1,atoh8,msantd1,ldb2,npy5r,rbm46,sfrp2,egf,ank2,tet2,ppp3ca,h2afz,snca,rest,anxa3,dgkq,musk,klf4,dmrt2,cdc14b,gadd45g,lif,apc,camk4,patz1,xbp1,foxd1,cartpt,mef2c,nr2f1,plk2,isl1,ghr,prkaa1,gdnf,prlr,rax,tcf4,smad2,ets2,erg,runx1,robo1,taok1,asb9,aatf,pou3f1,rspo1,kiss1,sox13,dstyk,dcaf6,mapkapk2,rap1a,notch1,nfyc,auts2,ndfip2,nufip1,gtf2f2,htr2a,vdr,hoxc13,cdx2,fgf9,pdgfd,wnt11,c…	6.84573
82	1.50199e-07	GO:0003206	cardiac chamber morphogenesis	slit2,npy5r,sfrp2,myh6,mef2c,isl1,gja5,adamts1,robo1,tnnt2,notch1,tbx2,wnt11,msx2,cyr61,foxf1,tgfb2,prox1,hey2,bmp5,nrp1,fzd1,hey1,fgfr2,eng,gata4,rxra,wnt5a	6.82333
83	1.8225e-07	GO:0003231	cardiac ventricle development	slit2,npy5r,sfrp2,myh6,mef2c,isl1,gja5,robo1,tnnt2,notch1,ap2b1,wnt11,cyr61,sall1,foxf1,tgfb2,prox1,hey2,naca,fzd1,hey1,fgfr2,eng,sall4,myocd,gata4,rxra,wnt5a	6.73933
84	1.85696e-07	GO:0035239	tube morphogenesis	atoh8,slit2,hpgd,sfrp2,ednra,spry1,egf,anxa3,klf4,myo18b,xbp1,sema6a,foxd1,mef2c,plk2,isl1,gdnf,adamts12,tcf4,smad2,gja5,runx1,robo1,rap1a,notch1,tbx2,col4a1,vdr,fgf9,wnt11,csf1r,msx2,podxl,egr3,dvl2,ephb4,adm,cyr61,sall1,cdh5,cdh13,foxf1,s1pr1,adamts9,tgfb2,prox1,bmp2,hey2,bcl2l11,bmp5,osr1,apob,ptk2b,nrp1,zeb1,fzd1,twist1,hdac9,bcl2,gli3,cdh2,eya1,hey1,rspo2,angpt1,has2,fgfr2,ski,eng,tsc1,ar,fm…	6.7312
85	2.05346e-07	GO:0001501	skeletal system development	fgfr3,evc,sfrp2,ncan,dmrt2,pcsk5,fbn2,mef2c,ghr,adamts12,mex3c,dym,smad2,gja5,ets2,col2a1,vdr,fgf9,wnt11,pitx1,msx2,alx4,cd44,cyr61,cdh11,pappa2,tgfb2,bmp2,bmp5,mcph1,osr1,wnt9a,pth1r,insig1,zeb1,twist1,gli3,bmp6,eya1,gdf6,rspo2,ext1,has2,fgfr2,ski,eng,fmn1,satb2,hdac4,acvr2a,hoxb1,hoxb2,hoxb4,snai1,wdr5,sox5,wnt7b,thra,tbx15,gli2,sox6,wdr19,col11a2,wnt5a	6.68751
86	2.70528e-07	GO:0035108	limb morphogenesis	sfrp2,fras1,pcsk5,fbn2,gja5,plxna2,notch1,tbx2,col2a1,fgf9,pitx1,msx2,alx4,rpgrip1l,sall1,tgfb2,bcl2l11,osr1,wnt9a,twist1,gli3,rspo2,fgfr2,ski,fmn1,crabp2,sall4,gli2,wdr19,wnt5a	6.56779
87	2.70528e-07	GO:0035107	appendage morphogenesis	sfrp2,fras1,pcsk5,fbn2,gja5,plxna2,notch1,tbx2,col2a1,fgf9,pitx1,msx2,alx4,rpgrip1l,sall1,tgfb2,bcl2l11,osr1,wnt9a,twist1,gli3,rspo2,fgfr2,ski,fmn1,crabp2,sall4,gli2,wdr19,wnt5a	6.56779
88	2.90251e-07	GO:0030900	forebrain development	vax2,slit2,ptprs,anxa3,otp,isl1,rax,robo1,rtn4rl1,nr0b1,pou3f1,srgap2,notch1,tsku,csf1r,pitx1,drd1,reln,sema3a,slc1a2,pax6,rpgrip1l,sall1,fezf2,prox1,bmp2,btbd3,mcph1,htr5a,nrp1,dnah5,gli3,cdh2,ext1,trappc9,fgfr2,crtac1,cxcl12,ski,tsc1,fgf13,ttc8,satb2,nr4a2,zeb2,cxcr4,sstr2,slc32a1,wnt7b,kcnc1,gli2,emx2,wnt5a	6.53723
89	4.18526e-07	GO:0000904	cell morphogenesis involved in differentiation	gfra4,vax2,slit2,fat1,ppp3ca,unc5c,ptprs,c9orf72,ptprd,wdr36,sema6a,foxd1,mef2c,isl1,slc1a3,gdnf,skor2,dscam,epha6,robo1,plxna2,srgap2,notch1,auts2,slitrk1,tsku,csf1r,reln,sema3a,lingo1,ephb4,lrrc4c,pax6,siah1,lpar3,cdh11,sema3f,fezf2,enah,prox1,btbd3,bves,nlgn1,dock10,nrp1,bcl2,gli3,cdh2,ext1,has2,gfra1,fgfr2,zfyve27,cxcl12,zswim8,robo3,vamp3,shank1,l1cam,ar,fgf13,ttc8,evl,crabp2,igsf9,nr4a2,zeb…	6.37828
90	4.39655e-07	GO:0009893	positive regulation of metabolic process	fgfr3,nkx1-1,ctbp1,atoh8,msantd1,ldb2,npy5r,rbm46,sfrp2,egf,ank2,tet2,ppp3ca,h2afz,snca,rest,anxa3,dgkq,musk,klf4,c9orf72,dmrt2,cdc14b,gadd45g,lif,apc,camk4,patz1,xbp1,foxd1,cartpt,mef2c,nr2f1,plk2,isl1,ghr,prkaa1,gdnf,prlr,rax,tcf4,smad2,zbtb20,dscam,ets2,erg,runx1,robo1,taok1,asb9,aatf,fabp3,pou3f1,rspo1,kiss1,sox13,dstyk,dcaf6,mapkapk2,rap1a,notch1,nfyc,auts2,ndfip2,nufip1,gtf2f2,htr2a,vdr,hox…	6.35689
91	6.91309e-07	GO:0003279	cardiac septum development	slit2,ank2,pcsk5,isl1,gja5,robo1,notch1,tbx2,ap2b1,wnt11,msx2,cyr61,sall1,tgfb2,prox1,hey2,bmp5,nrp1,fzd1,hey1,fgfr2,eng,sall4,gata4,wnt5a	6.16033
92	7.85491e-07	GO:0060560	developmental growth involved in morphogenesis	slit2,sfrp2,spry1,ptprs,c9orf72,wdr36,sema6a,dscam,notch1,tbx2,auts2,wnt11,sema3a,lpar3,flrt1,sall1,s1pr1,sema3f,cpne5,rims1,nrp1,nrn1,fgfr2,zfyve27,cxcl12,l1cam,fgf13,eif2ak4,fmn1,crabp2,zeb2,cxcr4,syt4,olfm1,eif4g2,wnt7b,vegfa,wnt5a	6.10486
93	8.7022e-07	GO:0051962	positive regulation of nervous system development	slit2,egf,rest,ptprd,lif,sema6a,otp,enc1,mef2c,tcf4,dscam,robo1,plxna2,rap1a,notch1,slitrk1,tenm4,cntn1,reln,sema3a,dvl2,pax6,il34,lpar3,flrt1,negr1,nckipsd,cpne5,fezf2,prox1,bmp2,oprm1,bmp5,rims1,nlgn1,bcl6,ptk2b,xrcc2,nrp1,zeb1,fzd1,bcl2,gli3,bmp6,lyn,gdf6,zfyve27,cxcl12,shank1,l1cam,prkd1,crabp2,itgax,zeb2,cxcr4,csnk1d,ndrg4,syt4,eif4g2,dnm1l,xrcc5,gli2,vegfa,epo,wnt5a	6.06037
94	9.33668e-07	GO:0031325	positive regulation of cellular metabolic process	fgfr3,nkx1-1,ctbp1,atoh8,msantd1,ldb2,npy5r,sfrp2,egf,tet2,ppp3ca,h2afz,snca,rest,anxa3,dgkq,musk,klf4,c9orf72,dmrt2,cdc14b,gadd45g,lif,camk4,patz1,xbp1,foxd1,cartpt,mef2c,nr2f1,plk2,isl1,ghr,prkaa1,gdnf,prlr,rax,tcf4,smad2,zbtb20,dscam,ets2,erg,runx1,robo1,taok1,aatf,fabp3,pou3f1,rspo1,kiss1,sox13,dstyk,dcaf6,mapkapk2,rap1a,notch1,nfyc,auts2,ndfip2,nufip1,gtf2f2,htr2a,vdr,hoxc13,cdx2,fgf9,pdgfd,…	6.02981
95	9.85113e-07	GO:1903508	positive regulation of nucleic acid-templated transcription	nkx1-1,atoh8,msantd1,ldb2,sfrp2,egf,tet2,ppp3ca,h2afz,rest,klf4,dmrt2,lif,camk4,patz1,xbp1,foxd1,mef2c,nr2f1,isl1,prkaa1,gdnf,rax,tcf4,smad2,ets2,erg,runx1,aatf,pou3f1,sox13,dcaf6,notch1,nfyc,auts2,nufip1,gtf2f2,vdr,hoxc13,cdx2,wnt11,pitx1,egr3,dvl2,alx4,trim44,pax6,cyr61,sall1,cdh13,foxf1,s1pr1,fezf2,tgfb2,prox1,bmp2,tbpl1,arid1b,hey2,vgll2,foxo3,phip,cga,bmp5,wwtr1,tfdp2,myt1l,osr1,naca,insig1,…	6.00651
96	1.02745e-06	GO:1902680	positive regulation of RNA biosynthetic process	nkx1-1,atoh8,msantd1,ldb2,sfrp2,egf,tet2,ppp3ca,h2afz,rest,klf4,dmrt2,lif,camk4,patz1,xbp1,foxd1,mef2c,nr2f1,isl1,prkaa1,gdnf,rax,tcf4,smad2,ets2,erg,runx1,aatf,pou3f1,sox13,dcaf6,notch1,nfyc,auts2,nufip1,gtf2f2,vdr,hoxc13,cdx2,wnt11,pitx1,egr3,dvl2,alx4,trim44,pax6,cyr61,sall1,cdh13,foxf1,s1pr1,fezf2,tgfb2,prox1,bmp2,tbpl1,arid1b,hey2,vgll2,foxo3,phip,cga,bmp5,wwtr1,tfdp2,myt1l,osr1,naca,insig1,…	5.98824
97	1.14305e-06	GO:0022603	regulation of anatomical structure morphogenesis	slit2,sfrp2,spry1,ppp3ca,enam,ptprs,anxa3,klf4,ptprd,dmrt2,dmrt3,lif,wdr36,xbp1,sema6a,mef2c,plk2,isl1,gdnf,adamts12,tcf4,skor2,dscam,runx1,robo1,plxna2,rap1a,notch1,tbx2,ap2b1,gpc6,slitrk1,vdr,cdx2,tenm4,wnt11,csf1r,reln,sema3a,lingo1,dvl2,adm,lrrc4c,cd44,lpar3,cdh5,ror1,sema3f,cpne5,adamts9,prickle2,psmd6,fezf2,tgfb2,prox1,bmp2,hey2,bves,phip,rims1,nlgn1,bcl6,osr1,ptk2b,naca,nrp1,fzd1,twist1,hd…	5.94193
98	1.15458e-06	GO:0120035	regulation of plasma membrane bounded cell projection organization	slit2,cep135,sfrp2,ppp3ca,ptprs,klf4,ptprd,inpp5j,apc,wdr36,sema6a,enc1,mef2c,nr2f1,plk2,skor2,dscam,robo1,rtn4rl1,plxna2,rap1a,auts2,slitrk1,cntn1,reln,sema3a,podxl,lingo1,dvl2,lrrc4c,cd44,lpar3,negr1,sema3f,nckipsd,cpne5,fezf2,bmp5,rims1,nlgn1,pls1,ptk2b,nrp1,fzd1,myo10,cdh2,lyn,asap1,zfyve27,cxcl12,zswim8,shank1,tsc1,l1cam,fgf13,evl,prkd1,crabp2,stx1b,hdac4,zeb2,cxcr4,srcin1,ndrg4,sept9,pmp22,…	5.93757
99	1.24409e-06	GO:0071840	cellular component organization or biogenesis	gfra4,vax2,dctn1,maea,ctbp1,rnf212,ldb2,afap1,grpel1,slit2,cep135,sgcz,frg1,fat1,sorbs2,slc25a4,cdkn2aip,sfrp2,mnd1,prmt9,spry1,kiaa1109,egf,ank2,mad2l1,prdm5,tet2,ppp3ca,h2afz,unc5c,snca,enam,ptprs,rest,lpl,abhd17a,sept11,ugcg,tomm5,dgkq,ncan,musk,klf4,c9orf72,ptprd,cdc14b,myh6,ngdn,inpp5j,lif,apc,wdr36,stx2,clip1,fbn2,hsd17b4,sema6a,tbca,enc1,foxd1,marveld2,rps23,mef2c,nr2f1,chd1,plk2,isl1,hcn1…	5.90515
100	1.26031e-06	GO:0007166	cell surface receptor signaling pathway	gfra4,vax2,fgfr3,atoh8,clnk,evc,slit2,sorbs2,hpgd,sfrp2,spry1,egf,ppp3ca,tspan5,unc5c,snca,cfd,anxa3,ugcg,dgkq,musk,klf4,mtap,ptprd,myh6,lif,apc,fbxl17,fbn2,sema6a,foxd1,mef2c,lnpep,cd180,isl1,ghr,prkaa1,gdnf,prlr,adamts12,tcf4,mbd2,smad2,skor2,igsf11,dscam,runx1,adamts1,epha6,robo1,plxna2,ptpru,rspo1,dstyk,mapkapk2,rap1a,anks1a,notch1,tbx2,ap2b1,col4a1,gpc6,gtf2f2,col2a1,amer2,fgf9,gria4,pdgfd,p…	5.89952
101	1.30981e-06	GO:0040007	growth	fgfr3,evc,slit2,sorbs2,cdkn2aip,sfrp2,spry1,kiaa1109,ppp3ca,ptprs,musk,c9orf72,myh6,wdr36,sema6a,mef2c,ghr,mex3c,smad2,igsf11,dscam,st7l,notch1,tbx2,auts2,slitrk1,fgf9,tenm4,wnt11,msx2,sema3a,adm,slc1a2,lpar3,flrt1,osgin1,sall1,pappa2,s1pr1,sema3f,cpne5,tgfb2,prox1,hey2,bcl2l11,foxo3,cga,rims1,bcl6,pls1,wwtr1,ptk2b,naca,xrcc2,nrp1,adnp2,nrn1,bcl2,gli3,rspo2,fgfr2,kazald1,zfyve27,cxcl12,ei24,shank…	5.88279
102	1.55472e-06	GO:0060173	limb development	sfrp2,fras1,pcsk5,fbn2,rax,gja5,plxna2,notch1,tbx2,col2a1,hoxc13,fgf9,pitx1,msx2,alx4,rpgrip1l,sall1,tgfb2,bcl2l11,osr1,wnt9a,twist1,gli3,rspo2,fgfr2,ski,fmn1,crabp2,sall4,gli2,wdr19,wnt5a	5.80835
103	1.55472e-06	GO:0048736	appendage development	sfrp2,fras1,pcsk5,fbn2,rax,gja5,plxna2,notch1,tbx2,col2a1,hoxc13,fgf9,pitx1,msx2,alx4,rpgrip1l,sall1,tgfb2,bcl2l11,osr1,wnt9a,twist1,gli3,rspo2,fgfr2,ski,fmn1,crabp2,sall4,gli2,wdr19,wnt5a	5.80835
104	1.6199e-06	GO:0045666	positive regulation of neuron differentiation	slit2,rest,ptprd,enc1,mef2c,tcf4,dscam,robo1,plxna2,rap1a,slitrk1,cntn1,reln,dvl2,lpar3,negr1,nckipsd,cpne5,fezf2,prox1,bmp2,bmp5,rims1,nlgn1,bcl6,ptk2b,nrp1,zeb1,fzd1,bcl2,bmp6,lyn,gdf6,zfyve27,cxcl12,shank1,l1cam,prkd1,crabp2,zeb2,cxcr4,csnk1d,ndrg4,syt4,eif4g2,dnm1l,gli2,vegfa,epo,wnt5a	5.79051
105	1.74693e-06	GO:0060411	cardiac septum morphogenesis	slit2,isl1,gja5,robo1,notch1,tbx2,wnt11,msx2,cyr61,tgfb2,prox1,hey2,bmp5,nrp1,fzd1,hey1,fgfr2,eng,gata4,wnt5a	5.75772
106	2.14589e-06	GO:0016043	cellular component organization	gfra4,vax2,dctn1,maea,ctbp1,rnf212,afap1,grpel1,slit2,cep135,sgcz,fat1,sorbs2,slc25a4,cdkn2aip,sfrp2,mnd1,prmt9,spry1,kiaa1109,egf,ank2,mad2l1,prdm5,tet2,ppp3ca,h2afz,unc5c,snca,enam,ptprs,rest,lpl,abhd17a,sept11,ugcg,tomm5,dgkq,ncan,musk,klf4,c9orf72,ptprd,cdc14b,myh6,inpp5j,lif,apc,wdr36,stx2,clip1,fbn2,hsd17b4,sema6a,tbca,enc1,foxd1,marveld2,rps23,mef2c,nr2f1,chd1,plk2,isl1,hcn1,mrps30,prkaa1,…	5.66839
107	2.23607e-06	GO:0031344	regulation of cell projection organization	slit2,cep135,sfrp2,ppp3ca,ptprs,klf4,ptprd,inpp5j,apc,wdr36,sema6a,enc1,mef2c,nr2f1,plk2,skor2,dscam,robo1,rtn4rl1,plxna2,rap1a,auts2,slitrk1,cntn1,reln,sema3a,podxl,lingo1,dvl2,lrrc4c,cd44,lpar3,negr1,sema3f,nckipsd,cpne5,fezf2,bmp5,rims1,nlgn1,pls1,ptk2b,nrp1,fzd1,myo10,cdh2,lyn,asap1,zfyve27,cxcl12,zswim8,shank1,tsc1,l1cam,fgf13,evl,prkd1,crabp2,stx1b,hdac4,zeb2,cxcr4,srcin1,ndrg4,sept9,pmp22,…	5.65052
108	2.27818e-06	GO:0010720	positive regulation of cell development	slit2,rest,ptprd,lif,sema6a,otp,enc1,mef2c,tcf4,dscam,robo1,plxna2,rap1a,notch1,slitrk1,tenm4,cntn1,reln,sema3a,dvl2,pax6,il34,lpar3,cdh5,negr1,nckipsd,cpne5,fezf2,prox1,bmp2,oprm1,bmp5,rims1,nlgn1,bcl6,ptk2b,xrcc2,nrp1,zeb1,fzd1,bcl2,gli3,bmp6,lyn,gdf6,has2,zfyve27,cxcl12,shank1,l1cam,prkd1,crabp2,zeb2,cxcr4,csnk1d,ndrg4,syt4,eif4g2,dnm1l,cspg5,xrcc5,gli2,vegfa,epo,wnt5a	5.64241
109	2.98698e-06	GO:0031328	positive regulation of cellular biosynthetic process	nkx1-1,atoh8,msantd1,ldb2,sfrp2,egf,tet2,ppp3ca,h2afz,snca,rest,klf4,dmrt2,lif,camk4,patz1,xbp1,foxd1,mef2c,nr2f1,isl1,prkaa1,gdnf,rax,tcf4,smad2,ets2,erg,runx1,aatf,fabp3,pou3f1,sox13,dcaf6,mapkapk2,notch1,nfyc,auts2,nufip1,gtf2f2,htr2a,vdr,hoxc13,cdx2,rab38,wnt11,pitx1,egr3,dvl2,adm,alx4,trim44,pax6,cyr61,sall1,cdh13,foxf1,cdc7,s1pr1,fezf2,tgfb2,prox1,bmp2,tbpl1,arid1b,hey2,vgll2,foxo3,phip,cga…	5.52477
110	3.15998e-06	GO:0050794	regulation of cellular process	gfra4,tex261,vax2,dctn1,rab11fip5,fgfr3,nkx1-1,maea,ctbp1,atoh8,msantd1,ldb2,prom1,rab28,clnk,stk32b,evc,afap1,sorcs2,sepsecs,slit2,arap2,cep135,sorbs2,slc25a4,cdkn2aip,hpgd,fbxo8,npy5r,rbm46,sfrp2,nr3c2,prmt9,ednra,pgrmc2,spry1,kiaa1109,egf,alpk1,ank2,mad2l1,prdm5,tet2,tacr3,ppp3ca,h2afz,tspan5,unc5c,snca,enam,ptprs,rest,lpl,dusp4,abhd17a,cfd,ptpn13,anxa3,sept11,ugcg,dgkq,musk,slc24a2,klf4,mtap,…	5.50032
111	3.20666e-06	GO:0051173	positive regulation of nitrogen compound metabolic process	fgfr3,nkx1-1,ctbp1,atoh8,msantd1,ldb2,npy5r,sfrp2,egf,tet2,ppp3ca,h2afz,snca,rest,anxa3,dgkq,musk,klf4,dmrt2,cdc14b,gadd45g,lif,apc,camk4,patz1,xbp1,foxd1,cartpt,mef2c,nr2f1,plk2,isl1,ghr,prkaa1,gdnf,prlr,rax,tcf4,smad2,zbtb20,ets2,erg,runx1,robo1,taok1,asb9,aatf,pou3f1,rspo1,kiss1,sox13,dstyk,dcaf6,mapkapk2,rap1a,notch1,nfyc,auts2,ndfip2,nufip1,gtf2f2,htr2a,vdr,hoxc13,cdx2,fgf9,pdgfd,rab38,wnt11…	5.49395
112	3.50578e-06	GO:0009966	regulation of signal transduction	fgfr3,clnk,evc,afap1,slit2,arap2,cdkn2aip,fbxo8,npy5r,sfrp2,nr3c2,spry1,egf,alpk1,tspan5,snca,ptprs,dusp4,ptpn13,anxa3,ugcg,dgkq,klf4,c9orf72,gadd45g,lif,apc,fbxl17,xbp1,fbn2,sema6a,foxd1,cartpt,mef2c,cd180,plk2,isl1,ghr,prkaa1,gdnf,prlr,adamts12,tcf4,mbd2,smad2,skor2,arhgap31,igsf11,sh3bgr,runx1,robo1,taok1,rpa1,nr0b1,ppef1,ptpru,rspo1,kiss1,dstyk,srgap2,mapkapk2,rap1a,anks1a,notch1,rph3al,auts2…	5.45522
113	4.8308e-06	GO:0009952	anterior/posterior pattern specification	sfrp2,dmrt2,pcsk5,smad2,ets2,plxna2,notch1,pcdh8,hoxc13,cdx2,msx2,pcsk6,alx4,pax6,foxf1,fezf2,bmp2,hey2,osr1,xrcc2,gli3,hey1,ski,lfng,acvr2a,zeb2,hoxb1,hoxb2,hoxb4,gata4,pofut1,barx1,gli2,emx2,wnt5a	5.31598
114	5.40824e-06	GO:0060317	cardiac epithelial to mesenchymal transition	spry1,notch1,msx2,tgfb2,bmp2,hey2,twist1,hey1,has2,eng,snai1,olfm1,adam15	5.26694
115	5.9994e-06	GO:0071310	cellular response to organic substance	dctn1,rab11fip5,fgfr3,slit2,hpgd,sfrp2,nr3c2,pgrmc2,spry1,prdm5,ppp3ca,h2afz,snca,rest,lpl,ptpn13,ugcg,klf4,mtap,myh6,lif,apc,xbp1,fbn2,sema6a,foxd1,mef2c,nr2f1,cd180,htr1a,isl1,hcn1,ghr,prkaa1,prlr,adamts12,tcf4,mbd2,smad2,skor2,zbtb20,runx1,htr1f,robo1,nr0b1,laptm5,dstyk,mapkapk2,rap1a,slc16a1,mapk13,notch1,col4a1,gtf2f2,htr2a,shmt2,col2a1,vdr,ufm1,fgf9,fdx1,pdgfd,p2ry2,wnt11,csf1r,gabra1,gfpt2…	5.22189
116	6.20198e-06	GO:0009891	positive regulation of biosynthetic process	nkx1-1,atoh8,msantd1,ldb2,sfrp2,egf,tet2,ppp3ca,h2afz,snca,rest,klf4,dmrt2,lif,camk4,patz1,xbp1,foxd1,mef2c,nr2f1,isl1,prkaa1,gdnf,rax,tcf4,smad2,zbtb20,ets2,erg,runx1,aatf,fabp3,pou3f1,sox13,dcaf6,mapkapk2,notch1,nfyc,auts2,nufip1,gtf2f2,htr2a,vdr,hoxc13,cdx2,rab38,wnt11,pitx1,egr3,dvl2,adm,alx4,trim44,pax6,cyr61,sall1,cdh13,foxf1,cdc7,s1pr1,fezf2,tgfb2,prox1,bmp2,tbpl1,arid1b,hey2,vgll2,foxo3,p…	5.20747
117	6.24868e-06	GO:0010557	positive regulation of macromolecule biosynthetic process	nkx1-1,atoh8,msantd1,ldb2,sfrp2,egf,tet2,ppp3ca,h2afz,rest,klf4,dmrt2,lif,camk4,patz1,xbp1,foxd1,mef2c,nr2f1,isl1,prkaa1,gdnf,rax,tcf4,smad2,ets2,erg,runx1,aatf,pou3f1,sox13,dcaf6,mapkapk2,notch1,nfyc,auts2,nufip1,gtf2f2,vdr,hoxc13,cdx2,wnt11,pitx1,egr3,dvl2,alx4,trim44,pax6,cyr61,sall1,cdh13,foxf1,cdc7,s1pr1,fezf2,tgfb2,prox1,bmp2,tbpl1,arid1b,hey2,vgll2,foxo3,phip,cga,bmp5,larp4b,wwtr1,tfdp2,my…	5.20421
118	6.67504e-06	GO:0045165	cell fate commitment	sfrp2,klf4,dmrt3,apc,mef2c,isl1,smad2,ets2,olig1,sox13,notch1,tbx2,tenm4,wnt11,pitx1,pax6,fezf2,prox1,bmp2,hey2,myt1l,wnt9a,nrp1,bcl2,gli3,eya1,fgfr2,ar,fgf13,satb2,eya2,ctr9,sox5,wnt7b,gli2,sox6,tcf7l2,sox18,wnt5a	5.17555
119	7.17459e-06	GO:0060537	muscle tissue development	sgcz,sorbs2,ppp3ca,myh6,myo18b,mef2c,isl1,prkaa1,gja5,tnnt2,notch1,tbx2,fgf9,tenm4,pitx1,csrp2,s1pr1,adamts9,tgfb2,prox1,bmp2,hey2,vgll2,bves,bmp5,osr1,naca,svil,twist1,hdac9,bcl2,eya1,msc,fgfr2,ski,eng,tsc1,actc1,casq1,rbfox1,hdac4,eya2,ndrg4,myocd,gata4,rxra,csrp3,vax1,vegfa,sox6,nrap,wnt5a	5.1442
120	7.22824e-06	GO:0007155	cell adhesion	maea,fat1,dchs2,sfrp2,pcdh18,pcdh10,ppp3ca,ptprs,anxa3,gne,ncan,klf4,mpdz,ptprd,cntnap4,apc,xbp1,sema6a,adamts12,lsamp,igsf11,dscam,runx1,ncam2,robo1,plxna2,aatf,ptpru,srgap2,notch1,vmp1,slitrk1,pcdh9,pcdh17,pcdh8,tenm4,nuak1,ppfia2,cntn1,reln,podxl,trpm7,znf703,itga11,egr3,cd97,ephb4,lrrc4c,cd44,spon1,cyr61,flrt1,cdh11,cdh5,cdh13,foxf1,negr1,s1pr1,adamts9,tgfb2,cd93,bmp2,bcl2l11,bves,bmp5,nlgn1,…	5.14097
121	7.50581e-06	GO:0060021	roof of mouth development	fras1,mef2c,smad2,tbx2,col2a1,wnt11,alx4,tgfb2,osr1,insig1,fzd1,twist1,foxf2,gli3,msc,ski,satb2,snai1,vax1,col11a2,wnt5a	5.1246
122	8.00092e-06	GO:0003197	endocardial cushion development	isl1,robo1,notch1,tbx2,msx2,foxf1,tgfb2,bmp2,hey2,bmp5,twist1,hey1,eng,snai1,gata4	5.09686
123	9.03046e-06	GO:0003179	heart valve morphogenesis	slit2,mef2c,gja5,robo1,notch1,cyr61,adamts9,tgfb2,bmp2,hey2,twist1,hey1,snai1,gata4,olfm1,emilin1	5.04429
124	9.39918e-06	GO:0051254	positive regulation of RNA metabolic process	nkx1-1,atoh8,msantd1,ldb2,sfrp2,egf,tet2,ppp3ca,h2afz,rest,klf4,dmrt2,lif,camk4,patz1,xbp1,foxd1,mef2c,nr2f1,isl1,prkaa1,gdnf,rax,tcf4,smad2,ets2,erg,runx1,aatf,pou3f1,sox13,dcaf6,notch1,nfyc,auts2,nufip1,gtf2f2,vdr,hoxc13,cdx2,wnt11,pitx1,egr3,dvl2,alx4,trim44,pax6,cyr61,sall1,cdh13,foxf1,s1pr1,fezf2,tgfb2,prox1,bmp2,tbpl1,arid1b,hey2,vgll2,foxo3,phip,cga,bmp5,wwtr1,tfdp2,myt1l,osr1,naca,insig1,…	5.02691
125	9.70593e-06	GO:0022610	biological adhesion	maea,fat1,dchs2,sfrp2,pcdh18,pcdh10,ppp3ca,ptprs,anxa3,gne,ncan,klf4,mpdz,ptprd,cntnap4,apc,xbp1,sema6a,adamts12,lsamp,igsf11,dscam,runx1,ncam2,robo1,plxna2,aatf,ptpru,srgap2,notch1,vmp1,slitrk1,pcdh9,pcdh17,pcdh8,tenm4,nuak1,ppfia2,cntn1,reln,podxl,trpm7,znf703,itga11,egr3,cd97,ephb4,lrrc4c,cd44,spon1,cyr61,flrt1,cdh11,cdh5,cdh13,foxf1,negr1,s1pr1,adamts9,tgfb2,cd93,bmp2,bcl2l11,bves,bmp5,nlgn1,…	5.01296
126	1.23668e-05	GO:0014706	striated muscle tissue development	sgcz,sorbs2,ppp3ca,myh6,myo18b,mef2c,isl1,prkaa1,gja5,tnnt2,notch1,tbx2,fgf9,tenm4,pitx1,s1pr1,adamts9,tgfb2,prox1,bmp2,hey2,vgll2,bves,bmp5,naca,svil,twist1,hdac9,bcl2,eya1,msc,fgfr2,ski,eng,tsc1,actc1,casq1,rbfox1,hdac4,eya2,ndrg4,myocd,gata4,rxra,csrp3,vax1,vegfa,sox6,nrap,wnt5a	4.90774
127	1.29769e-05	GO:0021537	telencephalon development	slit2,ptprs,anxa3,robo1,rtn4rl1,srgap2,tsku,csf1r,drd1,reln,sema3a,slc1a2,pax6,rpgrip1l,sall1,fezf2,prox1,bmp2,btbd3,mcph1,htr5a,nrp1,dnah5,gli3,cdh2,ext1,trappc9,crtac1,cxcl12,ski,tsc1,fgf13,ttc8,zeb2,cxcr4,slc32a1,emx2,wnt5a	4.88683
128	1.35879e-05	GO:0035113	embryonic appendage morphogenesis	sfrp2,fras1,fbn2,gja5,notch1,tbx2,fgf9,pitx1,msx2,alx4,rpgrip1l,sall1,tgfb2,bcl2l11,osr1,wnt9a,twist1,gli3,rspo2,ski,crabp2,sall4,gli2,wdr19,wnt5a	4.86685
129	1.35879e-05	GO:0030326	embryonic limb morphogenesis	sfrp2,fras1,fbn2,gja5,notch1,tbx2,fgf9,pitx1,msx2,alx4,rpgrip1l,sall1,tgfb2,bcl2l11,osr1,wnt9a,twist1,gli3,rspo2,ski,crabp2,sall4,gli2,wdr19,wnt5a	4.86685
130	1.43549e-05	GO:0023056	positive regulation of signaling	fgfr3,clnk,evc,cdkn2aip,npy5r,sfrp2,nr3c2,egf,alpk1,tspan5,snca,slc24a2,gadd45g,lif,xbp1,foxd1,cartpt,mef2c,cd180,plk2,isl1,ghr,prkaa1,slc1a3,prlr,mbd2,smad2,skor2,igsf11,sh3bgr,robo1,taok1,rspo1,kiss1,dstyk,mapkapk2,rap1a,itpr3,notch1,rims3,rph3al,auts2,ndfip2,htr2a,fgf9,gucy1a2,pdgfd,wnt11,csf1r,sh3rf2,drd1,msx2,reln,sema3a,dvl2,trim44,cd44,ano1,siah1,cyr61,lpar3,sall1,cdh13,ror1,arl6ip5,psmd6,…	4.843
131	1.99103e-05	GO:0003203	endocardial cushion morphogenesis	isl1,robo1,notch1,tbx2,msx2,tgfb2,bmp2,hey2,bmp5,twist1,hey1,eng,snai1	4.70092
132	2.05077e-05	GO:0010647	positive regulation of cell communication	fgfr3,clnk,evc,cdkn2aip,npy5r,sfrp2,nr3c2,egf,alpk1,tspan5,snca,slc24a2,gadd45g,lif,xbp1,foxd1,cartpt,mef2c,cd180,plk2,isl1,ghr,prkaa1,slc1a3,prlr,mbd2,smad2,skor2,igsf11,gja5,sh3bgr,robo1,taok1,rspo1,kiss1,dstyk,mapkapk2,rap1a,itpr3,notch1,rims3,rph3al,auts2,ndfip2,htr2a,fgf9,gucy1a2,pdgfd,wnt11,csf1r,sh3rf2,drd1,msx2,reln,sema3a,dvl2,trim44,cd44,ano1,siah1,cyr61,lpar3,sall1,cdh13,ror1,arl6ip5,p…	4.68808
133	2.18157e-05	GO:0009719	response to endogenous stimulus	fgfr3,slit2,hpgd,sfrp2,nr3c2,pgrmc2,spry1,tacr3,h2afz,snca,rest,lpl,anxa3,ugcg,klf4,myh6,apc,xbp1,fbn2,foxd1,mef2c,nr2f1,htr1a,isl1,hcn1,ghr,prkaa1,prlr,adamts12,mbd2,smad2,skor2,runx1,htr1f,nr0b1,fabp3,ptpru,dstyk,rap1a,mapk13,notch1,col4a1,gtf2f2,htr2a,shmt2,col2a1,vdr,ufm1,fgf9,fdx1,pdgfd,p2ry2,gabra1,drd1,msx2,cnot2,cacna2d1,acsbg1,aqp9,pcsk6,znf703,egr3,adm,cd44,cyr61,flrt1,adcy7,cdh5,cdh13,…	4.66123
134	2.21003e-05	GO:0010033	response to organic substance	dctn1,rab11fip5,fgfr3,dhx15,slit2,hpgd,sfrp2,nr3c2,pgrmc2,spry1,ank2,prdm5,tet2,tacr3,ppp3ca,h2afz,snca,rest,lpl,ptpn13,anxa3,ugcg,dgkq,klf4,mtap,myh6,lif,apc,xbp1,fbn2,sema6a,foxd1,mef2c,nr2f1,cd180,htr1a,isl1,hcn1,ghr,prkaa1,prlr,adamts12,tcf4,mbd2,smad2,skor2,zbtb20,ildr2,runx1,htr1f,robo1,nr0b1,fabp3,laptm5,ptpru,dstyk,mapkapk2,rap1a,slc16a1,mapk13,notch1,col4a1,gtf2f2,htr2a,shmt2,col2a1,vdr,…	4.6556
135	2.42873e-05	GO:0051216	cartilage development	fgfr3,evc,sfrp2,mef2c,ghr,adamts12,mex3c,col2a1,fgf9,wnt11,pitx1,msx2,cd44,cyr61,bmp2,bmp5,osr1,wnt9a,pth1r,zeb1,gli3,bmp6,gdf6,rspo2,satb2,snai1,sox5,wnt7b,thra,gli2,sox6,col11a2,wnt5a	4.61462
136	2.53621e-05	GO:0065008	regulation of biological quality	dctn1,rab11fip5,maea,ldb2,prom1,sorcs2,slit2,sgcz,slc25a4,cdkn2aip,rbm46,ednra,ank2,tacr3,ppp3ca,snca,ptprs,rest,lpl,abhd17a,sept11,ugcg,dgkq,musk,slc24a2,klf4,ptprd,pcsk5,gadd45g,myh6,lif,slc8b1,apc,wdr36,stx2,xbp1,fbn2,aldh7a1,hsd17b4,sema6a,foxd1,cartpt,mef2c,glrx,pcsk1,lnpep,htr1a,plk2,isl1,hcn1,ghr,prkaa1,slc1a3,gdnf,prlr,lman1,cplx4,txnl1,mex3c,smad2,zbtb20,igsf11,ildr2,gja5,dscam,taok1,rpa…	4.59581
137	3.05671e-05	GO:0007167	enzyme linked receptor protein signaling pathway	gfra4,fgfr3,atoh8,clnk,hpgd,sfrp2,spry1,egf,snca,dgkq,musk,ptprd,myh6,lif,apc,fbn2,sema6a,foxd1,lnpep,ghr,prkaa1,prlr,adamts12,tcf4,smad2,skor2,epha6,robo1,ptpru,dstyk,mapkapk2,anks1a,notch1,ap2b1,col4a1,gtf2f2,fgf9,pdgfd,csf1r,msx2,pcsk6,znf703,ephb4,cyr61,flrt1,cdh5,cdh13,ror1,tgfb2,bmp2,snx5,foxo3,phip,map3k7,gfral,bmp5,fgf12,wwtr1,ptk2b,nrp1,zeb1,fzd1,bmp6,ldlrad4,lyn,gdf6,angpt1,gfra1,cd4,fg…	4.51475
138	3.31597e-05	GO:0001837	epithelial to mesenchymal transition	sfrp2,spry1,isl1,smad2,notch1,wnt11,msx2,znf703,tgfb2,bmp2,hey2,bmp5,wwtr1,twist1,foxf2,ldlrad4,hey1,has2,fgfr2,eng,pofut2,snai1,olfm1,adam15,tcf7l2,wnt5a	4.47939
139	3.44106e-05	GO:0071495	cellular response to endogenous stimulus	fgfr3,slit2,hpgd,sfrp2,nr3c2,pgrmc2,spry1,h2afz,snca,rest,lpl,ugcg,klf4,myh6,apc,xbp1,fbn2,foxd1,mef2c,nr2f1,htr1a,isl1,hcn1,ghr,prkaa1,prlr,adamts12,smad2,skor2,runx1,htr1f,nr0b1,dstyk,rap1a,mapk13,notch1,col4a1,gtf2f2,htr2a,shmt2,col2a1,vdr,ufm1,fgf9,fdx1,pdgfd,p2ry2,gabra1,drd1,msx2,cnot2,cacna2d1,aqp9,pcsk6,znf703,egr3,cd44,cyr61,flrt1,adcy7,cdh5,tgfb2,bmp2,arid1b,bcl2l11,oprm1,foxo3,phip,map…	4.46331
140	3.7757e-05	GO:0061138	morphogenesis of a branching epithelium	slit2,sfrp2,ednra,spry1,egf,foxd1,gdnf,notch1,col4a1,vdr,msx2,sema3a,adm,sall1,foxf1,prox1,bmp2,nrp1,bcl2,gli3,eya1,rspo2,fgfr2,eng,ar,tgm2,rxra,gli2,vegfa,wnt5a	4.423
141	3.89381e-05	GO:0061326	renal tubule development	prom1,lif,foxd1,mef2c,gdnf,notch1,col4a1,wnt11,sall1,bmp2,wwtr1,osr1,bcl2,gli3,eya1,calb1,ttc8,fmn1,stat1,wnt7b,vegfa	4.40963
142	4.72145e-05	GO:0001932	regulation of protein phosphorylation	fgfr3,slit2,npy5r,sfrp2,spry1,egf,snca,dusp4,ptpn13,dgkq,musk,klf4,c9orf72,gadd45g,inpp5j,lif,apc,sema6a,cartpt,mef2c,isl1,ghr,prkaa1,prlr,robo1,taok1,rspo1,kiss1,dstyk,mapkapk2,rap1a,notch1,htr2a,ccna1,fgf9,pdgfd,wnt11,ccnd2,csf1r,sh3rf2,drd1,cntn1,reln,sema3a,dvl2,ipo7,cd44,pax6,aktip,il34,cyr61,lpar3,dus2,adcy7,qars,arl6ip5,tgfb2,prox1,nenf,bmp2,oprm1,phip,map3k7,gfral,bmp5,wwtr1,ptk2b,prkag1,…	4.32593
143	5.29783e-05	GO:0045596	negative regulation of cell differentiation	slit2,sfrp2,ppp3ca,ptprs,rest,inpp5j,xbp1,sema6a,cartpt,nr2f1,plk2,isl1,adamts12,skor2,runx1,rtn4rl1,srgap2,notch1,fgf9,cxcl14,msx2,sema3a,hmg20a,lingo1,pax6,sema3f,fezf2,tgfb2,ush2a,bmp2,hey2,foxo3,bmp5,nlgn1,bcl6,wwtr1,osr1,ptk2b,wnt9a,insig1,nrp1,zeb1,twist1,bcl2,gli3,ldlrad4,lyn,hey1,asap1,ski,tsc1,cdk5rap2,fgf13,eif2ak4,stx1b,socs1,stat1,hdac4,itgb3,nfatc2,snai1,mafb,myocd,pmp22,daam2,syt4,c…	4.2759
144	5.37793e-05	GO:0048706	embryonic skeletal system development	dmrt2,pcsk5,mef2c,smad2,col2a1,fgf9,wnt11,alx4,osr1,wnt9a,zeb1,twist1,gli3,eya1,ext1,fgfr2,satb2,acvr2a,hoxb1,hoxb2,hoxb4,tbx15,wdr19,wnt5a	4.26939
145	6.12663e-05	GO:0032879	regulation of localization	rab11fip5,atoh8,ldb2,slit2,cep135,slc25a4,npy5r,sfrp2,ednra,egf,ank2,tacr3,ppp3ca,unc5c,snca,rest,lpl,abhd17a,anxa3,dgkq,klf4,lif,slc8b1,apc,xbp1,sema6a,cartpt,mef2c,glrx,htr1a,plk2,isl1,hcn1,prkaa1,gdnf,lman1,cplx4,gja5,dscam,adamts1,robo1,ankrd13b,plxna2,fabp3,ptpru,rspo1,kiss1,srgap2,rap1a,slc16a1,tnnt2,itpr3,notch1,rims3,ap2b1,rph3al,gpc6,ndfip2,pcdh17,htr2a,fgf9,gria4,pdgfd,p2ry2,sytl2,wnt11…	4.21278
146	6.14875e-05	GO:0061448	connective tissue development	fgfr3,evc,sfrp2,xbp1,foxd1,mef2c,ghr,adamts12,mex3c,notch1,col2a1,fgf9,pdgfd,wnt11,pitx1,msx2,cd44,cyr61,bmp2,bmp5,osr1,wnt9a,pth1r,zeb1,gli3,bmp6,gdf6,rspo2,crip1,satb2,snai1,sox5,wnt7b,thra,gli2,sox6,col11a2,wnt5a	4.21121
147	6.24906e-05	GO:0023061	signal release	rab11fip5,slc25a4,ppp3ca,snca,rest,lif,slc8b1,stx2,foxd1,cartpt,mef2c,htr1a,isl1,cplx4,smad2,ildr2,kiss1,rap1a,slc16a1,itpr3,rims3,rph3al,htr2a,drd1,ppfia2,pclo,adm,ano1,cadps,oprm1,cga,rims1,nlgn1,nrn1,myrip,bmp6,lyn,sybu,mafa,c2cd2l,btk,stx1b,sstr5,c1qtnf1,dpp4,hrh3,slc32a1,syt4,dnm1l,cspg5,glp1r,erc2,stx3,tcf7l2	4.20419
148	7.39799e-05	GO:2000027	regulation of animal organ morphogenesis	sfrp2,spry1,enam,dmrt3,lif,xbp1,isl1,gdnf,robo1,notch1,tbx2,ap2b1,gpc6,vdr,wnt11,dvl2,ror1,prickle2,psmd6,tgfb2,bmp2,naca,fzd1,twist1,bcl2,eya1,rspo2,fgfr2,ajap1,eng,ar,stat1,psmd5,rxra,vegfa,wnt5a	4.13089
149	7.48915e-05	GO:0007411	axon guidance	gfra4,slit2,unc5c,sema6a,foxd1,isl1,gdnf,dscam,epha6,robo1,plxna2,csf1r,reln,sema3a,ephb4,pax6,siah1,sema3f,fezf2,enah,nrp1,gli3,ext1,gfra1,cxcl12,zswim8,robo3,l1cam,ttc8,evl,igsf9,cxcr4,dok5,boc,vax1,gli2,vegfa,wnt5a	4.12557
150	7.50407e-05	GO:0019220	regulation of phosphate metabolic process	fgfr3,ldb2,slit2,npy5r,sfrp2,spry1,egf,snca,dusp4,ptpn13,dgkq,musk,klf4,c9orf72,gadd45g,inpp5j,lif,apc,tmem132d,sema6a,cartpt,mef2c,isl1,ghr,prkaa1,prlr,zbtb20,dscam,robo1,taok1,fabp3,rspo1,kiss1,dstyk,mapkapk2,rap1a,notch1,htr2a,shmt2,ccna1,fgf9,pdgfd,rab38,sytl2,wnt11,ccnd2,csf1r,sh3rf2,ppp2r2b,drd1,nuak1,cntn1,reln,sema3a,dvl2,ipo7,cd44,pax6,aktip,il34,cyr61,lpar3,dus2,adcy7,qars,ppp4r2,arl6ip…	4.1247
151	8.04423e-05	GO:0051174	regulation of phosphorus metabolic process	fgfr3,ldb2,slit2,npy5r,sfrp2,spry1,egf,snca,dusp4,ptpn13,dgkq,musk,klf4,c9orf72,gadd45g,inpp5j,lif,apc,tmem132d,sema6a,cartpt,mef2c,isl1,ghr,prkaa1,prlr,zbtb20,dscam,robo1,taok1,fabp3,rspo1,kiss1,dstyk,mapkapk2,rap1a,notch1,htr2a,shmt2,ccna1,fgf9,pdgfd,rab38,sytl2,wnt11,ccnd2,csf1r,sh3rf2,ppp2r2b,drd1,nuak1,cntn1,reln,sema3a,dvl2,ipo7,cd44,pax6,aktip,il34,cyr61,lpar3,dus2,adcy7,qars,ppp4r2,arl6ip…	4.09452
152	8.25815e-05	GO:0097485	neuron projection guidance	gfra4,slit2,unc5c,sema6a,foxd1,isl1,gdnf,dscam,epha6,robo1,plxna2,csf1r,reln,sema3a,ephb4,pax6,siah1,sema3f,fezf2,enah,nrp1,gli3,ext1,gfra1,cxcl12,zswim8,robo3,l1cam,ttc8,evl,igsf9,cxcr4,dok5,boc,vax1,gli2,vegfa,wnt5a	4.08312
153	9.87886e-05	GO:0045935	positive regulation of nucleobase-containing compound metabolic process	nkx1-1,atoh8,msantd1,ldb2,sfrp2,egf,tet2,ppp3ca,h2afz,rest,anxa3,klf4,dmrt2,lif,camk4,patz1,xbp1,foxd1,mef2c,nr2f1,isl1,prkaa1,gdnf,rax,tcf4,smad2,zbtb20,ets2,erg,runx1,aatf,pou3f1,sox13,dcaf6,notch1,nfyc,auts2,nufip1,gtf2f2,htr2a,vdr,hoxc13,cdx2,wnt11,pitx1,egr3,dvl2,alx4,trim44,pax6,cyr61,sall1,cdh13,foxf1,s1pr1,fezf2,tgfb2,prox1,bmp2,tbpl1,arid1b,hey2,vgll2,foxo3,phip,cga,bmp5,wwtr1,tfdp2,myt1…	4.00529
154	0.000103317	GO:0048562	embryonic organ morphogenesis	vax2,fbn2,mef2c,smad2,notch1,tbx2,col2a1,fgf9,wnt11,dvl2,alx4,pax6,sall1,foxf1,prox1,osr1,wnt9a,insig1,zeb1,twist1,foxf2,gli3,eya1,fgfr2,eng,slc44a4,satb2,hoxb1,hoxb2,hoxb4,mafb,ndrg4,gata4,tbx15,gli2,wdr19,ccdc40,sox18,wnt5a	3.98583
155	0.00011215	GO:0006468	protein phosphorylation	fastkd5,gfra4,fgfr3,ctbp1,stk32b,slit2,npy5r,sfrp2,spry1,egf,alpk1,snca,dusp4,ptpn13,dgkq,musk,klf4,c9orf72,gadd45g,inpp5j,lif,apc,camk4,sema6a,cartpt,mef2c,plk2,isl1,ghr,prkaa1,gdnf,prlr,smad2,erg,epha6,robo1,taok1,rspo1,kiss1,dstyk,mapkapk2,rap1a,mapk13,notch1,htr2a,ccna1,fgf9,pdgfd,wnt11,ccnd2,csf1r,sh3rf2,drd1,nuak1,cntn1,reln,sema3a,trpm7,dvl2,ephb4,ipo7,cd44,pax6,aktip,il34,cyr61,lpar3,dus2…	3.9502
156	0.000112438	GO:0042325	regulation of phosphorylation	fgfr3,ldb2,slit2,npy5r,sfrp2,spry1,egf,snca,dusp4,ptpn13,dgkq,musk,klf4,c9orf72,gadd45g,inpp5j,lif,apc,sema6a,cartpt,mef2c,isl1,ghr,prkaa1,prlr,zbtb20,dscam,robo1,taok1,rspo1,kiss1,dstyk,mapkapk2,rap1a,notch1,htr2a,shmt2,ccna1,fgf9,pdgfd,wnt11,ccnd2,csf1r,sh3rf2,drd1,cntn1,reln,sema3a,dvl2,ipo7,cd44,pax6,aktip,il34,cyr61,lpar3,dus2,adcy7,qars,arl6ip5,tgfb2,prox1,nenf,bmp2,oprm1,nup43,phip,map3k7,…	3.94909
157	0.000114404	GO:0003170	heart valve development	slit2,mef2c,gja5,robo1,notch1,cyr61,adamts9,tgfb2,bmp2,hey2,twist1,hey1,snai1,gata4,olfm1,emilin1	3.94156
158	0.000122206	GO:0072073	kidney epithelium development	prom1,slit2,spry1,lif,foxd1,mef2c,gdnf,smad2,notch1,wnt11,podxl,sall1,bmp2,sim1,wwtr1,osr1,bcl2,gli3,eya1,calb1,fgfr2,fmn1,stat1,wnt7b,vegfa	3.91291
159	0.000135928	GO:0090596	sensory organ morphogenesis	vax2,prom1,fat1,rpgrip1,fbn2,hcn1,dscam,tbx2,col2a1,hoxc13,fgf9,tsku,dvl2,fjx1,pax6,sall1,prox1,osr1,wnt9a,insig1,zeb1,twist1,foxf2,bcl2,gli3,eya1,calb1,fgfr2,ski,slc44a4,ttc8,mafb,gli2,vegfa,wdr19,wnt5a	3.86669
160	0.000168495	GO:0007165	signal transduction	gfra4,vax2,dctn1,fgfr3,atoh8,rab28,clnk,stk32b,evc,afap1,sorcs2,slit2,arap2,sorbs2,cdkn2aip,hpgd,fbxo8,npy5r,sfrp2,nr3c2,ednra,pgrmc2,spry1,egf,alpk1,ank2,tacr3,ppp3ca,tspan5,unc5c,snca,ptprs,lpl,dusp4,cfd,ptpn13,anxa3,ugcg,dgkq,musk,klf4,mtap,c9orf72,ptprd,cdc14b,gadd45g,myh6,lif,apc,camk4,fbxl17,rab36,stx2,xbp1,fbn2,sema6a,foxd1,cartpt,mef2c,nr2f1,lnpep,cd180,htr1a,plk2,isl1,ghr,prkaa1,gdnf,prl…	3.77341
161	0.000193561	GO:0031399	regulation of protein modification process	fgfr3,ctbp1,slit2,npy5r,sfrp2,spry1,egf,mad2l1,snca,dusp4,ptpn13,dgkq,musk,klf4,c9orf72,cdc14b,gadd45g,inpp5j,lif,apc,sema6a,cartpt,mef2c,isl1,ghr,prkaa1,prlr,robo1,taok1,rspo1,kiss1,dstyk,mapkapk2,rap1a,notch1,auts2,ndfip2,htr2a,ccna1,fgf9,pdgfd,wnt11,ccnd2,csf1r,sh3rf2,ppp2r2b,drd1,nuak1,cntn1,reln,sema3a,hmg20a,dvl2,ipo7,trim44,cd44,pax6,aktip,il34,cyr61,lpar3,dus2,adcy7,trabd2b,qars,ppp4r2,ar…	3.71318
162	0.000198436	GO:0050789	regulation of biological process	gfra4,tex261,vax2,dctn1,rab11fip5,fgfr3,nkx1-1,maea,ctbp1,atoh8,msantd1,ldb2,prom1,rab28,clnk,stk32b,evc,afap1,sorcs2,sepsecs,slit2,arap2,cep135,sorbs2,slc25a4,cdkn2aip,hpgd,fbxo8,npy5r,rbm46,sfrp2,nr3c2,prmt9,ednra,pgrmc2,spry1,kiaa1109,egf,alpk1,ank2,mad2l1,prdm5,tet2,tacr3,ppp3ca,h2afz,tspan5,unc5c,snca,enam,ptprs,rest,lpl,dusp4,abhd17a,cfd,ptpn13,anxa3,sept11,ugcg,dgkq,musk,slc24a2,klf4,mtap,…	3.70238
163	0.000202649	GO:0001934	positive regulation of protein phosphorylation	fgfr3,npy5r,sfrp2,egf,snca,dgkq,musk,gadd45g,lif,cartpt,mef2c,isl1,ghr,prkaa1,prlr,robo1,taok1,rspo1,kiss1,dstyk,mapkapk2,rap1a,notch1,htr2a,fgf9,pdgfd,wnt11,ccnd2,csf1r,sh3rf2,cntn1,reln,sema3a,dvl2,cd44,aktip,il34,cyr61,lpar3,adcy7,arl6ip5,tgfb2,prox1,nenf,bmp2,oprm1,map3k7,gfral,bmp5,ptk2b,prkag1,nrp1,map3k8,fzd1,bcl2,znf622,bmp6,cdh2,lyn,gdf6,angpt1,rplp1,cd4,fas,fgfr2,eng,ar,fgf13,ccnk,prkd1…	3.69326
164	0.000209315	GO:0001763	morphogenesis of a branching structure	slit2,sfrp2,ednra,spry1,egf,foxd1,gdnf,notch1,col4a1,vdr,msx2,sema3a,adm,sall1,foxf1,prox1,bmp2,nrp1,bcl2,gli3,eya1,rspo2,fgfr2,eng,ar,tgm2,rxra,gli2,vegfa,wnt5a	3.6792
165	0.000213259	GO:0003230	cardiac atrium development	ank2,myh6,isl1,gja5,notch1,cyr61,tgfb2,prox1,hey2,eng,gata4,wnt5a	3.67109
166	0.000214014	GO:0045937	positive regulation of phosphate metabolic process	fgfr3,npy5r,sfrp2,egf,snca,dgkq,musk,gadd45g,lif,cartpt,mef2c,isl1,ghr,prkaa1,prlr,zbtb20,dscam,robo1,taok1,fabp3,rspo1,kiss1,dstyk,mapkapk2,rap1a,notch1,htr2a,fgf9,pdgfd,rab38,wnt11,ccnd2,csf1r,sh3rf2,cntn1,reln,sema3a,dvl2,cd44,aktip,il34,cyr61,lpar3,adcy7,arl6ip5,tgfb2,prox1,nenf,bmp2,oprm1,map3k7,gfral,bmp5,ptk2b,pth1r,prkag1,nrp1,map3k8,fzd1,bcl2,znf622,bmp6,cdh2,lyn,gdf6,angpt1,rplp1,cd4,fa…	3.66956
167	0.000214014	GO:0010562	positive regulation of phosphorus metabolic process	fgfr3,npy5r,sfrp2,egf,snca,dgkq,musk,gadd45g,lif,cartpt,mef2c,isl1,ghr,prkaa1,prlr,zbtb20,dscam,robo1,taok1,fabp3,rspo1,kiss1,dstyk,mapkapk2,rap1a,notch1,htr2a,fgf9,pdgfd,rab38,wnt11,ccnd2,csf1r,sh3rf2,cntn1,reln,sema3a,dvl2,cd44,aktip,il34,cyr61,lpar3,adcy7,arl6ip5,tgfb2,prox1,nenf,bmp2,oprm1,map3k7,gfral,bmp5,ptk2b,pth1r,prkag1,nrp1,map3k8,fzd1,bcl2,znf622,bmp6,cdh2,lyn,gdf6,angpt1,rplp1,cd4,fa…	3.66956
168	0.000227369	GO:1905114	cell surface receptor signaling pathway involved in cell-cell signaling	vax2,sfrp2,egf,ppp3ca,snca,klf4,myh6,apc,mef2c,isl1,prkaa1,mbd2,igsf11,runx1,ptpru,rspo1,notch1,ap2b1,gpc6,amer2,fgf9,tsku,wnt11,reln,znf703,dvl2,sall1,ror1,trabd2b,prickle2,psmd6,bmp2,oprm1,foxo3,map3k7,rims1,nlgn1,wwtr1,ptk2b,wnt9a,fzd1,gli3,rbms3,cdh2,rspo2,fgfr2,tmem88,ski,shank1,stx1b,grin2a,nr4a2,zeb2,igfbp2,csnk1d,daam2,psmd5,ctr9,wnt7b,igfbp4,barx1,gli2,tcf7l2,wnt5a	3.64327
169	0.000243336	GO:0001503	ossification	gfra4,fgfr3,sfrp2,rest,mn1,fbn2,hsd17b4,mef2c,notch1,col2a1,fgf9,wnt11,msx2,itga11,cyr61,cdh11,s1pr1,tgfb2,bmp2,bmp5,wwtr1,osr1,ptk2b,pth1r,fzd1,twist1,bcl2,gli3,bmp6,rspo2,ext1,fgfr2,kazald1,ski,prkd1,satb2,hdac4,acvr2a,phb,snai1,wnt7b,thra,gli2,adar,col11a2,nell1,wnt5a	3.61379
170	0.000248278	GO:0055123	digestive system development	sfrp2,pcsk5,xbp1,smad2,notch1,tbx2,cdx2,fgf9,wnt11,alx4,sall1,foxf1,tgfb2,foxf2,bcl2,gli3,fgfr2,clmp,myocd,gata4,barx1,gli2,wdr19,ccdc40,wnt5a	3.60506
171	0.000254936	GO:0048608	reproductive structure development	slit2,sfrp2,dmrta1,lif,patz1,hsd17b4,adamts1,nr0b1,notch1,vdr,cdx2,fgf9,sema3a,adm,cyr61,sall1,tgfb2,hey2,bcl2l11,foxo3,cga,bmp5,osr1,foxf2,bcl2,gli3,bmp6,hey1,zfat,fgfr2,ar,crip1,lfng,idh1,acvr2a,krt19,snai1,myocd,tfap2c,gata4,gas2,rxra,eaf2,nr5a1,wnt7b,gli2,vegfa,wdr19,adam15,wnt5a	3.59357
172	0.000279206	GO:0061061	muscle structure development	evc,sgcz,frg1,sorbs2,ank2,ppp3ca,rest,myh6,lif,myo18b,xbp1,mef2c,isl1,prkaa1,sypl2,tnnt2,notch1,tbx2,fgf9,cxcl14,pitx1,csrp2,itga11,egr3,olfm2,adm,alx4,foxf1,s1pr1,disp1,tgfb2,prox1,bmp2,hey2,vgll2,bves,naca,zeb1,svil,fzd1,twist1,hdac9,bcl2,cdh2,msc,hey1,fgfr2,ski,eng,tsc1,actc1,casq1,rbfox1,hdac4,krt19,nfatc2,myocd,gata4,rxra,csrp3,boc,vax1,ankrd17,vegfa,sox6,nrap,tcf7l2,wnt5a	3.55408
173	0.000291938	GO:0042327	positive regulation of phosphorylation	fgfr3,npy5r,sfrp2,egf,snca,dgkq,musk,gadd45g,lif,cartpt,mef2c,isl1,ghr,prkaa1,prlr,zbtb20,dscam,robo1,taok1,rspo1,kiss1,dstyk,mapkapk2,rap1a,notch1,htr2a,fgf9,pdgfd,wnt11,ccnd2,csf1r,sh3rf2,cntn1,reln,sema3a,dvl2,cd44,aktip,il34,cyr61,lpar3,adcy7,arl6ip5,tgfb2,prox1,nenf,bmp2,oprm1,map3k7,gfral,bmp5,ptk2b,prkag1,nrp1,map3k8,fzd1,bcl2,znf622,bmp6,cdh2,lyn,gdf6,angpt1,rplp1,cd4,fas,fgfr2,eng,ar,fgf…	3.53471
174	0.000315515	GO:0061458	reproductive system development	slit2,sfrp2,dmrta1,lif,patz1,hsd17b4,adamts1,nr0b1,notch1,vdr,cdx2,fgf9,sema3a,adm,cyr61,sall1,tgfb2,hey2,bcl2l11,foxo3,cga,bmp5,osr1,foxf2,bcl2,gli3,bmp6,hey1,zfat,fgfr2,ar,crip1,lfng,idh1,acvr2a,krt19,snai1,myocd,tfap2c,gata4,gas2,rxra,eaf2,nr5a1,wnt7b,gli2,vegfa,wdr19,adam15,wnt5a	3.50098
175	0.000335325	GO:0003209	cardiac atrium morphogenesis	myh6,isl1,gja5,notch1,cyr61,tgfb2,prox1,hey2,eng,gata4,wnt5a	3.47453
176	0.000345005	GO:0060840	artery development	hpgd,gja5,robo1,notch1,tbx2,ap2b1,wnt11,foxf1,adamts9,tgfb2,prox1,hey2,apob,nrp1,gli3,eya1,hey1,eng,myocd,vegfa	3.46217
177	0.000358458	GO:0043583	ear development	mapkapk2,notch1,col2a1,fgf9,cxcl14,dvl2,rpgrip1l,sall1,ror1,tgfb2,ush2a,prox1,bmp2,hey2,bcl2l11,bmp5,osr1,insig1,zeb1,twist1,bcl2,gli3,eya1,calb1,fgfr2,slc44a4,ttc8,pvalb,mafb,gli2,wdr19,wnt5a	3.44556
178	0.000358458	GO:0001649	osteoblast differentiation	sfrp2,rest,fbn2,hsd17b4,mef2c,notch1,fgf9,wnt11,msx2,itga11,cyr61,bmp2,wwtr1,pth1r,fzd1,twist1,gli3,bmp6,rspo2,fgfr2,ski,prkd1,satb2,hdac4,acvr2a,phb,snai1,wnt7b,gli2,adar,col11a2,nell1	3.44556
179	0.000362629	GO:0003281	ventricular septum development	slit2,gja5,robo1,notch1,ap2b1,wnt11,cyr61,sall1,tgfb2,prox1,hey2,fzd1,hey1,fgfr2,sall4,gata4,wnt5a	3.44054
180	0.000363446	GO:0010976	positive regulation of neuron projection development	slit2,ptprd,enc1,dscam,robo1,plxna2,rap1a,slitrk1,cntn1,reln,dvl2,lpar3,negr1,nckipsd,cpne5,bmp5,rims1,nlgn1,ptk2b,nrp1,fzd1,lyn,zfyve27,cxcl12,shank1,l1cam,prkd1,crabp2,zeb2,cxcr4,ndrg4,syt4,eif4g2,dnm1l,vegfa,epo,wnt5a	3.43956
181	0.000366099	GO:0055001	muscle cell development	sgcz,sorbs2,ank2,ppp3ca,myh6,myo18b,mef2c,sypl2,tnnt2,notch1,csrp2,adm,prox1,hey2,bves,naca,hdac9,bcl2,ski,eng,actc1,casq1,hdac4,krt19,nfatc2,gata4,csrp3,vegfa,nrap	3.4364
182	0.000383673	GO:0048738	cardiac muscle tissue development	sgcz,sorbs2,myh6,myo18b,mef2c,isl1,gja5,tnnt2,notch1,tbx2,fgf9,tenm4,s1pr1,adamts9,tgfb2,prox1,bmp2,hey2,bves,bmp5,fgfr2,eng,tsc1,actc1,ndrg4,myocd,gata4,rxra,csrp3,vegfa,sox6,nrap,wnt5a	3.41604
183	0.00041673	GO:0000122	negative regulation of transcription by RNA polymerase II	vax2,ctbp1,ldb2,prdm5,snca,rest,klf4,znf608,mef2c,nr2f1,isl1,tcf4,mbd2,smad2,skor2,zbtb20,ets2,runx1,nr0b1,notch1,tbx2,vdr,cdx2,fgf9,msx2,cnot2,chchd3,hmg20a,pax6,sall1,foxf1,fezf2,prox1,bmp2,hey2,foxo3,bcl6,mcph1,wwtr1,myt1l,osr1,naca,zeb1,twist1,hdac9,gli3,bmp6,msc,hey1,fgfr2,ski,ar,stat1,satb2,hdac4,nr4a2,zeb2,rpl23,hoxb4,phb,sall4,nfatc2,snai1,myocd,tfap2c,rxra,ctr9,vax1,nacc2,foxk2,thra,tbx1…	3.38014
184	0.000435434	GO:0001944	vasculature development	slit2,hpgd,sfrp2,ednra,egf,anxa3,klf4,pcsk5,lif,myo18b,xbp1,sema6a,mef2c,plk2,isl1,tcf4,gja5,runx1,robo1,rap1a,notch1,tbx2,ap2b1,col4a1,cdx2,fgf9,pdgfd,wnt11,egr3,ephb4,adm,pax6,cyr61,cdh5,cdh13,foxf1,s1pr1,adamts9,tgfb2,ptpn14,prox1,hey2,osr1,apob,ptk2b,nrp1,twist1,hdac9,ahr,gli3,cdh2,eya1,hey1,angpt1,has2,fgfr2,eng,prkd1,thbs1,itgax,stat1,cxcr4,itgb3,nfatc2,myocd,gata4,egfl7,pofut1,wnt7b,ankrd1…	3.36108
185	0.00047138	GO:0006836	neurotransmitter transport	snca,stx2,mef2c,htr1a,slc1a3,gdnf,cplx4,rap1a,rims3,htr2a,slc6a7,drd1,ppfia2,pclo,slc1a2,slc6a8,arl6ip5,cadps,rims1,nlgn1,nrn1,lyn,btk,slc44a4,stx1b,hrh3,itgb3,slc32a1,slc6a1,syt4,slc17a6,dnm1l,cspg5,slc25a18,erc2,stx3	3.32663
186	0.000487036	GO:0048754	branching morphogenesis of an epithelial tube	slit2,sfrp2,ednra,spry1,egf,foxd1,gdnf,notch1,col4a1,vdr,msx2,sall1,foxf1,bmp2,nrp1,bcl2,gli3,eya1,rspo2,fgfr2,eng,ar,gli2,vegfa,wnt5a	3.31244
187	0.000492971	GO:0007423	sensory organ development	vax2,prom1,fat1,klf4,rpgrip1,fbn2,hcn1,rax,dscam,mapkapk2,notch1,tbx2,col4a1,col2a1,hoxc13,fgf9,tsku,cxcl14,dvl2,fjx1,pax6,rpgrip1l,sall1,ror1,tgfb2,ush2a,prox1,bmp2,hey2,bcl2l11,bmp5,osr1,wnt9a,insig1,nrp1,zeb1,twist1,foxf2,bcl2,gli3,bmp6,eya1,calb1,fgfr2,ski,bloc1s3,slc44a4,ttc8,pvalb,zeb2,mafb,rxra,vax1,wnt7b,gli2,vegfa,wdr19,wnt5a	3.30718
188	0.000498343	GO:0010648	negative regulation of cell communication	rab11fip5,sorcs2,slit2,npy5r,sfrp2,spry1,egf,ppp3ca,snca,ptprs,rest,dusp4,slc24a2,klf4,lif,apc,xbp1,fbn2,sema6a,cartpt,plk2,isl1,prkaa1,gdnf,adamts12,smad2,skor2,robo1,nr0b1,ptpru,rap1a,notch1,rph3al,pcdh17,htr2a,col2a1,amer2,fgf9,tsku,wnt11,sh3rf2,drd1,cnot2,dvl2,adm,cd44,sigirr,siah1,rpgrip1l,trabd2b,qars,psmd6,tgfb2,bmp2,snx5,hey2,oprm1,foxo3,phip,gfral,bmp5,bcl6,wwtr1,ptk2b,insig1,zmynd11,nrp…	3.30247
189	0.000548353	GO:0048844	artery morphogenesis	hpgd,gja5,notch1,tbx2,wnt11,foxf1,adamts9,tgfb2,prox1,hey2,apob,nrp1,eya1,hey1,eng,myocd,vegfa	3.26094
190	0.000576952	GO:0023057	negative regulation of signaling	rab11fip5,sorcs2,slit2,npy5r,sfrp2,spry1,egf,ppp3ca,snca,ptprs,rest,dusp4,slc24a2,klf4,lif,apc,xbp1,fbn2,sema6a,cartpt,plk2,isl1,prkaa1,gdnf,adamts12,smad2,skor2,robo1,nr0b1,ptpru,rap1a,notch1,rph3al,pcdh17,htr2a,col2a1,amer2,fgf9,tsku,wnt11,sh3rf2,drd1,cnot2,dvl2,adm,cd44,sigirr,siah1,rpgrip1l,trabd2b,qars,psmd6,tgfb2,bmp2,snx5,hey2,oprm1,foxo3,phip,gfral,bmp5,bcl6,wwtr1,ptk2b,insig1,zmynd11,nrp…	3.23886
191	0.000593138	GO:0072080	nephron tubule development	prom1,lif,foxd1,mef2c,gdnf,notch1,wnt11,sall1,bmp2,wwtr1,osr1,bcl2,gli3,eya1,calb1,fmn1,stat1,wnt7b,vegfa	3.22684
192	0.000689449	GO:0001568	blood vessel development	slit2,hpgd,sfrp2,ednra,egf,anxa3,klf4,pcsk5,myo18b,xbp1,sema6a,mef2c,plk2,isl1,tcf4,gja5,runx1,robo1,rap1a,notch1,tbx2,ap2b1,col4a1,cdx2,fgf9,pdgfd,wnt11,egr3,ephb4,adm,pax6,cyr61,cdh5,cdh13,foxf1,s1pr1,adamts9,tgfb2,prox1,hey2,osr1,apob,ptk2b,nrp1,twist1,hdac9,ahr,gli3,cdh2,eya1,hey1,angpt1,has2,fgfr2,eng,prkd1,thbs1,itgax,stat1,cxcr4,itgb3,myocd,gata4,egfl7,pofut1,wnt7b,ankrd17,vegfa,adam15,tcf…	3.1615
193	0.000712945	GO:0072358	cardiovascular system development	slit2,hpgd,sfrp2,ednra,egf,anxa3,klf4,pcsk5,lif,myo18b,xbp1,sema6a,mef2c,plk2,isl1,tcf4,gja5,runx1,robo1,rap1a,notch1,tbx2,ap2b1,col4a1,cdx2,fgf9,pdgfd,wnt11,egr3,ephb4,adm,pax6,cyr61,cdh5,cdh13,foxf1,s1pr1,adamts9,tgfb2,ptpn14,prox1,hey2,osr1,apob,ptk2b,nrp1,twist1,hdac9,ahr,gli3,cdh2,eya1,hey1,angpt1,has2,fgfr2,eng,prkd1,thbs1,itgax,stat1,cxcr4,itgb3,nfatc2,myocd,gata4,egfl7,pofut1,wnt7b,ankrd1…	3.14694
194	0.000745394	GO:0003171	atrioventricular valve development	gja5,notch1,cyr61,tgfb2,bmp2,hey2,twist1,hey1,gata4,olfm1	3.12761
195	0.000869314	GO:0009967	positive regulation of signal transduction	fgfr3,clnk,evc,cdkn2aip,npy5r,sfrp2,nr3c2,egf,alpk1,tspan5,gadd45g,lif,xbp1,foxd1,cartpt,mef2c,cd180,plk2,isl1,ghr,prkaa1,prlr,mbd2,smad2,skor2,igsf11,sh3bgr,robo1,taok1,rspo1,kiss1,dstyk,mapkapk2,rap1a,notch1,auts2,ndfip2,htr2a,fgf9,gucy1a2,pdgfd,wnt11,csf1r,sh3rf2,msx2,reln,sema3a,dvl2,trim44,cd44,siah1,cyr61,lpar3,sall1,cdh13,ror1,arl6ip5,psmd6,disp1,tgfb2,nenf,bmp2,bcl2l11,oprm1,phip,map3k7,g…	3.06082
196	0.00111721	GO:0043410	positive regulation of MAPK cascade	fgfr3,npy5r,egf,gadd45g,lif,cartpt,mef2c,ghr,prkaa1,robo1,taok1,kiss1,dstyk,mapkapk2,rap1a,notch1,htr2a,fgf9,pdgfd,csf1r,sh3rf2,sema3a,dvl2,cd44,lpar3,arl6ip5,tgfb2,nenf,bmp2,oprm1,map3k7,gfral,ptk2b,nrp1,map3k8,znf622,cdh2,gdf6,angpt1,cd4,fgfr2,ar,thbs1,c1qtnf1,zeb2,cxcr4,phb,dok5,ube2v1,ndrg4,gata4,pik3r5,wnt7b,igfbp4,vegfa,epo,wnt5a	2.95187
197	0.00115439	GO:0065007	biological regulation	gfra4,tex261,vax2,dctn1,rab11fip5,fgfr3,nkx1-1,maea,ctbp1,atoh8,msantd1,ldb2,prom1,rab28,clnk,stk32b,evc,afap1,sorcs2,grpel1,sepsecs,slit2,arap2,cep135,sgcz,sorbs2,slc25a4,cdkn2aip,hpgd,fbxo8,npy5r,rbm46,sfrp2,nr3c2,prmt9,ednra,pgrmc2,spry1,kiaa1109,egf,alpk1,ank2,mad2l1,prdm5,tet2,tacr3,ppp3ca,h2afz,tspan5,unc5c,snca,enam,ptprs,rest,lpl,dusp4,abhd17a,cfd,ptpn13,anxa3,sept11,ugcg,dgkq,musk,slc24a…	2.93765
198	0.00117442	GO:0035282	segmentation	sfrp2,dmrt2,plxna2,notch1,pcdh8,cdx2,sema3a,pcsk6,dvl2,foxf1,sema3f,osr1,xrcc2,nrp1,lfng,zeb2,mafb,pofut1,wnt5a	2.93018
199	0.00118511	GO:0042692	muscle cell differentiation	sgcz,sorbs2,ank2,ppp3ca,myh6,myo18b,xbp1,mef2c,sypl2,tnnt2,notch1,tbx2,fgf9,csrp2,olfm2,adm,foxf1,prox1,bmp2,hey2,bves,naca,zeb1,hdac9,bcl2,cdh2,hey1,fgfr2,ski,eng,tsc1,actc1,casq1,hdac4,krt19,nfatc2,myocd,gata4,rxra,csrp3,boc,ankrd17,vegfa,sox6,nrap	2.92624
200	0.00123216	GO:0035051	cardiocyte differentiation	sorbs2,spry1,rest,myh6,myo18b,mef2c,isl1,notch1,tbx2,tenm4,tgfb2,prox1,bmp2,hey2,bves,twist1,tsc1,actc1,myocd,gata4,rxra,csrp3,vegfa,sox6,nrap,sox18	2.90933
201	0.00126642	GO:0070848	response to growth factor	fgfr3,slit2,hpgd,sfrp2,spry1,snca,anxa3,klf4,myh6,fbn2,sema6a,foxd1,mef2c,adamts12,tcf4,smad2,skor2,robo1,dstyk,mapkapk2,rap1a,notch1,gtf2f2,col2a1,fgf9,pdgfd,msx2,pcsk6,znf703,egr3,cd44,cyr61,flrt1,cdh5,tgfb2,bmp2,oprm1,foxo3,map3k7,bmp5,fgf12,nrp1,zeb1,fzd1,twist1,bmp6,ldlrad4,gdf6,has2,fgfr2,zfyve27,ski,eng,prkd1,thbs1,acvr2a,pmepa1,itgb3,csnk1d,dok5,myocd,gata4,sox5,adamtsl2,kcnc1,adamts3,veg…	2.89742
202	0.00134135	GO:0070887	cellular response to chemical stimulus	dctn1,rab11fip5,fgfr3,sod3,slit2,hpgd,sfrp2,nr3c2,pgrmc2,spry1,prdm5,ppp3ca,h2afz,unc5c,snca,rest,lpl,ptpn13,ugcg,klf4,mtap,myh6,lif,slc8b1,apc,xbp1,fbn2,sema6a,foxd1,mef2c,nr2f1,cd180,htr1a,isl1,hcn1,ghr,prkaa1,gdnf,prlr,adamts12,tcf4,mbd2,smad2,skor2,zbtb20,b3gat1,runx1,htr1f,robo1,nr0b1,laptm5,dstyk,mapkapk2,rap1a,slc16a1,mapk13,notch1,col4a1,gtf2f2,htr2a,shmt2,col2a1,vdr,ufm1,fgf9,fdx1,pdgfd,…	2.87246
203	0.00136603	GO:0003208	cardiac ventricle morphogenesis	npy5r,sfrp2,myh6,mef2c,isl1,tnnt2,notch1,foxf1,tgfb2,prox1,hey2,hey1,fgfr2,eng,gata4,rxra	2.86454
204	0.0014538	GO:0021772	olfactory bulb development	slit2,robo1,csf1r,sema3a,rpgrip1l,sall1,ext1,crtac1,ski,ttc8,wnt5a	2.8375
205	0.00150853	GO:0021879	forebrain neuron differentiation	slit2,otp,robo1,csf1r,drd1,sema3a,pax6,sall1,fezf2,prox1,nrp1,fgfr2,satb2,wnt5a	2.82145
206	0.00153731	GO:0045665	negative regulation of neuron differentiation	slit2,ppp3ca,ptprs,rest,inpp5j,sema6a,nr2f1,plk2,isl1,rtn4rl1,notch1,sema3a,hmg20a,lingo1,pax6,sema3f,fezf2,foxo3,nlgn1,nrp1,gli3,hey1,asap1,tsc1,cdk5rap2,fgf13,eif2ak4,stx1b,pmp22,dennd5a,wnt5a	2.81324
207	0.00154577	GO:0003158	endothelium development	atoh8,ptprs,marveld2,adamts12,gja5,rap1a,notch1,tjp1,cdh5,s1pr1,prox1,hey2,nrp1,zeb1,bmp6,hey1,eng,itgax,cxcr4,scube1,wnt7b,sox18	2.81086
208	0.0016698	GO:0051093	negative regulation of developmental process	fgfr3,slit2,sfrp2,ppp3ca,ptprs,rest,klf4,inpp5j,xbp1,sema6a,cartpt,nr2f1,plk2,isl1,adamts12,tcf4,skor2,runx1,robo1,rtn4rl1,srgap2,notch1,tbx2,fgf9,wnt11,cxcl14,msx2,sema3a,hmg20a,lingo1,pax6,sema3f,adamts9,fezf2,tgfb2,ush2a,bmp2,hey2,foxo3,cga,bmp5,nlgn1,bcl6,wwtr1,osr1,ptk2b,wnt9a,insig1,nrp1,zeb1,twist1,bcl2,gli3,ldlrad4,lyn,hey1,rspo2,asap1,ski,tsc1,cdk5rap2,fgf13,eif2ak4,thbs1,stx1b,lfng,socs…	2.77734
209	0.00171641	GO:0031401	positive regulation of protein modification process	fgfr3,ctbp1,npy5r,sfrp2,egf,snca,dgkq,musk,cdc14b,gadd45g,lif,cartpt,mef2c,isl1,ghr,prkaa1,prlr,robo1,taok1,rspo1,kiss1,dstyk,mapkapk2,rap1a,notch1,auts2,ndfip2,htr2a,fgf9,pdgfd,wnt11,ccnd2,csf1r,sh3rf2,cntn1,reln,sema3a,dvl2,cd44,aktip,il34,cyr61,lpar3,adcy7,trabd2b,arl6ip5,tgfb2,prox1,nenf,bmp2,oprm1,map3k7,gfral,bmp5,bcl6,ptk2b,prkag1,nrp1,map3k8,fzd1,bcl2,znf622,bmp6,cdh2,lyn,gdf6,angpt1,rplp…	2.76538
210	0.00173949	GO:0072009	nephron epithelium development	prom1,lif,foxd1,mef2c,gdnf,notch1,wnt11,podxl,sall1,bmp2,wwtr1,osr1,bcl2,gli3,eya1,calb1,fmn1,stat1,wnt7b,vegfa	2.75958
211	0.00175216	GO:0050770	regulation of axonogenesis	slit2,ptprs,wdr36,sema6a,dscam,robo1,plxna2,slitrk1,sema3a,lingo1,lrrc4c,lpar3,sema3f,fezf2,nrp1,cdh2,zfyve27,cxcl12,zswim8,l1cam,fgf13,crabp2,zeb2,olfm1,eif4g2,vegfa,wnt5a	2.75643
212	0.00197437	GO:0043408	regulation of MAPK cascade	fgfr3,npy5r,sfrp2,spry1,egf,dusp4,klf4,gadd45g,lif,sema6a,cartpt,mef2c,ghr,prkaa1,robo1,taok1,kiss1,dstyk,mapkapk2,rap1a,notch1,htr2a,fgf9,pdgfd,csf1r,sh3rf2,sema3a,dvl2,cd44,cyr61,lpar3,qars,arl6ip5,tgfb2,nenf,bmp2,oprm1,map3k7,gfral,bmp5,ptk2b,zmynd11,nrp1,map3k8,znf622,bmp6,cdh2,lyn,gdf6,angpt1,cd4,fas,fgfr2,ar,thbs1,c1qtnf1,zeb2,cxcr4,phb,dok5,ube2v1,ndrg4,gata4,pkhd1,pik3r5,wnt7b,igfbp4,npff…	2.70457
213	0.00202238	GO:0021988	olfactory lobe development	slit2,robo1,csf1r,sema3a,rpgrip1l,sall1,ext1,crtac1,ski,ttc8,wnt5a	2.69414
214	0.00220938	GO:0008284	positive regulation of cell population proliferation	fgfr3,hpgd,npy5r,sfrp2,egf,lif,xbp1,otp,mef2c,htr1a,isl1,prkaa1,gdnf,adamts1,notch1,tbx2,htr2a,shmt2,cdx2,fgf9,pdgfd,acer3,ccnd2,csf1r,znf703,egr3,adm,pax6,il34,cyr61,cdh13,foxf1,cdc7,s1pr1,tgfb2,prox1,bmp2,hey2,phip,cga,bmp5,bcl6,wwtr1,osr1,ptk2b,pth1r,naca,nrp1,twist1,syf2,bcl2,gli3,bmp6,lyn,eya1,has2,cd4,fgfr2,hpse2,cxcl12,ar,prkd1,thbs1,itgax,stat1,slc39a10,hdac4,dpp4,igfbp2,rpl23,itgb3,nfatc…	2.65573
215	0.00249393	GO:0014070	response to organic cyclic compound	slit2,hpgd,nr3c2,pgrmc2,tet2,tacr3,h2afz,snca,rest,anxa3,dgkq,klf4,mef2c,nr2f1,htr1a,isl1,hcn1,ghr,prkaa1,mbd2,smad2,runx1,htr1f,nr0b1,ptpru,rap1a,slc16a1,notch1,htr2a,shmt2,vdr,ufm1,fdx1,p2ry2,gabra1,drd1,msx2,cnot2,acsbg1,duox1,aqp9,znf703,adm,foxf1,tgfb2,bmp2,bcl2l11,oprm1,foxo3,apob,ptk2b,htr5a,insig1,ahr,bcl2,bmp6,lyn,hnf4g,cd4,rnls,eng,ar,thbs1,sstr5,idh1,stat1,nr4a2,cxcr4,rqcd1,igfbp2,pmep…	2.60312
216	0.0025119	GO:0033993	response to lipid	slit2,hpgd,nr3c2,pgrmc2,tacr3,h2afz,snca,rest,lpl,anxa3,klf4,xbp1,mef2c,nr2f1,cd180,isl1,ghr,prkaa1,mbd2,smad2,runx1,nr0b1,fabp3,ptpru,mapkapk2,notch1,vdr,ufm1,fdx1,wnt11,mgst2,msx2,cnot2,acsbg1,tjp1,znf703,adm,sigirr,tgfb2,bcl2l11,oprm1,foxo3,osr1,apob,ptk2b,wnt9a,htr5a,insig1,adnp2,ahr,bcl2,bmp6,lyn,hnf4g,cd4,fgfr2,mapk8,eng,ar,thbs1,sstr5,idh1,nr4a2,rqcd1,igfbp2,pmepa1,phb,sstr2,gata4,slc6a1,r…	2.6
217	0.00268084	GO:0060412	ventricular septum morphogenesis	slit2,gja5,robo1,notch1,wnt11,tgfb2,prox1,hey2,fzd1,hey1,fgfr2,wnt5a	2.57173
218	0.00269551	GO:0071363	cellular response to growth factor stimulus	fgfr3,slit2,hpgd,sfrp2,spry1,snca,klf4,myh6,fbn2,sema6a,foxd1,mef2c,adamts12,tcf4,smad2,skor2,robo1,dstyk,mapkapk2,rap1a,notch1,gtf2f2,col2a1,fgf9,pdgfd,msx2,pcsk6,znf703,egr3,cd44,cyr61,flrt1,cdh5,tgfb2,bmp2,foxo3,map3k7,bmp5,fgf12,nrp1,zeb1,fzd1,twist1,bmp6,ldlrad4,gdf6,has2,fgfr2,zfyve27,ski,eng,prkd1,thbs1,acvr2a,pmepa1,itgb3,csnk1d,dok5,myocd,gata4,sox5,adamtsl2,adamts3,vegfa,sox6,emilin1,wn…	2.56936
219	0.00270765	GO:0022604	regulation of cell morphogenesis	slit2,ppp3ca,enam,ptprs,ptprd,wdr36,sema6a,skor2,dscam,robo1,plxna2,slitrk1,csf1r,reln,sema3a,lingo1,dvl2,lrrc4c,cd44,lpar3,sema3f,cpne5,fezf2,bves,phip,rims1,nlgn1,ptk2b,nrp1,myo10,cdh2,has2,zfyve27,cxcl12,zswim8,l1cam,fgf13,crabp2,zeb2,cxcr4,srcin1,pdzd8,gas2,syt4,olfm1,eif4g2,fgd4,dnm1l,cspg5,vegfa,wnt5a	2.56741
220	0.00285301	GO:0072006	nephron development	prom1,dchs2,lif,foxd1,mef2c,gdnf,notch1,pdgfd,wnt11,podxl,sall1,bmp2,wwtr1,osr1,bcl2,gli3,eya1,calb1,angpt1,fmn1,stat1,wnt7b,vegfa	2.5447
221	0.0029752	GO:0099537	trans-synaptic signaling	sorcs2,npy5r,ppp3ca,snca,ptprs,slc24a2,ptprd,cntnap4,stx2,cartpt,mef2c,htr1a,plk2,slc1a3,gdnf,cplx4,igsf11,htr1f,kiss1,rap1a,itpr3,rims3,pcdh17,pcdh8,htr2a,gabra1,drd1,ppfia2,kcnd2,reln,pclo,egr3,lrrc4c,slc1a2,lpar3,cdh11,cadps,arid1b,oprm1,rims1,nlgn1,fgf12,ptk2b,htr5a,nrn1,gabbr2,amph,cdh2,calb1,sybu,kcnq3,shank1,eif2ak4,stx1b,cacng3,grin2a,hrh3,slc32a1,pmp22,slc6a1,syt4,slc17a6,dnm1l,cspg5,crh…	2.52648
222	0.00300056	GO:0048523	negative regulation of cellular process	vax2,rab11fip5,maea,ctbp1,atoh8,ldb2,sorcs2,slit2,slc25a4,cdkn2aip,hpgd,npy5r,rbm46,sfrp2,spry1,egf,ank2,mad2l1,prdm5,ppp3ca,snca,ptprs,rest,lpl,dusp4,ptpn13,dgkq,slc24a2,klf4,c9orf72,cdc14b,inpp5j,lif,slc8b1,apc,patz1,tmem132d,xbp1,fbn2,znf608,sema6a,enc1,foxd1,cartpt,mef2c,nr2f1,plk2,isl1,ghr,prkaa1,gdnf,prlr,adamts12,lman1,tcf4,mbd2,smad2,skor2,zbtb20,dscam,ets2,runx1,adamts1,robo1,ankrd13b,ta…	2.5228
223	0.00301527	GO:0048565	digestive tract development	sfrp2,pcsk5,smad2,notch1,tbx2,cdx2,fgf9,wnt11,alx4,sall1,foxf1,tgfb2,foxf2,bcl2,gli3,fgfr2,clmp,myocd,gata4,gli2,ccdc40,wnt5a	2.52067
224	0.00324774	GO:0016049	cell growth	slit2,sorbs2,cdkn2aip,sfrp2,kiaa1109,ptprs,c9orf72,wdr36,sema6a,mex3c,dscam,st7l,auts2,wnt11,sema3a,lpar3,flrt1,osgin1,pappa2,sema3f,cpne5,tgfb2,rims1,bcl6,ptk2b,nrp1,adnp2,nrn1,bcl2,kazald1,zfyve27,cxcl12,ei24,l1cam,fgf13,slc44a4,eif2ak4,crabp2,zeb2,cxcr4,phb,myocd,gata4,syt4,olfm1,eaf2,eif4g2,igfbp4,vegfa,adam15,wnt5a	2.48842
225	0.00327939	GO:0048588	developmental cell growth	slit2,sorbs2,ptprs,c9orf72,wdr36,sema6a,mex3c,dscam,auts2,sema3a,lpar3,flrt1,sema3f,cpne5,rims1,nrp1,nrn1,zfyve27,cxcl12,l1cam,fgf13,eif2ak4,crabp2,zeb2,cxcr4,gata4,syt4,olfm1,eif4g2,vegfa,wnt5a	2.48421
226	0.00333857	GO:0021953	central nervous system neuron differentiation	slit2,sfrp2,dmrt3,otp,isl1,skor2,robo1,tsku,csf1r,drd1,sema3a,pax6,sall1,cdh11,fezf2,prox1,nrp1,fzd1,gli3,fgfr2,satb2,nr4a2,zeb2,csnk1d,b4galt6,gli2,wnt5a	2.47644
227	0.0034821	GO:0007610	behavior	dctn1,npy5r,tacr3,snca,musk,slc24a2,dmrta1,dmrt3,cntnap4,camk4,cartpt,mef2c,htr1a,plk2,prkaa1,slc1a3,gdnf,mbd2,dscam,grpr,slc16a1,itpr3,slitrk1,pcdh17,htr2a,nmur2,drd1,kcnd2,reln,olfm2,slc1a2,negr1,gpr88,fezf2,oprm1,gfral,nlgn1,fgf12,bcl2,calb1,cxcl12,shank1,tsc1,strbp,fgf13,eif2ak4,thbs1,grin2a,hdac4,dpp4,nr4a2,asic4,dynlrb1,ndrg4,slc6a1,syt4,glp1r,thra,prlhr	2.45816
228	0.00362568	GO:0051128	regulation of cellular component organization	dctn1,ctbp1,afap1,slit2,cep135,cdkn2aip,sfrp2,kiaa1109,egf,mad2l1,ppp3ca,snca,enam,ptprs,abhd17a,sept11,dgkq,musk,klf4,c9orf72,ptprd,cdc14b,inpp5j,lif,apc,wdr36,clip1,sema6a,enc1,mef2c,nr2f1,plk2,isl1,prkaa1,lman1,skor2,dscam,runx1,robo1,ankrd13b,taok1,rtn4rl1,rpa1,plxna2,rspo1,rap1a,st7l,notch1,ap2b1,auts2,frmpd4,slitrk1,pcdh8,wnt11,csf1r,msx2,cnot2,cntn1,reln,sema3a,podxl,lingo1,scamp5,tjp1,dvl…	2.44061
229	0.0037075	GO:0099536	synaptic signaling	sorcs2,npy5r,ppp3ca,snca,ptprs,slc24a2,ptprd,cntnap4,stx2,cartpt,mef2c,htr1a,plk2,slc1a3,gdnf,cplx4,igsf11,htr1f,kiss1,rap1a,itpr3,rims3,pcdh17,pcdh8,htr2a,gabra1,drd1,ppfia2,kcnd2,reln,pclo,egr3,lrrc4c,slc1a2,lpar3,cdh11,cadps,arid1b,oprm1,rims1,nlgn1,fgf12,ptk2b,htr5a,nrn1,gabbr2,amph,cdh2,calb1,sybu,kcnq3,shank1,ly6g6d,eif2ak4,stx1b,cacng3,grin2a,hrh3,slc32a1,pmp22,slc6a1,syt4,slc17a6,dnm1l,cs…	2.43092
230	0.00377119	GO:1905314	semi-lunar valve development	slit2,gja5,robo1,notch1,tgfb2,hey2,twist1,hey1,snai1,gata4,emilin1	2.42352
231	0.00379524	GO:0198738	cell-cell signaling by wnt	vax2,sfrp2,egf,ppp3ca,klf4,myh6,apc,isl1,prkaa1,mbd2,runx1,ptpru,rspo1,notch1,ap2b1,gpc6,amer2,fgf9,tsku,wnt11,znf703,dvl2,sall1,ror1,trabd2b,prickle2,psmd6,bmp2,oprm1,foxo3,map3k7,wwtr1,wnt9a,fzd1,gli3,rbms3,cdh2,rspo2,fgfr2,tmem88,ski,nr4a2,zeb2,igfbp2,csnk1d,daam2,psmd5,ctr9,wnt7b,igfbp4,barx1,tcf7l2,wnt5a	2.42076
232	0.00381404	GO:0003181	atrioventricular valve morphogenesis	notch1,cyr61,tgfb2,bmp2,hey2,twist1,hey1,gata4,olfm1	2.41861
233	0.00388507	GO:0098916	anterograde trans-synaptic signaling	sorcs2,npy5r,ppp3ca,snca,ptprs,slc24a2,cntnap4,stx2,cartpt,mef2c,htr1a,plk2,slc1a3,gdnf,cplx4,igsf11,htr1f,kiss1,rap1a,itpr3,rims3,pcdh17,pcdh8,htr2a,gabra1,drd1,ppfia2,kcnd2,reln,pclo,egr3,lrrc4c,slc1a2,lpar3,cdh11,cadps,arid1b,oprm1,rims1,nlgn1,fgf12,ptk2b,htr5a,nrn1,gabbr2,amph,cdh2,calb1,sybu,kcnq3,shank1,eif2ak4,stx1b,cacng3,grin2a,hrh3,slc32a1,pmp22,slc6a1,syt4,slc17a6,dnm1l,cspg5,crhr2,erc…	2.4106
234	0.00388507	GO:0007268	chemical synaptic transmission	sorcs2,npy5r,ppp3ca,snca,ptprs,slc24a2,cntnap4,stx2,cartpt,mef2c,htr1a,plk2,slc1a3,gdnf,cplx4,igsf11,htr1f,kiss1,rap1a,itpr3,rims3,pcdh17,pcdh8,htr2a,gabra1,drd1,ppfia2,kcnd2,reln,pclo,egr3,lrrc4c,slc1a2,lpar3,cdh11,cadps,arid1b,oprm1,rims1,nlgn1,fgf12,ptk2b,htr5a,nrn1,gabbr2,amph,cdh2,calb1,sybu,kcnq3,shank1,eif2ak4,stx1b,cacng3,grin2a,hrh3,slc32a1,pmp22,slc6a1,syt4,slc17a6,dnm1l,cspg5,crhr2,erc…	2.4106
235	0.00410632	GO:0040017	positive regulation of locomotion	atoh8,slit2,egf,tacr3,ppp3ca,anxa3,apc,xbp1,sema6a,plk2,dscam,adamts1,notch1,fgf9,pdgfd,wnt11,csf1r,cxcl14,sh3rf2,drd1,reln,sema3a,podxl,duox1,znf703,cyr61,cdh13,foxf1,s1pr1,sema3f,tgfb2,prox1,bmp2,bves,cga,ptk2b,nrp1,twist1,hdac9,bcl2,capn7,lyn,angpt1,has2,cxcl12,cd99l2,prkd1,thbs1,itgax,hdac4,tnfaip6,cxcr4,itgb3,snai1,smc3,vegfa,stx3,wnt5a	2.38655
236	0.0041452	GO:0021872	forebrain generation of neurons	slit2,otp,robo1,csf1r,drd1,sema3a,pax6,sall1,fezf2,prox1,nrp1,gli3,fgfr2,satb2,wnt5a	2.38245
237	0.00418212	GO:0042127	regulation of cell population proliferation	fgfr3,ctbp1,atoh8,hpgd,npy5r,sfrp2,spry1,egf,rest,klf4,lif,apc,xbp1,otp,mef2c,htr1a,isl1,prkaa1,gdnf,mbd2,smad2,skor2,adamts1,robo1,grpr,fabp3,ptpru,kiss1,notch1,tbx2,htr2a,shmt2,vdr,cdx2,fgf9,pdgfd,acer3,wnt11,ccnd2,csf1r,msx2,utp20,nuak1,znf703,egr3,dvl2,adm,pax6,il34,cyr61,osgin1,cdh5,cdh13,foxf1,cdc7,s1pr1,fezf2,tgfb2,ptpn14,prox1,bmp2,hey2,oprm1,rps6ka2,foxo3,phip,cga,bmp5,bcl6,wwtr1,osr1,pt…	2.3786
238	0.00422298	GO:0007548	sex differentiation	slit2,sfrp2,dmrta1,dmrt3,patz1,hsd17b4,adamts1,nr0b1,fgf9,sema3a,sall1,tgfb2,bcl2l11,foxo3,cga,bmp5,osr1,foxf2,bcl2,bmp6,ar,lfng,idh1,acvr2a,rqcd1,tfap2c,gata4,gas2,nr5a1,adcyap1r1,vegfa,wdr19,adam15,wnt5a	2.37438
239	0.00431951	GO:0050768	negative regulation of neurogenesis	slit2,ppp3ca,ptprs,rest,inpp5j,sema6a,nr2f1,plk2,isl1,rtn4rl1,srgap2,notch1,sema3a,hmg20a,lingo1,pax6,sema3f,fezf2,foxo3,nlgn1,nrp1,gli3,hey1,asap1,ski,tsc1,cdk5rap2,fgf13,eif2ak4,stx1b,pmp22,daam2,syt4,dennd5a,vax1,wnt5a	2.36457
240	0.00433328	GO:0007517	muscle organ development	evc,frg1,ppp3ca,myh6,lif,xbp1,mef2c,isl1,prkaa1,tnnt2,notch1,tbx2,fgf9,pitx1,itga11,egr3,alx4,s1pr1,disp1,tgfb2,prox1,bmp2,hey2,vgll2,bves,naca,svil,fzd1,twist1,hdac9,bcl2,msc,fgfr2,ski,eng,actc1,casq1,rbfox1,hdac4,myocd,rxra,csrp3,vax1,sox6,wnt5a	2.36318
241	0.00462797	GO:0048583	regulation of response to stimulus	fgfr3,clnk,evc,afap1,slit2,arap2,cdkn2aip,fbxo8,npy5r,sfrp2,nr3c2,spry1,egf,alpk1,ppp3ca,tspan5,snca,ptprs,rest,lpl,dusp4,cfd,ptpn13,anxa3,ugcg,dgkq,klf4,c9orf72,gadd45g,lif,slc8b1,apc,fbxl17,xbp1,fbn2,sema6a,foxd1,cartpt,mef2c,cd180,plk2,isl1,ghr,prkaa1,gdnf,prlr,adamts12,tcf4,mbd2,smad2,skor2,arhgap31,igsf11,dscam,sh3bgr,runx1,robo1,taok1,rtn4rl1,rpa1,nr0b1,ppef1,ptpru,rspo1,kiss1,dstyk,srgap2,…	2.33461
242	0.00499409	GO:0099003	vesicle-mediated transport in synapse	kiaa1109,snca,dgkq,stx2,cplx4,rap1a,rims3,ap2b1,pcdh17,htr2a,drd1,ppfia2,pclo,pld2,cadps,rims1,nlgn1,nrn1,amph,cdh2,stx1b,itgb3,slc32a1,syt4,slc17a6,dnm1l,cspg5,erc2,stx3	2.30154
243	0.00510921	GO:0008283	cell population proliferation	fgfr3,ctbp1,atoh8,hpgd,npy5r,dchs2,sfrp2,ednra,spry1,egf,rest,klf4,rpgrip1,lif,apc,xbp1,otp,mef2c,cd180,htr1a,isl1,prkaa1,gdnf,mbd2,smad2,skor2,runx1,adamts1,robo1,grpr,fabp3,ptpru,kiss1,notch1,tbx2,htr2a,shmt2,vdr,cdx2,fgf9,pdgfd,tenm4,acer3,wnt11,ccnd2,csf1r,msx2,utp20,nuak1,znf703,egr3,dvl2,adm,pax6,il34,cyr61,osgin1,cdh5,cdh13,foxf1,tspan1,cdc7,s1pr1,fezf2,tgfb2,ptpn14,prox1,bmp2,hey2,oprm1,r…	2.29165
244	0.00546189	GO:0010769	regulation of cell morphogenesis involved in differentiation	slit2,ppp3ca,ptprs,ptprd,wdr36,sema6a,skor2,dscam,robo1,plxna2,slitrk1,reln,sema3a,lingo1,lrrc4c,lpar3,sema3f,fezf2,nlgn1,nrp1,cdh2,has2,zfyve27,cxcl12,zswim8,l1cam,fgf13,crabp2,zeb2,srcin1,olfm1,eif4g2,dnm1l,cspg5,vegfa,wnt5a	2.26266
245	0.00548325	GO:0007368	determination of left/right symmetry	pcsk5,mef2c,smad2,notch1,tbx2,pcsk6,rpgrip1l,foxf1,disp1,armc4,dnah5,rttn,eng,acvr2a,ndrg4,daam2,gata4,ccdc40,sox18,wnt5a	2.26096
246	0.00566893	GO:0003188	heart valve formation	gja5,notch1,hey2,twist1,hey1,gata4,olfm1	2.2465
247	0.00588775	GO:0001701	in utero embryonic development	rbm46,ednra,myh6,lif,myo18b,smad2,notch1,cdx2,cnot2,tjp1,adm,cyr61,rpgrip1l,foxf1,bmp2,hey2,bcl2l11,bmp5,apob,xrcc2,twist1,syf2,gli3,hey1,angpt1,zfat,fgfr2,ar,krt19,sall4,snai1,rxra,ctr9,wnt7b,med21,gli2,vegfa,sox6,wdr19,sox18	2.23005
248	0.0066174	GO:0048592	eye morphogenesis	vax2,prom1,fat1,rpgrip1,fbn2,hcn1,dscam,tbx2,tsku,fjx1,pax6,prox1,wnt9a,zeb1,twist1,foxf2,bcl2,gli3,calb1,ski,ttc8,vegfa,wnt5a	2.17931
249	0.00680779	GO:0099504	synaptic vesicle cycle	kiaa1109,snca,dgkq,stx2,cplx4,rap1a,rims3,pcdh17,htr2a,drd1,ppfia2,pclo,pld2,cadps,rims1,nlgn1,nrn1,amph,cdh2,stx1b,slc32a1,syt4,slc17a6,dnm1l,cspg5,erc2,stx3	2.16699
250	0.00744756	GO:0016055	Wnt signaling pathway	vax2,sfrp2,egf,ppp3ca,klf4,myh6,apc,isl1,prkaa1,mbd2,runx1,ptpru,rspo1,notch1,ap2b1,gpc6,amer2,fgf9,tsku,wnt11,znf703,dvl2,sall1,ror1,trabd2b,prickle2,psmd6,bmp2,foxo3,map3k7,wwtr1,wnt9a,fzd1,gli3,rbms3,cdh2,rspo2,fgfr2,tmem88,ski,nr4a2,zeb2,igfbp2,csnk1d,daam2,psmd5,ctr9,wnt7b,igfbp4,barx1,tcf7l2,wnt5a	2.12799
251	0.00767243	GO:0031346	positive regulation of cell projection organization	slit2,cep135,ptprd,apc,enc1,dscam,robo1,plxna2,rap1a,auts2,slitrk1,cntn1,reln,dvl2,lpar3,negr1,nckipsd,cpne5,bmp5,rims1,nlgn1,ptk2b,nrp1,fzd1,lyn,zfyve27,cxcl12,shank1,l1cam,prkd1,crabp2,hdac4,zeb2,cxcr4,ndrg4,sept9,syt4,eif4g2,dnm1l,vegfa,epo,wnt5a	2.11507
252	0.00841245	GO:0045446	endothelial cell differentiation	atoh8,ptprs,marveld2,rap1a,notch1,tjp1,cdh5,s1pr1,prox1,hey2,nrp1,zeb1,bmp6,hey1,eng,cxcr4,scube1,wnt7b,sox18	2.07508
253	0.0085561	GO:0065009	regulation of molecular function	fgfr3,ldb2,grpel1,slit2,arap2,sfrp2,ednra,spry1,egf,ank2,mad2l1,ppp3ca,snca,rest,lpl,dusp4,anxa3,dgkq,klf4,c9orf72,pcsk5,cdc14b,gadd45g,myh6,lif,apc,tmem132d,cartpt,mef2c,glrx,plk2,isl1,ghr,prkaa1,gdnf,prlr,mbd2,smad2,arhgap31,robo1,taok1,nr0b1,plxna2,dstyk,srgap2,mapkapk2,rap1a,ppp1r12b,tnnt2,notch1,ndfip2,htr2a,vdr,ccna1,gria4,pdgfd,sytl2,wnt11,ccnd2,nmur2,csf1r,mgst2,prmt8,sh3rf2,ppp2r2b,drd1,…	2.06772
254	0.00902284	GO:0006796	phosphate-containing compound metabolic process	fastkd5,gfra4,fgfr3,ctbp1,ldb2,stk32b,slit2,dctd,npy5r,sfrp2,spry1,egf,alpk1,ppp3ca,snca,ptprs,lpl,dusp4,isyna1,ptpn13,gne,dgkq,musk,klf4,c9orf72,ptprd,cdc14b,gadd45g,myh6,inpp5j,lif,apc,camk4,tmem132d,hsd17b4,sema6a,cartpt,mef2c,plk2,isl1,ghr,prkaa1,gdnf,prlr,smad2,zbtb20,dscam,erg,epha6,robo1,taok1,akap10,ppef1,dhdds,fabp3,ptpru,rspo1,kiss1,dstyk,mapkapk2,rap1a,mapk13,notch1,htr2a,shmt2,ccna1,f…	2.04466
255	0.0094803	GO:0048880	sensory system development	vax2,prom1,fat1,klf4,rpgrip1,fbn2,isl1,hcn1,rax,dscam,tbx2,col4a1,fgf9,tsku,sema3a,fjx1,pax6,rpgrip1l,tgfb2,ush2a,prox1,wnt9a,nrp1,zeb1,twist1,foxf2,bcl2,gli3,bmp6,calb1,ski,bloc1s3,slc44a4,ttc8,zeb2,rxra,vax1,wnt7b,vegfa,wdr19,wnt5a	2.02318
256	0.0102206	GO:0045892	negative regulation of transcription, DNA-templated	vax2,ctbp1,atoh8,ldb2,sfrp2,prdm5,snca,rest,klf4,patz1,znf608,foxd1,mef2c,nr2f1,isl1,tcf4,mbd2,smad2,skor2,zbtb20,ets2,runx1,nr0b1,sox13,notch1,tbx2,vdr,cdx2,fgf9,wnt11,pitx1,msx2,cnot2,chchd3,hmg20a,znf703,pax6,sall1,foxf1,depdc1,qars,fezf2,prox1,bmp2,hey2,foxo3,bcl6,mcph1,wwtr1,tfdp2,myt1l,osr1,naca,zmynd11,zeb1,fzd1,twist1,hdac9,ahr,foxf2,gli3,bmp6,msc,hey1,fgfr2,ski,phf8,ar,stat1,satb2,hdac4,…	1.99052
257	0.0105199	GO:0051716	cellular response to stimulus	gfra4,vax2,dctn1,rab11fip5,fgfr3,atoh8,bod1l1,rab28,clnk,stk32b,evc,afap1,sorcs2,sod3,slit2,arap2,sorbs2,cdkn2aip,neil3,hpgd,fbxo8,npy5r,sfrp2,nr3c2,ednra,pgrmc2,spry1,egf,alpk1,ank2,prdm5,tacr3,ppp3ca,h2afz,tspan5,unc5c,snca,ptprs,rest,lpl,dusp4,cfd,ptpn13,anxa3,ugcg,dgkq,musk,klf4,mtap,c9orf72,ptprd,cdc14b,gadd45g,myh6,lif,slc8b1,apc,camk4,fbxl17,rab36,stx2,xbp1,fbn2,sema6a,foxd1,cartpt,mef2c,n…	1.97799
258	0.0108911	GO:0048704	embryonic skeletal system morphogenesis	mef2c,smad2,col2a1,alx4,osr1,wnt9a,zeb1,twist1,gli3,eya1,fgfr2,satb2,hoxb1,hoxb2,hoxb4,tbx15,wdr19	1.96293
259	0.0110549	GO:0021761	limbic system development	ptprs,anxa3,otp,rax,nr0b1,drd1,reln,sema3a,fezf2,prox1,htr5a,nrp1,gli3,fgfr2,tsc1,fgf13,zeb2,slc32a1,emx2	1.95645
260	0.011476	GO:1990138	neuron projection extension	slit2,ptprs,c9orf72,wdr36,sema6a,dscam,auts2,sema3a,flrt1,sema3f,cpne5,rims1,nrp1,nrn1,zfyve27,cxcl12,l1cam,eif2ak4,cxcr4,syt4,olfm1,eif4g2,vegfa,wnt5a	1.94021
261	0.0116018	GO:0048519	negative regulation of biological process	gfra4,vax2,rab11fip5,fgfr3,maea,ctbp1,atoh8,ldb2,sorcs2,slit2,slc25a4,cdkn2aip,hpgd,npy5r,rbm46,sfrp2,spry1,egf,ank2,mad2l1,prdm5,ppp3ca,snca,ptprs,rest,lpl,dusp4,abhd17a,ptpn13,dgkq,slc24a2,klf4,c9orf72,cdc14b,inpp5j,lif,slc8b1,apc,patz1,tmem132d,xbp1,fbn2,znf608,sema6a,enc1,foxd1,cartpt,rps23,mef2c,nr2f1,lnpep,plk2,isl1,ghr,prkaa1,gdnf,prlr,adamts12,lman1,tcf4,mbd2,rpl17,smad2,skor2,zbtb20,gja5…	1.93548
262	0.0117943	GO:0048638	regulation of developmental growth	fgfr3,sfrp2,ptprs,musk,myh6,wdr36,sema6a,mef2c,ghr,dscam,notch1,tbx2,fgf9,sema3a,lpar3,sema3f,cpne5,prox1,hey2,bcl2l11,cga,rims1,pls1,naca,nrp1,bcl2,fgfr2,zfyve27,cxcl12,l1cam,ar,fgf13,crabp2,cxcr4,syt4,olfm1,eif4g2,vegfa,wnt5a	1.92833
263	0.0118968	GO:0110110	positive regulation of animal organ morphogenesis	spry1,enam,lif,xbp1,gdnf,robo1,notch1,vdr,tgfb2,bmp2,naca,twist1,fgfr2,eng,ar,vegfa	1.92457
264	0.0120615	GO:0022612	gland morphogenesis	xbp1,notch1,tbx2,vdr,csf1r,msx2,sema3a,pax6,tgfb2,prox1,nrp1,bcl2,gli3,fgfr2,ar,crip1,tgm2,rxra,gli2,wnt5a	1.9186
265	0.012639	GO:0048593	camera-type eye morphogenesis	prom1,fat1,hcn1,dscam,tbx2,tsku,fjx1,pax6,prox1,wnt9a,zeb1,twist1,foxf2,gli3,calb1,ski,ttc8,vegfa,wnt5a	1.89829
266	0.0135942	GO:0045137	development of primary sexual characteristics	slit2,sfrp2,dmrta1,patz1,hsd17b4,adamts1,nr0b1,fgf9,sema3a,sall1,tgfb2,bcl2l11,foxo3,cga,osr1,bcl2,ar,lfng,idh1,acvr2a,tfap2c,gata4,gas2,nr5a1,adcyap1r1,vegfa,wdr19,adam15,wnt5a	1.86665
267	0.0138181	GO:0016310	phosphorylation	fastkd5,gfra4,fgfr3,ctbp1,ldb2,stk32b,slit2,npy5r,sfrp2,spry1,egf,alpk1,snca,dusp4,ptpn13,gne,dgkq,musk,klf4,c9orf72,gadd45g,inpp5j,lif,apc,camk4,sema6a,cartpt,mef2c,plk2,isl1,ghr,prkaa1,gdnf,prlr,smad2,zbtb20,dscam,erg,epha6,robo1,taok1,akap10,rspo1,kiss1,dstyk,mapkapk2,rap1a,mapk13,notch1,htr2a,shmt2,ccna1,fgf9,pdgfd,wnt11,ccnd2,csf1r,sh3rf2,drd1,nuak1,cntn1,reln,sema3a,trpm7,dvl2,ephb4,ipo7,cd…	1.85955
268	0.0141753	GO:0051270	regulation of cellular component movement	atoh8,ldb2,slit2,sfrp2,egf,ank2,tacr3,ppp3ca,unc5c,anxa3,klf4,slc8b1,apc,xbp1,sema6a,mef2c,plk2,gja5,dscam,adamts1,robo1,plxna2,ptpru,srgap2,tnnt2,notch1,fgf9,pdgfd,wnt11,csf1r,cxcl14,sh3rf2,drd1,reln,sema3a,podxl,duox1,znf703,pax6,cyr61,osgin1,cdh13,foxf1,s1pr1,sema3f,adamts9,fezf2,tgfb2,prox1,bmp2,foxo3,cga,bmp5,bcl6,dock10,ptk2b,nrp1,armc4,twist1,hdac9,bcl2,capn7,ldlrad4,lyn,angpt1,has2,cxcl12…	1.84847
269	0.014442	GO:0006928	movement of cell or subcellular component	gfra4,dctn1,atoh8,ldb2,slit2,fat1,sfrp2,egf,ank2,tacr3,ppp3ca,unc5c,anxa3,klf4,myh6,slc8b1,apc,xbp1,sema6a,foxd1,mef2c,plk2,isl1,gdnf,adamts12,gja5,dscam,adamts1,epha6,robo1,plxna2,sdc3,ptpru,srgap2,slc16a1,tnnt2,anks1a,notch1,auts2,gpc6,fgf9,pdgfd,wnt11,csf1r,cxcl14,sh3rf2,drd1,msx2,reln,cacna2d1,sema3a,podxl,duox1,znf703,itga11,egr3,pld2,ephb4,cd44,pax6,siah1,cyr61,osgin1,dynlrb2,cdh13,foxf1,sl…	1.84037
270	0.0146667	GO:0090092	regulation of transmembrane receptor protein serine/threonine kinase signaling pathway	sfrp2,fbn2,foxd1,smad2,skor2,notch1,fgf9,msx2,pcsk6,znf703,cyr61,tgfb2,bmp2,bmp5,wwtr1,zeb1,fzd1,bmp6,ldlrad4,gdf6,ski,eng,thbs1,acvr2a,pmepa1,myocd,gata4,adamtsl2,emilin1,wnt5a	1.83367
271	0.0147054	GO:0060993	kidney morphogenesis	fras1,lif,foxd1,gdnf,wnt11,sall1,bmp2,wwtr1,osr1,bcl2,gli3,eya1,calb1,fmn1,stat1,wnt7b,vegfa	1.83252
272	0.014918	GO:1902667	regulation of axon guidance	slit2,sema6a,dscam,sema3a,sema3f,fezf2,nrp1,cxcl12,zswim8,vegfa,wnt5a	1.82629
273	0.0152279	GO:0010718	positive regulation of epithelial to mesenchymal transition	isl1,smad2,notch1,znf703,tgfb2,bmp2,wwtr1,twist1,eng,snai1,olfm1,tcf7l2	1.81736
274	0.0157675	GO:0006793	phosphorus metabolic process	fastkd5,gfra4,fgfr3,ctbp1,ldb2,stk32b,slit2,dctd,npy5r,sfrp2,spry1,egf,alpk1,ppp3ca,snca,ptprs,lpl,dusp4,isyna1,ptpn13,gne,dgkq,musk,klf4,c9orf72,ptprd,cdc14b,gadd45g,myh6,inpp5j,lif,apc,camk4,tmem132d,hsd17b4,sema6a,cartpt,mef2c,plk2,isl1,ghr,prkaa1,gdnf,prlr,smad2,zbtb20,dscam,erg,epha6,robo1,taok1,akap10,ppef1,dhdds,fabp3,ptpru,rspo1,kiss1,dstyk,mapkapk2,rap1a,mapk13,notch1,htr2a,shmt2,ccna1,f…	1.80224
275	0.015951	GO:0048705	skeletal system morphogenesis	fgfr3,sfrp2,fbn2,mef2c,ghr,smad2,col2a1,msx2,alx4,pappa2,osr1,wnt9a,insig1,zeb1,twist1,gli3,bmp6,eya1,has2,fgfr2,ski,fmn1,satb2,hoxb1,hoxb2,hoxb4,thra,tbx15,wdr19,col11a2	1.79721
276	0.0163551	GO:0001708	cell fate specification	sfrp2,dmrt3,apc,isl1,notch1,tenm4,pax6,myt1l,nrp1,gli3,eya1,ar,eya2,gli2,sox6,sox18	1.78635
277	0.0175162	GO:0009855	determination of bilateral symmetry	pcsk5,mef2c,smad2,notch1,tbx2,pcsk6,rpgrip1l,foxf1,disp1,armc4,dnah5,rttn,eng,acvr2a,ndrg4,daam2,gata4,ccdc40,sox18,wnt5a	1.75656
278	0.0178791	GO:0051961	negative regulation of nervous system development	slit2,ppp3ca,ptprs,rest,inpp5j,sema6a,nr2f1,plk2,isl1,rtn4rl1,srgap2,notch1,sema3a,hmg20a,lingo1,pax6,sema3f,fezf2,foxo3,nlgn1,nrp1,gli3,hey1,asap1,ski,tsc1,cdk5rap2,fgf13,eif2ak4,stx1b,pmp22,daam2,syt4,dennd5a,vax1,wnt5a	1.74765
279	0.0181882	GO:0033674	positive regulation of kinase activity	fgfr3,egf,snca,dgkq,gadd45g,cartpt,mef2c,ghr,prkaa1,prlr,robo1,taok1,dstyk,mapkapk2,rap1a,htr2a,pdgfd,wnt11,ccnd2,csf1r,reln,dvl2,cd44,cyr61,lpar3,adcy7,tgfb2,prox1,bmp2,map3k7,gfral,ptk2b,prkag1,map3k8,znf622,lyn,angpt1,rplp1,cd4,fgf13,ccnk,prkd1,thbs1,socs1,zeb2,cxcr4,srcin1,itgb3,ube2v1,pik3r5,xrcc5,wnt7b,vegfa,epo,wnt5a	1.74021
280	0.0187496	GO:0090287	regulation of cellular response to growth factor stimulus	slit2,sfrp2,spry1,fbn2,sema6a,foxd1,adamts12,tcf4,smad2,skor2,robo1,dstyk,notch1,fgf9,msx2,pcsk6,znf703,cyr61,zeb1,fzd1,ldlrad4,ski,eng,thbs1,pmepa1,itgb3,dok5,myocd,gata4,adamtsl2,adamts3,vegfa,emilin1,wnt5a	1.72701
281	0.0191307	GO:0051272	positive regulation of cellular component movement	atoh8,egf,tacr3,ppp3ca,anxa3,apc,xbp1,sema6a,plk2,dscam,adamts1,notch1,fgf9,pdgfd,wnt11,csf1r,cxcl14,sh3rf2,drd1,reln,sema3a,podxl,duox1,znf703,cyr61,cdh13,foxf1,s1pr1,sema3f,tgfb2,prox1,bmp2,cga,bcl6,ptk2b,nrp1,twist1,hdac9,bcl2,capn7,lyn,angpt1,has2,cxcl12,cd99l2,prkd1,thbs1,itgax,hdac4,tnfaip6,cxcr4,itgb3,snai1,vegfa,wnt5a	1.71827
282	0.0197777	GO:0009799	specification of symmetry	pcsk5,mef2c,smad2,notch1,tbx2,pcsk6,rpgrip1l,foxf1,disp1,armc4,dnah5,rttn,eng,acvr2a,ndrg4,daam2,gata4,ccdc40,sox18,wnt5a	1.70382
283	0.0198297	GO:1903507	negative regulation of nucleic acid-templated transcription	vax2,ctbp1,atoh8,ldb2,sfrp2,prdm5,snca,rest,klf4,patz1,znf608,foxd1,mef2c,nr2f1,isl1,tcf4,mbd2,smad2,skor2,zbtb20,ets2,runx1,nr0b1,sox13,notch1,tbx2,vdr,cdx2,fgf9,wnt11,pitx1,msx2,cnot2,chchd3,hmg20a,znf703,pax6,sall1,cdyl2,foxf1,depdc1,qars,fezf2,prox1,rcor3,bmp2,hey2,foxo3,bcl6,mcph1,wwtr1,tfdp2,myt1l,osr1,naca,zmynd11,zeb1,fzd1,twist1,hdac9,ahr,foxf2,gli3,bmp6,msc,hey1,fgfr2,ski,phf8,ar,stat1,…	1.70268
284	0.0204835	GO:0007169	transmembrane receptor protein tyrosine kinase signaling pathway	gfra4,fgfr3,clnk,spry1,egf,snca,dgkq,musk,apc,sema6a,ghr,prkaa1,prlr,adamts12,tcf4,epha6,robo1,dstyk,mapkapk2,anks1a,ap2b1,col4a1,gtf2f2,fgf9,pdgfd,csf1r,ephb4,flrt1,cdh13,ror1,bmp2,snx5,foxo3,phip,gfral,bmp5,fgf12,ptk2b,nrp1,lyn,angpt1,gfra1,cd4,fgfr2,zfyve27,tsc1,mvb12b,ar,prkd1,thbs1,socs1,rqcd1,igfbp2,itgb3,dok5,ndrg4,myocd,csrp3,igfbp4,atp6v1e1,adamts3,vegfa,c2cd5,emilin1,wnt5a	1.68859
285	0.0207463	GO:0051145	smooth muscle cell differentiation	mef2c,notch1,fgf9,olfm2,adm,foxf1,hey2,zeb1,hey1,fgfr2,eng,nfatc2,myocd,ankrd17,vegfa	1.68306
286	0.0207463	GO:0021536	diencephalon development	otp,isl1,rax,nr0b1,pitx1,sema3a,pax6,sall1,bmp2,nrp1,nr4a2,zeb2,kcnc1,gli2,wnt5a	1.68306
287	0.0211846	GO:0051049	regulation of transport	rab11fip5,slc25a4,npy5r,ednra,egf,ank2,ppp3ca,snca,rest,lpl,anxa3,dgkq,lif,slc8b1,xbp1,cartpt,mef2c,glrx,htr1a,isl1,hcn1,prkaa1,gdnf,lman1,cplx4,gja5,ankrd13b,fabp3,rspo1,kiss1,rap1a,slc16a1,tnnt2,itpr3,notch1,rims3,ap2b1,rph3al,ndfip2,pcdh17,htr2a,gria4,p2ry2,sytl2,csf1r,drd1,ppfia2,cntn1,kcnd2,reln,cacna2d1,pclo,scamp5,pacsin3,slc1a2,ano1,lpar3,cdh13,foxf1,tspan1,arl6ip5,cadps,disp1,tgfb2,ptpn1…	1.67398
288	0.0211914	GO:1902679	negative regulation of RNA biosynthetic process	vax2,ctbp1,atoh8,ldb2,sfrp2,prdm5,snca,rest,klf4,patz1,znf608,foxd1,mef2c,nr2f1,isl1,tcf4,mbd2,smad2,skor2,zbtb20,ets2,runx1,nr0b1,sox13,notch1,tbx2,vdr,cdx2,fgf9,wnt11,pitx1,msx2,cnot2,chchd3,hmg20a,znf703,pax6,sall1,cdyl2,foxf1,depdc1,qars,fezf2,prox1,rcor3,bmp2,hey2,foxo3,bcl6,mcph1,wwtr1,tfdp2,myt1l,osr1,naca,zmynd11,zeb1,fzd1,twist1,hdac9,ahr,foxf2,gli3,bmp6,msc,hey1,fgfr2,ski,phf8,ar,stat1,…	1.67384
289	0.0215825	GO:0055008	cardiac muscle tissue morphogenesis	myh6,isl1,tnnt2,notch1,s1pr1,tgfb2,prox1,bmp2,hey2,fgfr2,eng,actc1,rxra,wnt5a	1.6659
290	0.0222503	GO:0048644	muscle organ morphogenesis	myh6,lif,isl1,tnnt2,notch1,s1pr1,tgfb2,prox1,bmp2,hey2,fzd1,fgfr2,eng,actc1,rxra,wnt5a	1.65266
291	0.0226565	GO:0035148	tube formation	atoh8,sfrp2,gdnf,notch1,podxl,dvl2,adm,tgfb2,prox1,bcl2l11,bmp5,osr1,fzd1,twist1,fgfr2,ski,tsc1,zeb2,sall4,tgm2,vegfa,wnt5a	1.64481
292	0.0226872	GO:0001657	ureteric bud development	slit2,spry1,foxd1,gdnf,smad2,wnt11,sall1,bmp2,sim1,osr1,bcl2,gli3,eya1,calb1,fgfr2,fmn1,vegfa	1.64422
293	0.0230166	GO:0008406	gonad development	slit2,sfrp2,dmrta1,patz1,hsd17b4,adamts1,nr0b1,fgf9,sema3a,sall1,tgfb2,bcl2l11,foxo3,cga,osr1,bcl2,ar,lfng,idh1,acvr2a,tfap2c,gata4,gas2,nr5a1,vegfa,wdr19,adam15,wnt5a	1.63796
294	0.0233296	GO:0010721	negative regulation of cell development	slit2,ppp3ca,ptprs,rest,inpp5j,sema6a,nr2f1,plk2,isl1,rtn4rl1,srgap2,notch1,sema3a,hmg20a,lingo1,pax6,sema3f,fezf2,foxo3,nlgn1,nrp1,bcl2,gli3,hey1,asap1,ski,tsc1,cdk5rap2,fgf13,eif2ak4,stx1b,pmp22,daam2,syt4,wee2,dennd5a,vax1,wnt5a	1.63209
295	0.0236951	GO:0040008	regulation of growth	fgfr3,slit2,cdkn2aip,sfrp2,kiaa1109,ptprs,musk,myh6,wdr36,sema6a,mef2c,ghr,igsf11,dscam,st7l,notch1,tbx2,fgf9,wnt11,sema3a,lpar3,osgin1,pappa2,sema3f,cpne5,tgfb2,prox1,hey2,bcl2l11,cga,rims1,bcl6,pls1,ptk2b,naca,nrp1,adnp2,bcl2,fgfr2,kazald1,zfyve27,cxcl12,ei24,l1cam,ar,fgf13,slc44a4,crabp2,socs1,cxcr4,igfbp2,phb,myocd,syt4,olfm1,eaf2,eif4g2,cspg5,igfbp4,vegfa,adam15,wnt5a	1.62534
296	0.0258106	GO:0051253	negative regulation of RNA metabolic process	vax2,ctbp1,atoh8,ldb2,rbm46,sfrp2,prdm5,ppp3ca,snca,rest,klf4,patz1,znf608,foxd1,mef2c,nr2f1,isl1,gdnf,tcf4,mbd2,smad2,skor2,zbtb20,ets2,runx1,nr0b1,sox13,mapkapk2,notch1,tbx2,vdr,cdx2,fgf9,wnt11,pitx1,msx2,cnot2,chchd3,hmg20a,znf703,pax6,sall1,cdyl2,foxf1,depdc1,qars,shq1,fezf2,prox1,rcor3,bmp2,hey2,foxo3,bcl6,mcph1,wwtr1,tfdp2,myt1l,osr1,naca,zmynd11,zeb1,fzd1,twist1,hdac9,ahr,foxf2,gli3,bmp6,m…	1.5882
297	0.0260999	GO:0032270	positive regulation of cellular protein metabolic process	fgfr3,ctbp1,npy5r,sfrp2,egf,snca,rest,dgkq,musk,klf4,cdc14b,gadd45g,lif,cartpt,mef2c,plk2,isl1,ghr,prkaa1,prlr,robo1,taok1,rspo1,kiss1,dstyk,mapkapk2,rap1a,notch1,auts2,ndfip2,htr2a,fgf9,pdgfd,wnt11,ccnd2,csf1r,sh3rf2,cntn1,reln,sema3a,clpx,dvl2,pacsin3,cd44,spon1,aktip,il34,cyr61,lpar3,adcy7,trabd2b,arl6ip5,tgfb2,prox1,nenf,bmp2,bcl2l11,oprm1,map3k7,gfral,bmp5,bcl6,larp4b,ptk2b,prkag1,nrp1,map3k…	1.58336
298	0.026103	GO:0072163	mesonephric epithelium development	slit2,spry1,foxd1,gdnf,smad2,wnt11,sall1,bmp2,sim1,osr1,bcl2,gli3,eya1,calb1,fgfr2,fmn1,vegfa	1.58331
299	0.026103	GO:0072164	mesonephric tubule development	slit2,spry1,foxd1,gdnf,smad2,wnt11,sall1,bmp2,sim1,osr1,bcl2,gli3,eya1,calb1,fgfr2,fmn1,vegfa	1.58331
300	0.0272	GO:0048863	stem cell differentiation	ednra,rest,lif,fbxl17,sema6a,mef2c,isl1,gdnf,runx1,notch1,tbx2,msi2,msx2,sema3a,sema3f,psmd6,tgfb2,osr1,nrp1,fzd1,twist1,fgfr2,zeb2,hoxb4,myocd,gata4,psmd5,sox5,xrcc5,sox6,sox18	1.56543
301	0.0280444	GO:0003184	pulmonary valve morphogenesis	slit2,gja5,robo1,notch1,tgfb2,hey2,hey1	1.55215
302	0.0283931	GO:0048514	blood vessel morphogenesis	slit2,hpgd,sfrp2,ednra,egf,anxa3,klf4,myo18b,xbp1,sema6a,plk2,isl1,tcf4,gja5,runx1,robo1,rap1a,notch1,tbx2,col4a1,fgf9,wnt11,egr3,ephb4,adm,cyr61,cdh5,cdh13,foxf1,s1pr1,adamts9,tgfb2,prox1,hey2,apob,ptk2b,nrp1,twist1,hdac9,cdh2,eya1,hey1,angpt1,has2,fgfr2,eng,prkd1,thbs1,itgax,stat1,cxcr4,itgb3,myocd,gata4,egfl7,pofut1,wnt7b,vegfa,adam15,sox18,emilin1,wnt5a	1.54679
303	0.0284615	GO:0051588	regulation of neurotransmitter transport	snca,mef2c,htr1a,gdnf,cplx4,rap1a,rims3,htr2a,drd1,ppfia2,arl6ip5,rims1,nlgn1,nrn1,stx1b,hrh3,itgb3,slc6a1,syt4,dnm1l,cspg5	1.54574
304	0.0300291	GO:0040011	locomotion	gfra4,atoh8,ldb2,slit2,fat1,sfrp2,egf,tacr3,ppp3ca,unc5c,snca,anxa3,klf4,slc8b1,apc,xbp1,sema6a,foxd1,mef2c,plk2,isl1,gdnf,adamts12,dscam,adamts1,epha6,robo1,plxna2,sdc3,ptpru,srgap2,slc16a1,anks1a,notch1,auts2,gpc6,fgf9,pdgfd,wnt11,csf1r,cxcl14,sh3rf2,drd1,msx2,reln,sema3a,podxl,duox1,znf703,itga11,egr3,pld2,ephb4,cd44,pax6,siah1,cyr61,osgin1,cdh13,foxf1,slc7a5,tspan1,s1pr1,sema3f,fam19a4,adamts…	1.52246
305	0.0304618	GO:0048732	gland development	egf,xbp1,otp,isl1,prlr,smad2,robo1,nr0b1,rap1a,notch1,tbx2,vdr,wnt11,csf1r,pitx1,msx2,sema3a,znf703,pax6,rpgrip1l,sall1,foxf1,tgfb2,prox1,bmp2,bcl2l11,cga,nrp1,bcl2,gli3,fgfr2,ar,srsf5,crip1,tgm2,mafb,rxra,eaf2,nr5a1,wnt7b,thra,gli2,vegfa,ccdc40,wnt5a	1.51624
306	0.0342739	GO:2000147	positive regulation of cell motility	atoh8,egf,tacr3,ppp3ca,anxa3,apc,xbp1,sema6a,plk2,adamts1,notch1,fgf9,pdgfd,wnt11,csf1r,cxcl14,sh3rf2,drd1,reln,sema3a,podxl,duox1,znf703,cyr61,cdh13,foxf1,s1pr1,sema3f,tgfb2,prox1,bmp2,cga,ptk2b,nrp1,twist1,hdac9,bcl2,capn7,lyn,angpt1,has2,cxcl12,cd99l2,prkd1,thbs1,itgax,hdac4,tnfaip6,cxcr4,itgb3,snai1,vegfa,wnt5a	1.46504
307	0.0344605	GO:0000165	MAPK cascade	gfra4,fgfr3,npy5r,sfrp2,spry1,egf,dusp4,klf4,gadd45g,lif,sema6a,cartpt,mef2c,ghr,prkaa1,gdnf,robo1,taok1,kiss1,dstyk,mapkapk2,rap1a,mapk13,notch1,htr2a,fgf9,pdgfd,csf1r,sh3rf2,sema3a,dvl2,cd44,cyr61,lpar3,qars,arl6ip5,psmd6,tgfb2,nenf,bmp2,oprm1,map3k7,gfral,bmp5,ptk2b,zmynd11,nrp1,map3k8,znf622,bmp6,cdh2,lyn,gdf6,angpt1,gfra1,cd4,fas,fgfr2,mapk8,ar,fgf13,thbs1,c1qtnf1,zeb2,cxcr4,phb,dok5,ube2v1,…	1.46268
308	0.0346603	GO:0010717	regulation of epithelial to mesenchymal transition	sfrp2,isl1,smad2,notch1,znf703,tgfb2,bmp2,bmp5,wwtr1,twist1,ldlrad4,eng,pofut2,snai1,olfm1,tcf7l2	1.46017
309	0.0368006	GO:0098609	cell-cell adhesion	fat1,dchs2,pcdh18,pcdh10,ptprs,anxa3,klf4,ptprd,xbp1,igsf11,dscam,runx1,ncam2,robo1,ptpru,vmp1,slitrk1,pcdh9,pcdh17,pcdh8,tenm4,podxl,znf703,egr3,lrrc4c,cd44,cyr61,cdh11,cdh5,cdh13,foxf1,negr1,tgfb2,cd93,bmp2,bves,bmp5,nlgn1,bcl6,map3k8,bcl2,cdh10,cdh12,cdh18,myo10,gli3,cdh2,lyn,has2,fam49b,cd4,cxcl12,fxyd5,robo3,l1cam,cd99l2,tnfaip8l2,igsf9,itgax,c1qtnf1,socs1,dpp4,igfbp2,itgb3,pkhd1,wnt7b,nfkbi…	1.43415
310	0.0390276	GO:0043549	regulation of kinase activity	fgfr3,ldb2,sfrp2,spry1,egf,snca,dusp4,dgkq,klf4,gadd45g,apc,cartpt,mef2c,ghr,prkaa1,prlr,robo1,taok1,dstyk,mapkapk2,rap1a,htr2a,ccna1,pdgfd,wnt11,ccnd2,csf1r,reln,dvl2,ipo7,cd44,cyr61,lpar3,dus2,adcy7,qars,tgfb2,prox1,bmp2,map3k7,gfral,mcph1,wwtr1,ptk2b,prkag1,map3k8,znf622,lyn,angpt1,rplp1,cd4,tsc1,fgf13,ccnk,prkd1,chp1,thbs1,socs1,zeb2,cxcr4,srcin1,itgb3,ube2v1,myocd,pik3r5,wee2,xrcc5,wnt7b,itp…	1.40863
311	0.0390917	GO:0060415	muscle tissue morphogenesis	myh6,isl1,tnnt2,notch1,s1pr1,tgfb2,prox1,bmp2,hey2,fzd1,fgfr2,eng,actc1,rxra,wnt5a	1.40792
312	0.0406748	GO:0003272	endocardial cushion formation	robo1,notch1,msx2,tgfb2,hey2,bmp5,eng,snai1	1.39067
313	0.0429965	GO:0003190	atrioventricular valve formation	notch1,hey2,hey1,gata4,olfm1	1.36657
314	0.0440761	GO:0016079	synaptic vesicle exocytosis	snca,stx2,cplx4,rap1a,rims3,htr2a,drd1,ppfia2,pclo,cadps,rims1,nlgn1,nrn1,stx1b,syt4,dnm1l,cspg5,erc2,stx3	1.3558
315	0.0440761	GO:0002062	chondrocyte differentiation	fgfr3,sfrp2,mef2c,adamts12,mex3c,col2a1,fgf9,msx2,bmp2,osr1,wnt9a,pth1r,gli3,bmp6,gdf6,sox5,gli2,sox6,col11a2	1.3558
316	0.0440837	GO:1902533	positive regulation of intracellular signal transduction	fgfr3,npy5r,nr3c2,egf,alpk1,gadd45g,lif,cartpt,mef2c,plk2,ghr,prkaa1,robo1,taok1,kiss1,dstyk,mapkapk2,rap1a,notch1,auts2,ndfip2,htr2a,fgf9,gucy1a2,pdgfd,wnt11,csf1r,sh3rf2,reln,sema3a,dvl2,trim44,cd44,siah1,lpar3,cdh13,ror1,arl6ip5,tgfb2,nenf,bmp2,bcl2l11,oprm1,map3k7,gfral,nlgn1,ptk2b,nrp1,map3k8,bcl2,znf622,cdh2,lyn,gdf6,angpt1,cd4,fgfr2,eng,ar,lpar4,prkd1,thbs1,c1qtnf1,zeb2,cxcr4,rpl23,phb,dok…	1.35572
317	0.0444607	GO:0021885	forebrain cell migration	slit2,robo1,srgap2,drd1,reln,sema3a,fezf2,nrp1,gli3,cxcl12,fgf13,cxcr4,emx2	1.35202
318	0.0444607	GO:0048645	animal organ formation	spry1,mef2c,isl1,gdnf,robo1,notch1,bmp2,gli3,eya1,fgfr2,ar,gli2,wnt5a	1.35202
319	0.0448293	GO:0001823	mesonephros development	slit2,spry1,foxd1,gdnf,smad2,wnt11,sall1,bmp2,sim1,osr1,bcl2,gli3,eya1,calb1,fgfr2,fmn1,vegfa	1.34844
320	0.0472401	GO:0009968	negative regulation of signal transduction	slit2,sfrp2,spry1,egf,snca,ptprs,dusp4,klf4,lif,apc,xbp1,fbn2,sema6a,isl1,prkaa1,gdnf,adamts12,smad2,skor2,robo1,nr0b1,ptpru,notch1,rph3al,col2a1,amer2,fgf9,tsku,wnt11,sh3rf2,cnot2,dvl2,adm,cd44,sigirr,siah1,rpgrip1l,trabd2b,qars,psmd6,tgfb2,bmp2,snx5,hey2,oprm1,foxo3,phip,gfral,bmp5,bcl6,wwtr1,insig1,zmynd11,nrp1,fzd1,twist1,bcl2,rnf152,gli3,rbms3,ldlrad4,cdh2,lyn,eya1,hey1,fas,cxcl12,ppif,tmem8…	1.32569
321	0.0479813	GO:0010463	mesenchymal cell proliferation	dchs2,fgf9,wnt11,foxf1,bmp2,osr1,zeb1,fgfr2,stat1,vegfa,wnt5a	1.31893
322	0.0491679	GO:0001558	regulation of cell growth	slit2,cdkn2aip,sfrp2,kiaa1109,ptprs,wdr36,sema6a,dscam,st7l,wnt11,sema3a,lpar3,osgin1,pappa2,sema3f,cpne5,tgfb2,rims1,bcl6,ptk2b,nrp1,adnp2,bcl2,kazald1,zfyve27,cxcl12,ei24,l1cam,fgf13,slc44a4,crabp2,cxcr4,phb,myocd,syt4,olfm1,eaf2,eif4g2,igfbp4,vegfa,adam15,wnt5a	1.30832

## Sheet: Supp Table 1d
paxvALL gene ontology results
	p_value	term_id	term_name	intersection	logp
1	5.84255e-22	GO:0048519	negative regulation of biological process	avp,paip2b,cyp26b1,rab11fip5,chmp3,eif2ak3,tnip2,mxd4,letm1,fgfr3,uvssa,ctbp1,fgfrl1,htt,fgfbp1,lyar,msx1,wfs1,htra3,ppargc1a,klf3,pds5a,apbb2,kdr,cnot7,hmgb2,rbm46,hhip,smarca5,spry1,nudt6,camk2d,aimp1,ube2d3,eif4e,grid2,snca,g3bp2,pias4,hmg20b,lpl,mex3d,ptbp1,angptl4,oaz1,lsm4,jund,ell,ncbp1,ptbp3,cherp,klf2,hopx,gatad2a,tle2,sh3gl2,tmem38b,klf4,ift74,ttc39b,glis3,dmrt1,klf9,abhd17b,gnaq,tle4,t…	21.2334
2	8.89413e-22	GO:0010604	positive regulation of macromolecule metabolic process	avp,cyp26b1,eif2ak3,tnip2,fgfr3,nkx1-1,ctbp1,fbxl5,msx1,wfs1,ppargc1a,rell1,slc30a9,kdr,cnot7,acsl1,hmgb2,rbm46,smarca5,bbs7,pitx2,tet2,snca,pias4,mex3d,ptbp1,rfx2,oaz1,jund,ell,ncbp1,cep290,polr1e,klf2,klf4,ift74,glis3,dmrt1,tle1,syk,nfil3,chd8,znf219,tmem119,tbx3,crkl,mapk1,chfr,ran,fzd10,ncor2,erp29,tesc,rfc5,xbp1,jmy,ssbp2,ccnh,arrdc3,nr2f1,rnf180,plk2,dhx29,paip1,znf131,prlr,nedd4l,onecut2,c…	21.0509
3	1.4176e-21	GO:0031325	positive regulation of cellular metabolic process	avp,eif2ak3,tnip2,fgfr3,nkx1-1,ctbp1,htt,fbxl5,msx1,wfs1,ppargc1a,rell1,slc30a9,kdr,cnot7,acsl1,hmgb2,smarca5,bbs7,pitx2,tet2,snca,pias4,mex3d,ptbp1,rfx2,jund,ell,ncbp1,cep290,klf2,klf4,ift74,glis3,dmrt1,syk,nfil3,sptlc1,chd8,znf219,tmem119,tbx3,crkl,mapk1,chfr,ulk1,ran,fzd10,scarb1,erp29,tesc,rfc5,xbp1,jmy,ssbp2,ccnh,arrdc3,nr2f1,rnf180,plk2,dhx29,nnt,paip1,znf131,prlr,onecut2,ctif,smad2,celf4,p…	20.8484
4	1.48265e-21	GO:0051173	positive regulation of nitrogen compound metabolic process	avp,eif2ak3,tnip2,fgfr3,nkx1-1,ctbp1,fbxl5,msx1,wfs1,ppargc1a,rell1,slc30a9,kdr,cnot7,acsl1,hmgb2,smarca5,bbs7,pitx2,tet2,snca,pias4,mex3d,ptbp1,rfx2,oaz1,jund,ell,ncbp1,cep290,klf2,klf4,ift74,glis3,dmrt1,syk,nfil3,chd8,znf219,tmem119,tbx3,crkl,mapk1,chfr,ran,fzd10,erp29,tesc,rfc5,xbp1,jmy,ssbp2,ccnh,arrdc3,nr2f1,rnf180,plk2,dhx29,paip1,znf131,prlr,nedd4l,onecut2,ctif,smad2,celf4,prdm15,ets2,runx…	20.829
5	3.9709e-21	GO:0009893	positive regulation of metabolic process	avp,cyp26b1,eif2ak3,tnip2,fgfr3,nkx1-1,ctbp1,htt,fbxl5,msx1,wfs1,ppargc1a,rell1,slc30a9,kdr,cnot7,acsl1,hmgb2,rbm46,smarca5,bbs7,pitx2,tet2,snca,pias4,mex3d,ptbp1,rfx2,oaz1,jund,ell,ncbp1,cep290,polr1e,klf2,klf4,ift74,glis3,dmrt1,rfk,tle1,syk,nfil3,sptlc1,chd8,znf219,tmem119,tbx3,crkl,mapk1,chfr,ulk1,ran,fzd10,scarb1,ncor2,erp29,cmklr1,tesc,rfc5,xbp1,jmy,ssbp2,ccnh,arrdc3,nr2f1,rnf180,plk2,dhx29,…	20.4011
6	5.1952e-21	GO:0048522	positive regulation of cellular process	avp,cyp26b1,eif2ak3,tnip2,fgfr3,nkx1-1,ctbp1,moap1,htt,fgfbp1,fbxl5,wdr1,stx18,msx1,wfs1,ppargc1a,rell1,apbb2,slc30a9,atp8a1,kdr,exoc1,cep135,cnot7,acsl1,hmgb2,plrg1,smarca5,plk4,bbs7,pitx2,camk2d,synpo2,aimp1,tet2,slc9b2,ube2d3,eif4e,tspan5,grid2,snca,g3bp2,pias4,hmg20b,lpl,mex3d,ptbp1,rfx2,csnk1g2,jund,ell,ncbp1,cep290,cherp,klf2,sh3gl2,klf4,ift74,ptprd,glis3,dmrt1,syk,nfil3,sptlc1,rnf31,prmt5,…	20.2844
7	6.15113e-21	GO:0031323	regulation of cellular metabolic process	avp,paip2b,eif2ak3,tnip2,mxd4,fgfr3,nkx1-1,uvssa,ctbp1,htt,fbxl5,znf518b,lyar,msx1,wfs1,htra3,ppargc1a,rell1,klf3,pds5a,apbb2,slc30a9,kdr,exoc1,cnot7,acsl1,hmgb2,rbm46,smarca5,mfsd8,spry1,bbs7,pitx2,neurog2,camk2d,tet2,cisd2,ube2d3,metap1,eif4e,snca,g3bp2,pias4,hmg20b,mex3d,ptbp1,rfx2,oaz1,mknk2,jund,rab8a,ell,epha5,ncbp1,ptbp3,cep290,klf2,hopx,gatad2a,tle2,aco1,sh3gl2,klf4,ift74,glis3,dmrt1,klf9…	20.211
8	2.73978e-20	GO:0048518	positive regulation of biological process	avp,cyp26b1,chmp3,eif2ak3,tnip2,fgfr3,nkx1-1,ctbp1,moap1,htt,fgfbp1,fbxl5,wdr1,lyar,stx18,msx1,wfs1,ppargc1a,rell1,apbb2,slc30a9,atp8a1,kdr,exoc1,cep135,cnot7,acsl1,hmgb2,rbm46,plrg1,smarca5,plk4,spry1,bbs7,pitx2,neurog2,camk2d,synpo2,aimp1,tet2,slc9b2,ube2d3,eif4e,tspan5,grid2,mmrn1,snca,g3bp2,pias4,hmg20b,lpl,mex3d,ptbp1,angptl4,rfx2,oaz1,csnk1g2,jund,ell,epha5,ncbp1,cep290,polr1e,cherp,klf2,sh…	19.5623
9	4.01165e-20	GO:0019222	regulation of metabolic process	avp,paip2b,cyp26b1,eif2ak3,tnip2,mxd4,fgfr3,nkx1-1,uvssa,ctbp1,htt,fbxl5,znf518b,lyar,msx1,wfs1,htra3,ppargc1a,rell1,klf3,pds5a,apbb2,slc30a9,kdr,exoc1,cnot7,acsl1,hmgb2,rbm46,smarca5,mfsd8,spry1,bbs7,pitx2,neurog2,camk2d,tet2,cisd2,ube2d3,metap1,eif4e,snca,g3bp2,pias4,hmg20b,mex3d,ptbp1,angptl4,rfx2,oaz1,mknk2,lsm4,jund,rab8a,ell,epha5,ncbp1,ptbp3,cep290,polr1e,klf2,hopx,gatad2a,tle2,aco1,sh3gl2…	19.3967
10	5.84024e-20	GO:0010557	positive regulation of macromolecule biosynthetic process	eif2ak3,tnip2,nkx1-1,msx1,ppargc1a,slc30a9,kdr,cnot7,hmgb2,smarca5,pitx2,tet2,rfx2,jund,ell,cep290,klf2,klf4,ift74,glis3,dmrt1,syk,nfil3,chd8,znf219,tbx3,mapk1,ran,tesc,rfc5,xbp1,jmy,ssbp2,ccnh,nr2f1,dhx29,paip1,znf131,onecut2,ctif,smad2,prdm15,ets2,runx1,cct8,app,nrip1,zfx,mnt,rps6ka1,arid1a,grhl3,sfpq,sox13,elf3,cask,kpna6,nfyc,rlf,cct6a,tfdp1,ing1,klf12,tnfsf11,acvr1b,kmt2d,wdr61,ptges3,larp4,…	19.2336
11	3.45743e-19	GO:0048523	negative regulation of cellular process	avp,paip2b,cyp26b1,rab11fip5,eif2ak3,tnip2,mxd4,letm1,uvssa,ctbp1,fgfrl1,htt,fgfbp1,lyar,msx1,wfs1,htra3,ppargc1a,klf3,pds5a,apbb2,kdr,cnot7,hmgb2,rbm46,hhip,smarca5,spry1,nudt6,camk2d,aimp1,ube2d3,eif4e,grid2,snca,pias4,hmg20b,lpl,mex3d,ptbp1,angptl4,jund,ell,ptbp3,cherp,klf2,hopx,gatad2a,tle2,sh3gl2,tmem38b,klf4,ift74,glis3,dmrt1,klf9,gnaq,tle4,tle1,nfil3,prmt5,chd8,znf219,tmem119,tbx3,dcp2,c5o…	18.4612
12	1.37468e-18	GO:0031328	positive regulation of cellular biosynthetic process	avp,eif2ak3,tnip2,nkx1-1,msx1,ppargc1a,slc30a9,cnot7,hmgb2,smarca5,pitx2,tet2,snca,rfx2,jund,ell,cep290,klf2,klf4,ift74,glis3,dmrt1,syk,nfil3,chd8,znf219,tbx3,mapk1,ran,scarb1,tesc,rfc5,xbp1,jmy,ssbp2,ccnh,nr2f1,dhx29,paip1,znf131,onecut2,ctif,smad2,prdm15,ets2,runx1,cct8,app,nrip1,zfx,mnt,rps6ka1,arid1a,grhl3,sfpq,sox13,elf3,cask,kpna6,nfyc,rlf,cct6a,tfdp1,ing1,klf12,tnfsf11,acvr1b,kmt2d,wdr61,p…	17.8618
13	1.6006e-18	GO:0051254	positive regulation of RNA metabolic process	eif2ak3,tnip2,nkx1-1,msx1,ppargc1a,slc30a9,cnot7,hmgb2,smarca5,pitx2,tet2,mex3d,rfx2,jund,ell,ncbp1,cep290,klf2,klf4,ift74,glis3,dmrt1,nfil3,chd8,znf219,tbx3,mapk1,ran,tesc,xbp1,jmy,ssbp2,ccnh,nr2f1,znf131,onecut2,smad2,celf4,prdm15,ets2,runx1,app,nrip1,zfx,mnt,rps6ka1,arid1a,grhl3,sfpq,sox13,elf3,cask,kpna6,nfyc,rlf,tfdp1,ing1,klf12,tnfsf11,acvr1b,kmt2d,wdr61,sp1,smarcd1,foxo1,smad9,rfxap,hmgb1,…	17.7957
14	2.61556e-18	GO:0009891	positive regulation of biosynthetic process	avp,eif2ak3,tnip2,nkx1-1,msx1,ppargc1a,slc30a9,kdr,cnot7,hmgb2,smarca5,pitx2,tet2,snca,rfx2,jund,ell,cep290,klf2,klf4,ift74,glis3,dmrt1,syk,nfil3,chd8,znf219,tbx3,mapk1,ran,scarb1,tesc,rfc5,xbp1,jmy,ssbp2,ccnh,nr2f1,dhx29,paip1,znf131,onecut2,ctif,smad2,prdm15,ets2,runx1,cct8,app,nrip1,zfx,mnt,rps6ka1,arid1a,grhl3,sfpq,sox13,elf3,cask,kpna6,nfyc,rlf,cct6a,tfdp1,ing1,klf12,tnfsf11,acvr1b,kmt2d,wdr…	17.5824
15	4.06543e-18	GO:0051171	regulation of nitrogen compound metabolic process	avp,paip2b,eif2ak3,tnip2,mxd4,fgfr3,nkx1-1,uvssa,ctbp1,htt,fbxl5,znf518b,lyar,msx1,wfs1,htra3,ppargc1a,rell1,klf3,apbb2,slc30a9,kdr,cnot7,acsl1,hmgb2,rbm46,smarca5,spry1,bbs7,pitx2,neurog2,camk2d,tet2,ube2d3,metap1,eif4e,snca,g3bp2,pias4,hmg20b,mex3d,ptbp1,rfx2,oaz1,mknk2,jund,ell,epha5,ncbp1,ptbp3,cep290,klf2,hopx,gatad2a,tle2,aco1,klf4,ift74,glis3,dmrt1,klf9,gnaq,tle4,tle1,znf367,syk,nfil3,rnf3…	17.3909
16	4.87491e-18	GO:1903508	positive regulation of nucleic acid-templated transcription	eif2ak3,tnip2,nkx1-1,msx1,ppargc1a,slc30a9,cnot7,hmgb2,smarca5,pitx2,tet2,rfx2,jund,ell,cep290,klf2,klf4,ift74,glis3,dmrt1,nfil3,chd8,znf219,tbx3,mapk1,ran,tesc,xbp1,jmy,ssbp2,ccnh,nr2f1,znf131,onecut2,smad2,prdm15,ets2,runx1,app,nrip1,zfx,mnt,rps6ka1,arid1a,grhl3,sfpq,sox13,elf3,cask,kpna6,nfyc,rlf,tfdp1,ing1,klf12,tnfsf11,acvr1b,kmt2d,wdr61,sp1,smarcd1,foxo1,smad9,rfxap,hmgb1,cdk8,kdm7a,trim24,…	17.312
17	5.38214e-18	GO:1902680	positive regulation of RNA biosynthetic process	eif2ak3,tnip2,nkx1-1,msx1,ppargc1a,slc30a9,cnot7,hmgb2,smarca5,pitx2,tet2,rfx2,jund,ell,cep290,klf2,klf4,ift74,glis3,dmrt1,nfil3,chd8,znf219,tbx3,mapk1,ran,tesc,xbp1,jmy,ssbp2,ccnh,nr2f1,znf131,onecut2,smad2,prdm15,ets2,runx1,app,nrip1,zfx,mnt,rps6ka1,arid1a,grhl3,sfpq,sox13,elf3,cask,kpna6,nfyc,rlf,tfdp1,ing1,klf12,tnfsf11,acvr1b,kmt2d,wdr61,sp1,smarcd1,foxo1,smad9,rfxap,hmgb1,cdk8,kdm7a,trim24,…	17.269
18	6.63262e-18	GO:0080090	regulation of primary metabolic process	avp,paip2b,eif2ak3,tnip2,mxd4,fgfr3,nkx1-1,uvssa,ctbp1,htt,fbxl5,znf518b,lyar,msx1,wfs1,htra3,ppargc1a,rell1,klf3,apbb2,slc30a9,kdr,cnot7,acsl1,hmgb2,rbm46,smarca5,spry1,bbs7,pitx2,neurog2,camk2d,tet2,ube2d3,metap1,eif4e,snca,g3bp2,pias4,hmg20b,mex3d,ptbp1,angptl4,rfx2,oaz1,mknk2,jund,ell,epha5,ncbp1,ptbp3,cep290,klf2,hopx,gatad2a,tle2,aco1,plin2,klf4,ift74,ttc39b,glis3,dmrt1,klf9,gnaq,tle4,tle1,…	17.1783
19	2.87213e-17	GO:0045893	positive regulation of transcription, DNA-templated	eif2ak3,tnip2,nkx1-1,msx1,ppargc1a,slc30a9,cnot7,hmgb2,smarca5,pitx2,tet2,rfx2,jund,ell,cep290,klf2,klf4,ift74,glis3,dmrt1,nfil3,chd8,znf219,tbx3,mapk1,ran,tesc,xbp1,ssbp2,ccnh,nr2f1,znf131,onecut2,smad2,prdm15,ets2,runx1,app,nrip1,rps6ka1,arid1a,grhl3,sfpq,sox13,elf3,cask,kpna6,nfyc,rlf,tfdp1,ing1,klf12,tnfsf11,acvr1b,kmt2d,wdr61,sp1,smarcd1,foxo1,smad9,rfxap,hmgb1,cdk8,kdm7a,trim24,maml1,pitx1,…	16.5418
20	3.18946e-17	GO:0045935	positive regulation of nucleobase-containing compound metabolic process	eif2ak3,tnip2,nkx1-1,msx1,ppargc1a,slc30a9,cnot7,hmgb2,smarca5,pitx2,tet2,mex3d,rfx2,jund,ell,ncbp1,cep290,klf2,klf4,ift74,glis3,dmrt1,nfil3,chd8,znf219,tbx3,mapk1,ran,tesc,rfc5,xbp1,jmy,ssbp2,ccnh,nr2f1,znf131,onecut2,smad2,celf4,prdm15,ets2,runx1,cct8,app,nrip1,zfx,mnt,rps6ka1,arid1a,grhl3,sfpq,sox13,elf3,cask,kpna6,nfyc,rlf,cct6a,tfdp1,ing1,klf12,tnfsf11,acvr1b,kmt2d,wdr61,ptges3,sp1,smarcd1,g…	16.4963
21	5.3457e-17	GO:0060255	regulation of macromolecule metabolic process	avp,paip2b,cyp26b1,eif2ak3,tnip2,mxd4,fgfr3,nkx1-1,uvssa,ctbp1,htt,fbxl5,znf518b,lyar,msx1,wfs1,htra3,ppargc1a,rell1,klf3,pds5a,apbb2,slc30a9,kdr,cnot7,acsl1,hmgb2,rbm46,smarca5,spry1,bbs7,pitx2,neurog2,camk2d,tet2,ube2d3,metap1,eif4e,snca,g3bp2,pias4,hmg20b,mex3d,ptbp1,rfx2,oaz1,mknk2,lsm4,jund,ell,epha5,ncbp1,ptbp3,cep290,polr1e,klf2,hopx,gatad2a,tle2,aco1,sh3gl2,klf4,ift74,glis3,dmrt1,klf9,gna…	16.272
22	7.58062e-17	GO:0010628	positive regulation of gene expression	avp,cyp26b1,eif2ak3,tnip2,nkx1-1,msx1,ppargc1a,slc30a9,cnot7,hmgb2,rbm46,smarca5,pitx2,tet2,rfx2,jund,ell,ncbp1,cep290,polr1e,klf2,klf4,ift74,glis3,dmrt1,tle1,nfil3,chd8,znf219,tmem119,tbx3,mapk1,ran,ncor2,erp29,tesc,xbp1,ssbp2,ccnh,nr2f1,dhx29,paip1,znf131,onecut2,ctif,smad2,celf4,prdm15,ets2,runx1,app,nrip1,baz1b,timm17a,rps6ka1,arid1a,grhl3,sfpq,sox13,elf3,cask,kpna6,nfyc,rlf,lims1,tfdp1,ing1,…	16.1203
23	1.55699e-16	GO:1901576	organic substance biosynthetic process	avp,paip2b,eif2ak3,tnip2,mxd4,nat8l,slbp,nkx1-1,ctbp1,hs3st1,znf518b,lyar,msx1,wfs1,htra3,ppargc1a,pgm2,klf3,pds5a,apbb2,slc30a9,kdr,cnot7,acsl1,dctd,hmgb2,msmo1,smarca5,bbs7,etnppl,pitx2,neurog2,camk2d,aimp1,tet2,ube2d3,metap1,eif4e,snca,g3bp2,pias4,hmg20b,lpl,mex3d,rfx2,oaz1,mknk2,csnk1g2,jund,isyna1,ell,epha5,ncbp1,ugcg,cep290,polr1e,gne,klf2,hopx,gatad2a,tle2,aco1,tmem38b,klf4,ift74,glis3,dmr…	15.8077
24	2.6933e-16	GO:0045944	positive regulation of transcription by RNA polymerase II	tnip2,nkx1-1,msx1,ppargc1a,slc30a9,cnot7,hmgb2,smarca5,pitx2,tet2,rfx2,jund,ell,klf2,klf4,ift74,glis3,dmrt1,chd8,znf219,xbp1,ssbp2,ccnh,nr2f1,znf131,onecut2,smad2,prdm15,ets2,runx1,app,nrip1,rps6ka1,grhl3,sfpq,sox13,elf3,cask,kpna6,nfyc,rlf,tfdp1,klf12,tnfsf11,acvr1b,kmt2d,wdr61,sp1,foxo1,smad9,hmgb1,cdk8,maml1,pitx1,irf1,ddx41,egr1,e2f7,wasl,nampt,dmtf1,sin3a,rora,arid3b,znf609,crtc3,mef2a,smad6…	15.5697
25	5.47359e-16	GO:0009058	biosynthetic process	avp,paip2b,eif2ak3,tnip2,mxd4,nat8l,slbp,nkx1-1,ctbp1,hs3st1,znf518b,lyar,msx1,wfs1,htra3,ppargc1a,pgm2,klf3,pds5a,apbb2,slc30a9,kdr,cnot7,acsl1,dctd,hmgb2,msmo1,smarca5,bbs7,etnppl,pitx2,neurog2,camk2d,aimp1,tet2,ube2d3,metap1,eif4e,snca,g3bp2,pias4,hmg20b,lpl,mex3d,rfx2,oaz1,mknk2,csnk1g2,jund,isyna1,ell,epha5,ncbp1,ugcg,cep290,polr1e,gne,klf2,hopx,gatad2a,tle2,aco1,tmem38b,klf4,ift74,glis3,dmr…	15.2617
26	9.61889e-16	GO:0034613	cellular protein localization	rab11fip5,eif2ak3,slbp,moap1,stx18,msx1,exoc1,spcs3,cpe,plrg1,tbc1d9,sec24b,ube2d3,eif4e,tspan5,grid2,timm44,oaz1,rab8a,ncbp1,tomm5,cep290,cplx1,srp72,mau2,ift74,abhd17b,syk,rnf31,rab2b,cabp1,crkl,mapk1,ran,rilpl1,vps37b,clip1,erp29,tesc,hsd17b4,tmed7,tnpo1,zfyve16,amacr,golph3,lman1,nedd4l,baat,rpl17,wrb,dscr3,morc3,cct8,flot2,tax1bp3,vps37d,ywhae,ift22,ift20,rabgef1,timm17a,tbrg1,rpa2,sfpq,epb4…	15.0169
27	1.31547e-15	GO:0070727	cellular macromolecule localization	rab11fip5,eif2ak3,slbp,moap1,stx18,msx1,exoc1,spcs3,cpe,plrg1,tbc1d9,sec24b,ube2d3,eif4e,tspan5,grid2,timm44,mex3d,oaz1,rab8a,ncbp1,tomm5,cep290,cplx1,srp72,mau2,ift74,abhd17b,syk,rnf31,rab2b,cabp1,crkl,mapk1,ran,rilpl1,vps37b,clip1,erp29,tesc,hsd17b4,tmed7,tnpo1,zfyve16,amacr,golph3,lman1,nedd4l,baat,rpl17,wrb,dscr3,morc3,cct8,flot2,tax1bp3,vps37d,ywhae,ift22,ift20,rabgef1,timm17a,tbrg1,rpa2,sfp…	14.8809
28	3.35533e-15	GO:0044237	cellular metabolic process	avp,paip2b,cyp26b1,chmp3,eif2ak3,tnip2,mxd4,nat8l,fgfr3,slbp,nkx1-1,uvssa,ctbp1,htt,fbxl5,hs3st1,znf518b,lyar,msx1,wfs1,man2b2,htra3,dhx15,ppargc1a,pgm2,rell1,klf3,pds5a,apbb2,slc30a9,kdr,exoc1,lonrf1,cnot7,acsl1,dctd,aga,neil3,spcs3,hmgb2,cpe,msmo1,rbm46,plrg1,smarca5,usp38,ndufc1,mfsd8,plk4,spry1,bbs7,etnppl,pitx2,neurog2,camk2d,synpo2,aimp1,tet2,cisd2,ube2d3,adh5,metap1,eif4e,tspan5,snca,herc6…	14.4743
29	4.08286e-15	GO:0033036	macromolecule localization	rab11fip5,chmp3,eif2ak3,slbp,moap1,stx18,msx1,atp8a1,scfd2,exoc1,cep135,acsl1,spcs3,cpe,plrg1,tbc1d9,ankrd50,bbs7,sec24b,slc9b2,ube2d3,eif4e,tspan5,grid2,g3bp2,timm44,lpl,atp8b3,mex3d,oaz1,rab8a,epha5,fras1,ncbp1,ugcg,snx30,tomm5,cep290,cplx1,srp72,mau2,plin2,ift74,ttc39b,abhd17b,syk,rnf31,lrp10,rab2b,dcp2,c5orf30,gltp,cabp1,crkl,mapk1,ulk1,ran,scarb1,rilpl1,vps37b,clip1,erp29,tesc,xbp1,phax,hsd1…	14.389
30	4.1585e-15	GO:0034645	cellular macromolecule biosynthetic process	paip2b,eif2ak3,tnip2,mxd4,slbp,nkx1-1,ctbp1,hs3st1,znf518b,lyar,msx1,wfs1,htra3,ppargc1a,pgm2,klf3,pds5a,apbb2,slc30a9,cnot7,hmgb2,smarca5,bbs7,pitx2,neurog2,camk2d,aimp1,tet2,ube2d3,metap1,eif4e,snca,g3bp2,pias4,hmg20b,mex3d,rfx2,mknk2,jund,ell,epha5,ncbp1,ugcg,cep290,polr1e,klf2,hopx,gatad2a,tle2,aco1,klf4,ift74,glis3,dmrt1,klf9,abhd17b,gcnt1,tle4,tle1,znf367,syk,nfil3,rnf31,prmt5,chd8,znf219,t…	14.3811
31	4.58782e-15	GO:0006996	organelle organization	avp,cyp26b1,chmp3,eif2ak3,letm1,tacc3,uvssa,ctbp1,moap1,htt,wdr1,stx18,msx1,ppargc1a,ncapg,pds5a,kdr,cep135,cnot7,hmgb2,fhdc1,smarca5,ndufc1,mfsd8,plk4,spry1,bbs7,sec24b,camk2d,synpo2,tet2,cisd2,ube2d3,grid2,snca,g3bp2,timm44,hmg20b,atp8b3,rfx2,lsm4,rab8a,epha5,tomm5,cep290,cplx1,mau2,tmem38b,ift74,ptprd,dmrt1,rnf31,prmt5,chd8,smtn,mtmr3,dcp2,man2a1,c5orf30,usp30,limk2,specc1l,mapk1,ulk1,ran,fzd1…	14.3384
32	4.89753e-15	GO:0044249	cellular biosynthetic process	avp,paip2b,eif2ak3,tnip2,mxd4,nat8l,slbp,nkx1-1,ctbp1,hs3st1,znf518b,lyar,msx1,wfs1,htra3,ppargc1a,pgm2,klf3,pds5a,apbb2,slc30a9,cnot7,acsl1,dctd,hmgb2,smarca5,bbs7,etnppl,pitx2,neurog2,camk2d,aimp1,tet2,ube2d3,metap1,eif4e,snca,g3bp2,pias4,hmg20b,lpl,mex3d,rfx2,oaz1,mknk2,csnk1g2,jund,isyna1,ell,epha5,ncbp1,ugcg,cep290,polr1e,klf2,hopx,gatad2a,tle2,aco1,tmem38b,klf4,ift74,glis3,dmrt1,klf9,abhd17…	14.31
33	8.38176e-15	GO:0044260	cellular macromolecule metabolic process	avp,paip2b,eif2ak3,tnip2,mxd4,fgfr3,slbp,nkx1-1,uvssa,ctbp1,htt,fbxl5,hs3st1,znf518b,lyar,msx1,wfs1,man2b2,htra3,ppargc1a,pgm2,rell1,klf3,pds5a,apbb2,slc30a9,kdr,lonrf1,cnot7,acsl1,aga,neil3,spcs3,hmgb2,cpe,rbm46,smarca5,usp38,plk4,spry1,bbs7,pitx2,neurog2,camk2d,aimp1,tet2,ube2d3,adh5,metap1,eif4e,tspan5,snca,herc6,g3bp2,pias4,hmg20b,mex3d,ptbp1,rfx2,mknk2,csnk1g2,lsm4,jund,rab8a,ell,epha5,ncbp1…	14.0767
34	8.7889e-15	GO:0019219	regulation of nucleobase-containing compound metabolic process	eif2ak3,tnip2,mxd4,nkx1-1,ctbp1,znf518b,lyar,msx1,wfs1,htra3,ppargc1a,klf3,apbb2,slc30a9,cnot7,hmgb2,rbm46,smarca5,bbs7,pitx2,neurog2,camk2d,tet2,ube2d3,snca,g3bp2,pias4,hmg20b,mex3d,ptbp1,rfx2,jund,ell,epha5,ncbp1,ptbp3,cep290,klf2,hopx,gatad2a,tle2,klf4,ift74,glis3,dmrt1,klf9,tle4,tle1,znf367,syk,nfil3,rnf31,prmt5,chd8,znf219,tbx3,dcp2,hic2,mapk1,ran,ncor2,cmklr1,tesc,rfc5,suds3,xbp1,lztr1,jmy,…	14.0561
35	9.39707e-15	GO:0071840	cellular component organization or biogenesis	avp,cyp26b1,chmp3,eif2ak3,letm1,tacc3,uvssa,ctbp1,fgfrl1,moap1,htt,wdr1,lyar,stx18,msx1,ppargc1a,ncapg,pds5a,apbb2,atp8a1,kdr,cep135,cnot7,hmgb2,fhdc1,smarca5,ndufc1,mfsd8,plk4,spry1,kiaa1109,bbs7,sec24b,camk2d,synpo2,tet2,cisd2,ube2d3,grid2,snca,g3bp2,timm44,hmg20b,lpl,atp8b3,angptl4,rfx2,lsm4,rab8a,epha5,ncbp1,ugcg,tomm5,cep290,polr1e,cplx1,klf2,hopx,mau2,ncln,tle2,sh3gl2,tmem38b,klf4,ift74,psi…	14.027
36	9.80775e-15	GO:0051253	negative regulation of RNA metabolic process	mxd4,ctbp1,lyar,msx1,wfs1,klf3,cnot7,hmgb2,rbm46,smarca5,ube2d3,snca,pias4,ptbp1,jund,ptbp3,klf2,gatad2a,tle2,klf4,glis3,dmrt1,tle4,tle1,nfil3,prmt5,chd8,znf219,tbx3,hic2,ncor2,suds3,nr2f1,mier3,paip1,znf131,nedd4l,atp8b1,mbd2,smad2,celf4,ets2,runx1,olig2,nrip1,phf12,hic1,mnt,arid1a,id3,sfpq,sox13,elf3,trim33,ppm1d,lims1,klf12,kmt2d,pa2g4,rps26,bcdin3d,foxo1,hmgb1,fgf9,pspc1,eed,crebzf,trim24,pit…	14.0084
37	1.31278e-14	GO:0016043	cellular component organization	avp,cyp26b1,chmp3,eif2ak3,letm1,tacc3,uvssa,ctbp1,fgfrl1,moap1,htt,wdr1,stx18,msx1,ppargc1a,ncapg,pds5a,apbb2,atp8a1,kdr,cep135,cnot7,hmgb2,fhdc1,smarca5,ndufc1,mfsd8,plk4,spry1,kiaa1109,bbs7,sec24b,camk2d,synpo2,tet2,cisd2,ube2d3,grid2,snca,g3bp2,timm44,hmg20b,lpl,atp8b3,angptl4,rfx2,lsm4,rab8a,epha5,ncbp1,ugcg,tomm5,cep290,polr1e,cplx1,klf2,hopx,mau2,ncln,tle2,sh3gl2,tmem38b,klf4,ift74,psip1,pt…	13.8818
38	2.04924e-14	GO:2000112	regulation of cellular macromolecule biosynthetic process	paip2b,eif2ak3,tnip2,mxd4,nkx1-1,ctbp1,znf518b,lyar,msx1,wfs1,htra3,ppargc1a,klf3,pds5a,apbb2,slc30a9,cnot7,hmgb2,smarca5,bbs7,pitx2,neurog2,camk2d,tet2,ube2d3,metap1,eif4e,snca,g3bp2,pias4,hmg20b,mex3d,rfx2,mknk2,jund,ell,epha5,ncbp1,cep290,klf2,hopx,gatad2a,tle2,aco1,klf4,ift74,glis3,dmrt1,klf9,tle4,tle1,znf367,syk,nfil3,rnf31,chd8,znf219,tbx3,dcp2,hic2,mapk1,ran,ncor2,cmklr1,tesc,rfc5,suds3,xb…	13.6884
39	2.26116e-14	GO:0009059	macromolecule biosynthetic process	paip2b,eif2ak3,tnip2,mxd4,slbp,nkx1-1,ctbp1,hs3st1,znf518b,lyar,msx1,wfs1,htra3,ppargc1a,pgm2,klf3,pds5a,apbb2,slc30a9,kdr,cnot7,hmgb2,smarca5,bbs7,pitx2,neurog2,camk2d,aimp1,tet2,ube2d3,metap1,eif4e,snca,g3bp2,pias4,hmg20b,mex3d,rfx2,mknk2,jund,ell,epha5,ncbp1,ugcg,cep290,polr1e,klf2,hopx,gatad2a,tle2,aco1,klf4,ift74,glis3,dmrt1,klf9,abhd17b,gcnt1,tle4,tle1,znf367,syk,nfil3,rnf31,prmt5,chd8,znf2…	13.6457
40	2.79877e-14	GO:0045934	negative regulation of nucleobase-containing compound metabolic process	mxd4,ctbp1,lyar,msx1,wfs1,ppargc1a,klf3,cnot7,hmgb2,rbm46,smarca5,ube2d3,snca,pias4,ptbp1,jund,ptbp3,klf2,gatad2a,tle2,klf4,glis3,dmrt1,tle4,tle1,nfil3,prmt5,chd8,znf219,tbx3,dcp2,hic2,ncor2,suds3,msh3,nr2f1,mier3,paip1,znf131,nedd4l,atp8b1,mbd2,smad2,celf4,ets2,runx1,olig2,nrip1,phf12,hic1,mnt,arid1a,id3,sfpq,sox13,elf3,trim33,ppm1d,lims1,klf12,kmt2d,pa2g4,rps26,bcdin3d,foxo1,hmgb1,fgf9,pspc1,ee…	13.553
41	3.67506e-14	GO:0045892	negative regulation of transcription, DNA-templated	mxd4,ctbp1,lyar,msx1,wfs1,klf3,cnot7,hmgb2,smarca5,ube2d3,snca,pias4,jund,klf2,gatad2a,tle2,klf4,glis3,dmrt1,tle4,tle1,nfil3,chd8,znf219,tbx3,hic2,ncor2,suds3,nr2f1,mier3,znf131,nedd4l,atp8b1,mbd2,smad2,ets2,runx1,olig2,nrip1,phf12,hic1,mnt,arid1a,id3,sfpq,sox13,elf3,trim33,ppm1d,lims1,klf12,kmt2d,pa2g4,foxo1,hmgb1,fgf9,pspc1,eed,crebzf,trim24,pitx1,wwc2,irf1,msx2,egr1,cnot2,e2f7,pawr,suv39h2,chc…	13.4347
42	5.18254e-14	GO:0008104	protein localization	rab11fip5,chmp3,eif2ak3,slbp,moap1,stx18,msx1,scfd2,exoc1,cep135,spcs3,cpe,plrg1,tbc1d9,ankrd50,bbs7,sec24b,slc9b2,ube2d3,eif4e,tspan5,grid2,g3bp2,timm44,lpl,oaz1,rab8a,epha5,fras1,ncbp1,snx30,tomm5,cep290,cplx1,srp72,mau2,ift74,abhd17b,syk,rnf31,rab2b,c5orf30,cabp1,crkl,mapk1,ulk1,ran,rilpl1,vps37b,clip1,erp29,tesc,xbp1,phax,hsd17b4,tmed7,tnpo1,zfyve16,cetn3,snx18,ptger4,c1qtnf3,amacr,golph3,lma…	13.2855
43	5.77045e-14	GO:0051641	cellular localization	rab11fip5,chmp3,eif2ak3,letm1,slbp,moap1,htt,stx18,msx1,scfd2,exoc1,cep135,spcs3,cpe,plrg1,tbc1d9,plk4,ankrd50,spry1,kiaa1109,bbs7,sec24b,camk2d,slc9b2,ube2d3,eif4e,tspan5,grid2,snca,timm44,mex3d,oaz1,rab8a,epha5,ncbp1,tomm5,cep290,cplx1,cherp,srp72,mau2,sh3gl2,tmem38b,ift74,psip1,abhd17b,syk,rnf31,rab2b,smtn,cabp1,crkl,mapk1,ran,rilpl1,vps37b,clip1,erp29,tesc,phax,hsd17b4,sema6a,tmed7,col4a3bp,t…	13.2388
44	7.69922e-14	GO:0009889	regulation of biosynthetic process	avp,paip2b,eif2ak3,tnip2,mxd4,nkx1-1,ctbp1,znf518b,lyar,msx1,wfs1,htra3,ppargc1a,klf3,pds5a,apbb2,slc30a9,kdr,cnot7,hmgb2,smarca5,bbs7,pitx2,neurog2,camk2d,tet2,ube2d3,metap1,eif4e,snca,g3bp2,pias4,hmg20b,mex3d,rfx2,mknk2,jund,ell,epha5,ncbp1,cep290,klf2,hopx,gatad2a,tle2,aco1,klf4,ift74,glis3,dmrt1,klf9,tle4,tle1,znf367,syk,nfil3,rnf31,prmt5,chd8,znf219,tbx3,dcp2,hic2,mapk1,ran,scarb1,ncor2,cmkl…	13.1136
45	9.6847e-14	GO:0000122	negative regulation of transcription by RNA polymerase II	mxd4,ctbp1,lyar,msx1,wfs1,klf3,cnot7,ube2d3,snca,pias4,jund,klf2,gatad2a,klf4,glis3,dmrt1,tle4,nfil3,chd8,znf219,tbx3,hic2,ncor2,suds3,nr2f1,mier3,znf131,nedd4l,mbd2,smad2,ets2,runx1,olig2,nrip1,phf12,hic1,mnt,arid1a,id3,sfpq,trim33,klf12,foxo1,hmgb1,fgf9,eed,wwc2,msx2,egr1,cnot2,e2f7,pawr,suv39h2,chchd3,sin3a,nr2f2,mef2a,fgfr1,dnajb1,dnmt1,smarca4,calr,aurkb,traf6,cry2,ccnd1,wt1,e2f4,esrra,zfhx3…	13.0139
46	9.71458e-14	GO:0051252	regulation of RNA metabolic process	eif2ak3,tnip2,mxd4,nkx1-1,ctbp1,znf518b,lyar,msx1,wfs1,htra3,ppargc1a,klf3,apbb2,slc30a9,cnot7,hmgb2,rbm46,smarca5,bbs7,pitx2,neurog2,camk2d,tet2,ube2d3,snca,g3bp2,pias4,hmg20b,mex3d,ptbp1,rfx2,jund,ell,epha5,ncbp1,ptbp3,cep290,klf2,hopx,gatad2a,tle2,klf4,ift74,glis3,dmrt1,klf9,tle4,tle1,znf367,syk,nfil3,rnf31,prmt5,chd8,znf219,tbx3,dcp2,hic2,mapk1,ran,ncor2,cmklr1,tesc,suds3,xbp1,lztr1,jmy,tnpo1…	13.0126
47	1.11137e-13	GO:0010556	regulation of macromolecule biosynthetic process	paip2b,eif2ak3,tnip2,mxd4,nkx1-1,ctbp1,znf518b,lyar,msx1,wfs1,htra3,ppargc1a,klf3,pds5a,apbb2,slc30a9,kdr,cnot7,hmgb2,smarca5,bbs7,pitx2,neurog2,camk2d,tet2,ube2d3,metap1,eif4e,snca,g3bp2,pias4,hmg20b,mex3d,rfx2,mknk2,jund,ell,epha5,ncbp1,cep290,klf2,hopx,gatad2a,tle2,aco1,klf4,ift74,glis3,dmrt1,klf9,tle4,tle1,znf367,syk,nfil3,rnf31,prmt5,chd8,znf219,tbx3,dcp2,hic2,mapk1,ran,ncor2,cmklr1,tesc,rfc…	12.9541
48	3.71614e-13	GO:1903507	negative regulation of nucleic acid-templated transcription	mxd4,ctbp1,lyar,msx1,wfs1,klf3,cnot7,hmgb2,smarca5,ube2d3,snca,pias4,jund,klf2,gatad2a,tle2,klf4,glis3,dmrt1,tle4,tle1,nfil3,prmt5,chd8,znf219,tbx3,hic2,ncor2,suds3,nr2f1,mier3,znf131,nedd4l,atp8b1,mbd2,smad2,ets2,runx1,olig2,nrip1,phf12,hic1,mnt,arid1a,id3,sfpq,sox13,elf3,trim33,ppm1d,lims1,klf12,kmt2d,pa2g4,foxo1,hmgb1,fgf9,pspc1,eed,crebzf,trim24,pitx1,wwc2,irf1,msx2,egr1,cnot2,e2f7,pawr,suv39…	12.4299
49	4.50476e-13	GO:1902679	negative regulation of RNA biosynthetic process	mxd4,ctbp1,lyar,msx1,wfs1,klf3,cnot7,hmgb2,smarca5,ube2d3,snca,pias4,jund,klf2,gatad2a,tle2,klf4,glis3,dmrt1,tle4,tle1,nfil3,prmt5,chd8,znf219,tbx3,hic2,ncor2,suds3,nr2f1,mier3,znf131,nedd4l,atp8b1,mbd2,smad2,ets2,runx1,olig2,nrip1,phf12,hic1,mnt,arid1a,id3,sfpq,sox13,elf3,trim33,ppm1d,lims1,klf12,kmt2d,pa2g4,foxo1,hmgb1,fgf9,pspc1,eed,crebzf,trim24,pitx1,wwc2,irf1,msx2,egr1,cnot2,e2f7,pawr,suv39…	12.3463
50	5.4608e-13	GO:0071310	cellular response to organic substance	cyp26b1,rab11fip5,eif2ak3,tnip2,fgfr3,uvssa,fgfrl1,fgfbp1,msx1,wfs1,htra3,ppargc1a,klf3,kdr,cnot7,acsl1,hmgb2,hhip,smarca5,pgrmc2,spry1,camk2d,slc9b2,ube2d3,eif4e,snca,pias4,lpl,ptbp1,rfx2,jund,rab8a,epha5,ncbp1,ugcg,klf2,sh3gl2,tmem38b,klf4,klf9,gna14,gnaq,tle4,syk,nfil3,rnf31,pck2,prmt5,crkl,mapk1,ran,fzd10,scarb1,ncor2,sh2b3,cmklr1,tesc,xbp1,slc12a2,lmnb1,sema6a,ocln,zfyve16,nr2f1,ptger4,prlr,…	12.2627
51	9.92195e-13	GO:0031326	regulation of cellular biosynthetic process	avp,paip2b,eif2ak3,tnip2,mxd4,nkx1-1,ctbp1,znf518b,lyar,msx1,wfs1,htra3,ppargc1a,klf3,pds5a,apbb2,slc30a9,cnot7,hmgb2,smarca5,bbs7,pitx2,neurog2,camk2d,tet2,ube2d3,metap1,eif4e,snca,g3bp2,pias4,hmg20b,mex3d,rfx2,mknk2,jund,ell,epha5,ncbp1,cep290,klf2,hopx,gatad2a,tle2,aco1,klf4,ift74,glis3,dmrt1,klf9,tle4,tle1,znf367,syk,nfil3,rnf31,prmt5,chd8,znf219,tbx3,dcp2,hic2,mapk1,ran,scarb1,ncor2,cmklr1,t…	12.0034
52	1.24556e-12	GO:0006807	nitrogen compound metabolic process	avp,paip2b,eif2ak3,tnip2,mxd4,nat8l,fgfr3,slbp,nkx1-1,uvssa,ctbp1,hgfac,htt,fbxl5,hs3st1,znf518b,lyar,msx1,wfs1,man2b2,htra3,dhx15,ppargc1a,rell1,klf3,pds5a,apbb2,slc30a9,kdr,lonrf1,cnot7,acsl1,dctd,aga,neil3,spcs3,hmgb2,cpe,rbm46,plrg1,smarca5,usp38,plk4,spry1,bbs7,pitx2,neurog2,camk2d,synpo2,aimp1,tet2,ube2d3,adh5,metap1,eif4e,tspan5,snca,herc6,abcg2,g3bp2,pias4,hmg20b,mex3d,ptbp1,rfx2,oaz1,mkn…	11.9046
53	1.34974e-12	GO:0044271	cellular nitrogen compound biosynthetic process	paip2b,eif2ak3,tnip2,mxd4,slbp,nkx1-1,ctbp1,znf518b,lyar,msx1,wfs1,htra3,ppargc1a,klf3,apbb2,slc30a9,cnot7,acsl1,dctd,hmgb2,smarca5,bbs7,pitx2,neurog2,camk2d,aimp1,tet2,ube2d3,metap1,eif4e,snca,g3bp2,pias4,hmg20b,mex3d,rfx2,oaz1,mknk2,jund,ell,epha5,ncbp1,ugcg,cep290,polr1e,klf2,hopx,gatad2a,tle2,aco1,klf4,ift74,glis3,dmrt1,klf9,rfk,psat1,tle4,tle1,znf367,syk,nfil3,sptlc1,rnf31,prmt5,chd8,znf219,…	11.8698
54	2.04037e-12	GO:0009892	negative regulation of metabolic process	avp,paip2b,eif2ak3,mxd4,uvssa,ctbp1,lyar,msx1,wfs1,ppargc1a,klf3,pds5a,kdr,cnot7,hmgb2,rbm46,smarca5,spry1,ube2d3,eif4e,snca,pias4,hmg20b,mex3d,ptbp1,lsm4,jund,ell,ncbp1,ptbp3,klf2,gatad2a,tle2,klf4,glis3,dmrt1,gnaq,tle4,tle1,nfil3,prmt5,chd8,znf219,tbx3,dcp2,usp30,crkl,hic2,ran,ncor2,sh2b3,erp29,tesc,pebp1,suds3,tnfaip8,sema6a,enc1,tnpo1,msh3,arrdc3,nr2f1,ttc37,cast,lnpep,mier3,nnt,paip1,znf131,…	11.6903
55	2.39218e-12	GO:0006355	regulation of transcription, DNA-templated	eif2ak3,tnip2,mxd4,nkx1-1,ctbp1,znf518b,lyar,msx1,wfs1,htra3,ppargc1a,klf3,apbb2,slc30a9,cnot7,hmgb2,smarca5,bbs7,pitx2,neurog2,camk2d,tet2,ube2d3,snca,g3bp2,pias4,hmg20b,rfx2,jund,ell,epha5,cep290,klf2,hopx,gatad2a,tle2,klf4,ift74,glis3,dmrt1,klf9,tle4,tle1,znf367,syk,nfil3,rnf31,chd8,znf219,tbx3,hic2,mapk1,ran,ncor2,cmklr1,tesc,suds3,xbp1,lztr1,jmy,zfyve16,ssbp2,ccnh,nr2f1,chd1,mier3,znf131,ned…	11.6212
56	2.49453e-12	GO:0007049	cell cycle	cyp26b1,chmp3,tacc3,slbp,ctbp1,htt,msx1,ncapg,pds5a,apbb2,cep135,cnot7,plrg1,plk4,spry1,nudt6,tet2,eif4e,hmg20b,jund,cep290,mau2,klf4,dmrt1,prmt5,tbx3,specc1l,mapk1,chfr,ran,clip1,rfc5,jmy,msh3,ccnh,cetn3,plk2,snx18,rxfp3,mapk4,ska1,haus1,donson,mis18a,app,chmp2b,btg3,taok1,ywhae,mnt,pdik1l,tbrg1,rps6ka1,id3,rpa2,sfpq,epb41,lamtor5,rhoc,rbbp4,ppm1d,rad51d,mis12,c2orf40,sept10,tfdp1,cul4a,ing1,ipo…	11.603
57	2.84286e-12	GO:0023051	regulation of signaling	avp,cyp26b1,rab11fip5,eif2ak3,tnip2,fgfr3,uvssa,moap1,htt,fgfbp1,msx1,wfs1,htra3,ppargc1a,rell1,kdr,cnot7,hmgb2,hhip,spry1,camk2d,aimp1,arhgef38,slc9b2,metap1,eif4e,tspan5,grid2,snca,g3bp2,pias4,gng7,ptbp1,csnk1g2,rab8a,epha5,ugcg,cplx1,myo9b,cherp,ncln,tle2,sh3gl2,klf4,dmrt1,gnaq,tle4,tle1,syk,rnf31,prmt5,chd8,git2,crkl,mapk1,fzd10,ncor2,rhof,sh2b3,erp29,cmklr1,rfc5,pebp1,xbp1,lztr1,sema6a,jmy,a…	11.5462
58	3.04699e-12	GO:0009966	regulation of signal transduction	avp,cyp26b1,eif2ak3,tnip2,fgfr3,uvssa,moap1,htt,fgfbp1,msx1,wfs1,htra3,ppargc1a,rell1,kdr,cnot7,hmgb2,hhip,spry1,camk2d,arhgef38,metap1,tspan5,snca,g3bp2,pias4,gng7,ptbp1,csnk1g2,ugcg,myo9b,cherp,ncln,tle2,sh3gl2,klf4,dmrt1,gnaq,tle4,tle1,syk,rnf31,prmt5,chd8,git2,crkl,mapk1,fzd10,ncor2,rhof,sh2b3,erp29,cmklr1,rfc5,pebp1,xbp1,lztr1,sema6a,jmy,arrdc3,depdc1b,plk2,prlr,c1qtnf3,adamts12,golph3,onecu…	11.5161
59	3.09342e-12	GO:0090304	nucleic acid metabolic process	eif2ak3,tnip2,mxd4,slbp,nkx1-1,uvssa,ctbp1,znf518b,lyar,msx1,wfs1,htra3,dhx15,ppargc1a,klf3,pds5a,apbb2,slc30a9,cnot7,neil3,hmgb2,rbm46,plrg1,smarca5,bbs7,pitx2,neurog2,camk2d,aimp1,tet2,ube2d3,snca,g3bp2,pias4,hmg20b,mex3d,ptbp1,rfx2,lsm4,jund,ell,epha5,ncbp1,ptbp3,cep290,polr1e,cherp,klf2,hopx,gatad2a,tle2,klf4,ift74,psip1,glis3,dmrt1,klf9,tle4,tle1,znf367,syk,nfil3,rnf31,prmt5,chd8,znf219,tbx3…	11.5096
60	3.10247e-12	GO:1901362	organic cyclic compound biosynthetic process	eif2ak3,tnip2,mxd4,slbp,nkx1-1,ctbp1,znf518b,lyar,msx1,wfs1,htra3,ppargc1a,klf3,apbb2,slc30a9,cnot7,acsl1,dctd,hmgb2,msmo1,smarca5,bbs7,pitx2,neurog2,camk2d,tet2,ube2d3,snca,g3bp2,pias4,hmg20b,rfx2,jund,ell,epha5,ncbp1,cep290,polr1e,klf2,hopx,gatad2a,tle2,klf4,ift74,glis3,dmrt1,klf9,rfk,psat1,tle4,tle1,znf367,syk,nfil3,rnf31,prmt5,chd8,znf219,tbx3,dcp2,mmab,slc25a1,hic2,mapk1,ran,scarb1,ncor2,cmk…	11.5083
61	3.86565e-12	GO:2000113	negative regulation of cellular macromolecule biosynthetic process	paip2b,eif2ak3,mxd4,ctbp1,lyar,msx1,wfs1,klf3,pds5a,cnot7,hmgb2,smarca5,ube2d3,eif4e,snca,pias4,mex3d,jund,klf2,gatad2a,tle2,klf4,glis3,dmrt1,tle4,tle1,nfil3,chd8,znf219,tbx3,dcp2,hic2,ncor2,suds3,enc1,msh3,nr2f1,mier3,znf131,nedd4l,atp8b1,mbd2,smad2,celf4,bace2,ets2,runx1,donson,olig2,nrip1,phf12,hic1,mnt,arid1a,id3,sfpq,sox13,elf3,trim33,ppm1d,lims1,klf12,kmt2d,pa2g4,foxo1,hmgb1,fgf9,pspc1,eed,…	11.4128
62	4.0882e-12	GO:0009890	negative regulation of biosynthetic process	paip2b,eif2ak3,mxd4,ctbp1,lyar,msx1,wfs1,klf3,pds5a,cnot7,hmgb2,smarca5,ube2d3,eif4e,snca,pias4,mex3d,jund,klf2,gatad2a,tle2,klf4,glis3,dmrt1,tle4,tle1,nfil3,prmt5,chd8,znf219,tbx3,dcp2,hic2,ncor2,suds3,enc1,msh3,nr2f1,mier3,znf131,c1qtnf3,nedd4l,atp8b1,mbd2,smad2,celf4,bace2,ets2,runx1,donson,olig2,sod1,nrip1,phf12,hic1,ctns,mnt,arid1a,id3,sfpq,sox13,elf3,trim33,rap1a,ppm1d,lims1,klf12,kmt2d,pa2…	11.3885
63	4.20744e-12	GO:0010646	regulation of cell communication	avp,cyp26b1,rab11fip5,eif2ak3,tnip2,fgfr3,uvssa,moap1,htt,fgfbp1,msx1,wfs1,htra3,ppargc1a,rell1,kdr,cnot7,hmgb2,hhip,spry1,camk2d,aimp1,arhgef38,slc9b2,metap1,eif4e,tspan5,grid2,snca,g3bp2,pias4,gng7,ptbp1,csnk1g2,rab8a,epha5,ugcg,cplx1,myo9b,cherp,ncln,tle2,sh3gl2,klf4,dmrt1,gnaq,tle4,tle1,syk,rnf31,prmt5,chd8,git2,crkl,mapk1,fzd10,ncor2,rhof,sh2b3,erp29,cmklr1,rfc5,pebp1,xbp1,lztr1,sema6a,jmy,a…	11.376
64	6.30093e-12	GO:0034641	cellular nitrogen compound metabolic process	paip2b,eif2ak3,tnip2,mxd4,slbp,nkx1-1,uvssa,ctbp1,znf518b,lyar,msx1,wfs1,htra3,dhx15,ppargc1a,klf3,pds5a,apbb2,slc30a9,cnot7,acsl1,dctd,neil3,spcs3,hmgb2,cpe,rbm46,plrg1,smarca5,bbs7,pitx2,neurog2,camk2d,aimp1,tet2,ube2d3,metap1,eif4e,snca,abcg2,g3bp2,pias4,hmg20b,mex3d,ptbp1,rfx2,oaz1,mknk2,lsm4,jund,ell,epha5,ncbp1,ugcg,ptbp3,cep290,polr1e,gne,cherp,klf2,hopx,gatad2a,tle2,aco1,klf4,ift74,psip1,…	11.2006
65	6.93749e-12	GO:1903506	regulation of nucleic acid-templated transcription	eif2ak3,tnip2,mxd4,nkx1-1,ctbp1,znf518b,lyar,msx1,wfs1,htra3,ppargc1a,klf3,apbb2,slc30a9,cnot7,hmgb2,smarca5,bbs7,pitx2,neurog2,camk2d,tet2,ube2d3,snca,g3bp2,pias4,hmg20b,rfx2,jund,ell,epha5,cep290,klf2,hopx,gatad2a,tle2,klf4,ift74,glis3,dmrt1,klf9,tle4,tle1,znf367,syk,nfil3,rnf31,prmt5,chd8,znf219,tbx3,hic2,mapk1,ran,ncor2,cmklr1,tesc,suds3,xbp1,lztr1,jmy,zfyve16,ssbp2,ccnh,nr2f1,chd1,mier3,znf1…	11.1588
66	8.57025e-12	GO:0044238	primary metabolic process	avp,paip2b,cyp26b1,eif2ak3,tnip2,mxd4,nat8l,fgfr3,slbp,nkx1-1,uvssa,ctbp1,hgfac,htt,fbxl5,hs3st1,znf518b,lyar,msx1,wfs1,man2b2,htra3,dhx15,ppargc1a,gba3,pgm2,rell1,klf3,pds5a,apbb2,slc30a9,kdr,lonrf1,cnot7,acsl1,dctd,aga,neil3,spcs3,hmgb2,cpe,msmo1,rbm46,plrg1,smarca5,usp38,plk4,spry1,bbs7,etnppl,pitx2,neurog2,camk2d,synpo2,aimp1,tet2,ube2d3,adh5,metap1,eif4e,tspan5,snca,herc6,g3bp2,pias4,hmg20b,…	11.067
67	8.91512e-12	GO:0006351	transcription, DNA-templated	eif2ak3,tnip2,mxd4,slbp,nkx1-1,ctbp1,znf518b,lyar,msx1,wfs1,htra3,ppargc1a,klf3,apbb2,slc30a9,cnot7,hmgb2,smarca5,bbs7,pitx2,neurog2,camk2d,tet2,ube2d3,snca,g3bp2,pias4,hmg20b,rfx2,jund,ell,epha5,ncbp1,cep290,polr1e,klf2,hopx,gatad2a,tle2,klf4,ift74,glis3,dmrt1,klf9,tle4,tle1,znf367,syk,nfil3,rnf31,prmt5,chd8,znf219,tbx3,hic2,mapk1,ran,ncor2,cmklr1,tesc,suds3,xbp1,lztr1,phax,jmy,zfyve16,ssbp2,ccn…	11.0499
68	9.14116e-12	GO:2001141	regulation of RNA biosynthetic process	eif2ak3,tnip2,mxd4,nkx1-1,ctbp1,znf518b,lyar,msx1,wfs1,htra3,ppargc1a,klf3,apbb2,slc30a9,cnot7,hmgb2,smarca5,bbs7,pitx2,neurog2,camk2d,tet2,ube2d3,snca,g3bp2,pias4,hmg20b,rfx2,jund,ell,epha5,cep290,klf2,hopx,gatad2a,tle2,klf4,ift74,glis3,dmrt1,klf9,tle4,tle1,znf367,syk,nfil3,rnf31,prmt5,chd8,znf219,tbx3,hic2,mapk1,ran,ncor2,cmklr1,tesc,suds3,xbp1,lztr1,jmy,zfyve16,ssbp2,ccnh,nr2f1,chd1,mier3,znf1…	11.039
69	1.69998e-11	GO:0019438	aromatic compound biosynthetic process	eif2ak3,tnip2,mxd4,slbp,nkx1-1,ctbp1,znf518b,lyar,msx1,wfs1,htra3,ppargc1a,klf3,apbb2,slc30a9,cnot7,acsl1,dctd,hmgb2,smarca5,bbs7,pitx2,neurog2,camk2d,tet2,ube2d3,snca,g3bp2,pias4,hmg20b,rfx2,jund,ell,epha5,ncbp1,cep290,polr1e,klf2,hopx,gatad2a,tle2,klf4,ift74,glis3,dmrt1,klf9,rfk,psat1,tle4,tle1,znf367,syk,nfil3,rnf31,prmt5,chd8,znf219,tbx3,dcp2,mmab,slc25a1,hic2,mapk1,ran,ncor2,cmklr1,tesc,rfc5…	10.7696
70	1.8262e-11	GO:0016070	RNA metabolic process	eif2ak3,tnip2,mxd4,slbp,nkx1-1,ctbp1,znf518b,lyar,msx1,wfs1,htra3,dhx15,ppargc1a,klf3,apbb2,slc30a9,cnot7,hmgb2,rbm46,plrg1,smarca5,bbs7,pitx2,neurog2,camk2d,aimp1,tet2,ube2d3,snca,g3bp2,pias4,hmg20b,mex3d,ptbp1,rfx2,lsm4,jund,ell,epha5,ncbp1,ptbp3,cep290,polr1e,cherp,klf2,hopx,gatad2a,tle2,klf4,ift74,psip1,glis3,dmrt1,klf9,tle4,tle1,znf367,syk,nfil3,rnf31,prmt5,chd8,znf219,tbx3,dcp2,hic2,mapk1,p…	10.7385
71	2.50095e-11	GO:0006139	nucleobase-containing compound metabolic process	eif2ak3,tnip2,mxd4,slbp,nkx1-1,uvssa,ctbp1,znf518b,lyar,msx1,wfs1,htra3,dhx15,ppargc1a,klf3,pds5a,apbb2,slc30a9,cnot7,acsl1,dctd,neil3,hmgb2,rbm46,plrg1,smarca5,bbs7,pitx2,neurog2,camk2d,aimp1,tet2,ube2d3,snca,g3bp2,pias4,hmg20b,mex3d,ptbp1,rfx2,lsm4,jund,ell,epha5,ncbp1,ptbp3,cep290,polr1e,gne,cherp,klf2,hopx,gatad2a,tle2,klf4,ift74,psip1,glis3,dmrt1,klf9,rfk,tle4,tle1,znf367,syk,nfil3,rnf31,prm…	10.6019
72	2.72532e-11	GO:0097659	nucleic acid-templated transcription	eif2ak3,tnip2,mxd4,slbp,nkx1-1,ctbp1,znf518b,lyar,msx1,wfs1,htra3,ppargc1a,klf3,apbb2,slc30a9,cnot7,hmgb2,smarca5,bbs7,pitx2,neurog2,camk2d,tet2,ube2d3,snca,g3bp2,pias4,hmg20b,rfx2,jund,ell,epha5,ncbp1,cep290,polr1e,klf2,hopx,gatad2a,tle2,klf4,ift74,glis3,dmrt1,klf9,tle4,tle1,znf367,syk,nfil3,rnf31,prmt5,chd8,znf219,tbx3,hic2,mapk1,ran,ncor2,cmklr1,tesc,suds3,xbp1,lztr1,phax,jmy,zfyve16,ssbp2,ccn…	10.5646
73	3.72741e-11	GO:0032774	RNA biosynthetic process	eif2ak3,tnip2,mxd4,slbp,nkx1-1,ctbp1,znf518b,lyar,msx1,wfs1,htra3,ppargc1a,klf3,apbb2,slc30a9,cnot7,hmgb2,smarca5,bbs7,pitx2,neurog2,camk2d,tet2,ube2d3,snca,g3bp2,pias4,hmg20b,rfx2,jund,ell,epha5,ncbp1,cep290,polr1e,klf2,hopx,gatad2a,tle2,klf4,ift74,glis3,dmrt1,klf9,tle4,tle1,znf367,syk,nfil3,rnf31,prmt5,chd8,znf219,tbx3,hic2,mapk1,ran,ncor2,cmklr1,tesc,suds3,xbp1,lztr1,phax,jmy,zfyve16,ssbp2,ccn…	10.4286
74	3.84499e-11	GO:1901360	organic cyclic compound metabolic process	cyp26b1,eif2ak3,tnip2,mxd4,slbp,nkx1-1,uvssa,ctbp1,znf518b,lyar,msx1,wfs1,htra3,dhx15,ppargc1a,klf3,pds5a,apbb2,slc30a9,cnot7,acsl1,dctd,neil3,hmgb2,msmo1,rbm46,plrg1,smarca5,bbs7,pitx2,neurog2,camk2d,aimp1,tet2,ube2d3,snca,abcg2,g3bp2,pias4,hmg20b,mex3d,ptbp1,rfx2,lsm4,jund,ell,epha5,ncbp1,ptbp3,cep290,polr1e,gne,cherp,klf2,hopx,gatad2a,tle2,klf4,ift74,psip1,ttc39b,glis3,dmrt1,klf9,rfk,psat1,tle…	10.4151
75	3.8783e-11	GO:0051172	negative regulation of nitrogen compound metabolic process	avp,paip2b,eif2ak3,mxd4,uvssa,ctbp1,lyar,msx1,wfs1,ppargc1a,klf3,cnot7,hmgb2,rbm46,smarca5,spry1,ube2d3,eif4e,snca,pias4,hmg20b,mex3d,ptbp1,jund,ptbp3,klf2,gatad2a,tle2,klf4,glis3,dmrt1,gnaq,tle4,tle1,nfil3,prmt5,chd8,znf219,tbx3,dcp2,crkl,hic2,ncor2,sh2b3,tesc,pebp1,suds3,tnfaip8,sema6a,enc1,msh3,nr2f1,cast,mier3,nnt,paip1,znf131,nedd4l,atp8b1,mbd2,smad2,celf4,prdm15,bace2,ets2,runx1,olig2,app,n…	10.4114
76	3.911e-11	GO:0018130	heterocycle biosynthetic process	eif2ak3,tnip2,mxd4,slbp,nkx1-1,ctbp1,znf518b,lyar,msx1,wfs1,htra3,ppargc1a,klf3,apbb2,slc30a9,cnot7,acsl1,dctd,hmgb2,smarca5,bbs7,pitx2,neurog2,camk2d,tet2,ube2d3,snca,g3bp2,pias4,hmg20b,rfx2,jund,ell,epha5,ncbp1,cep290,polr1e,klf2,hopx,gatad2a,tle2,klf4,ift74,glis3,dmrt1,klf9,rfk,psat1,tle4,tle1,znf367,syk,nfil3,rnf31,prmt5,chd8,znf219,tbx3,dcp2,mmab,slc25a1,hic2,mapk1,ran,ncor2,cmklr1,tesc,rfc5…	10.4077
77	4.29742e-11	GO:0006725	cellular aromatic compound metabolic process	eif2ak3,tnip2,mxd4,slbp,nkx1-1,uvssa,ctbp1,znf518b,lyar,msx1,wfs1,htra3,dhx15,ppargc1a,klf3,pds5a,apbb2,slc30a9,cnot7,acsl1,dctd,neil3,hmgb2,rbm46,plrg1,smarca5,bbs7,pitx2,neurog2,camk2d,aimp1,tet2,ube2d3,snca,abcg2,g3bp2,pias4,hmg20b,mex3d,ptbp1,rfx2,lsm4,jund,ell,epha5,ncbp1,ptbp3,cep290,polr1e,gne,cherp,klf2,hopx,gatad2a,tle2,klf4,ift74,psip1,glis3,dmrt1,klf9,rfk,psat1,tle4,tle1,znf367,syk,nfi…	10.3668
78	5.47594e-11	GO:0034654	nucleobase-containing compound biosynthetic process	eif2ak3,tnip2,mxd4,slbp,nkx1-1,ctbp1,znf518b,lyar,msx1,wfs1,htra3,ppargc1a,klf3,apbb2,slc30a9,cnot7,acsl1,dctd,hmgb2,smarca5,bbs7,pitx2,neurog2,camk2d,tet2,ube2d3,snca,g3bp2,pias4,hmg20b,rfx2,jund,ell,epha5,ncbp1,cep290,polr1e,klf2,hopx,gatad2a,tle2,klf4,ift74,glis3,dmrt1,klf9,rfk,tle4,tle1,znf367,syk,nfil3,rnf31,prmt5,chd8,znf219,tbx3,dcp2,slc25a1,hic2,mapk1,ran,ncor2,cmklr1,tesc,rfc5,suds3,xbp1…	10.2615
79	5.5913e-11	GO:0010605	negative regulation of macromolecule metabolic process	avp,paip2b,eif2ak3,mxd4,uvssa,ctbp1,lyar,msx1,wfs1,ppargc1a,klf3,pds5a,kdr,cnot7,hmgb2,rbm46,smarca5,spry1,ube2d3,eif4e,snca,pias4,hmg20b,mex3d,ptbp1,lsm4,jund,ncbp1,ptbp3,klf2,gatad2a,tle2,klf4,glis3,dmrt1,gnaq,tle4,tle1,nfil3,prmt5,chd8,znf219,tbx3,dcp2,crkl,hic2,ran,ncor2,sh2b3,erp29,tesc,pebp1,suds3,tnfaip8,sema6a,enc1,tnpo1,msh3,nr2f1,ttc37,cast,mier3,nnt,paip1,znf131,nedd4l,atp8b1,mbd2,ctif…	10.2525
80	5.95407e-11	GO:0010558	negative regulation of macromolecule biosynthetic process	paip2b,eif2ak3,mxd4,ctbp1,lyar,msx1,wfs1,klf3,pds5a,cnot7,hmgb2,smarca5,ube2d3,eif4e,snca,pias4,mex3d,jund,klf2,gatad2a,tle2,klf4,glis3,dmrt1,tle4,tle1,nfil3,prmt5,chd8,znf219,tbx3,dcp2,hic2,ncor2,suds3,enc1,msh3,nr2f1,mier3,znf131,nedd4l,atp8b1,mbd2,smad2,celf4,bace2,ets2,runx1,donson,olig2,nrip1,phf12,hic1,mnt,arid1a,id3,sfpq,sox13,elf3,trim33,ppm1d,lims1,klf12,kmt2d,pa2g4,foxo1,hmgb1,fgf9,pspc…	10.2252
81	7.02619e-11	GO:0046483	heterocycle metabolic process	eif2ak3,tnip2,mxd4,slbp,nkx1-1,uvssa,ctbp1,znf518b,lyar,msx1,wfs1,htra3,dhx15,ppargc1a,klf3,pds5a,apbb2,slc30a9,cnot7,acsl1,dctd,neil3,hmgb2,rbm46,plrg1,smarca5,bbs7,pitx2,neurog2,camk2d,aimp1,tet2,ube2d3,snca,abcg2,g3bp2,pias4,hmg20b,mex3d,ptbp1,rfx2,lsm4,jund,ell,epha5,ncbp1,ptbp3,cep290,polr1e,gne,cherp,klf2,hopx,gatad2a,tle2,klf4,ift74,psip1,glis3,dmrt1,klf9,rfk,psat1,tle4,tle1,znf367,syk,nfi…	10.1533
82	8.83139e-11	GO:0010468	regulation of gene expression	avp,paip2b,cyp26b1,eif2ak3,tnip2,mxd4,nkx1-1,ctbp1,znf518b,lyar,msx1,wfs1,htra3,ppargc1a,klf3,apbb2,slc30a9,kdr,cnot7,hmgb2,rbm46,smarca5,bbs7,pitx2,neurog2,camk2d,tet2,ube2d3,metap1,eif4e,snca,g3bp2,pias4,hmg20b,mex3d,ptbp1,rfx2,mknk2,lsm4,jund,ell,epha5,ncbp1,ptbp3,cep290,polr1e,klf2,hopx,gatad2a,tle2,aco1,klf4,ift74,glis3,dmrt1,klf9,tle4,tle1,znf367,syk,nfil3,rnf31,prmt5,chd8,znf219,tmem119,tb…	10.054
83	1.09109e-10	GO:0031327	negative regulation of cellular biosynthetic process	paip2b,eif2ak3,mxd4,ctbp1,lyar,msx1,wfs1,klf3,pds5a,cnot7,hmgb2,smarca5,ube2d3,eif4e,snca,pias4,mex3d,jund,klf2,gatad2a,tle2,klf4,glis3,dmrt1,tle4,tle1,nfil3,prmt5,chd8,znf219,tbx3,dcp2,hic2,ncor2,suds3,enc1,msh3,nr2f1,mier3,znf131,c1qtnf3,nedd4l,atp8b1,mbd2,smad2,celf4,bace2,ets2,runx1,donson,olig2,nrip1,phf12,hic1,ctns,mnt,arid1a,id3,sfpq,sox13,elf3,trim33,ppm1d,lims1,klf12,kmt2d,pa2g4,foxo1,hm…	9.96214
84	1.57521e-10	GO:0008152	metabolic process	avp,paip2b,cyp26b1,chmp3,eif2ak3,tnip2,mxd4,nat8l,fgfr3,slbp,nkx1-1,uvssa,ctbp1,hgfac,htt,fbxl5,hs3st1,znf518b,lyar,msx1,wfs1,man2b2,htra3,dhx15,ppargc1a,gba3,pgm2,rell1,klf3,pds5a,nsun7,apbb2,slc30a9,kdr,exoc1,lonrf1,cnot7,acsl1,dctd,aga,neil3,spcs3,hmgb2,cpe,msmo1,rbm46,plrg1,smarca5,usp38,ndufc1,mfsd8,plk4,spry1,bbs7,etnppl,pitx2,neurog2,camk2d,synpo2,aimp1,tet2,slc9b2,cisd2,ube2d3,adh5,metap1…	9.80266
85	1.61288e-10	GO:0031324	negative regulation of cellular metabolic process	avp,paip2b,eif2ak3,mxd4,uvssa,ctbp1,lyar,msx1,wfs1,ppargc1a,klf3,pds5a,cnot7,hmgb2,rbm46,smarca5,spry1,ube2d3,eif4e,snca,pias4,hmg20b,mex3d,ptbp1,jund,ell,ptbp3,klf2,gatad2a,tle2,klf4,glis3,dmrt1,gnaq,tle4,tle1,nfil3,prmt5,chd8,znf219,tbx3,dcp2,usp30,crkl,hic2,ncor2,sh2b3,tesc,pebp1,suds3,tnfaip8,sema6a,enc1,msh3,nr2f1,cast,mier3,nnt,paip1,znf131,c1qtnf3,nedd4l,atp8b1,mbd2,smad2,celf4,prdm15,bace…	9.7924
86	1.94124e-10	GO:0010033	response to organic substance	avp,cyp26b1,rab11fip5,eif2ak3,tnip2,fgfr3,uvssa,fgfrl1,fgfbp1,msx1,wfs1,s100p,htra3,dhx15,ppargc1a,klf3,kdr,cnot7,acsl1,hmgb2,hhip,smarca5,pgrmc2,spry1,camk2d,tet2,slc9b2,ube2d3,adh5,eif4e,snca,pias4,lpl,ptbp1,rfx2,jund,rab8a,epha5,ncbp1,ugcg,klf2,sh3gl2,plin2,tmem38b,klf4,klf9,gcnt1,gna14,gnaq,tle4,ctsv,syk,nfil3,rnf31,pck2,prmt5,crkl,mapk1,ran,fzd10,scarb1,ncor2,sh2b3,cmklr1,tesc,xbp1,slc12a2,l…	9.71192
87	2.88594e-10	GO:0043170	macromolecule metabolic process	avp,paip2b,cyp26b1,eif2ak3,tnip2,mxd4,fgfr3,slbp,nkx1-1,uvssa,ctbp1,hgfac,htt,fbxl5,hs3st1,znf518b,lyar,msx1,wfs1,man2b2,htra3,dhx15,ppargc1a,pgm2,rell1,klf3,pds5a,apbb2,slc30a9,kdr,lonrf1,cnot7,acsl1,aga,neil3,spcs3,hmgb2,cpe,rbm46,plrg1,smarca5,usp38,plk4,spry1,bbs7,pitx2,neurog2,camk2d,synpo2,aimp1,tet2,ube2d3,adh5,metap1,eif4e,tspan5,snca,herc6,g3bp2,pias4,hmg20b,mex3d,ptbp1,rfx2,oaz1,mknk2,c…	9.53971
88	3.23269e-10	GO:0010629	negative regulation of gene expression	paip2b,eif2ak3,mxd4,ctbp1,lyar,msx1,wfs1,klf3,kdr,cnot7,hmgb2,rbm46,smarca5,ube2d3,eif4e,snca,pias4,mex3d,ptbp1,lsm4,jund,ncbp1,ptbp3,klf2,gatad2a,tle2,klf4,glis3,dmrt1,tle4,tle1,nfil3,chd8,znf219,tbx3,dcp2,crkl,hic2,ran,ncor2,erp29,suds3,enc1,tnpo1,nr2f1,ttc37,cast,mier3,paip1,znf131,nedd4l,atp8b1,mbd2,ctif,rpl17,smad2,celf4,ets2,runx1,olig2,app,nrip1,phf12,flot2,hic1,mnt,arid1a,id3,pnrc2,sfpq,s…	9.49044
89	4.42428e-10	GO:0071704	organic substance metabolic process	avp,paip2b,cyp26b1,eif2ak3,tnip2,mxd4,nat8l,fgfr3,slbp,nkx1-1,uvssa,ctbp1,hgfac,htt,fbxl5,hs3st1,znf518b,lyar,msx1,wfs1,man2b2,htra3,dhx15,ppargc1a,gba3,pgm2,rell1,klf3,pds5a,apbb2,slc30a9,kdr,lonrf1,cnot7,acsl1,dctd,aga,neil3,spcs3,hmgb2,cpe,msmo1,rbm46,plrg1,smarca5,usp38,plk4,spry1,bbs7,etnppl,pitx2,neurog2,camk2d,synpo2,aimp1,tet2,ube2d3,adh5,metap1,eif4e,tspan5,snca,herc6,abcg2,g3bp2,pias4,h…	9.35416
90	5.29339e-10	GO:0071705	nitrogen compound transport	avp,rab11fip5,sfxn5,chmp3,slbp,stx18,scfd2,exoc1,spcs3,cpe,tbc1d9,ankrd50,bbs7,sec24b,aimp1,slc9b2,ube2d3,eif4e,snca,g3bp2,timm44,lpl,oaz1,rab8a,epha5,fras1,ncbp1,snx30,tomm5,cep290,cplx1,srp72,ift74,syk,rnf31,slc7a8,rab2b,c5orf30,gltp,cabp1,mapk1,ran,rilpl1,vps37b,clip1,erp29,tesc,xbp1,slc12a2,phax,hsd17b4,tmed7,col4a3bp,tnpo1,zfyve16,cetn3,snx18,ptger4,c1qtnf3,amacr,golph3,lman1,atp8b1,baat,rpl…	9.27627
91	5.61135e-10	GO:0009894	regulation of catabolic process	htt,fbxl5,ppargc1a,kdr,exoc1,cnot7,rbm46,mfsd8,bbs7,cisd2,snca,mex3d,oaz1,rab8a,sptlc1,mtmr3,dcp2,usp30,chfr,ulk1,scarb1,xbp1,tnpo1,rnf180,plk2,nnt,paip1,nedd4l,app,usp25,ift20,lamtor5,gpsm1,rnf19b,pabpc4,rnft1,ubac2,lrp1,pip4k2c,aaas,gpd1,foxo1,hmgb1,sesn3,nup205,timp3,vdac1,cnot8,hnrnpa0,csnk1a1,atp6v0e1,nampt,optn,snx33,anxa2,snx1,usp8,crtc3,furin,tmem150a,nup133,anp32a,adam9,keap1,ldlr,pacsin…	9.25093
92	8.14876e-10	GO:0006357	regulation of transcription by RNA polymerase II	tnip2,mxd4,nkx1-1,ctbp1,znf518b,lyar,msx1,wfs1,htra3,ppargc1a,klf3,slc30a9,cnot7,hmgb2,smarca5,bbs7,pitx2,neurog2,camk2d,tet2,ube2d3,snca,pias4,hmg20b,rfx2,jund,ell,klf2,hopx,gatad2a,klf4,ift74,glis3,dmrt1,klf9,tle4,znf367,nfil3,chd8,znf219,tbx3,hic2,ncor2,suds3,xbp1,jmy,zfyve16,ssbp2,ccnh,nr2f1,chd1,mier3,znf131,nedd4l,onecut2,mbd2,smad2,rnf165,prdm15,brwd1,ets2,runx1,olig2,app,nrip1,bhlha9,phf1…	9.08891
93	1.06479e-09	GO:0045184	establishment of protein localization	rab11fip5,chmp3,slbp,moap1,stx18,scfd2,exoc1,cep135,spcs3,tbc1d9,ankrd50,bbs7,sec24b,slc9b2,ube2d3,eif4e,timm44,lpl,oaz1,rab8a,epha5,fras1,ncbp1,snx30,tomm5,cep290,cplx1,srp72,ift74,syk,rnf31,rab2b,c5orf30,cabp1,mapk1,ran,rilpl1,vps37b,clip1,erp29,tesc,xbp1,phax,hsd17b4,tmed7,tnpo1,zfyve16,cetn3,snx18,ptger4,c1qtnf3,amacr,golph3,lman1,baat,rpl17,smad2,wrb,dscr3,cct8,chmp2b,gosr1,vps37d,casp1,ywha…	8.97274
94	1.0994e-09	GO:0010648	negative regulation of cell communication	avp,cyp26b1,rab11fip5,uvssa,htt,wfs1,htra3,cnot7,hmgb2,hhip,spry1,grid2,snca,pias4,tle2,sh3gl2,klf4,tle4,tle1,chd8,ncor2,sh2b3,pebp1,xbp1,lztr1,sema6a,arrdc3,plk2,c1qtnf3,adamts12,onecut2,acaa2,smad2,celf4,prdm15,hic1,tax1bp3,nlk,mnt,rabgef1,rab7b,trim33,gpr161,rap1a,cblb,tpt1,erbb3,lrp1,foxo1,amer2,fgf9,sesn3,timp3,tulp3,g3bp1,ppp2ca,hbegf,wwc2,spry4,csnk1a1,dusp1,drd1,egr1,chst11,rap1b,cnot2,pa…	8.95884
95	1.50283e-09	GO:0023057	negative regulation of signaling	avp,cyp26b1,rab11fip5,uvssa,htt,wfs1,htra3,cnot7,hmgb2,hhip,spry1,grid2,snca,pias4,tle2,sh3gl2,klf4,tle4,tle1,chd8,ncor2,sh2b3,pebp1,xbp1,lztr1,sema6a,arrdc3,plk2,c1qtnf3,adamts12,onecut2,acaa2,smad2,celf4,prdm15,hic1,tax1bp3,nlk,mnt,rabgef1,rab7b,trim33,gpr161,rap1a,cblb,tpt1,erbb3,lrp1,foxo1,amer2,fgf9,sesn3,timp3,tulp3,g3bp1,ppp2ca,hbegf,wwc2,spry4,csnk1a1,dusp1,drd1,egr1,chst11,rap1b,cnot2,pa…	8.82309
96	1.76624e-09	GO:0009790	embryo development	cyp26b1,msx1,kdr,rbm46,plk4,bbs7,sec24b,ell,fras1,cep290,klf2,hopx,klf4,chd8,tbx3,man2a1,mapk1,sh2b3,col4a3bp,mbd2,smad2,celf4,ets2,sod1,plxna2,arid1a,id3,grhl3,elf3,hipk1,gpr161,cul4a,acvr1b,krt8,racgap1,atp8a2,fgf9,tenm4,myo7a,tulp3,pitx1,msx2,chst11,frs2,cnot2,e2f7,lrig3,sema3c,sin3a,adam10,nr2f2,pcsk6,nup133,smad6,fgfr1,dnmt1,keap1,adm,ext2,traf6,fgf4,wt1,cfl1,lrp5,irx3,nasp,wls,cdc73,myh9,ep…	8.75295
97	2.46143e-09	GO:0006366	transcription by RNA polymerase II	tnip2,mxd4,slbp,nkx1-1,ctbp1,znf518b,lyar,msx1,wfs1,htra3,ppargc1a,klf3,slc30a9,cnot7,hmgb2,smarca5,bbs7,pitx2,neurog2,camk2d,tet2,ube2d3,snca,pias4,hmg20b,rfx2,jund,ell,ncbp1,klf2,hopx,gatad2a,klf4,ift74,glis3,dmrt1,klf9,tle4,znf367,nfil3,chd8,znf219,tbx3,hic2,ncor2,suds3,xbp1,phax,jmy,zfyve16,ssbp2,ccnh,nr2f1,ell2,chd1,mier3,znf131,nedd4l,onecut2,mbd2,smad2,rnf165,prdm15,brwd1,ets2,runx1,olig2,…	8.60881
98	2.91601e-09	GO:0033554	cellular response to stress	eif2ak3,tnip2,letm1,uvssa,moap1,msx1,wfs1,ppargc1a,rell1,pds5a,slc30a9,cnot7,neil3,hmgb2,camk2d,ube2d3,snca,pias4,klf2,klf4,ctsv,syk,mtmr3,tbx3,crkl,mapk1,ulk1,fzd10,erp29,rfc5,xbp1,jmy,col4a3bp,msh3,ccnh,plk2,ptger4,poli,acaa2,rcsd1,donson,sod1,app,usp25,taok1,hic1,zswim7,pdk3,baz1b,ywhae,arg2,rps6ka1,rpa2,sfpq,hipk1,rnft1,ppm1d,rad51d,vkorc1l1,c2orf40,tfdp1,cul4a,ubac2,tnfsf11,tpt1,ptges3,lrp1,…	8.53521
99	4.44444e-09	GO:0000278	mitotic cell cycle	chmp3,tacc3,htt,ncapg,pds5a,cep135,cnot7,plrg1,plk4,spry1,eif4e,cep290,mau2,klf4,dmrt1,prmt5,chfr,ran,clip1,ccnh,plk2,snx18,ska1,haus1,donson,app,chmp2b,btg3,taok1,ywhae,rpa2,rhoc,ppm1d,mis12,tfdp1,cul4a,sugt1,acvr1b,tuba1c,aaas,racgap1,ccna1,cnot8,ppp2ca,spdl1,dusp1,btg1,cnot2,e2f7,rint1,gnai1,optn,cep41,snx33,sin3a,cyp1a1,tmod3,usp8,prc1,ticrr,tipin,fgfr1,brd4,akap8l,cdkn2d,dnm2,aurkb,ccnd1,inc…	8.35218
100	5.08104e-09	GO:0042886	amide transport	rab11fip5,chmp3,slbp,stx18,scfd2,exoc1,spcs3,cpe,tbc1d9,ankrd50,bbs7,sec24b,aimp1,slc9b2,ube2d3,eif4e,timm44,lpl,oaz1,rab8a,epha5,fras1,ncbp1,snx30,tomm5,cep290,cplx1,srp72,ift74,syk,rnf31,rab2b,c5orf30,gltp,cabp1,mapk1,ran,rilpl1,vps37b,clip1,erp29,tesc,xbp1,phax,hsd17b4,tmed7,col4a3bp,tnpo1,zfyve16,cetn3,snx18,ptger4,c1qtnf3,amacr,golph3,lman1,baat,rpl17,smad2,dscr3,chmp2b,gosr1,vps37d,casp1,yw…	8.29405
101	6.06178e-09	GO:0051128	regulation of cellular component organization	avp,chmp3,tacc3,uvssa,ctbp1,moap1,htt,wdr1,stx18,msx1,ppargc1a,apbb2,atp8a1,kdr,cep135,plk4,kiaa1109,sec24b,camk2d,synpo2,ube2d3,grid2,snca,g3bp2,epha5,ncbp1,cplx1,ncln,sh3gl2,klf4,ptprd,dmrt1,abhd17b,syk,rnf31,prmt5,mtmr3,dcp2,usp30,crkl,mapk1,ulk1,fzd10,clip1,rhof,sema6a,jmy,enc1,ocln,zfyve16,nr2f1,plk2,ptger4,golph3,lman1,nedd4l,atp8b1,ska1,acaa2,brwd1,runx1,cct8,tmem97,app,chodl,chmp2b,taok1,…	8.2174
102	8.27659e-09	GO:0051649	establishment of localization in cell	rab11fip5,chmp3,letm1,slbp,moap1,htt,stx18,spcs3,tbc1d9,ankrd50,spry1,kiaa1109,bbs7,sec24b,camk2d,slc9b2,ube2d3,eif4e,snca,timm44,oaz1,rab8a,epha5,ncbp1,tomm5,cep290,cplx1,cherp,srp72,sh3gl2,tmem38b,ift74,psip1,syk,rnf31,rab2b,smtn,cabp1,mapk1,ran,rilpl1,vps37b,clip1,erp29,phax,hsd17b4,tmed7,col4a3bp,tnpo1,zfyve16,snx18,amacr,lman1,cplx4,baat,rpl17,dscr3,tmem50b,sod1,app,atp5j,chmp2b,gosr1,flot2,…	8.08215
103	1.0534e-08	GO:0070887	cellular response to chemical stimulus	cyp26b1,rab11fip5,eif2ak3,tnip2,fgfr3,uvssa,fgfrl1,fgfbp1,msx1,wfs1,htra3,ppargc1a,klf3,kdr,cnot7,acsl1,hmgb2,hhip,smarca5,pgrmc2,spry1,camk2d,slc9b2,ube2d3,adh5,eif4e,snca,abcg2,pias4,lpl,ptbp1,rfx2,mknk2,jund,rab8a,epha5,ncbp1,ugcg,klf2,sh3gl2,tmem38b,klf4,klf9,gna14,gnaq,tle4,syk,nfil3,rnf31,pck2,prmt5,crkl,mapk1,ran,fzd10,scarb1,ncor2,sh2b3,cmklr1,tesc,xbp1,slc12a2,lmnb1,sema6a,ocln,zfyve16,n…	7.97741
104	1.13406e-08	GO:0015833	peptide transport	rab11fip5,chmp3,slbp,stx18,scfd2,exoc1,spcs3,cpe,tbc1d9,ankrd50,bbs7,sec24b,aimp1,slc9b2,ube2d3,eif4e,timm44,lpl,oaz1,rab8a,epha5,fras1,ncbp1,snx30,tomm5,cep290,cplx1,srp72,ift74,syk,rnf31,rab2b,c5orf30,cabp1,mapk1,ran,rilpl1,vps37b,clip1,erp29,tesc,xbp1,phax,hsd17b4,tmed7,tnpo1,zfyve16,cetn3,snx18,ptger4,c1qtnf3,amacr,golph3,lman1,baat,rpl17,smad2,dscr3,chmp2b,gosr1,vps37d,casp1,ywhae,ift22,ift2…	7.94537
105	1.15628e-08	GO:0015031	protein transport	rab11fip5,chmp3,slbp,stx18,scfd2,exoc1,spcs3,tbc1d9,ankrd50,bbs7,sec24b,slc9b2,ube2d3,eif4e,timm44,lpl,oaz1,rab8a,epha5,fras1,ncbp1,snx30,tomm5,cep290,cplx1,srp72,ift74,syk,rnf31,rab2b,c5orf30,cabp1,mapk1,ran,rilpl1,vps37b,clip1,erp29,tesc,xbp1,phax,hsd17b4,tmed7,tnpo1,zfyve16,cetn3,snx18,ptger4,c1qtnf3,amacr,golph3,lman1,baat,rpl17,smad2,dscr3,chmp2b,gosr1,vps37d,casp1,ywhae,ift22,ift20,rabgef1,…	7.93694
106	1.20239e-08	GO:0051179	localization	avp,rab11fip5,sfxn5,chmp3,eif2ak3,letm1,slbp,moap1,htt,fgfbp1,wdr1,lyar,stx18,msx1,wfs1,s100p,ppargc1a,pcdh7,pgm2,apbb2,slc30a9,atp8a1,nipal1,scfd2,kdr,exoc1,cep135,acsl1,aga,spcs3,hmgb2,cpe,plrg1,tbc1d9,mfsd8,plk4,ankrd50,spry1,kiaa1109,bbs7,sec24b,pitx2,camk2d,aimp1,slc9b2,ube2d3,eif4e,tspan5,grid2,mmrn1,snca,abcg2,g3bp2,timm44,lpl,atp8b3,mex3d,oaz1,csnk1g2,rab8a,epha5,fras1,ncbp1,ugcg,snx30,to…	7.91995
107	1.62956e-08	GO:1903047	mitotic cell cycle process	chmp3,tacc3,htt,ncapg,pds5a,cep135,cnot7,plrg1,plk4,spry1,eif4e,cep290,mau2,klf4,dmrt1,prmt5,chfr,ran,ccnh,plk2,snx18,haus1,donson,app,chmp2b,taok1,ywhae,rpa2,rhoc,ppm1d,mis12,tfdp1,cul4a,acvr1b,aaas,racgap1,ccna1,cnot8,ppp2ca,spdl1,dusp1,cnot2,e2f7,rint1,gnai1,optn,cep41,snx33,sin3a,cyp1a1,tmod3,usp8,prc1,ticrr,tipin,fgfr1,brd4,akap8l,cdkn2d,dnm2,aurkb,ccnd1,incenp,rfwd3,e2f4,pola2,cfl1,lrp5,cdt…	7.78793
108	2.32661e-08	GO:0016055	Wnt signaling pathway	cpe,pias4,csnk1g2,tle2,klf4,gnaq,tle4,tle1,chd8,fzd10,depdc1b,mbd2,prdm15,runx1,app,hic1,tax1bp3,nlk,ift20,grhl3,macf1,gpc6,wdr61,lrp1,foxo1,amer2,fgf9,g3bp1,ppp2ca,csnk1a1,egr1,usp8,znf703,grk5,smarca4,ccnd1,lgr4,csnk2a2,ap2a2,plcb3,mark2,lrp5,cdh3,wls,cdc73,rhoa,ruvbl1,mitf,psmd6,fermt1,ppp3r1,esr1,snx3,sox2,wwtr1,cul3,ryk,sdc1,wnt9a,wnt3a,fzd8,bambi,nfatc1,sox4,cul1,egfr,lrrfip2,ctnnb1,apcdd1,…	7.63328
109	2.63916e-08	GO:0071702	organic substance transport	avp,rab11fip5,sfxn5,chmp3,slbp,stx18,atp8a1,scfd2,exoc1,acsl1,spcs3,cpe,tbc1d9,ankrd50,bbs7,sec24b,aimp1,slc9b2,ube2d3,eif4e,snca,g3bp2,timm44,lpl,atp8b3,oaz1,rab8a,epha5,fras1,ncbp1,ugcg,snx30,tomm5,cep290,cplx1,srp72,plin2,ift74,ttc39b,syk,rnf31,slc7a8,lrp10,rab2b,c5orf30,gltp,cabp1,slc25a1,mapk1,ran,scarb1,rilpl1,vps37b,clip1,erp29,tesc,xbp1,phax,hsd17b4,tmed7,col4a3bp,tnpo1,zfyve16,cetn3,snx1…	7.57853
110	2.75001e-08	GO:0009968	negative regulation of signal transduction	avp,cyp26b1,uvssa,htt,wfs1,htra3,cnot7,hmgb2,hhip,spry1,snca,pias4,tle2,sh3gl2,klf4,tle4,tle1,chd8,ncor2,sh2b3,pebp1,xbp1,lztr1,sema6a,arrdc3,c1qtnf3,adamts12,onecut2,acaa2,smad2,celf4,prdm15,hic1,tax1bp3,nlk,mnt,rabgef1,rab7b,trim33,gpr161,cblb,tpt1,erbb3,lrp1,foxo1,amer2,fgf9,sesn3,timp3,tulp3,g3bp1,ppp2ca,hbegf,wwc2,spry4,csnk1a1,dusp1,egr1,chst11,cnot2,pawr,gramd4,optn,rora,csk,crtc3,kif7,sma…	7.56067
111	2.93e-08	GO:0031329	regulation of cellular catabolic process	htt,fbxl5,kdr,exoc1,cnot7,rbm46,mfsd8,bbs7,cisd2,snca,mex3d,rab8a,sptlc1,mtmr3,dcp2,usp30,chfr,ulk1,scarb1,xbp1,tnpo1,rnf180,plk2,nnt,paip1,app,usp25,ift20,lamtor5,gpsm1,rnf19b,pabpc4,rnft1,ubac2,lrp1,pip4k2c,gpd1,foxo1,hmgb1,sesn3,timp3,vdac1,cnot8,hnrnpa0,csnk1a1,atp6v0e1,nampt,optn,snx33,anxa2,furin,tmem150a,anp32a,adam9,keap1,ldlr,pacsin3,pkp3,csnk2a2,herpud1,usp10,kdm4a,atp6v0b,qsox1,ep300,s…	7.53313
112	2.99681e-08	GO:0198738	cell-cell signaling by wnt	cpe,pias4,csnk1g2,tle2,klf4,gnaq,tle4,tle1,chd8,fzd10,depdc1b,mbd2,prdm15,runx1,app,hic1,tax1bp3,nlk,ift20,grhl3,macf1,gpc6,wdr61,lrp1,foxo1,amer2,fgf9,g3bp1,ppp2ca,csnk1a1,egr1,usp8,znf703,grk5,smarca4,ccnd1,lgr4,csnk2a2,ap2a2,plcb3,mark2,lrp5,cdh3,wls,cdc73,rhoa,ruvbl1,mitf,psmd6,fermt1,ppp3r1,esr1,snx3,sox2,wwtr1,cul3,ryk,sdc1,wnt9a,wnt3a,fzd8,bambi,nfatc1,sox4,cul1,egfr,lrrfip2,ctnnb1,apcdd1,…	7.52334
113	3.24927e-08	GO:0035556	intracellular signal transduction	avp,eif2ak3,tnip2,fgfr3,moap1,htt,msx1,wfs1,rell1,apbb2,kdr,exoc1,cnot7,spry1,camk2d,arhgef38,g3bp2,pias4,ptbp1,mknk2,rab8a,epha5,myo9b,cherp,tmem38b,klf4,dmrt1,gnaq,tle1,syk,rnf31,prmt5,rab2b,crkl,mapk1,fzd10,rhof,sh2b3,erp29,cmklr1,rfc5,pebp1,xbp1,lztr1,sema6a,jmy,arrdc3,depdc1b,plk2,ptger4,c1qtnf3,golph3,mapk4,c18orf32,smad2,arhgap31,prdm15,sod1,app,taok1,hic1,tax1bp3,casp1,map3k15,ywhae,ift22…	7.48821
114	4.45074e-08	GO:0022402	cell cycle process	cyp26b1,chmp3,tacc3,slbp,htt,msx1,ncapg,pds5a,apbb2,cep135,cnot7,plrg1,plk4,spry1,eif4e,cep290,mau2,klf4,dmrt1,prmt5,chfr,ran,rfc5,jmy,msh3,ccnh,cetn3,plk2,snx18,rxfp3,haus1,donson,app,chmp2b,taok1,ywhae,tbrg1,rpa2,sfpq,lamtor5,rhoc,rbbp4,ppm1d,rad51d,mis12,c2orf40,sept10,tfdp1,cul4a,acvr1b,aaas,racgap1,ccna1,rfc3,chordc1,eed,rhno1,cnot8,ppp2ca,spdl1,irf1,dusp1,msx2,cnot2,e2f7,wasl,mapk12,rint1,g…	7.35157
115	5.37113e-08	GO:0050794	regulation of cellular process	avp,paip2b,cyp26b1,rab11fip5,chmp3,eif2ak3,tnip2,mxd4,letm1,fgfr3,tacc3,nkx1-1,uvssa,ctbp1,fgfrl1,moap1,htt,fgfbp1,fbxl5,znf518b,wdr1,lyar,stx18,msx1,wfs1,htra3,ppargc1a,rell1,klf3,pds5a,apbb2,slc30a9,atp8a1,kdr,exoc1,cep135,cnot7,mtnr1a,acsl1,hmgb2,cpe,rbm46,plrg1,hhip,smarca5,pgrmc2,mfsd8,plk4,spry1,nudt6,kiaa1109,bbs7,sec24b,pitx2,neurog2,camk2d,synpo2,aimp1,arhgef38,tet2,slc9b2,cisd2,ube2d3,m…	7.26993
116	5.98094e-08	GO:0009719	response to endogenous stimulus	avp,fgfr3,uvssa,fgfrl1,fgfbp1,msx1,htra3,ppargc1a,klf3,acsl1,hmgb2,hhip,pgrmc2,spry1,ube2d3,eif4e,snca,lpl,ptbp1,jund,rab8a,epha5,ncbp1,ugcg,klf2,sh3gl2,tmem38b,klf4,klf9,gcnt1,gna14,gnaq,ctsv,syk,pck2,prmt5,crkl,mapk1,ran,ncor2,xbp1,zfyve16,nr2f1,ptger4,prlr,adamts12,fech,onecut2,mbd2,smad2,rnf165,brwd1,runx1,sod1,app,nrip1,nlk,arid1a,lamtor5,trim33,rap1a,syap1,lims1,ipo5,acvr1b,kmt2d,ptges3,lrp…	7.22323
117	6.04461e-08	GO:0071495	cellular response to endogenous stimulus	fgfr3,uvssa,fgfrl1,fgfbp1,msx1,htra3,ppargc1a,klf3,acsl1,hhip,pgrmc2,spry1,ube2d3,eif4e,snca,lpl,ptbp1,jund,rab8a,epha5,ncbp1,ugcg,klf2,sh3gl2,tmem38b,klf4,klf9,gna14,gnaq,pck2,prmt5,crkl,mapk1,ran,ncor2,xbp1,zfyve16,nr2f1,ptger4,prlr,adamts12,fech,onecut2,smad2,rnf165,brwd1,runx1,sod1,app,nrip1,nlk,arid1a,lamtor5,trim33,rap1a,syap1,lims1,ipo5,acvr1b,kmt2d,ptges3,lrp1,sp1,gpd1,foxo1,smad9,fgf9,pd…	7.21863
118	6.41842e-08	GO:0065009	regulation of molecular function	avp,eif2ak3,fgfr3,uvssa,htt,msx1,wfs1,ppargc1a,acsl1,hmgb2,tbc1d9,spry1,neurog2,camk2d,snca,g3bp2,pias4,lpl,angptl4,oaz1,ell,epha5,ncbp1,myo9b,mau2,klf4,rfk,gnaq,syk,rnf31,git2,cabp1,crkl,mapk1,ran,fzd10,scarb1,sh2b3,erp29,cmklr1,tesc,rfc5,pebp1,tnfaip8,jmy,msh3,ccnh,arrdc3,cast,rnf180,depdc1b,plk2,snx18,prlr,mtmr12,nedd4l,mbd2,smad2,arhgap31,ripk4,sod1,app,taok1,flot2,tax1bp3,casp1,map3k15,ywhae…	7.19257
119	7.33269e-08	GO:0033365	protein localization to organelle	eif2ak3,moap1,msx1,spcs3,cpe,plrg1,ube2d3,timm44,tomm5,srp72,mau2,abhd17b,syk,rnf31,cabp1,mapk1,ran,vps37b,hsd17b4,tnpo1,zfyve16,amacr,golph3,lman1,baat,rpl17,wrb,morc3,cct8,vps37d,ywhae,ift20,timm17a,tbrg1,rpa2,lamtor5,rap1a,rps10,kpna6,rpl23a,cct6a,mis12,cblb,tfdp1,ubac2,ipo5,gpc6,cog3,rps26,fgf9,tulp3,diaph1,spdl1,hspa4,drd1,cep83,rpl18a,cct2,pot1,optn,sin3a,adam10,abhd17c,nup133,zfand6,dnm2,c…	7.13474
120	7.89876e-08	GO:0009057	macromolecule catabolic process	fbxl5,wfs1,pgm2,cnot7,hmgb2,rbm46,usp38,bbs7,synpo2,ube2d3,snca,mex3d,oaz1,lsm4,ncbp1,abhd17b,ctsv,dcp2,usp30,chfr,vps37b,xbp1,enc1,tnpo1,ttc37,lnpep,rnf180,plk2,paip1,adamts12,nedd4l,ctif,rpl17,rnf165,bace2,ltn1,usp25,vps37d,pnrc2,rps10,rnf19b,pabpc4,rpl23a,rnft1,c2orf40,cul4a,ubac2,gpc6,wdr61,rps26,lrp1,foxo1,hmgb1,trim24,timp3,etf1,cnot8,ppp2ca,hnrnpa0,csnk1a1,hsp90b1,rpl18a,cnot2,snx33,anxa2,…	7.10244
121	9.77591e-08	GO:0006886	intracellular protein transport	slbp,stx18,spcs3,tbc1d9,sec24b,ube2d3,eif4e,timm44,oaz1,rab8a,ncbp1,tomm5,cep290,srp72,ift74,syk,rnf31,rab2b,cabp1,mapk1,ran,rilpl1,vps37b,clip1,erp29,hsd17b4,tmed7,tnpo1,zfyve16,amacr,lman1,baat,rpl17,dscr3,vps37d,ywhae,ift22,ift20,rabgef1,timm17a,sfpq,rab7b,atp1b1,atg3,rps10,kpna6,tmem30b,rpl23a,cblb,rab9a,grtp1,ubac2,ipo5,cog3,arf3,rps26,aaas,fgf9,zdhhc20,myo7a,sytl2,nup205,hspa4,drd1,rab24,hs…	7.00984
122	1.33764e-07	GO:0010467	gene expression	avp,paip2b,cyp26b1,eif2ak3,tnip2,mxd4,slbp,nkx1-1,ctbp1,znf518b,lyar,msx1,wfs1,htra3,dhx15,ppargc1a,klf3,apbb2,slc30a9,kdr,cnot7,spcs3,hmgb2,cpe,rbm46,plrg1,smarca5,bbs7,pitx2,neurog2,camk2d,aimp1,tet2,ube2d3,metap1,eif4e,tspan5,snca,g3bp2,pias4,hmg20b,mex3d,ptbp1,rfx2,mknk2,lsm4,jund,ell,epha5,ncbp1,ptbp3,cep290,polr1e,cherp,klf2,hopx,gatad2a,tle2,aco1,klf4,ift74,psip1,glis3,dmrt1,klf9,tle4,tle1…	6.87366
123	1.3581e-07	GO:0036211	protein modification process	avp,eif2ak3,tnip2,fgfr3,uvssa,ctbp1,htt,fbxl5,wfs1,man2b2,ppargc1a,rell1,kdr,lonrf1,cnot7,acsl1,aga,cpe,usp38,plk4,spry1,camk2d,tet2,ube2d3,adh5,metap1,snca,herc6,pias4,hmg20b,ptbp1,mknk2,csnk1g2,rab8a,epha5,ugcg,klf4,ptprd,abhd17b,gcnt1,gnaq,syk,rabggta,rnf31,prmt5,mtmr3,tmem119,man2a1,usp30,limk2,crkl,mapk1,chfr,ulk1,fzd10,setd1b,sh2b3,erp29,tesc,pebp1,suds3,lztr1,sema6a,enc1,ccnh,arrdc3,lnpep,…	6.86707
124	1.3581e-07	GO:0006464	cellular protein modification process	avp,eif2ak3,tnip2,fgfr3,uvssa,ctbp1,htt,fbxl5,wfs1,man2b2,ppargc1a,rell1,kdr,lonrf1,cnot7,acsl1,aga,cpe,usp38,plk4,spry1,camk2d,tet2,ube2d3,adh5,metap1,snca,herc6,pias4,hmg20b,ptbp1,mknk2,csnk1g2,rab8a,epha5,ugcg,klf4,ptprd,abhd17b,gcnt1,gnaq,syk,rabggta,rnf31,prmt5,mtmr3,tmem119,man2a1,usp30,limk2,crkl,mapk1,chfr,ulk1,fzd10,setd1b,sh2b3,erp29,tesc,pebp1,suds3,lztr1,sema6a,enc1,ccnh,arrdc3,lnpep,…	6.86707
125	1.71705e-07	GO:0033043	regulation of organelle organization	avp,chmp3,tacc3,uvssa,ctbp1,moap1,htt,wdr1,stx18,msx1,ppargc1a,kdr,cep135,plk4,sec24b,camk2d,synpo2,ube2d3,grid2,snca,g3bp2,epha5,cplx1,ptprd,dmrt1,rnf31,prmt5,mtmr3,dcp2,usp30,mapk1,ulk1,fzd10,clip1,rhof,jmy,plk2,ptger4,golph3,lman1,ska1,acaa2,cct8,chmp2b,taok1,ywhae,ift20,wasf2,grhl3,sfpq,atg3,rhoc,cct6a,tfdp1,wdr61,lrp1,pip4k2c,chordc1,eed,vdac1,g3bp1,diaph1,spdl1,dusp1,msx2,cct2,cnot2,wasl,po…	6.76522
126	1.89738e-07	GO:0048585	negative regulation of response to stimulus	avp,cyp26b1,uvssa,htt,wfs1,htra3,cnot7,hmgb2,hhip,spry1,grid2,snca,pias4,lpl,tle2,sh3gl2,klf4,tle4,tle1,chd8,c5orf30,ncor2,sh2b3,trafd1,pebp1,xbp1,lztr1,sema6a,arrdc3,plk2,ptger4,c1qtnf3,adamts12,onecut2,acaa2,smad2,celf4,prdm15,sod1,usp25,hic1,tax1bp3,nlk,mnt,rabgef1,arg2,rab7b,trim33,gpr161,cask,cblb,ubac2,tpt1,erbb3,lrp1,foxo1,amer2,fgf9,sesn3,timp3,tulp3,g3bp1,ppp2ca,hbegf,wwc2,spry4,csnk1a1,…	6.72184
127	2.65819e-07	GO:0048583	regulation of response to stimulus	avp,cyp26b1,eif2ak3,tnip2,letm1,fgfr3,uvssa,moap1,htt,fgfbp1,msx1,wfs1,htra3,ppargc1a,rell1,kdr,cnot7,hmgb2,hhip,spry1,camk2d,arhgef38,slc9b2,ube2d3,metap1,tspan5,grid2,snca,g3bp2,pias4,lpl,gng7,ptbp1,csnk1g2,epha5,ugcg,myo9b,cherp,ncln,tle2,sh3gl2,klf4,dmrt1,gnaq,tle4,tle1,syk,rnf31,prmt5,chd8,c5orf30,git2,crkl,mapk1,fzd10,ncor2,rhof,sh2b3,erp29,trafd1,cmklr1,rfc5,pebp1,xbp1,lztr1,sema6a,jmy,arr…	6.57541
128	3.15206e-07	GO:0007399	nervous system development	eif2ak3,tacc3,wdr1,msx1,ppargc1a,apbb2,hmgb2,hhip,pcdh18,mfsd8,bbs7,sec24b,pitx2,neurog2,eif4e,grid2,snca,hmg20b,rab8a,epha5,ugcg,cep290,cherp,sh3gl2,klf4,ptprd,ctsv,prmt5,chd8,tbx3,man2a1,crkl,mapk1,ulk1,fzd10,suds3,xbp1,sema6a,enc1,nr2f1,plk2,nedd4l,atp8b1,onecut2,rnf165,bace2,psmg1,runx1,olig2,sod1,app,atp5j,chodl,ctns,ywhae,pitpna,ift20,plxna2,arid1a,id3,grhl3,hipk1,gpr161,rap1a,gpsm1,macf1,a…	6.50141
129	3.15509e-07	GO:0043412	macromolecule modification	avp,eif2ak3,tnip2,fgfr3,uvssa,ctbp1,htt,fbxl5,wfs1,man2b2,ppargc1a,rell1,kdr,lonrf1,cnot7,acsl1,aga,cpe,usp38,plk4,spry1,camk2d,tet2,ube2d3,adh5,metap1,snca,herc6,pias4,hmg20b,ptbp1,mknk2,csnk1g2,rab8a,epha5,ugcg,gatad2a,klf4,ptprd,abhd17b,gcnt1,gnaq,syk,rabggta,rnf31,prmt5,mtmr3,tmem119,man2a1,usp30,limk2,crkl,mapk1,chfr,pus1,ulk1,fzd10,setd1b,sh2b3,erp29,tesc,pebp1,suds3,lztr1,sema6a,enc1,ccnh,…	6.50099
130	3.45236e-07	GO:0065007	biological regulation	avp,paip2b,cyp26b1,rab11fip5,chmp3,eif2ak3,tnip2,mxd4,letm1,fgfr3,tacc3,nkx1-1,uvssa,ctbp1,fgfrl1,moap1,htt,fgfbp1,fbxl5,znf518b,wdr1,lyar,stx18,msx1,wfs1,htra3,ppargc1a,rell1,klf3,pds5a,apbb2,slc30a9,atp8a1,kdr,exoc1,cep135,cnot7,mtnr1a,acsl1,hmgb2,cpe,rbm46,plrg1,hhip,smarca5,tbc1d9,pgrmc2,mfsd8,plk4,spry1,nudt6,kiaa1109,bbs7,sec24b,pitx2,neurog2,camk2d,synpo2,aimp1,arhgef38,tet2,slc9b2,cisd2,u…	6.46188
131	3.9927e-07	GO:0009056	catabolic process	cyp26b1,chmp3,htt,fbxl5,wfs1,man2b2,ppargc1a,pgm2,kdr,exoc1,cnot7,acsl1,hmgb2,rbm46,usp38,mfsd8,bbs7,synpo2,tet2,cisd2,ube2d3,adh5,snca,lpl,mex3d,oaz1,lsm4,rab8a,ncbp1,tomm5,abhd17b,ctsv,auh,sptlc1,pck2,mtmr3,dcp2,usp30,chfr,ulk1,scarb1,vps37b,xbp1,hsd17b4,enc1,tnpo1,mccc2,ttc37,lnpep,rnf180,plk2,nnt,paip1,amacr,adamts12,nedd4l,lipg,ctif,acaa2,rpl17,rnf165,bace2,ltn1,app,chmp2b,liph,usp25,aldoc,e…	6.39873
132	4.42747e-07	GO:0044248	cellular catabolic process	cyp26b1,chmp3,htt,fbxl5,wfs1,ppargc1a,pgm2,kdr,exoc1,cnot7,acsl1,hmgb2,rbm46,usp38,mfsd8,bbs7,synpo2,tet2,cisd2,ube2d3,adh5,snca,lpl,mex3d,lsm4,rab8a,ncbp1,tomm5,ctsv,auh,sptlc1,pck2,mtmr3,dcp2,usp30,chfr,ulk1,scarb1,vps37b,xbp1,hsd17b4,enc1,tnpo1,mccc2,ttc37,lnpep,rnf180,plk2,nnt,paip1,amacr,adamts12,nedd4l,lipg,ctif,acaa2,rpl17,ltn1,app,chmp2b,usp25,emc6,vps37d,ift20,arg2,pnrc2,lamtor5,atg3,rps…	6.35384
133	5.35777e-07	GO:0051246	regulation of protein metabolic process	avp,paip2b,eif2ak3,fgfr3,uvssa,ctbp1,htt,fbxl5,wfs1,ppargc1a,rell1,kdr,cnot7,acsl1,spry1,bbs7,camk2d,metap1,eif4e,snca,pias4,hmg20b,mex3d,ptbp1,oaz1,mknk2,ncbp1,klf2,aco1,klf4,gnaq,syk,prmt5,tmem119,crkl,mapk1,chfr,fzd10,sh2b3,erp29,tesc,pebp1,tnfaip8,sema6a,enc1,ccnh,arrdc3,cast,rnf180,plk2,dhx29,nnt,paip1,prlr,nedd4l,lipg,ctif,celf4,prdm15,bace2,sod1,ltn1,app,usp25,taok1,flot2,casp1,map3k15,ywh…	6.27102
134	5.89451e-07	GO:1902531	regulation of intracellular signal transduction	eif2ak3,tnip2,fgfr3,htt,msx1,wfs1,rell1,kdr,spry1,camk2d,arhgef38,pias4,ptbp1,myo9b,cherp,klf4,tle1,syk,rnf31,prmt5,crkl,mapk1,fzd10,rhof,sh2b3,erp29,cmklr1,rfc5,pebp1,xbp1,lztr1,sema6a,jmy,arrdc3,depdc1b,plk2,c1qtnf3,golph3,c18orf32,arhgap31,prdm15,sod1,app,taok1,hic1,casp1,map3k15,rabgef1,rpa2,sfpq,lamtor5,hipk1,rap1a,rhoc,rbbp4,lims1,tnfsf11,tpt1,erbb3,lrp1,pip4k2c,racgap1,foxo1,rfc3,hmgb1,tnf…	6.22955
135	8.2015e-07	GO:1901701	cellular response to oxygen-containing compound	cyp26b1,rab11fip5,tnip2,ppargc1a,klf3,hmgb2,slc9b2,adh5,eif4e,snca,lpl,rab8a,epha5,klf2,klf4,klf9,gna14,gnaq,pck2,prmt5,crkl,mapk1,fzd10,scarb1,tesc,xbp1,ptger4,prlr,fech,brwd1,sod1,app,nrip1,pdk3,casp1,id3,lamtor5,rap1a,syap1,ipo5,lrp1,sp1,smarcd1,gpd1,foxo1,hmgb1,pdgfd,sesn3,p2ry2,chrm2,trim24,drd1,msx2,atp6v0e1,egr1,hsp90b1,rap1b,pawr,gpr37,nampt,gnai1,sin3a,rora,csk,usp8,pde8a,znf703,adam9,pt…	6.08611
136	9.72121e-07	GO:0051726	regulation of cell cycle	chmp3,tacc3,ctbp1,msx1,apbb2,cep135,cnot7,plrg1,plk4,nudt6,eif4e,jund,cep290,klf4,dmrt1,prmt5,tbx3,chfr,jmy,ccnh,plk2,rxfp3,haus1,donson,app,chmp2b,btg3,taok1,ywhae,mnt,tbrg1,id3,rpa2,sfpq,lamtor5,rbbp4,rad51d,tfdp1,cul4a,ipo5,racgap1,ccna1,cdk8,chordc1,eed,rhno1,cnot8,spdl1,irf1,dusp1,msx2,btg1,cnot2,e2f7,mapk12,rint1,gnai1,cep41,sin3a,cyp1a1,tmod3,prc1,ticrr,nr2f2,znf703,tipin,fgfr1,grk5,notch2…	6.01228
137	1.00079e-06	GO:0072657	protein localization to membrane	moap1,cpe,tspan5,rab8a,cplx1,srp72,crkl,rilpl1,vps37b,clip1,tesc,golph3,rpl17,wrb,flot2,vps37d,ywhae,ift20,rabgef1,atp1b1,atg3,rap1a,rps10,ldlrap1,macf1,rpl23a,tfdp1,gpc6,rps26,lrp1,zdhhc20,sytl2,hspa4,rpl18a,rab3ip,optn,anxa2,csk,zdhhc12,adam10,tmem150a,vamp8,ikbkb,rab3d,crb3,fis1,ppfia1,lin7c,pkp3,cdh1,micall1,gga1,dag1,rab3gap2,ppp2r5a,ttc7a,ppp3r1,rps12,dlg1,tp63,ssr3,prkci,ywhaq,wnt3a,gorasp…	5.99966
138	1.44991e-06	GO:0022008	neurogenesis	wdr1,apbb2,hmgb2,hhip,mfsd8,sec24b,pitx2,neurog2,eif4e,grid2,hmg20b,rab8a,epha5,ugcg,cep290,sh3gl2,klf4,ptprd,prmt5,man2a1,crkl,mapk1,ulk1,fzd10,xbp1,sema6a,enc1,nr2f1,plk2,nedd4l,atp8b1,onecut2,rnf165,bace2,runx1,olig2,sod1,app,chodl,ywhae,pitpna,ift20,plxna2,id3,hipk1,rap1a,macf1,alcam,erbb3,lrp1,racgap1,hmgb1,atp8a2,tenm4,myo7a,tulp3,jade2,drd1,dpysl3,ntn4,frs2,wasl,sema3c,cdnf,rora,csk,znf609…	5.83866
139	1.94551e-06	GO:0065008	regulation of biological quality	avp,cyp26b1,rab11fip5,tnip2,letm1,moap1,htt,fbxl5,wdr1,lyar,msx1,wfs1,ppargc1a,slc30a9,atp8a1,kdr,acsl1,hmgb2,cpe,rbm46,camk2d,aimp1,slc9b2,adh5,metap1,grid2,mmrn1,snca,abcg2,g3bp2,hmg20b,lpl,atp8b3,mex3d,angptl4,rab8a,epha5,ugcg,ptbp3,cplx1,cherp,klf2,ncln,aco1,plin2,tmem38b,klf4,ttc39b,ptprd,abhd17b,gna14,gnaq,syk,pck2,slc7a8,znf219,smtn,tmem119,tbx3,dcp2,crkl,mapk1,chfr,scarb1,ncor2,rhof,sh2b3…	5.71097
140	2.0538e-06	GO:0009792	embryo development ending in birth or egg hatching	msx1,rbm46,plk4,sec24b,ell,klf2,hopx,chd8,tbx3,man2a1,mapk1,col4a3bp,smad2,celf4,plxna2,arid1a,grhl3,elf3,gpr161,cul4a,acvr1b,krt8,fgf9,tulp3,chst11,cnot2,e2f7,sema3c,sin3a,adam10,nr2f2,nup133,fgfr1,keap1,adm,traf6,cfl1,nasp,myh9,ep300,tgfb2,slc30a1,six2,epas1,rtn4,dlg1,skil,cul3,acsl4,hs6st1,sox11,kidins220,apob,nos3,wnt9a,wnt3a,xrcc2,dnajb6,wdr60,itgb1,zeb1,st8sia6,nmt1,sox4,foxc1,egfr,ctnnb1,e…	5.68744
141	2.11031e-06	GO:0048699	generation of neurons	wdr1,apbb2,hmgb2,hhip,mfsd8,sec24b,pitx2,neurog2,eif4e,grid2,hmg20b,rab8a,epha5,ugcg,cep290,sh3gl2,klf4,ptprd,prmt5,man2a1,crkl,mapk1,ulk1,fzd10,xbp1,sema6a,enc1,nr2f1,plk2,nedd4l,atp8b1,onecut2,rnf165,runx1,olig2,sod1,app,chodl,ywhae,pitpna,ift20,plxna2,id3,hipk1,rap1a,macf1,alcam,lrp1,racgap1,hmgb1,atp8a2,tenm4,myo7a,tulp3,jade2,drd1,dpysl3,ntn4,frs2,wasl,sema3c,cdnf,rora,znf609,adam10,nr2f2,me…	5.67565
142	2.11437e-06	GO:0043009	chordate embryonic development	msx1,rbm46,plk4,sec24b,ell,klf2,hopx,chd8,tbx3,man2a1,mapk1,col4a3bp,smad2,plxna2,arid1a,grhl3,elf3,gpr161,cul4a,acvr1b,krt8,fgf9,tulp3,chst11,cnot2,e2f7,sema3c,sin3a,adam10,nr2f2,nup133,fgfr1,keap1,adm,traf6,cfl1,nasp,myh9,ep300,tgfb2,slc30a1,six2,epas1,rtn4,dlg1,skil,cul3,hs6st1,sox11,kidins220,apob,nos3,wnt9a,wnt3a,xrcc2,dnajb6,wdr60,itgb1,zeb1,st8sia6,nmt1,sox4,foxc1,egfr,ctnnb1,eomes,tfap2a,…	5.67482
143	2.44143e-06	GO:0030182	neuron differentiation	apbb2,mfsd8,sec24b,pitx2,neurog2,eif4e,grid2,hmg20b,rab8a,epha5,ugcg,cep290,sh3gl2,klf4,ptprd,crkl,mapk1,ulk1,fzd10,xbp1,sema6a,enc1,nr2f1,plk2,nedd4l,atp8b1,onecut2,rnf165,runx1,olig2,sod1,app,chodl,pitpna,ift20,plxna2,id3,hipk1,rap1a,macf1,alcam,lrp1,hmgb1,atp8a2,tenm4,myo7a,tulp3,jade2,drd1,dpysl3,ntn4,frs2,wasl,sema3c,cdnf,rora,adam10,mef2a,dbnl,ddx56,spg11,fgfr1,dnm2,dock7,calr,ier2,zswim4,e…	5.61236
144	2.89806e-06	GO:0044093	positive regulation of molecular function	eif2ak3,fgfr3,htt,ppargc1a,acsl1,hmgb2,tbc1d9,neurog2,snca,epha5,ncbp1,myo9b,mau2,klf4,rfk,gnaq,syk,rnf31,git2,crkl,mapk1,ran,fzd10,scarb1,erp29,tesc,rfc5,jmy,msh3,arrdc3,depdc1b,plk2,snx18,prlr,mbd2,arhgap31,ripk4,sod1,app,taok1,flot2,tax1bp3,casp1,map3k15,grhl3,epb41,rab7b,atp1b1,rap1a,rhoc,gpsm1,syap1,lims1,rp2,grtp1,fgf14,tnfsf11,rhebl1,erbb3,ptges3,lrp1,racgap1,rfc3,hmgb1,pdgfd,stim1,nmur2,p…	5.53789
145	3.17616e-06	GO:0001701	in utero embryonic development	msx1,rbm46,plk4,ell,klf2,hopx,chd8,tbx3,man2a1,mapk1,col4a3bp,smad2,elf3,cul4a,acvr1b,krt8,cnot2,e2f7,sin3a,adam10,nr2f2,fgfr1,keap1,adm,nasp,myh9,slc30a1,epas1,rtn4,skil,cul3,hs6st1,kidins220,apob,nos3,wnt3a,xrcc2,dnajb6,itgb1,st8sia6,nmt1,foxc1,egfr,ctnnb1,eomes,edn1,dsc3,hey1,stk3,grhl2,zfat,fgfr2,ric8a,prmt1,ar,amot,ocrl,spint2,hif1a,arnt,arhgdig,cops3,pkd1,ihh,stk4,plcd3,tmem100,snai1,grb2,j…	5.4981
146	3.54306e-06	GO:0050789	regulation of biological process	avp,paip2b,cyp26b1,rab11fip5,chmp3,eif2ak3,tnip2,mxd4,letm1,fgfr3,tacc3,nkx1-1,uvssa,ctbp1,fgfrl1,moap1,htt,fgfbp1,fbxl5,znf518b,wdr1,lyar,stx18,msx1,wfs1,htra3,ppargc1a,rell1,klf3,pds5a,apbb2,slc30a9,atp8a1,kdr,exoc1,cep135,cnot7,mtnr1a,acsl1,hmgb2,cpe,rbm46,plrg1,hhip,smarca5,pgrmc2,mfsd8,plk4,spry1,nudt6,kiaa1109,bbs7,sec24b,pitx2,neurog2,camk2d,synpo2,aimp1,arhgef38,tet2,slc9b2,cisd2,ube2d3,m…	5.45062
147	4.06078e-06	GO:0048513	animal organ development	cyp26b1,eif2ak3,fgfr3,tacc3,fgfrl1,wdr1,lyar,msx1,wfs1,ppargc1a,kdr,hmgb2,cpe,dchs2,hhip,pcdh18,plk4,spry1,bbs7,sec24b,pitx2,tet2,slc9b2,eif4e,grid2,herc6,hmg20b,mknk2,epha5,fras1,ugcg,ptbp3,cep290,klf2,tle2,tmem38b,klf4,ift74,dmrt1,gcnt1,tle1,ctsv,syk,pck2,lrp10,prmt5,chd8,znf219,smtn,tmem119,tbx3,man2a1,limk2,crkl,mapk1,ncor2,sh2b3,tesc,suds3,xbp1,hsd17b4,sema6a,col4a3bp,arrdc3,ptger4,prlr,adam…	5.39139
148	4.64166e-06	GO:0007167	enzyme linked receptor protein signaling pathway	eif2ak3,fgfr3,fgfrl1,fgfbp1,msx1,htra3,kdr,hhip,spry1,ube2d3,snca,ptbp1,epha5,ncbp1,sh3gl2,ptprd,dmrt1,syk,crkl,mapk1,sh2b3,sema6a,zfyve16,lnpep,prlr,adamts12,onecut2,smad2,rnf165,brwd1,app,nlk,ift20,rabgef1,cnksr1,wasf2,trim33,cblb,acvr1b,cd63,erbb3,lrp1,foxo1,smad9,fgf9,pdgfd,sesn3,jade2,hnrnph1,hbegf,spry4,msx2,atp6v0e1,egr1,chst11,frs2,wasl,furin,pcsk6,znf703,smad6,fgfr1,adam9,dnm2,ephb4,fgf4…	5.33333
149	4.90705e-06	GO:1901564	organonitrogen compound metabolic process	avp,paip2b,eif2ak3,tnip2,nat8l,fgfr3,uvssa,ctbp1,hgfac,htt,fbxl5,hs3st1,wfs1,man2b2,htra3,ppargc1a,rell1,kdr,lonrf1,cnot7,acsl1,dctd,aga,spcs3,cpe,usp38,plk4,spry1,bbs7,camk2d,synpo2,aimp1,tet2,ube2d3,adh5,metap1,eif4e,tspan5,snca,herc6,abcg2,pias4,hmg20b,mex3d,ptbp1,oaz1,mknk2,csnk1g2,rab8a,epha5,ncbp1,ugcg,klf2,aco1,klf4,ptprd,ermp1,abhd17b,rfk,gcnt1,gnaq,psat1,ctsv,syk,auh,sptlc1,rabggta,rnf31…	5.30918
150	6.51672e-06	GO:0048731	system development	cyp26b1,eif2ak3,fgfr3,tacc3,fgfrl1,fgfbp1,wdr1,lyar,msx1,wfs1,ppargc1a,apbb2,kdr,hmgb2,cpe,dchs2,hhip,pcdh18,mfsd8,plk4,spry1,bbs7,sec24b,pitx2,neurog2,aimp1,tet2,slc9b2,eif4e,grid2,snca,herc6,hmg20b,angptl4,mknk2,rab8a,epha5,fras1,ugcg,ptbp3,cep290,cherp,klf2,tle2,sh3gl2,tmem38b,klf4,ift74,ptprd,dmrt1,gcnt1,tle1,ctsv,syk,pck2,lrp10,prmt5,chd8,znf219,smtn,tmem119,tbx3,man2a1,limk2,crkl,mapk1,ulk1…	5.18597
151	7.18306e-06	GO:0044267	cellular protein metabolic process	avp,paip2b,eif2ak3,tnip2,fgfr3,uvssa,ctbp1,htt,fbxl5,wfs1,man2b2,ppargc1a,rell1,kdr,lonrf1,cnot7,acsl1,aga,spcs3,cpe,usp38,plk4,spry1,bbs7,camk2d,aimp1,tet2,ube2d3,adh5,metap1,eif4e,tspan5,snca,herc6,pias4,hmg20b,mex3d,ptbp1,mknk2,csnk1g2,rab8a,epha5,ncbp1,ugcg,aco1,klf4,ptprd,abhd17b,gcnt1,gnaq,ctsv,syk,rabggta,rnf31,prmt5,mtmr3,tmem119,man2a1,usp30,limk2,crkl,mapk1,chfr,ulk1,fzd10,vps37b,setd1b…	5.14369
152	7.7897e-06	GO:0060429	epithelium development	cyp26b1,wdr1,msx1,kdr,hhip,plk4,spry1,kiaa1109,bbs7,sec24b,pitx2,fras1,ugcg,cep290,klf2,tmem38b,klf4,ift74,dmrt1,ctsv,pck2,tbx3,mapk1,rilpl1,xbp1,hsd17b4,marveld2,adamts12,onecut2,smad2,upk1b,ripk4,runx1,sod1,aldoc,ift20,plxna2,arg2,arid1a,id3,grhl3,elf3,gpr161,rap1a,rhoc,gpc6,tnfsf11,acvr1b,krt8,tnfrsf19,acat1,myo7a,aqp11,tulp3,vdac1,hbegf,msx2,btg1,ntn4,rap1b,frs2,e2f7,sema3c,anxa2,cyp1a1,furin…	5.10848
153	7.81227e-06	GO:1905114	cell surface receptor signaling pathway involved in cell-cell signaling	cpe,grid2,snca,pias4,csnk1g2,tle2,klf4,gnaq,tle4,tle1,chd8,fzd10,depdc1b,mbd2,celf4,prdm15,runx1,app,hic1,tax1bp3,nlk,ift20,grhl3,macf1,gpc6,wdr61,lrp1,foxo1,amer2,fgf9,g3bp1,ppp2ca,csnk1a1,egr1,usp8,znf703,grk5,smarca4,ccnd1,lgr4,csnk2a2,ap2a2,plcb3,mark2,lrp5,cbln1,cdh3,wls,cdc73,rhoa,ruvbl1,mitf,psmd6,fermt1,ppp3r1,esr1,snx3,sox2,wwtr1,cul3,ryk,sdc1,wnt9a,wnt3a,fzd8,bambi,nfatc1,sox4,cul1,egfr…	5.10722
154	7.91944e-06	GO:0046907	intracellular transport	chmp3,slbp,htt,stx18,spcs3,tbc1d9,ankrd50,bbs7,sec24b,ube2d3,eif4e,timm44,oaz1,rab8a,ncbp1,tomm5,cep290,srp72,ift74,psip1,syk,rnf31,rab2b,smtn,cabp1,mapk1,ran,rilpl1,vps37b,clip1,erp29,phax,hsd17b4,tmed7,col4a3bp,tnpo1,zfyve16,snx18,amacr,lman1,baat,rpl17,dscr3,tmem50b,sod1,app,atp5j,chmp2b,gosr1,flot2,vps37d,ywhae,ift22,ift20,rabgef1,pitpnm3,timm17a,sfpq,rab7b,atp1b1,atg3,rps10,kpna6,tmem30b,ldl…	5.10131
155	8.37411e-06	GO:0019538	protein metabolic process	avp,paip2b,eif2ak3,tnip2,fgfr3,uvssa,ctbp1,hgfac,htt,fbxl5,hs3st1,wfs1,man2b2,htra3,ppargc1a,rell1,kdr,lonrf1,cnot7,acsl1,aga,spcs3,cpe,usp38,plk4,spry1,bbs7,camk2d,synpo2,aimp1,tet2,ube2d3,adh5,metap1,eif4e,tspan5,snca,herc6,pias4,hmg20b,mex3d,ptbp1,oaz1,mknk2,csnk1g2,rab8a,epha5,ncbp1,ugcg,klf2,aco1,klf4,ptprd,ermp1,abhd17b,gcnt1,gnaq,ctsv,syk,rabggta,rnf31,prmt5,mtmr3,tmem119,man2a1,usp30,limk…	5.07706
156	8.45518e-06	GO:0010256	endomembrane system organization	chmp3,eif2ak3,htt,stx18,fhdc1,atp8b3,rfx2,ugcg,sh3gl2,tmem38b,prmt5,mapk1,vps37b,tmed7,col4a3bp,golph3,lman1,atp8b1,wrb,dnajc28,sod1,chmp2b,vps37d,cog3,aqp11,parp11,ppp2ca,csnk1a1,wasl,optn,snx33,usp8,tmed4,lman2l,akap8l,dnm2,pacsin3,aktip,fa2h,kifc3,stx5,hook1,stx6,tor1aip2,crb1,myh9,pde4dip,micall1,baiap2l2,prkcd,zfyve20,jagn1,tmf1,rab3gap2,tgfb2,rtn4,rab1a,arv1,snx3,pdcd10,agfg1,lpin1,gorasp1,…	5.07288
157	9.92629e-06	GO:0031647	regulation of protein stability	tnip2,htt,msx1,wfs1,ppargc1a,snca,ncln,gnaq,mapk1,chfr,tesc,xbp1,ccnh,nedd4l,morc3,cct8,usp25,flot2,zswim7,nlk,tbrg1,atp1b1,cct6a,sugt1,cog3,ptges3,trim24,cct2,usp8,aak1,calr,trim44,syvn1,cdc73,ep300,prkcd,usp4,pim1,rtn4,pdcd10,cul3,epha4,sox4,mylip,asph,stk3,pten,sirt1,park7,per3,taf1,rnf5,sav1,srebf1,crebbp,plk1,telo2,get4,rpl23,stk4,grn,mtmr9,usp47,tp53,pex6,derl1	5.00321
158	1.25794e-05	GO:0051234	establishment of localization	avp,rab11fip5,sfxn5,chmp3,letm1,slbp,moap1,htt,wdr1,lyar,stx18,wfs1,s100p,ppargc1a,pcdh7,pgm2,slc30a9,atp8a1,nipal1,scfd2,exoc1,cep135,acsl1,aga,spcs3,cpe,tbc1d9,mfsd8,ankrd50,spry1,kiaa1109,bbs7,sec24b,camk2d,aimp1,slc9b2,ube2d3,eif4e,grid2,mmrn1,snca,abcg2,g3bp2,timm44,lpl,atp8b3,oaz1,csnk1g2,rab8a,epha5,fras1,ncbp1,ugcg,snx30,tomm5,cep290,cplx1,cherp,srp72,aco1,sh3gl2,plin2,tmem38b,ift74,psip1…	4.90034
159	1.83856e-05	GO:0044265	cellular macromolecule catabolic process	fbxl5,wfs1,cnot7,hmgb2,rbm46,usp38,bbs7,ube2d3,mex3d,lsm4,ncbp1,ctsv,dcp2,usp30,chfr,vps37b,xbp1,enc1,tnpo1,ttc37,rnf180,plk2,paip1,adamts12,nedd4l,ctif,rpl17,ltn1,usp25,vps37d,pnrc2,rps10,rnf19b,pabpc4,rpl23a,rnft1,c2orf40,cul4a,ubac2,wdr61,rps26,lrp1,hmgb1,etf1,cnot8,ppp2ca,hnrnpa0,csnk1a1,hsp90b1,rpl18a,cnot2,anxa2,usp8,furin,anp32a,keap1,ldlr,aurkb,rnf167,pkp3,fen1,ppp6r3,csnk2a2,ap2a2,syvn1,…	4.73552
160	1.88422e-05	GO:0030111	regulation of Wnt signaling pathway	csnk1g2,tle2,gnaq,tle4,tle1,chd8,depdc1b,mbd2,prdm15,runx1,app,hic1,tax1bp3,nlk,ift20,macf1,lrp1,foxo1,amer2,fgf9,g3bp1,ppp2ca,csnk1a1,egr1,usp8,znf703,smarca4,lgr4,cdh3,wls,cdc73,ruvbl1,psmd6,fermt1,esr1,snx3,sox2,wwtr1,cul3,wnt3a,bambi,nfatc1,sox4,egfr,ctnnb1,apcdd1,cdh2,tmem64,frat1,stk3,rspo2,wisp1,fgfr2,zranb1,lzts2,ski,nphp4,gsk3a,rapgef1,emd,psma3,vangl2,zeb2,igfbp2,jup,stk4,psmc5,rnf213,s…	4.72487
161	2.04939e-05	GO:0050790	regulation of catalytic activity	avp,eif2ak3,fgfr3,uvssa,htt,acsl1,hmgb2,tbc1d9,spry1,camk2d,snca,lpl,angptl4,oaz1,ell,epha5,myo9b,klf4,rfk,gnaq,syk,git2,cabp1,crkl,mapk1,fzd10,scarb1,sh2b3,erp29,tesc,rfc5,pebp1,tnfaip8,msh3,ccnh,arrdc3,cast,rnf180,depdc1b,snx18,prlr,mtmr12,arhgap31,sod1,app,taok1,tax1bp3,casp1,map3k15,ywhae,plxna2,rps6ka1,grhl3,lamtor5,atp1b1,rap1a,rhoc,gpsm1,syap1,cblb,lims1,rp2,grtp1,ipo5,sugt1,tnfsf11,erbb3,…	4.68837
162	2.10114e-05	GO:0007346	regulation of mitotic cell cycle	tacc3,cep135,cnot7,plrg1,plk4,eif4e,cep290,klf4,dmrt1,prmt5,chfr,plk2,haus1,donson,app,chmp2b,btg3,taok1,ywhae,rpa2,tfdp1,cul4a,cnot8,spdl1,dusp1,btg1,cnot2,e2f7,rint1,gnai1,cep41,sin3a,cyp1a1,tmod3,ticrr,tipin,fgfr1,brd4,cdkn2d,aurkb,ccnd1,incenp,rfwd3,e2f4,lrp5,cdt1,cdc20,gadd45a,cdkn2c,cdc7,cdc73,ep300,psmd6,cenpf,dtl,zfp36l2,heca,dlg1,cul3,gigyf2,stag1,id2,wnt9a,anapc15,cdc25a,akap9,sox4,foxc…	4.67755
163	2.59354e-05	GO:0006810	transport	avp,rab11fip5,sfxn5,chmp3,letm1,slbp,moap1,htt,wdr1,lyar,stx18,wfs1,s100p,ppargc1a,pcdh7,pgm2,slc30a9,atp8a1,nipal1,scfd2,exoc1,acsl1,aga,spcs3,cpe,tbc1d9,mfsd8,ankrd50,kiaa1109,bbs7,sec24b,camk2d,aimp1,slc9b2,ube2d3,eif4e,grid2,mmrn1,snca,abcg2,g3bp2,timm44,lpl,atp8b3,oaz1,csnk1g2,rab8a,epha5,fras1,ncbp1,ugcg,snx30,tomm5,cep290,cplx1,cherp,srp72,aco1,sh3gl2,plin2,tmem38b,ift74,psip1,ttc39b,syk,r…	4.58611
164	2.721e-05	GO:0042981	regulation of apoptotic process	avp,eif2ak3,tnip2,moap1,htt,msx1,wfs1,ppargc1a,apbb2,kdr,hmgb2,hhip,camk2d,grid2,snca,pias4,angptl4,klf4,tle1,syk,sptlc1,rabggta,chd8,tbx3,erp29,suds3,xbp1,tnfaip8,jmy,cast,plk2,nnt,prlr,golph3,acaa2,sod1,casp1,ywhae,mnt,arg2,rps6ka1,id3,sfpq,lamtor5,ptrh2,tfdp1,tpt1,pa2g4,erbb3,lrp1,foxo1,hmgb1,trim24,timp3,dusp1,msx2,egr1,hsp90b1,chst11,btg1,rassf3,frs2,pawr,gramd4,sin3a,adam10,pdia3,zfand6,sma…	4.56527
165	4.11698e-05	GO:0006915	apoptotic process	avp,chmp3,eif2ak3,tnip2,fgfr3,moap1,htt,msx1,wfs1,ppargc1a,apbb2,kdr,hmgb2,hhip,camk2d,aimp1,ube2d3,grid2,snca,pias4,angptl4,mknk2,klf4,rfk,tle1,syk,sptlc1,rabggta,chd8,tbx3,crkl,mapk1,erp29,suds3,xbp1,tnfaip8,sema6a,jmy,cast,plk2,mrps30,nnt,prlr,golph3,acaa2,sod1,app,taok1,hic1,casp1,ywhae,mnt,arg2,rps6ka1,id3,sfpq,lamtor5,hipk1,atg3,ptrh2,tfdp1,cul4a,tpt1,acvr1b,pa2g4,erbb3,lrp1,krt8,foxo1,hmgb…	4.38542
166	4.3375e-05	GO:0048869	cellular developmental process	cyp26b1,eif2ak3,fgfr3,nkx1-1,ctbp1,wdr1,lyar,msx1,ppargc1a,apbb2,kdr,hmgb2,rbm46,hhip,mfsd8,plk4,spry1,kiaa1109,bbs7,sec24b,pitx2,neurog2,tet2,slc9b2,eif4e,grid2,herc6,hmg20b,lpl,ptbp1,rfx2,jund,rab8a,epha5,ugcg,ptbp3,cep290,klf2,hopx,sh3gl2,tmem38b,klf4,ift74,ptprd,dmrt1,ctsv,syk,pck2,prmt5,znf219,tmem119,tbx3,man2a1,crkl,mapk1,ulk1,fzd10,rilpl1,rhof,sh2b3,cmklr1,tesc,xbp1,hsd17b4,sema6a,col4a3b…	4.36276
167	4.38622e-05	GO:1901575	organic substance catabolic process	cyp26b1,fbxl5,wfs1,man2b2,ppargc1a,pgm2,cnot7,hmgb2,rbm46,usp38,bbs7,synpo2,tet2,ube2d3,adh5,snca,lpl,mex3d,oaz1,lsm4,ncbp1,abhd17b,ctsv,auh,pck2,dcp2,usp30,chfr,scarb1,vps37b,xbp1,hsd17b4,enc1,tnpo1,mccc2,ttc37,lnpep,rnf180,plk2,paip1,amacr,adamts12,nedd4l,lipg,ctif,acaa2,rpl17,rnf165,bace2,ltn1,app,liph,usp25,aldoc,vps37d,arg2,pnrc2,rps10,rnf19b,pabpc4,rpl23a,rnft1,c2orf40,cul4a,ubac2,gpc6,wdr6…	4.35791
168	4.79077e-05	GO:0044772	mitotic cell cycle phase transition	tacc3,cep135,cnot7,plrg1,plk4,eif4e,cep290,klf4,ccnh,plk2,haus1,donson,app,taok1,ywhae,rpa2,ppm1d,tfdp1,cul4a,acvr1b,ccna1,cnot8,spdl1,dusp1,cnot2,e2f7,rint1,optn,cep41,sin3a,cyp1a1,tmod3,ticrr,brd4,cdkn2d,dnm2,aurkb,ccnd1,rfwd3,e2f4,pola2,cdt1,nasp,cdc20,gadd45a,cdkn2c,gfi1,cdc7,cdc73,mcm5,ep300,psmd6,ppp1cb,cenpf,dtl,zfp36l2,cul3,gigyf2,id2,klf11,e2f6,anapc15,cdc25a,cul2,itgb1,akap9,ctdp1,sox4,…	4.31959
169	5.11067e-05	GO:0007275	multicellular organism development	cyp26b1,eif2ak3,fgfr3,tacc3,fgfrl1,fgfbp1,wdr1,lyar,msx1,wfs1,ppargc1a,klf3,apbb2,kdr,hmgb2,cpe,rbm46,dchs2,hhip,pcdh18,mfsd8,plk4,spry1,kiaa1109,bbs7,sec24b,pitx2,neurog2,aimp1,tet2,slc9b2,cisd2,eif4e,grid2,snca,herc6,hmg20b,angptl4,mknk2,rab8a,ell,epha5,fras1,ugcg,ptbp3,cep290,cherp,klf2,hopx,tle2,aco1,sh3gl2,tmem38b,klf4,ift74,ptprd,dmrt1,gcnt1,tle1,ctsv,syk,pck2,lrp10,prmt5,chd8,znf219,smtn,t…	4.29152
170	5.11192e-05	GO:0045930	negative regulation of mitotic cell cycle	cnot7,klf4,chfr,plk2,donson,btg3,taok1,rpa2,tfdp1,cnot8,spdl1,dusp1,btg1,cnot2,e2f7,rint1,ticrr,tipin,cdkn2d,aurkb,ccnd1,rfwd3,e2f4,cdt1,cdc20,gadd45a,cdkn2c,cdc73,ep300,psmd6,cenpf,zfp36l2,heca,dlg1,gigyf2,wnt9a,anapc15,sox4,foxc1,ezh2,cul1,egfr,ctnnb1,pten,cdk1,prmt1,naa10,cdk5rap2,foxo4,fhl1,foxn3,bmp4,gpr132,psma3,prcc,e4f1,lcmt1,plk1,dcun1d3,ctdsp1,cdk5rap3,psmc5,brca1,e2f1,rbl1,usp47,psmd5,…	4.29142
171	5.20503e-05	GO:0007166	cell surface receptor signaling pathway	eif2ak3,tnip2,fgfr3,fgfrl1,moap1,htt,fgfbp1,msx1,htra3,ppargc1a,kdr,cnot7,acsl1,hmgb2,cpe,hhip,spry1,bbs7,camk2d,ube2d3,tspan5,grid2,snca,pias4,ptbp1,mknk2,csnk1g2,epha5,ncbp1,ugcg,myo9b,tle2,sh3gl2,klf4,ift74,ptprd,dmrt1,gnaq,tle4,tle1,syk,rnf31,chd8,crkl,mapk1,fzd10,scarb1,sh2b3,cmklr1,lmnb1,sema6a,zfyve16,lnpep,depdc1b,prlr,adamts12,onecut2,mbd2,smad2,rnf165,celf4,prdm15,brwd1,runx1,ifnar1,sod…	4.28358
172	5.29363e-05	GO:0032268	regulation of cellular protein metabolic process	avp,paip2b,eif2ak3,fgfr3,uvssa,ctbp1,htt,fbxl5,wfs1,ppargc1a,rell1,kdr,cnot7,acsl1,spry1,bbs7,camk2d,metap1,eif4e,snca,pias4,hmg20b,mex3d,ptbp1,mknk2,ncbp1,aco1,klf4,gnaq,syk,prmt5,tmem119,crkl,mapk1,chfr,fzd10,sh2b3,erp29,tesc,pebp1,tnfaip8,sema6a,enc1,ccnh,arrdc3,cast,rnf180,plk2,dhx29,nnt,paip1,prlr,ctif,celf4,prdm15,sod1,ltn1,app,usp25,taok1,casp1,map3k15,ywhae,rabgef1,timm17a,rps6ka1,lamtor5…	4.27625
173	5.57476e-05	GO:0043067	regulation of programmed cell death	avp,eif2ak3,tnip2,moap1,htt,msx1,wfs1,ppargc1a,apbb2,kdr,hmgb2,hhip,camk2d,grid2,snca,pias4,angptl4,klf4,tle1,syk,sptlc1,rabggta,chd8,tbx3,erp29,suds3,xbp1,tnfaip8,jmy,cast,plk2,nnt,prlr,golph3,acaa2,sod1,casp1,ywhae,mnt,arg2,rps6ka1,id3,sfpq,lamtor5,ptrh2,tfdp1,tpt1,pa2g4,erbb3,lrp1,foxo1,hmgb1,acer3,trim24,timp3,dusp1,msx2,egr1,hsp90b1,chst11,btg1,rassf3,frs2,pawr,gramd4,sin3a,adam10,pdia3,zfan…	4.25377
174	6.31138e-05	GO:0008219	cell death	avp,cyp26b1,chmp3,eif2ak3,tnip2,fgfr3,moap1,htt,msx1,wfs1,ppargc1a,apbb2,kdr,hmgb2,hhip,camk2d,aimp1,ube2d3,grid2,snca,pias4,angptl4,mknk2,klf4,rfk,tle1,ctsv,syk,sptlc1,rabggta,chd8,tbx3,crkl,mapk1,rilpl1,erp29,suds3,xbp1,tnfaip8,sema6a,jmy,cast,plk2,mrps30,nnt,prlr,golph3,acaa2,sod1,app,taok1,hic1,casp1,ywhae,mnt,arg2,rps6ka1,id3,sfpq,lamtor5,hipk1,atg3,ptrh2,tfdp1,cul4a,ing1,tpt1,acvr1b,pa2g4,e…	4.19988
175	6.72053e-05	GO:0045595	regulation of cell differentiation	cyp26b1,wdr1,msx1,kdr,hmgb2,kiaa1109,slc9b2,eif4e,grid2,hmg20b,lpl,ptbp1,jund,ptbp3,hopx,klf4,ptprd,ctsv,syk,prmt5,znf219,tmem119,tbx3,man2a1,crkl,mapk1,cmklr1,tesc,xbp1,sema6a,enc1,nr2f1,plk2,adamts12,nedd4l,mex3c,smad2,runx1,olig2,sod1,app,chodl,flot2,plxna2,rps6ka1,id3,sox13,rab7b,rap1a,macf1,syap1,lims1,cul4a,tnfsf11,acvr1b,kmt2d,wdr61,pa2g4,lrp1,wdfy2,foxo1,hmgb1,atp8a2,fgf9,tenm4,maml1,jade…	4.1726
176	7.17889e-05	GO:0012501	programmed cell death	avp,cyp26b1,chmp3,eif2ak3,tnip2,fgfr3,moap1,htt,msx1,wfs1,ppargc1a,apbb2,kdr,hmgb2,hhip,camk2d,aimp1,ube2d3,grid2,snca,pias4,angptl4,mknk2,klf4,rfk,tle1,ctsv,syk,sptlc1,rabggta,chd8,tbx3,crkl,mapk1,erp29,suds3,xbp1,tnfaip8,sema6a,jmy,cast,plk2,mrps30,nnt,prlr,golph3,acaa2,sod1,app,taok1,hic1,casp1,ywhae,mnt,arg2,rps6ka1,id3,sfpq,lamtor5,hipk1,atg3,ptrh2,tfdp1,cul4a,tpt1,acvr1b,pa2g4,erbb3,lrp1,kr…	4.14394
177	7.22819e-05	GO:0032502	developmental process	cyp26b1,eif2ak3,fgfr3,tacc3,nkx1-1,ctbp1,fgfrl1,fgfbp1,wdr1,lyar,msx1,wfs1,ppargc1a,klf3,apbb2,kdr,hmgb2,cpe,rbm46,dchs2,hhip,pcdh18,mfsd8,plk4,spry1,kiaa1109,bbs7,sec24b,pitx2,neurog2,aimp1,tet2,slc9b2,cisd2,eif4e,grid2,snca,herc6,hmg20b,lpl,ptbp1,angptl4,rfx2,mknk2,jund,rab8a,ell,epha5,fras1,ugcg,ptbp3,cep290,cherp,klf2,hopx,tle2,aco1,sh3gl2,tmem38b,klf4,ift74,ptprd,dmrt1,gcnt1,tle1,ctsv,syk,pc…	4.14097
178	7.80201e-05	GO:0070848	response to growth factor	fgfr3,fgfrl1,fgfbp1,msx1,htra3,ppargc1a,kdr,hhip,spry1,ube2d3,snca,ptbp1,ncbp1,sh3gl2,klf4,crkl,mapk1,sema6a,zfyve16,adamts12,onecut2,smad2,rnf165,app,nlk,trim33,cask,rap1a,syap1,lims1,acvr1b,cd63,smad9,fgf9,pdgfd,hnrnph1,spry4,msx2,egr1,chst11,frs2,usp8,pde8a,furin,pcsk6,znf703,smad6,fgfr1,adam9,dnm2,ier2,fgf4,glg1,bcar1,zfhx3,jun,gclm,ep300,micall1,rhoa,twf2,tgfb2,zfp36l2,fermt1,nus1,hdac2,sox2…	4.10779
179	7.9534e-05	GO:0009653	anatomical structure morphogenesis	cyp26b1,eif2ak3,fgfr3,fgfrl1,fgfbp1,wdr1,msx1,ppargc1a,apbb2,kdr,cpe,rbm46,hhip,spry1,bbs7,sec24b,pitx2,aimp1,grid2,angptl4,rfx2,rab8a,epha5,fras1,ptbp3,cep290,klf2,hopx,tle2,sh3gl2,klf4,ptprd,dmrt1,gcnt1,tle1,syk,znf219,tmem119,tbx3,man2a1,crkl,mapk1,ulk1,rilpl1,rhof,xbp1,lztr1,sema6a,col4a3bp,plk2,adamts12,nedd4l,atp8b1,onecut2,smad2,rnf165,ptgfrn,ripk4,brwd1,ets2,runx1,sod1,app,chodl,pitpna,if…	4.09945
180	7.98549e-05	GO:0071363	cellular response to growth factor stimulus	fgfr3,fgfrl1,fgfbp1,msx1,htra3,ppargc1a,kdr,hhip,spry1,ube2d3,snca,ptbp1,ncbp1,sh3gl2,klf4,crkl,mapk1,sema6a,zfyve16,adamts12,onecut2,smad2,rnf165,app,nlk,trim33,cask,rap1a,syap1,lims1,acvr1b,cd63,smad9,fgf9,pdgfd,hnrnph1,spry4,msx2,egr1,chst11,frs2,usp8,pde8a,furin,pcsk6,znf703,smad6,fgfr1,adam9,dnm2,fgf4,glg1,bcar1,jun,gclm,ep300,micall1,rhoa,twf2,tgfb2,zfp36l2,fermt1,nus1,hdac2,skil,sox11,kidi…	4.0977
181	0.000104596	GO:0044770	cell cycle phase transition	tacc3,slbp,cep135,cnot7,plrg1,plk4,eif4e,cep290,klf4,ccnh,plk2,haus1,donson,app,taok1,ywhae,rpa2,ppm1d,tfdp1,cul4a,acvr1b,ccna1,cnot8,spdl1,dusp1,cnot2,e2f7,rint1,optn,cep41,sin3a,cyp1a1,tmod3,ticrr,tipin,brd4,akap8l,cdkn2d,dnm2,aurkb,ccnd1,rfwd3,e2f4,pola2,cdt1,nasp,cdc20,gadd45a,cdkn2c,gfi1,cdc7,cdc73,mcm5,ep300,psmd6,ppp1cb,cenpf,dtl,zfp36l2,cul3,gigyf2,id2,klf11,e2f6,anapc15,cdc25a,cul2,itgb1…	3.98049
182	0.000109663	GO:0007417	central nervous system development	tacc3,wdr1,msx1,ppargc1a,pcdh18,bbs7,sec24b,pitx2,grid2,epha5,cep290,sh3gl2,prmt5,chd8,tbx3,crkl,mapk1,suds3,bace2,psmg1,olig2,app,atp5j,ctns,ywhae,plxna2,arid1a,id3,grhl3,acvr1b,lrp1,fgf9,acat1,eed,tenm4,kdm7a,tulp3,nmur2,pitx1,drd1,frs2,slc38a2,rora,csk,nr2f2,fgfr1,dnajb1,ldlr,dock7,chst8,fa2h,csnk2a2,cbln1,phlpp2,zfhx3,cdh1,wls,dmrta2,cdkn2c,xrcc6,dag1,rhoa,sema3f,cenpf,rtn4,btbd3,otx1,gnpat,i…	3.95994
183	0.000127634	GO:0007093	mitotic cell cycle checkpoint	cnot7,chfr,plk2,donson,taok1,rpa2,tfdp1,cnot8,spdl1,dusp1,cnot2,e2f7,rint1,ticrr,tipin,aurkb,ccnd1,rfwd3,e2f4,cdt1,cdc20,gadd45a,ep300,cenpf,dlg1,gigyf2,wnt9a,anapc15,sox4,cdk1,prmt1,cdk5rap2,foxo4,foxn3,prcc,lcmt1,plk1,cdk5rap3,brca1,e2f1,znf830,e2f8,tp53,ints3	3.89403
184	0.000128686	GO:0009896	positive regulation of catabolic process	htt,fbxl5,kdr,cnot7,bbs7,snca,mex3d,oaz1,sptlc1,chfr,ulk1,rnf180,plk2,nnt,nedd4l,app,gpsm1,rnf19b,rnft1,lrp1,pip4k2c,gpd1,foxo1,hmgb1,sesn3,cnot8,csnk1a1,optn,snx33,snx1,furin,adam9,keap1,ldlr,pacsin3,stx5,herpud1,gga1,prkcd,pfkfb4,nprl2,rab3gap2,dtl,zfp36l2,socs5,sesn1,tiparp,irs1,gigyf2,atg16l1,rnf144a,trib2,wac,rnf144b,rbm24,mylip,wwp1,rnf19a,trib1,ago2,pten,cpeb3,trim8,sirt1,park7,gsk3a,ikbkg…	3.89047
185	0.000142369	GO:0006796	phosphate-containing compound metabolic process	avp,eif2ak3,tnip2,fgfr3,uvssa,ctbp1,htt,ppargc1a,pgm2,rell1,kdr,cnot7,acsl1,dctd,ndufc1,plk4,spry1,etnppl,camk2d,snca,lpl,ptbp1,mknk2,csnk1g2,isyna1,ell,epha5,gne,tmem38b,klf4,ptprd,rfk,gnaq,syk,sptlc1,pck2,prmt5,lpcat4,mtmr3,tmem119,git2,limk2,crkl,slc25a1,mapk1,ulk1,ran,fzd10,scarb1,sh2b3,erp29,tesc,pebp1,hsd17b4,sema6a,col4a3bp,mccc2,acot12,ccnh,plk2,nnt,ptger4,nadk2,prlr,mtmr12,baat,mapk4,lip…	3.84658
186	0.000151235	GO:1901700	response to oxygen-containing compound	avp,cyp26b1,rab11fip5,tnip2,ppargc1a,klf3,acsl1,hmgb2,slc9b2,adh5,eif4e,snca,lpl,jund,rab8a,epha5,klf2,klf4,klf9,gcnt1,gna14,gnaq,ctsv,pck2,prmt5,crkl,mapk1,fzd10,scarb1,ncor2,tesc,xbp1,ptger4,prlr,fech,mbd2,smad2,brwd1,ifnar1,sod1,app,nrip1,pdk3,casp1,id3,lamtor5,rap1a,syap1,ipo5,lrp1,sp1,krt8,smarcd1,gpd1,foxo1,hmgb1,pdgfd,sesn3,panx1,p2ry2,chrm2,trim24,hnrnpa0,dusp1,drd1,msx2,atp6v0e1,egr1,hsp…	3.82035
187	0.00015249	GO:0009628	response to abiotic stimulus	avp,rab11fip5,eif2ak3,letm1,uvssa,htt,ppargc1a,camk2d,metap1,lpl,angptl4,jund,psip1,gnaq,mapk1,slc12a2,ptger4,fech,mbd2,acaa2,rcsd1,sod1,app,ctns,pdk3,casp1,ywhae,ift20,rpa2,atp1b1,ppm1d,ptges3,aaas,krt8,foxo1,atp8a2,chordc1,nup205,rhno1,irf1,dusp1,drd1,egr1,hsp90b1,slc38a2,brd1,nampt,suv39h2,rora,cyp1a1,ticrr,nup133,tacr1,tipin,tnfrsf10b,dnajb1,cdkn2d,dnm2,aurkb,fis1,adm,cry2,ccnd1,ddb2,hspa1l,f…	3.81676
188	0.000162651	GO:0006468	protein phosphorylation	avp,eif2ak3,tnip2,fgfr3,uvssa,ctbp1,htt,ppargc1a,rell1,kdr,cnot7,acsl1,plk4,spry1,camk2d,snca,mknk2,csnk1g2,epha5,klf4,gnaq,syk,prmt5,tmem119,limk2,crkl,mapk1,ulk1,fzd10,sh2b3,erp29,tesc,pebp1,sema6a,ccnh,plk2,nnt,ptger4,prlr,mapk4,smad2,prdm15,ripk4,morc3,sod1,app,taok1,pdk3,baz1b,map3k15,ywhae,nlk,rabgef1,pdik1l,rps6ka1,hipk1,cask,rap1a,ppm1d,syap1,cblb,ipo5,kbtbd7,tnfsf11,acvr1b,erbb3,lrp1,wdf…	3.78874
189	0.00017659	GO:0044085	cellular component biogenesis	chmp3,eif2ak3,letm1,fgfrl1,htt,wdr1,lyar,stx18,ppargc1a,kdr,cep135,cnot7,hmgb2,fhdc1,smarca5,ndufc1,plk4,bbs7,sec24b,camk2d,synpo2,grid2,snca,g3bp2,angptl4,rfx2,lsm4,rab8a,ncbp1,ugcg,cep290,polr1e,hopx,ncln,tle2,sh3gl2,ift74,psip1,ptprd,tle4,tle1,syk,rabggta,prmt5,mtmr3,c5orf30,crkl,ulk1,ran,rilpl1,vps37b,clip1,rhof,jmy,tnpo1,mccc2,ocln,marveld2,ccnh,cetn3,plk2,ptger4,prlr,brix1,c1qtnf3,golph3,lm…	3.75303
190	0.00017848	GO:0048568	embryonic organ development	msx1,kdr,plk4,bbs7,sec24b,cep290,tbx3,mapk1,sh2b3,mbd2,smad2,sod1,arid1a,id3,grhl3,hipk1,krt8,atp8a2,fgf9,myo7a,tulp3,chst11,frs2,e2f7,lrig3,nr2f2,fgfr1,adm,tgfb2,six2,epas1,otx1,dlg1,hs6st1,sox11,id2,wnt9a,wnt3a,insig1,en2,dnajb6,wdr60,zeb1,foxc1,egfr,ctnnb1,eomes,tfap2a,edn1,hey1,osr2,stk3,grhl2,zfat,pcdh15,fgfr2,med12,ppp1r13l,slc44a4,spint2,bmp4,hif1a,six4,arnt,vangl2,rnf112,pkd1,dlx2,ihh,stk…	3.74841
191	0.0001938	GO:0010638	positive regulation of organelle organization	ctbp1,moap1,htt,wdr1,stx18,msx1,ppargc1a,kdr,cep135,plk4,synpo2,ube2d3,g3bp2,dmrt1,rnf31,mapk1,ulk1,clip1,jmy,lman1,cct8,ywhae,sfpq,rhoc,cct6a,tfdp1,wdr61,pip4k2c,eed,g3bp1,msx2,cct2,cnot2,wasl,pot1,optn,sin3a,anxa2,rhobtb2,brd4,akap8l,dnmt1,aurkb,fis1,hspa1l,fen1,csnk2a2,cdc42ep2,cfl1,arl2,lrp5,cdt1,leprot,srebf2,baiap2l2,pla2g6,rhoa,poc1a,arpc4,lmod3,rab3gap2,ppp3r1,myb,dlg1,tp63,cul3,ywhaq,sdc…	3.71265
192	0.000193833	GO:0010564	regulation of cell cycle process	chmp3,tacc3,msx1,cep135,cnot7,plrg1,plk4,cep290,klf4,dmrt1,prmt5,plk2,rxfp3,haus1,donson,app,chmp2b,taok1,ywhae,rpa2,sfpq,rbbp4,tfdp1,cul4a,racgap1,chordc1,eed,rhno1,cnot8,spdl1,dusp1,msx2,cnot2,e2f7,rint1,gnai1,cep41,sin3a,cyp1a1,tmod3,prc1,ticrr,tipin,fgfr1,brd4,cdkn2d,calr,aurkb,ccnd1,incenp,fen1,rfwd3,csnk2a2,e2f4,lrp5,cdt1,cdc20,gadd45a,cdkn2c,cdc7,cdc73,ep300,rhoa,poc1a,psmd6,sde2,cenpf,dtl…	3.71257
193	0.00019432	GO:0061024	membrane organization	avp,chmp3,letm1,moap1,stx18,atp8a1,sec24b,snca,atp8b3,rab8a,ugcg,cplx1,sh3gl2,ptprd,gltp,crkl,rilpl1,clip1,col4a3bp,snx18,golph3,lman1,atp8b1,acaa2,wrb,sod1,atp5j,chmp2b,gosr1,flot2,ywhae,rab7b,atp1b1,tmem30b,ldlrap1,ankfy1,tfdp1,atp8a2,chrm2,parp11,ppp2ca,hbegf,hspa4,wasl,chchd3,snx33,anxa2,ppia,vamp8,aak1,spg11,rhobtb2,vps41,akap8l,dnm2,ldlr,calr,trappc1,aurkb,pacsin3,ppp6r3,fa2h,ap2a2,stx5,spg…	3.71148
194	0.000196745	GO:0051276	chromosome organization	tacc3,ctbp1,ppargc1a,ncapg,pds5a,hmgb2,smarca5,camk2d,tet2,snca,hmg20b,mau2,prmt5,chd8,dcp2,mapk1,ran,setd1b,rfc5,suds3,msh3,chd1,mier3,mbd2,brwd1,mis18a,cct8,chmp2b,baz1b,arid1a,rpa2,sfpq,rlf,rbbp4,ppm1d,rad51d,cct6a,mis12,cul4a,ing1,kansl2,kmt2d,wdr61,ptges3,racgap1,smarcd1,rcbtb1,rfc3,hmgb1,eed,kdm7a,g3bp1,jade2,spdl1,dusp1,drd1,cct2,pot1,brd1,suv39h2,sin3a,prc1,h2afv,kat6a,brd4,akap8l,dnmt1,s…	3.7061
195	0.000204397	GO:0051099	positive regulation of binding	hmgb2,ncbp1,mau2,klf4,ran,plk2,mbd2,app,epb41,gpsm1,syap1,lrp1,hmgb1,ppp2ca,anxa2,traf6,aktip,cdt1,cebpg,ep300,eif3d,plxnd1,nvl,epha4,wnt3a,nrp1,bambi,foxc1,ctnnb1,plcl2,stk3,eif3e,park7,ski,edf1,fam129b,taf1,fmr1,bmp4,lgals3,pkd1,stk4,rara,traf2,ralb,derl1	3.68953
196	0.000205605	GO:0006793	phosphorus metabolic process	avp,eif2ak3,tnip2,fgfr3,uvssa,ctbp1,htt,ppargc1a,pgm2,rell1,kdr,cnot7,acsl1,dctd,ndufc1,plk4,spry1,etnppl,camk2d,snca,lpl,ptbp1,mknk2,csnk1g2,isyna1,ell,epha5,gne,tmem38b,klf4,ptprd,rfk,gnaq,syk,sptlc1,pck2,prmt5,lpcat4,mtmr3,tmem119,git2,limk2,crkl,slc25a1,mapk1,ulk1,ran,fzd10,scarb1,sh2b3,erp29,tesc,pebp1,hsd17b4,sema6a,col4a3bp,mccc2,acot12,ccnh,plk2,nnt,ptger4,nadk2,prlr,mtmr12,baat,mapk4,lip…	3.68697
197	0.000206883	GO:0009888	tissue development	cyp26b1,eif2ak3,fgfr3,wdr1,msx1,ppargc1a,kdr,hhip,plk4,spry1,kiaa1109,bbs7,sec24b,pitx2,hmg20b,fras1,ugcg,cep290,klf2,tmem38b,klf4,ift74,dmrt1,gcnt1,ctsv,pck2,znf219,tmem119,tbx3,mapk1,rilpl1,xbp1,hsd17b4,sema6a,marveld2,arrdc3,adamts12,onecut2,mex3c,smad2,ptgfrn,upk1b,ripk4,ets2,runx1,sod1,cxadr,flot2,aldoc,ift20,plxna2,arg2,arid1a,id3,grhl3,elf3,gpr161,rap1a,rhoc,tfdp1,gpc6,tnfsf11,acvr1b,erbb3…	3.68428
198	0.000230723	GO:0045786	negative regulation of cell cycle	apbb2,cnot7,nudt6,klf4,dmrt1,chfr,jmy,plk2,donson,btg3,taok1,tbrg1,rpa2,lamtor5,rbbp4,tfdp1,cul4a,ipo5,eed,rhno1,cnot8,spdl1,irf1,dusp1,btg1,cnot2,e2f7,mapk12,rint1,ticrr,nr2f2,tipin,notch2,cdkn2d,calr,aurkb,rnf167,ccnd1,rfwd3,e2f4,cdt1,zfhx3,cdc20,gadd45a,cdkn2c,dhcr24,cdc7,cdc73,ep300,atrip,psmd6,sde2,tgfb2,cenpf,dtl,zfp36l2,msh6,heca,sox2,dlg1,skil,gigyf2,sox11,id2,e2f6,cdc5l,wnt9a,anapc15,wac…	3.63691
199	0.000238196	GO:0032870	cellular response to hormone stimulus	uvssa,ppargc1a,acsl1,pgrmc2,eif4e,lpl,jund,rab8a,epha5,ugcg,klf9,gnaq,pck2,crkl,ran,ncor2,xbp1,nr2f1,ptger4,prlr,fech,brwd1,runx1,nrip1,arid1a,syap1,kmt2d,ptges3,sp1,foxo1,sesn3,chrm2,dusp1,msx2,atp6v0e1,rap1b,cnot2,rora,csk,usp8,nr2f2,znf703,smarca4,calr,cry2,wt1,lgr4,esrra,bcar1,cyba,jun,leprot,atp6v0b,gclm,ep300,prkcd,rhoa,nr2c2,prkar2a,zfp36l2,fshr,esr1,arid1b,tp63,prkci,irs1,lpin1,apob,cdc5l…	3.62307
200	0.000257311	GO:1901991	negative regulation of mitotic cell cycle phase transition	cnot7,klf4,plk2,donson,taok1,rpa2,tfdp1,cnot8,spdl1,dusp1,cnot2,e2f7,rint1,ticrr,cdkn2d,aurkb,ccnd1,rfwd3,e2f4,cdt1,cdc20,gadd45a,cdkn2c,cdc73,ep300,psmd6,cenpf,zfp36l2,gigyf2,anapc15,sox4,ezh2,cul1,pten,cdk1,prmt1,cdk5rap2,foxo4,fhl1,foxn3,gpr132,psma3,lcmt1,plk1,dcun1d3,ctdsp1,cdk5rap3,psmc5,brca1,e2f1,rbl1,usp47,psmd5,znf830,e2f8,psmd3,tp53	3.58954
201	0.000260633	GO:0031331	positive regulation of cellular catabolic process	htt,fbxl5,kdr,cnot7,bbs7,snca,mex3d,sptlc1,chfr,ulk1,rnf180,plk2,nnt,app,gpsm1,rnf19b,rnft1,lrp1,pip4k2c,gpd1,foxo1,hmgb1,sesn3,cnot8,csnk1a1,optn,snx33,furin,adam9,keap1,ldlr,pacsin3,herpud1,prkcd,pfkfb4,nprl2,rab3gap2,zfp36l2,socs5,sesn1,irs1,gigyf2,atg16l1,rnf144a,trib2,wac,rnf144b,rbm24,rnf19a,trib1,ago2,pten,cpeb3,trim8,sirt1,park7,gsk3a,ikbkg,taf1,fmr1,sptlc2,hif1a,arnt,phkg2,plk1,zfand2a,n…	3.58397
202	0.00026397	GO:0060322	head development	tacc3,msx1,ppargc1a,pcdh18,bbs7,sec24b,pitx2,grid2,epha5,cep290,chd8,tbx3,limk2,crkl,mapk1,suds3,psmg1,olig2,app,atp5j,ctns,ywhae,plxna2,arid1a,lrp1,fgf9,acat1,kdm7a,tulp3,pitx1,drd1,frs2,slc38a2,rora,csk,nr2f2,fgfr1,dnajb1,dock7,csnk2a2,cbln1,phlpp2,zfhx3,cdh1,wls,dmrta2,xrcc6,ep300,rhoa,cenpf,rtn4,btbd3,otx1,gnpat,pou3f2,sox2,b3gnt5,tiparp,fbxo45,ryk,id2,ywhaq,wnt3a,csrnp1,en2,nrp1,itgb1,kif5b,…	3.57845
203	0.000268052	GO:0000082	G1/S transition of mitotic cell cycle	cnot7,plrg1,eif4e,klf4,ccnh,plk2,rpa2,tfdp1,cul4a,acvr1b,ccna1,cnot8,cnot2,e2f7,cyp1a1,brd4,cdkn2d,ccnd1,rfwd3,e2f4,pola2,cdt1,nasp,gadd45a,cdkn2c,gfi1,cdc7,cdc73,mcm5,ep300,cul3,gigyf2,id2,klf11,e2f6,cdc25a,cul2,itgb1,sox4,id4,ezh2,cul1,egfr,mcm3,orc5,pten,cdk1,camk2g,prmt1,cul4b,fhl1,gpr132,ino80,max,pkd1,dcun1d3,ctdsp1,e2f1,rbl1,e2f8,tp53	3.57178
204	0.000276515	GO:0010941	regulation of cell death	avp,eif2ak3,tnip2,moap1,htt,msx1,wfs1,ppargc1a,apbb2,kdr,hmgb2,hhip,camk2d,grid2,snca,pias4,angptl4,klf4,tle1,syk,sptlc1,rabggta,chd8,tbx3,rilpl1,erp29,suds3,xbp1,tnfaip8,jmy,cast,plk2,nnt,prlr,golph3,acaa2,sod1,casp1,ywhae,mnt,arg2,rps6ka1,id3,sfpq,lamtor5,ptrh2,tfdp1,ing1,tpt1,pa2g4,erbb3,lrp1,foxo1,hmgb1,acer3,trim24,timp3,dusp1,msx2,egr1,hsp90b1,chst11,btg1,rassf3,frs2,pawr,gpr37,gramd4,sin3a…	3.55828
205	0.000321575	GO:0030154	cell differentiation	cyp26b1,eif2ak3,fgfr3,nkx1-1,ctbp1,wdr1,lyar,msx1,ppargc1a,apbb2,kdr,hmgb2,rbm46,hhip,mfsd8,plk4,spry1,kiaa1109,bbs7,sec24b,pitx2,neurog2,tet2,slc9b2,eif4e,grid2,herc6,hmg20b,lpl,ptbp1,rfx2,jund,rab8a,epha5,ugcg,ptbp3,cep290,klf2,hopx,sh3gl2,tmem38b,klf4,ift74,ptprd,dmrt1,ctsv,syk,pck2,prmt5,znf219,tmem119,tbx3,man2a1,crkl,mapk1,ulk1,fzd10,rilpl1,sh2b3,cmklr1,tesc,xbp1,hsd17b4,sema6a,enc1,marveld…	3.49272
206	0.000352967	GO:0016032	viral process	chmp3,ctbp1,kdr,exoc1,cnot7,eif4e,g3bp2,ptbp1,psip1,syk,mapk1,ran,scarb1,vps37b,tnpo1,chd1,nedd4l,rpl17,morc3,chmp2b,cxadr,vps37d,ywhae,wasf2,lamtor5,rps10,kpna6,rpl23a,cul4a,ipo5,rps26,sp1,aaas,krt8,nup205,vdac1,g3bp1,rpl18a,anxa2,crtc3,furin,ppia,vamp8,nup133,ikbkb,brd4,c19orf66,keap1,ilf3,smarca4,ldlr,lgals9,ap2a2,cfl1,kars,kdm4a,jun,eps15,xpr1,gfi1,prmt6,xrcc6,ep300,eif3d,dag1,rhoa,rbm15b,msh…	3.45227
207	0.000364327	GO:0043066	negative regulation of apoptotic process	avp,tnip2,htt,msx1,wfs1,ppargc1a,apbb2,kdr,hmgb2,hhip,snca,angptl4,klf4,tle1,chd8,tbx3,xbp1,tnfaip8,cast,plk2,nnt,prlr,golph3,acaa2,sod1,ywhae,mnt,arg2,rps6ka1,lamtor5,ptrh2,tpt1,pa2g4,erbb3,lrp1,foxo1,dusp1,msx2,hsp90b1,chst11,sin3a,zfand6,smad6,tnfrsf10b,ikbkb,grk5,notch2,dnmt1,cdkn2d,aurkb,api5,traf6,fgf4,hipk3,wt1,csnk2a2,syvn1,cfl1,tox3,herpud1,cth,jun,dhcr24,gclm,cdc73,prkcd,rhoa,pim1,mitf,…	3.43851
208	0.000380389	GO:0044403	symbiotic process	chmp3,ctbp1,kdr,exoc1,cnot7,eif4e,g3bp2,ptbp1,psip1,syk,mapk1,ulk1,ran,scarb1,vps37b,tnpo1,chd1,nedd4l,rpl17,morc3,chmp2b,cxadr,vps37d,ywhae,wasf2,lamtor5,rps10,kpna6,rpl23a,rab9a,cul4a,ipo5,sugt1,rps26,sp1,aaas,krt8,nup205,vdac1,g3bp1,slc22a5,rpl18a,anxa2,crtc3,furin,ppia,vamp8,nup133,ikbkb,brd4,c19orf66,keap1,ilf3,smarca4,ldlr,lgals9,ap2a2,cfl1,cdh1,kars,kdm4a,jun,eps15,xpr1,gfi1,prmt6,xrcc6,ep…	3.41977
209	0.000387625	GO:0045597	positive regulation of cell differentiation	cyp26b1,kdr,hmgb2,slc9b2,hmg20b,lpl,jund,ptprd,syk,prmt5,znf219,tmem119,man2a1,crkl,cmklr1,tesc,xbp1,sema6a,enc1,nedd4l,smad2,runx1,olig2,app,chodl,plxna2,rps6ka1,rab7b,rap1a,macf1,syap1,lims1,tnfsf11,acvr1b,pa2g4,lrp1,wdfy2,hmgb1,atp8a2,tenm4,maml1,jade2,msx2,dpysl3,btg1,mapk12,sema3c,anxa2,znf609,mef2a,ddx56,znf703,fgfr1,dnm2,calr,lgals9,adm,traf6,mark2,lrp5,irx3,cth,jun,dmrta2,ep300,dag1,rhoa,…	3.41159
210	0.000429012	GO:0060341	regulation of cellular localization	rab11fip5,chmp3,eif2ak3,htt,stx18,sec24b,camk2d,slc9b2,ube2d3,snca,oaz1,epha5,cep290,cplx1,tmem38b,abhd17b,syk,rnf31,cabp1,crkl,mapk1,ran,lman1,cplx4,nedd4l,cct8,gosr1,tax1bp3,ywhae,rabgef1,epb41,cask,rap1a,tmem30b,ldlrap1,cct6a,tfdp1,fgf14,ubac2,ipo5,gpc6,lrp1,aaas,chrm2,diaph1,rbm27,drd1,rap1b,cct2,rint1,gnai1,snx33,sin3a,anxa2,csk,adam10,abhd17c,vamp8,akap8l,lgals9,fis1,ppfia1,hspa1l,csnk2a2,l…	3.36753
211	0.000436157	GO:0048856	anatomical structure development	cyp26b1,eif2ak3,fgfr3,tacc3,fgfrl1,fgfbp1,wdr1,lyar,msx1,wfs1,ppargc1a,klf3,apbb2,kdr,hmgb2,cpe,rbm46,dchs2,hhip,pcdh18,mfsd8,plk4,spry1,kiaa1109,bbs7,sec24b,pitx2,neurog2,aimp1,tet2,slc9b2,cisd2,eif4e,grid2,snca,herc6,hmg20b,ptbp1,angptl4,rfx2,mknk2,jund,rab8a,ell,epha5,fras1,ugcg,ptbp3,cep290,cherp,klf2,hopx,tle2,aco1,sh3gl2,tmem38b,klf4,ift74,ptprd,dmrt1,gcnt1,tle1,ctsv,syk,pck2,lrp10,prmt5,ch…	3.36036
212	0.00054207	GO:0080135	regulation of cellular response to stress	eif2ak3,letm1,msx1,wfs1,rell1,camk2d,pias4,klf4,syk,mapk1,fzd10,erp29,xbp1,plk2,sod1,app,usp25,taok1,hic1,ywhae,arg2,rpa2,sfpq,rnft1,cul4a,ubac2,tnfsf11,tpt1,ptges3,lrp1,aaas,foxo1,hmgb1,tnfrsf19,chordc1,nup205,dusp1,pawr,gpr37,nampt,rint1,pde8a,dbnl,nup133,dnajb1,cdkn2d,traf6,hipk3,hspa1l,rfwd3,syvn1,herpud1,kars,ptprf,gadd45a,ier5,cebpg,ep300,prkcd,manf,arl6ip5,aida,tgfb2,dlg1,pdcd10,skil,epha4…	3.26594
213	0.000545515	GO:0050821	protein stabilization	tnip2,msx1,wfs1,ppargc1a,ncln,gnaq,tesc,ccnh,morc3,cct8,flot2,zswim7,nlk,tbrg1,atp1b1,cct6a,sugt1,cog3,ptges3,cct2,aak1,calr,trim44,syvn1,ep300,prkcd,pim1,rtn4,pdcd10,epha4,sox4,stk3,pten,park7,per3,taf1,sav1,telo2,rpl23,stk4,grn,mtmr9,tp53,pex6	3.26319
214	0.000555136	GO:0042592	homeostatic process	avp,cyp26b1,rab11fip5,letm1,htt,fbxl5,lyar,wfs1,ppargc1a,slc30a9,kdr,acsl1,hmgb2,camk2d,slc9b2,snca,abcg2,lpl,angptl4,epha5,ugcg,ptbp3,cherp,klf2,aco1,tmem38b,ttc39b,syk,pck2,slc7a8,tmem119,dcp2,mapk1,scarb1,sh2b3,cmklr1,rfc5,xbp1,slc12a2,col4a3bp,atp6ap1l,arrdc3,lnpep,nnt,ptger4,prlr,c1qtnf3,nedd4l,mex3c,lipg,bace2,sod1,cct8,tmem97,app,chmp2b,cxadr,taok1,pdk3,ywhae,rpa2,grhl3,atp1b1,rap1a,qsox2,…	3.2556
215	0.000587292	GO:0000075	cell cycle checkpoint	cnot7,chfr,plk2,donson,taok1,rpa2,tfdp1,cul4a,rhno1,cnot8,spdl1,dusp1,cnot2,e2f7,rint1,ticrr,tipin,aurkb,ccnd1,rfwd3,e2f4,cdt1,cdc20,gadd45a,ep300,atrip,cenpf,dtl,dlg1,gigyf2,sox11,cdc5l,wnt9a,anapc15,wac,sox4,cdk1,prmt1,cdk5rap2,foxo4,foxn3,prcc,lcmt1,plk1,cdk5rap3,brca1,e2f1,znf830,e2f8,tp53,ints3	3.23115
216	0.000613099	GO:0001892	embryonic placenta development	plk4,mapk1,krt8,e2f7,nr2f2,adm,epas1,hs6st1,dnajb6,egfr,eomes,hey1,stk3,grhl2,zfat,fgfr2,spint2,hif1a,arnt,pkd1,stk4,plcd3,snai1,grb2,junb,bptf,e2f8,rbpj	3.21247
217	0.000638424	GO:0042176	regulation of protein catabolic process	fbxl5,bbs7,snca,oaz1,chfr,rnf180,plk2,nedd4l,usp25,rnf19b,rnft1,ubac2,lrp1,foxo1,timp3,csnk1a1,snx33,anxa2,snx1,usp8,furin,adam9,keap1,ldlr,pacsin3,csnk2a2,stx5,herpud1,cdh1,banp,gga1,tmf1,dtl,socs5,snx3,tiparp,epha4,rnf144a,odc1,trib2,pbk,wac,cyp51a1,rnf144b,mylip,egfr,sdcbp,wwp1,rnf19a,azin1,trib1,pten,park7,plekhg5,gsk3a,trim32,ogt,taf1,cul4b,fmr1,ubqln4,pkd1,plk1,zfand2a,nfe2l2,lrp2,dnajb2,rp…	3.19489
218	0.00064316	GO:0016310	phosphorylation	avp,eif2ak3,tnip2,fgfr3,uvssa,ctbp1,htt,ppargc1a,rell1,kdr,cnot7,acsl1,ndufc1,plk4,spry1,camk2d,snca,mknk2,csnk1g2,epha5,gne,klf4,rfk,gnaq,syk,pck2,prmt5,tmem119,git2,limk2,crkl,mapk1,ulk1,fzd10,sh2b3,erp29,tesc,pebp1,sema6a,col4a3bp,ccnh,plk2,nnt,ptger4,nadk2,prlr,mapk4,smad2,prdm15,ripk4,morc3,sod1,app,atp5j,taok1,aldoc,pdk3,baz1b,map3k15,ywhae,nlk,rabgef1,pdik1l,cnksr1,rps6ka1,hipk1,cask,rap1a…	3.19168
219	0.000691896	GO:0051716	cellular response to stimulus	avp,cyp26b1,rab11fip5,eif2ak3,tnip2,letm1,fgfr3,uvssa,fgfrl1,moap1,htt,fgfbp1,msx1,wfs1,htra3,ppargc1a,rell1,klf3,pds5a,apbb2,slc30a9,kdr,exoc1,cnot7,mtnr1a,acsl1,neil3,hmgb2,cpe,hhip,smarca5,pgrmc2,spry1,bbs7,camk2d,aimp1,arhgef38,slc9b2,ube2d3,adh5,metap1,eif4e,tspan5,grid2,snca,abcg2,g3bp2,pias4,lpl,gng7,kiss1r,ptbp1,rfx2,mknk2,csnk1g2,jund,rab8a,epha5,ncbp1,dnajc25,ugcg,myo9b,cherp,klf2,ncln,…	3.15996
220	0.000703844	GO:0022607	cellular component assembly	chmp3,eif2ak3,letm1,fgfrl1,htt,wdr1,stx18,ppargc1a,kdr,cep135,cnot7,hmgb2,fhdc1,smarca5,ndufc1,plk4,bbs7,sec24b,camk2d,synpo2,grid2,snca,g3bp2,angptl4,rfx2,lsm4,rab8a,ncbp1,ugcg,cep290,polr1e,hopx,ncln,tle2,sh3gl2,ift74,psip1,ptprd,tle4,tle1,syk,rabggta,prmt5,mtmr3,c5orf30,crkl,ulk1,rilpl1,vps37b,clip1,rhof,jmy,tnpo1,mccc2,ocln,marveld2,ccnh,cetn3,plk2,ptger4,prlr,brix1,c1qtnf3,golph3,lman1,atp8b…	3.15252
221	0.000778399	GO:0072594	establishment of protein localization to organelle	moap1,spcs3,ube2d3,timm44,tomm5,srp72,syk,rnf31,cabp1,mapk1,ran,vps37b,hsd17b4,tnpo1,zfyve16,amacr,lman1,baat,rpl17,cct8,vps37d,ywhae,timm17a,rps10,kpna6,rpl23a,cct6a,cblb,tfdp1,ipo5,rps26,fgf9,hspa4,drd1,rpl18a,cct2,pot1,nup133,zfand6,dnm2,fis1,cry2,hspa1l,csnk2a2,cdh1,leprot,eps15,srebf2,prkcd,rab3gap2,six2,fermt1,lamp5,ppp3r1,rps12,gnpat,pex7,tp63,kpna4,ssr3,ywhaq,nmt1,sec61g,tram1,ywhaz,rplp1…	3.1088
222	0.000785816	GO:0009887	animal organ morphogenesis	cyp26b1,fgfr3,fgfrl1,msx1,cpe,hhip,spry1,bbs7,sec24b,pitx2,fras1,cep290,tle2,gcnt1,tle1,syk,tmem119,tbx3,man2a1,crkl,mapk1,xbp1,sema6a,col4a3bp,onecut2,smad2,sod1,rps6ka1,arid1a,id3,grhl3,elf3,hipk1,gpc6,tnfsf11,foxo1,atp8a2,fgf9,myo7a,stim1,tulp3,msx2,chst11,ntn4,frs2,lrig3,sema3c,anxa2,gcnt3,chsy1,smad6,fgfr1,notch2,ephb4,adm,traf6,fgf4,wt1,lgr4,glg1,e2f4,ap2a2,lrp5,irx3,jun,crb1,ep300,dag1,rho…	3.10468
223	0.000837333	GO:1903827	regulation of cellular protein localization	rab11fip5,eif2ak3,ube2d3,oaz1,cep290,abhd17b,rnf31,cabp1,crkl,mapk1,ran,lman1,nedd4l,cct8,tax1bp3,ywhae,epb41,rap1a,tmem30b,ldlrap1,cct6a,tfdp1,ubac2,ipo5,gpc6,lrp1,cct2,gnai1,snx33,sin3a,csk,adam10,abhd17c,vamp8,akap8l,fis1,ppfia1,hspa1l,csnk2a2,cdt1,cdh1,leprot,stx6,srebf2,prkcd,dag1,xpo5,nvl,ppp2r5a,rtn4,fermt1,ppp3r1,dlg1,tp63,pdcd10,prkci,tctex1d2,ywhaq,wnt3a,insig1,itgb1,kif5b,nmt1,egfr,ctn…	3.0771
224	0.000925193	GO:0043069	negative regulation of programmed cell death	avp,tnip2,htt,msx1,wfs1,ppargc1a,apbb2,kdr,hmgb2,hhip,snca,angptl4,klf4,tle1,chd8,tbx3,xbp1,tnfaip8,cast,plk2,nnt,prlr,golph3,acaa2,sod1,ywhae,mnt,arg2,rps6ka1,lamtor5,ptrh2,tpt1,pa2g4,erbb3,lrp1,foxo1,dusp1,msx2,hsp90b1,chst11,sin3a,zfand6,smad6,tnfrsf10b,ikbkb,grk5,notch2,dnmt1,cdkn2d,aurkb,api5,traf6,fgf4,hipk3,wt1,csnk2a2,syvn1,cfl1,tox3,herpud1,cth,jun,dhcr24,gclm,cdc73,prkcd,rhoa,pim1,mitf,…	3.03377
225	0.000962656	GO:0030163	protein catabolic process	fbxl5,wfs1,usp38,bbs7,synpo2,ube2d3,snca,oaz1,abhd17b,ctsv,usp30,chfr,vps37b,xbp1,enc1,lnpep,rnf180,plk2,adamts12,nedd4l,rnf165,bace2,ltn1,usp25,vps37d,rnf19b,rnft1,c2orf40,cul4a,ubac2,lrp1,foxo1,trim24,timp3,csnk1a1,hsp90b1,snx33,anxa2,snx1,usp8,furin,abhd17c,adam9,keap1,ldlr,aurkb,rnf167,pacsin3,ctsd,ppp6r3,csnk2a2,ap2a2,syvn1,stx5,herpud1,cdh1,usp10,banp,cdc20,rnf11,gga1,usp4,tmf1,adamts9,psmd…	3.01653
226	0.000990106	GO:0071407	cellular response to organic cyclic compound	uvssa,ppargc1a,pgrmc2,eif4e,snca,epha5,klf2,tmem38b,klf4,klf9,gna14,pck2,prmt5,mapk1,ran,ncor2,nr2f1,fech,mbd2,runx1,sod1,app,nrip1,arid1a,id3,rap1a,kmt2d,ptges3,gpd1,foxo1,p2ry2,chrm2,trim24,diaph1,drd1,msx2,egr1,hsp90b1,rap1b,cnot2,gnai1,sin3a,rora,cyp1a1,usp8,nr2f2,znf703,ptger1,p2ry11,dnm2,smarca4,calr,fis1,cry2,wt1,esrra,cdh1,cyba,pde4b,gclm,ep300,dag1,rhoa,nr2c2,pim1,tmf1,zfp36l2,fshr,esr1,…	3.00432
227	0.00111879	GO:0071417	cellular response to organonitrogen compound	ppargc1a,klf3,snca,lpl,rab8a,klf2,tmem38b,klf4,gna14,pck2,prmt5,mapk1,xbp1,prlr,brwd1,sod1,app,lamtor5,rap1a,syap1,ipo5,lrp1,sp1,gpd1,foxo1,pdgfd,sesn3,p2ry2,chrm2,diaph1,drd1,atp6v0e1,egr1,hsp90b1,rap1b,nampt,sin3a,csk,ptger1,p2ry11,dnmt1,dnm2,fis1,wt1,esrra,bcar1,cdh1,cyba,leprot,pde4b,atp6v0b,gclm,prkcd,prkar2a,ubr2,arid1b,hdac2,sesn1,prkci,irs1,epha4,klf11,lpin1,cdc5l,zeb1,akap9,ezh2,egfr,ctn…	2.95125
228	0.00126778	GO:0008283	cell population proliferation	avp,mxd4,fgfr3,tacc3,ctbp1,fgfrl1,fgfbp1,msx1,ppargc1a,kdr,cnot7,hmgb2,dchs2,hhip,spry1,nudt6,pitx2,aimp1,cherp,klf4,ift74,dmrt1,klf9,syk,tmem119,tbx3,crkl,mapk1,scarb1,sh2b3,tesc,xbp1,col4a3bp,golph3,c18orf54,mbd2,lipg,smad2,psmg1,morc3,runx1,app,btg3,tax1bp3,ift20,mnt,arg2,tbrg1,rps6ka1,ifnlr1,hipk1,cask,ldlrap1,rbbp4,rpl23a,ppm1d,tfdp1,cul4a,ing1,tnfsf11,kmt2d,erbb3,ptges3,lrp1,sp1,racgap1,fox…	2.89696
229	0.00127244	GO:0051094	positive regulation of developmental process	cyp26b1,fgfbp1,ppargc1a,kdr,hmgb2,spry1,slc9b2,grid2,hmg20b,lpl,angptl4,jund,klf4,ptprd,dmrt1,syk,prmt5,znf219,tmem119,man2a1,crkl,mapk1,cmklr1,tesc,xbp1,sema6a,enc1,plk2,nedd4l,smad2,runx1,olig2,app,chodl,plxna2,arg2,rps6ka1,rab7b,hipk1,rap1a,macf1,syap1,lims1,tnfsf11,acvr1b,pa2g4,erbb3,lrp1,sp1,wdfy2,hmgb1,atp8a2,fgf9,pdgfd,tenm4,stim1,maml1,jade2,msx2,dpysl3,egr1,btg1,frs2,pawr,mapk12,sema3c,a…	2.89536
230	0.00133647	GO:0048511	rhythmic process	ppargc1a,mtnr1a,jund,klf9,gnaq,nfil3,prmt5,ncor2,nrip1,id3,sfpq,cul4a,enox1,sp1,pspc1,egr1,nampt,suv39h2,sin3a,rora,gfpt1,cry2,lgr4,zfhx3,jun,ep300,hebp1,bhlhe40,ppp1cb,tgfb2,dtl,fshr,esr1,hdac2,id2,nos3,id4,tnfrsf11a,ezh2,egfr,nr1d2,kat2b,ncoa2,klf10,pten,cdk1,sirt1,per3,dbp,kdm5c,ogt,ntrk1,srebf1,crebbp,ptprn,map2k6,ahcy,ddx5,znf830,tp53,ereg,sik1,oprl1	2.87404
231	0.00135267	GO:0007169	transmembrane receptor protein tyrosine kinase signaling pathway	eif2ak3,fgfr3,fgfrl1,fgfbp1,kdr,hhip,spry1,snca,ptbp1,epha5,ncbp1,sh3gl2,syk,crkl,mapk1,sh2b3,sema6a,prlr,adamts12,brwd1,app,ift20,rabgef1,cnksr1,wasf2,cblb,cd63,erbb3,lrp1,foxo1,fgf9,pdgfd,sesn3,hnrnph1,hbegf,spry4,atp6v0e1,frs2,wasl,fgfr1,ephb4,fgf4,ap2a2,bcar1,cdh3,cyba,leprot,atp6v0b,eps15,prkcd,rhoa,mapkapk3,arpc4,socs5,fshr,rtn4,nus1,tiparp,irs1,epha4,gigyf2,pak2,ryk,csrnp1,nrp1,foxc1,egfr,…	2.86881
232	0.00136465	GO:0046777	protein autophosphorylation	eif2ak3,fgfr3,kdr,camk2d,mknk2,csnk1g2,syk,ulk1,taok1,nlk,acvr1b,pdgfd,trim24,csk,mex3b,aak1,fgfr1,grk5,aurkb,ephb4,mark2,jun,mapkapk3,pim1,ppp2r5a,tnk2,epha4,pak2,egfr,nek10,yes1,lyn,fgfr2,camk2g,wnk3,taf1,rap2c,ppp2r5c,insrr,ntrk1,eif2ak1,lmtk2,pdpk1,smg1,ptk6,cdk12,stk4,map3k3,mink1,stk39,wnk2,sik1,hck	2.86498
233	0.00142993	GO:0002009	morphogenesis of an epithelium	wdr1,hhip,spry1,bbs7,sec24b,fras1,cep290,klf4,tbx3,adamts12,ripk4,ift20,arid1a,grhl3,rhoc,gpc6,tulp3,hbegf,msx2,ntn4,frs2,sema3c,fgfr1,adm,traf6,wt1,lin7c,lgr4,ap2a2,cfl1,lrp5,irx3,dag1,rhoa,plxnd1,psmd6,tgfb2,six2,esr1,dlg1,tp63,pdcd10,epha4,ryk,sox11,wnt3a,nrp1,sox4,irx2,id4,foxq1,egfr,ctnnb1,tfap2a,edn1,cyp7b1,stk3,rspo2,grhl2,pten,pcdh15,fgfr2,lzts2,mthfr,cdc42,ski,ap2a1,ar,med12,spint2,btbd7…	2.84469
234	0.00143653	GO:0009967	positive regulation of signal transduction	tnip2,fgfr3,moap1,htt,fgfbp1,msx1,rell1,kdr,tspan5,g3bp2,pias4,ptbp1,csnk1g2,cherp,syk,rnf31,prmt5,crkl,mapk1,fzd10,sh2b3,erp29,xbp1,depdc1b,plk2,prlr,golph3,mbd2,c18orf32,smad2,rnf165,prdm15,sod1,app,taok1,hic1,casp1,map3k15,ywhae,sfpq,lamtor5,elf3,rap1a,rhoc,ldlrap1,macf1,lims1,tfdp1,tnfsf11,acvr1b,kmt2d,cd63,erbb3,lrp1,hmgb1,tnfrsf19,fgf9,pdgfd,timp3,maml1,hbegf,msx2,rap1b,frs2,gpr37,csk,usp8,…	2.84268
235	0.00147734	GO:1903729	regulation of plasma membrane organization	sh3gl2,wasl,dnm2,myh9,prkcd,tgfb2,asap1,ar,sytl4,plekhm2	2.83052
236	0.001497	GO:1901988	negative regulation of cell cycle phase transition	cnot7,klf4,plk2,donson,taok1,rpa2,tfdp1,cnot8,spdl1,dusp1,cnot2,e2f7,rint1,ticrr,cdkn2d,aurkb,ccnd1,rfwd3,e2f4,cdt1,cdc20,gadd45a,cdkn2c,cdc73,ep300,psmd6,cenpf,dtl,zfp36l2,gigyf2,anapc15,sox4,ezh2,cul1,pten,cdk1,prmt1,cdk5rap2,foxo4,fhl1,foxn3,gpr132,psma3,lcmt1,plk1,dcun1d3,ctdsp1,cdk5rap3,psmc5,brca1,e2f1,rbl1,usp47,psmd5,znf830,e2f8,psmd3,tp53	2.82478
237	0.00159265	GO:0044843	cell cycle G1/S phase transition	cnot7,plrg1,eif4e,klf4,ccnh,plk2,rpa2,tfdp1,cul4a,acvr1b,ccna1,cnot8,cnot2,e2f7,cyp1a1,brd4,cdkn2d,ccnd1,rfwd3,e2f4,pola2,cdt1,nasp,gadd45a,cdkn2c,gfi1,cdc7,cdc73,mcm5,ep300,cul3,gigyf2,id2,klf11,e2f6,cdc25a,cul2,itgb1,sox4,id4,ezh2,cul1,egfr,mcm3,orc5,pten,cdk1,camk2g,prmt1,taf1,cul4b,fhl1,gpr132,ino80,max,pkd1,dcun1d3,ctdsp1,e2f1,rbl1,e2f8,tp53	2.79788
238	0.00163143	GO:0071396	cellular response to lipid	cyp26b1,tnip2,uvssa,ppargc1a,hmgb2,pgrmc2,eif4e,lpl,epha5,klf4,klf9,pck2,mapk1,ran,fzd10,scarb1,ncor2,tesc,xbp1,nr2f1,ptger4,fech,runx1,nrip1,pdk3,casp1,arid1a,id3,kmt2d,ptges3,smarcd1,foxo1,hmgb1,trim24,msx2,cnot2,gnai1,rora,usp8,nr2f2,znf703,adam9,smarca4,ldlr,calr,fis1,traf6,cry2,sigirr,esrra,pde4b,gfi1,cdc73,ep300,dag1,rhoa,twf2,irak2,nr2c2,pim1,zfp36l2,fshr,myb,esr1,hdac2,tp63,irs1,apob,nos3…	2.78743
239	0.00168452	GO:0071900	regulation of protein serine/threonine kinase activity	htt,acsl1,spry1,snca,syk,crkl,mapk1,fzd10,sh2b3,erp29,ccnh,sod1,taok1,map3k15,syap1,ipo5,tnfsf11,ccna1,pdgfd,chordc1,ppp2ca,spry4,dusp1,frs2,csk,nr2f2,dbnl,fgfr1,adam9,cdkn2d,traf6,ccnd1,hipk3,lrp5,kars,gadd45a,cdkn2c,prkcd,rhoa,mapkapk3,dusp7,irak2,prkar2a,aida,grm1,pdcd10,epha4,kidins220,trib2,higd1a,cdc25a,fzd8,tnfrsf11a,ezh2,egfr,nek10,kat2b,edn1,lyn,stk3,trib1,pten,cdk1,sirt1,rapgef1,ikbkg,s…	2.77352
240	0.00177782	GO:0051130	positive regulation of cellular component organization	ctbp1,moap1,htt,wdr1,stx18,msx1,ppargc1a,atp8a1,kdr,cep135,plk4,synpo2,ube2d3,grid2,snca,g3bp2,sh3gl2,ptprd,dmrt1,syk,rnf31,crkl,mapk1,ulk1,clip1,jmy,enc1,lman1,nedd4l,cct8,app,chodl,ywhae,plxna2,wasf2,rpa2,sfpq,rap1a,rhoc,ldlrap1,macf1,cct6a,ankfy1,lims1,tfdp1,cul4a,cd63,wdr61,lrp1,pip4k2c,atp8a2,eed,g3bp1,msx2,dpysl3,cct2,cnot2,wasl,pot1,optn,sin3a,anxa2,ddx56,rhobtb2,fgfr1,adam9,brd4,akap8l,dn…	2.75011
241	0.00179523	GO:1901990	regulation of mitotic cell cycle phase transition	cep135,cnot7,plrg1,plk4,cep290,klf4,plk2,haus1,donson,app,taok1,ywhae,rpa2,tfdp1,cul4a,cnot8,spdl1,dusp1,cnot2,e2f7,rint1,cep41,sin3a,cyp1a1,tmod3,ticrr,brd4,cdkn2d,aurkb,ccnd1,rfwd3,e2f4,cdt1,cdc20,gadd45a,cdkn2c,cdc7,cdc73,ep300,psmd6,cenpf,dtl,zfp36l2,cul3,gigyf2,id2,anapc15,cdc25a,akap9,sox4,vps4b,ezh2,cul1,egfr,pten,cdk1,prmt1,ssna1,cdk5rap2,foxo4,cul4b,fhl1,foxn3,gpr132,psma3,haus2,ino80,pk…	2.74588
242	0.00194641	GO:0051247	positive regulation of protein metabolic process	avp,eif2ak3,fgfr3,ctbp1,fbxl5,wfs1,ppargc1a,rell1,kdr,acsl1,bbs7,snca,pias4,ptbp1,oaz1,klf2,klf4,syk,tmem119,crkl,mapk1,chfr,fzd10,erp29,arrdc3,rnf180,plk2,dhx29,paip1,prlr,nedd4l,ctif,sod1,app,taok1,casp1,map3k15,timm17a,rap1a,rnf19b,rnft1,syap1,tnfsf11,acvr1b,wdr61,erbb3,lrp1,larp4,wdfy2,foxo1,hmgb1,tnfrsf19,fgf9,pdgfd,eed,ppp2ca,hbegf,irf1,csnk1a1,egr1,rap1b,frs2,pawr,gpr37,mapk12,gramd4,snx33…	2.71077
243	0.00196199	GO:0031399	regulation of protein modification process	avp,eif2ak3,fgfr3,uvssa,ctbp1,htt,wfs1,ppargc1a,rell1,kdr,cnot7,acsl1,spry1,camk2d,snca,pias4,hmg20b,ptbp1,klf4,gnaq,syk,prmt5,tmem119,crkl,mapk1,chfr,fzd10,sh2b3,erp29,tesc,pebp1,sema6a,ccnh,arrdc3,rnf180,nnt,prlr,prdm15,sod1,app,taok1,map3k15,ywhae,rabgef1,rap1a,syap1,cblb,ipo5,tnfsf11,acvr1b,wdr61,erbb3,lrp1,wdfy2,foxo1,ccna1,hmgb1,tnfrsf19,fgf9,pdgfd,chordc1,eed,timp3,ppp2ca,hbegf,spry4,dusp1…	2.7073
244	0.00201974	GO:0060070	canonical Wnt signaling pathway	csnk1g2,tle2,klf4,gnaq,tle4,tle1,chd8,fzd10,prdm15,ift20,foxo1,amer2,fgf9,g3bp1,csnk1a1,egr1,usp8,znf703,lgr4,lrp5,cdh3,wls,ruvbl1,mitf,psmd6,fermt1,sox2,wwtr1,cul3,ryk,sdc1,wnt9a,wnt3a,fzd8,bambi,sox4,egfr,ctnnb1,cdh2,tmem64,frat1,stk3,rspo2,pten,fgfr2,lzts2,bcl9l,nphp4,gsk3a,rapgef1,emd,med12,psma3,nr4a2,igfbp2,jup,stk4,psmc5,sox7,usp47,psmd5,wnk2,psmd3,igfbp4,fzd3,rbpj,dlx5,wnt5b	2.6947
245	0.00205234	GO:0050793	regulation of developmental process	cyp26b1,eif2ak3,fgfr3,fgfbp1,wdr1,msx1,ppargc1a,kdr,hmgb2,spry1,kiaa1109,sec24b,slc9b2,eif4e,grid2,snca,hmg20b,lpl,ptbp1,angptl4,jund,ptbp3,klf2,hopx,klf4,ptprd,dmrt1,ctsv,syk,prmt5,znf219,tmem119,tbx3,man2a1,crkl,mapk1,rhof,cmklr1,tesc,xbp1,sema6a,enc1,nr2f1,plk2,adamts12,nedd4l,mex3c,smad2,celf4,brwd1,runx1,olig2,sod1,app,chodl,flot2,plxna2,arg2,rps6ka1,id3,grhl3,epb41,sox13,rab7b,hipk1,gpr161,…	2.68775
246	0.00219101	GO:0007420	brain development	tacc3,msx1,ppargc1a,pcdh18,bbs7,sec24b,pitx2,grid2,epha5,cep290,chd8,tbx3,crkl,suds3,psmg1,olig2,app,atp5j,ctns,ywhae,plxna2,arid1a,lrp1,fgf9,acat1,kdm7a,tulp3,pitx1,drd1,frs2,slc38a2,rora,csk,nr2f2,fgfr1,dnajb1,dock7,csnk2a2,cbln1,phlpp2,zfhx3,cdh1,wls,dmrta2,xrcc6,rhoa,cenpf,rtn4,btbd3,otx1,gnpat,pou3f2,sox2,b3gnt5,fbxo45,ryk,id2,ywhaq,wnt3a,en2,nrp1,itgb1,kif5b,rab18,sall3,id4,foxc1,ezh2,cntna…	2.65936
247	0.00224562	GO:2000026	regulation of multicellular organismal development	cyp26b1,eif2ak3,fgfbp1,wdr1,msx1,kdr,hmgb2,spry1,kiaa1109,sec24b,slc9b2,eif4e,grid2,snca,hmg20b,angptl4,klf2,klf4,ptprd,dmrt1,ctsv,syk,prmt5,znf219,tmem119,tbx3,man2a1,crkl,mapk1,tesc,xbp1,sema6a,enc1,nr2f1,plk2,adamts12,nedd4l,smad2,celf4,runx1,olig2,sod1,app,chodl,plxna2,id3,grhl3,sox13,rab7b,hipk1,gpr161,rap1a,macf1,cul4a,gpc6,tnfsf11,acvr1b,kmt2d,wdr61,erbb3,lrp1,sp1,racgap1,hmgb1,atp8a2,fgf9…	2.64866
248	0.00225692	GO:0032880	regulation of protein localization	rab11fip5,eif2ak3,exoc1,cep135,slc9b2,ube2d3,lpl,oaz1,rab8a,epha5,cep290,abhd17b,syk,rnf31,cabp1,crkl,mapk1,ran,erp29,xbp1,ptger4,c1qtnf3,golph3,lman1,nedd4l,cct8,tax1bp3,casp1,ywhae,rabgef1,arg2,epb41,rap1a,tmem30b,ldlrap1,cct6a,rab9a,tfdp1,ubac2,ipo5,gpc6,lrp1,hmgb1,panx1,cct2,wasl,gnai1,snx33,sin3a,csk,adam10,usp8,abhd17c,ppia,vamp8,aak1,adam9,akap8l,lgals9,il27ra,fis1,traf6,ppfia1,lgr4,ctsd,h…	2.64648
249	0.00229191	GO:1990778	protein localization to cell periphery	tspan5,rab8a,cplx1,rilpl1,clip1,tesc,golph3,flot2,ift20,epb41,atp1b1,rap1a,ldlrap1,macf1,gpc6,lrp1,sytl2,gnai1,optn,anxa2,csk,adam10,tmem150a,vamp8,ikbkb,rab3d,crb3,ppfia1,lin7c,pkp3,cdh1,gga1,dag1,ppp2r5a,ttc7a,dlg1,prkci,wnt3a,gorasp1,dpp6,itgb1,kif5b,egfr,cdh2,tnfrsf1a,arl3,scn3b,rer1,prkcz,wnk3,ar,ttc7b,ankrd9,lgals3,numb,mpp5,golph3l,cacng3,plk1,pdpk1,emp2,jup,grin1,pkp2,dpp10,slmap	2.6398
250	0.00247	GO:0003002	regionalization	cyp26b1,msx1,hhip,spry1,pitx2,tbx3,crkl,smad2,ets2,plxna2,hipk1,gpr161,eed,tulp3,msx2,frs2,sema3c,nr2f2,chsy1,pcsk6,smad6,fgfr1,wt1,lrp5,irx3,wls,dmrta2,ep300,sema3f,bhlhe40,aida,six2,otx1,tp63,wnt3a,xrcc2,nrp1,hoxa10,irx2,sp8,foxc1,ctnnb1,eomes,edn1,hey1,arc,fgfr2,hes4,ski,ar,med12,pbx2,bmp4,foxa1,vangl2,dlx2,dlx1,lrp2,ttc21b,acvr2a,zeb2,snai1,mafb,lhx2,bptf,srf,tp53,barx1,emx2,rbpj	2.6073
251	0.00254706	GO:0035108	limb morphogenesis	cyp26b1,msx1,fras1,znf219,tbx3,rnf165,plxna2,fgf9,tulp3,pitx1,msx2,chst11,sema3c,fgfr1,fgf4,tgfb2,hdac2,tp63,sox11,wnt9a,sall3,sox4,hoxa10,sp8,ctnnb1,tfap2a,asph,osr2,rspo2,grhl2,fgfr2,ski,pbx2,bmp4,crebbp,ihh,dlx6,dlx5	2.59396
252	0.00254706	GO:0035107	appendage morphogenesis	cyp26b1,msx1,fras1,znf219,tbx3,rnf165,plxna2,fgf9,tulp3,pitx1,msx2,chst11,sema3c,fgfr1,fgf4,tgfb2,hdac2,tp63,sox11,wnt9a,sall3,sox4,hoxa10,sp8,ctnnb1,tfap2a,asph,osr2,rspo2,grhl2,fgfr2,ski,pbx2,bmp4,crebbp,ihh,dlx6,dlx5	2.59396
253	0.00283179	GO:0048736	appendage development	cyp26b1,msx1,bbs7,pitx2,fras1,znf219,tbx3,rnf165,plxna2,fgf9,tulp3,pitx1,msx2,chst11,sema3c,nr2f2,fgfr1,fgf4,tgfb2,hdac2,tp63,sox11,wnt9a,sall3,sox4,hoxa10,sp8,ctnnb1,kat2b,tfap2a,asph,osr2,rspo2,grhl2,fgfr2,ski,pbx2,bmp4,crebbp,ihh,rara,dlx6,dlx5	2.54794
254	0.00283179	GO:0060173	limb development	cyp26b1,msx1,bbs7,pitx2,fras1,znf219,tbx3,rnf165,plxna2,fgf9,tulp3,pitx1,msx2,chst11,sema3c,nr2f2,fgfr1,fgf4,tgfb2,hdac2,tp63,sox11,wnt9a,sall3,sox4,hoxa10,sp8,ctnnb1,kat2b,tfap2a,asph,osr2,rspo2,grhl2,fgfr2,ski,pbx2,bmp4,crebbp,ihh,rara,dlx6,dlx5	2.54794
255	0.00285364	GO:0048666	neuron development	apbb2,mfsd8,sec24b,grid2,rab8a,epha5,ugcg,cep290,sh3gl2,klf4,ptprd,crkl,mapk1,ulk1,xbp1,sema6a,enc1,nr2f1,plk2,nedd4l,atp8b1,onecut2,rnf165,runx1,sod1,app,chodl,pitpna,ift20,plxna2,rap1a,macf1,alcam,lrp1,hmgb1,atp8a2,tenm4,myo7a,jade2,drd1,dpysl3,ntn4,frs2,wasl,sema3c,cdnf,adam10,mef2a,dbnl,ddx56,spg11,fgfr1,dnm2,dock7,zswim4,ephb4,adm,cfl1,mark2,cdh1,ptprf,cdc20,jun,gfi1,kiaa1107,crb1,ep300,mica…	2.5446
256	0.00293377	GO:0009987	cellular process	avp,paip2b,cyp26b1,rab11fip5,chmp3,eif2ak3,tnip2,mxd4,nat8l,letm1,fgfr3,tacc3,slbp,nkx1-1,uvssa,ctbp1,fgfrl1,moap1,htt,fgfbp1,fbxl5,hs3st1,znf518b,wdr1,lyar,stx18,msx1,wfs1,man2b2,s100p,htra3,dhx15,ppargc1a,ncapg,pcdh7,pgm2,rell1,klf3,pds5a,apbb2,slc30a9,atp8a1,scfd2,kdr,exoc1,cep135,lonrf1,cnot7,mtnr1a,acsl1,dctd,aga,neil3,spcs3,hmgb2,cpe,msmo1,rbm46,plrg1,fhdc1,hhip,smarca5,usp38,ndufc1,pgrmc2,…	2.53257
257	0.00313971	GO:0007267	cell-cell signaling	avp,rab11fip5,fgfr3,fgfbp1,cpe,aimp1,slc9b2,eif4e,grid2,snca,pias4,csnk1g2,rab8a,epha5,cplx1,tle2,klf4,ptprd,gnaq,tle4,tle1,chd8,tbx3,crkl,mapk1,fzd10,lnpep,depdc1b,plk2,c1qtnf3,cplx4,mbd2,smad2,celf4,gja8,prdm15,runx1,app,cxadr,hic1,tax1bp3,nlk,ift20,grhl3,cask,rap1a,macf1,fgf14,gpc6,tnfsf11,wdr61,lrp1,foxo1,amer2,fgf9,panx1,chrm2,nmur2,vdac1,g3bp1,ppp2ca,csnk1a1,drd1,egr1,rap1b,nampt,gnai1,grm3…	2.50311
258	0.00345714	GO:0097190	apoptotic signaling pathway	avp,eif2ak3,fgfr3,moap1,htt,msx1,wfs1,hmgb2,pias4,mknk2,erp29,xbp1,jmy,acaa2,sod1,hic1,casp1,ywhae,mnt,sfpq,hipk1,tfdp1,cul4a,tpt1,acvr1b,erbb3,krt8,timp3,pawr,pdia3,tnfrsf10b,fgfr1,cdkn2d,lgals9,fis1,csnk2a2,syvn1,herpud1,cth,jun,gclm,ep300,pla2g6,prkcd,arl6ip5,tgfb2,msh6,ppp3r1,tp63,pdcd10,skil,cul3,pak2,ywhaq,nos3,higd1a,zmynd11,cul2,nrp1,nmt1,dfna5,dap,cul1,ctnnb1,rb1cc1,stk3,ywhaz,rrm2b,tnfr…	2.46128
259	0.00390685	GO:0060548	negative regulation of cell death	avp,tnip2,htt,msx1,wfs1,ppargc1a,apbb2,kdr,hmgb2,hhip,snca,angptl4,klf4,tle1,chd8,tbx3,xbp1,tnfaip8,cast,plk2,nnt,prlr,golph3,acaa2,sod1,ywhae,mnt,arg2,rps6ka1,lamtor5,ptrh2,tpt1,pa2g4,erbb3,lrp1,foxo1,dusp1,msx2,hsp90b1,chst11,gpr37,sin3a,pde8a,zfand6,smad6,tnfrsf10b,ikbkb,grk5,notch2,dnmt1,cdkn2d,aurkb,api5,traf6,fgf4,hipk3,wt1,csnk2a2,syvn1,cfl1,tox3,herpud1,cth,jun,dhcr24,cacybp,gclm,cdc73,pr…	2.40817
260	0.00437269	GO:0010948	negative regulation of cell cycle process	cnot7,klf4,dmrt1,plk2,donson,taok1,rpa2,rbbp4,tfdp1,eed,cnot8,spdl1,dusp1,cnot2,e2f7,rint1,ticrr,cdkn2d,calr,aurkb,ccnd1,rfwd3,e2f4,cdt1,cdc20,gadd45a,cdkn2c,cdc7,cdc73,ep300,psmd6,cenpf,dtl,zfp36l2,msh6,gigyf2,e2f6,anapc15,sox4,ezh2,cul1,kat2b,pten,cdk1,prmt1,naa10,cdk5rap2,foxo4,fhl1,foxn3,bmp4,gpr132,psma3,max,lcmt1,plk1,dcun1d3,ctdsp1,rpl23,cdk5rap3,psmc5,brca1,e2f1,rbl1,usp47,psmd5,znf830,e2…	2.35925
261	0.00471863	GO:0009725	response to hormone	avp,uvssa,ppargc1a,acsl1,hmgb2,pgrmc2,eif4e,lpl,jund,rab8a,epha5,ugcg,klf9,gcnt1,gnaq,ctsv,pck2,crkl,ran,ncor2,xbp1,nr2f1,ptger4,prlr,fech,mbd2,brwd1,runx1,nrip1,arid1a,syap1,kmt2d,ptges3,sp1,foxo1,acat1,sesn3,chrm2,timp3,dusp1,msx2,atp6v0e1,egr1,btg1,rap1b,cnot2,gnai1,anxa2,rora,csk,usp8,nr2f2,znf703,adam9,smarca4,calr,adm,cry2,ccnd1,wt1,lgr4,esrra,bcar1,cyba,nasp,jun,leprot,atp6v0b,dhcr24,cacyb…	2.32618
262	0.0047264	GO:1901699	cellular response to nitrogen compound	ppargc1a,klf3,snca,lpl,rab8a,klf2,tmem38b,klf4,gna14,gnaq,pck2,prmt5,crkl,mapk1,xbp1,prlr,brwd1,sod1,app,lamtor5,rap1a,syap1,ipo5,lrp1,sp1,gpd1,foxo1,pdgfd,sesn3,p2ry2,chrm2,diaph1,drd1,atp6v0e1,egr1,hsp90b1,rap1b,nampt,sin3a,csk,ptger1,p2ry11,dnmt1,dnm2,fis1,wt1,esrra,bcar1,cdh1,cyba,leprot,pde4b,atp6v0b,gclm,prkcd,prkar2a,ubr2,arid1b,hdac2,sesn1,prkci,irs1,epha4,klf11,lpin1,cdc5l,zeb1,akap9,ezh…	2.32547
263	0.00495345	GO:0035295	tube development	eif2ak3,fgfbp1,kdr,hhip,spry1,bbs7,sec24b,aimp1,eif4e,angptl4,cep290,klf2,tmem38b,klf4,syk,chd8,tbx3,man2a1,crkl,mapk1,xbp1,sema6a,plk2,adamts12,smad2,runx1,plxna2,arg2,arid1a,wasf2,grhl3,hipk1,gpr161,rap1a,ptges3,lrp1,sp1,fgf9,acat1,aqp11,stim1,tulp3,msx2,btg1,e2f7,sema3c,anxa2,rora,cyp1a1,nr2f2,nup133,smad6,fgfr1,ldlr,ephb4,adm,traf6,wt1,lgr4,cfl1,lrp5,irx3,jun,jak1,myh9,ep300,dag1,rhoa,plxnd1,…	2.30509
264	0.00517467	GO:2001233	regulation of apoptotic signaling pathway	avp,eif2ak3,moap1,htt,msx1,wfs1,hmgb2,pias4,erp29,xbp1,acaa2,sod1,ywhae,mnt,sfpq,tfdp1,tpt1,timp3,pdia3,tnfrsf10b,fgfr1,cdkn2d,lgals9,fis1,csnk2a2,syvn1,herpud1,cth,gclm,pla2g6,prkcd,ppp3r1,tp63,skil,pak2,ywhaq,nos3,higd1a,zmynd11,nrp1,nmt1,dfna5,ctnnb1,rb1cc1,stk3,ywhaz,rrm2b,fas,pten,sgms1,rtkn2,sirt1,hells,cxcl12,park7,gsk3a,trim32,ar,bmp4,apopt1,hif1a,lgals3,bmf,pam16,ackr3,nfe2l2,nr4a2,stk4,…	2.28612
265	0.00517743	GO:0010243	response to organonitrogen compound	wfs1,dhx15,ppargc1a,klf3,snca,lpl,jund,rab8a,klf2,tmem38b,klf4,gcnt1,gna14,syk,pck2,prmt5,mapk1,ncor2,xbp1,prlr,brwd1,sod1,app,usp25,lamtor5,rap1a,rnft1,syap1,ubac2,ipo5,lrp1,sp1,gpd1,foxo1,pdgfd,sesn3,panx1,p2ry2,chrm2,diaph1,dusp1,drd1,atp6v0e1,egr1,hsp90b1,btg1,rap1b,nampt,gnai1,sin3a,csk,ptger1,p2ry11,dnmt1,dnm2,ldlr,fis1,adm,cry2,ccnd1,wt1,syvn1,cfl1,esrra,bcar1,herpud1,cdh1,cyba,jun,leprot,…	2.28589
266	0.00531151	GO:0006338	chromatin remodeling	hmgb2,smarca5,chd8,chd1,mbd2,mis18a,baz1b,arid1a,rbbp4,smarcd1,hmgb1,suv39h2,smarca4,chd3,sycp3,cenpn,nasp,kdm4a,ruvbl1,fshr,myb,esr1,arid1b,hdac2,tp63,ptma,kat2b,hells,chd4,rere,kdm5c,cenpi,zbtb1,foxa1,baz1a,bahd1,ino80,anp32e,smarcd2,smarcc1,bptf,spty2d1	2.27478
267	0.00560191	GO:0010506	regulation of autophagy	htt,kdr,exoc1,mfsd8,cisd2,snca,rab8a,sptlc1,mtmr3,usp30,ulk1,xbp1,plk2,ift20,lamtor5,gpsm1,pip4k2c,foxo1,hmgb1,sesn3,vdac1,atp6v0e1,nampt,optn,tmem150a,csnk2a2,usp10,kdm4a,atp6v0b,qsox1,ep300,srebf2,nprl2,rab3gap2,sesn1,atg16l1,wac,dap,rb1cc1,atp6v1h,trim8,sirt1,park7,gsk3a,ikbkg,atp6v1g1,rnf5,sptlc2,hif1a,snx6,bmf,atp6v1d,ubqln4,kat8,srebf1,mlst8,tlk2,becn1,mtmr9,svip,foxk2,lrsam1,tp53,atp6v1e1,…	2.25166
268	0.00570461	GO:0033993	response to lipid	avp,cyp26b1,tnip2,uvssa,ppargc1a,acsl1,hmgb2,pgrmc2,adh5,eif4e,snca,lpl,jund,epha5,klf4,klf9,ctsv,pck2,mapk1,ran,fzd10,scarb1,ncor2,tesc,xbp1,nr2f1,ptger4,fech,mbd2,smad2,runx1,ifnar1,nrip1,pdk3,casp1,arid1a,id3,kmt2d,ptges3,smarcd1,foxo1,hmgb1,trim24,hnrnpa0,dusp1,msx2,cnot2,gnai1,rora,cyp1a1,usp8,nr2f2,znf703,smad6,adam9,ptger1,cdkn2d,smarca4,ldlr,calr,lgals9,fis1,adm,traf6,cry2,ccnd1,sigirr,es…	2.24377
269	0.0057199	GO:0061919	process utilizing autophagic mechanism	chmp3,htt,ppargc1a,kdr,exoc1,mfsd8,synpo2,cisd2,snca,rab8a,tomm5,sptlc1,mtmr3,usp30,ulk1,vps37b,xbp1,plk2,chmp2b,emc6,vps37d,ift20,lamtor5,atg3,gpsm1,pip4k2c,foxo1,hmgb1,sesn3,vdac1,atp6v0e1,rab24,nampt,optn,tmem150a,vamp8,vps41,fis1,tmem41b,sbf2,csnk2a2,mark2,usp10,kdm4a,atp6v0b,qsox1,ep300,srebf2,nprl2,mtmr14,rab3gap2,rab1a,sesn1,atg16l1,wac,acbd5,dap,vps4b,rb1cc1,atp6v1h,ubxn2b,nrbf2,trim8,sir…	2.24261
270	0.0057199	GO:0006914	autophagy	chmp3,htt,ppargc1a,kdr,exoc1,mfsd8,synpo2,cisd2,snca,rab8a,tomm5,sptlc1,mtmr3,usp30,ulk1,vps37b,xbp1,plk2,chmp2b,emc6,vps37d,ift20,lamtor5,atg3,gpsm1,pip4k2c,foxo1,hmgb1,sesn3,vdac1,atp6v0e1,rab24,nampt,optn,tmem150a,vamp8,vps41,fis1,tmem41b,sbf2,csnk2a2,mark2,usp10,kdm4a,atp6v0b,qsox1,ep300,srebf2,nprl2,mtmr14,rab3gap2,rab1a,sesn1,atg16l1,wac,acbd5,dap,vps4b,rb1cc1,atp6v1h,ubxn2b,nrbf2,trim8,sir…	2.24261
271	0.00605721	GO:0048732	gland development	msx1,pitx2,pck2,prmt5,tbx3,man2a1,crkl,mapk1,ncor2,xbp1,prlr,onecut2,baat,smad2,sod1,rps6ka1,elf3,rap1a,tnfsf11,acat1,pitx1,msx2,ntn4,frs2,e2f7,sema3c,cyp1a1,znf703,fgfr1,ccnd1,wt1,fa2h,csnk2a2,lrp5,cdh1,jun,wls,cebpg,dag1,plxnd1,tgfb2,rtn4,esr1,pou3f2,sox2,tp63,cul3,id2,wnt3a,nrp1,id4,foxc1,tnfrsf11a,ezh2,egfr,ctnnb1,rb1cc1,cyp7b1,pten,fgfr2,cdc42,dbp,ar,btbd7,bmp4,zbtb1,hif1a,six4,srsf5,foxa1,p…	2.21773
272	0.00667932	GO:0051239	regulation of multicellular organismal process	avp,cyp26b1,rab11fip5,eif2ak3,fgfbp1,wdr1,msx1,ppargc1a,kdr,acsl1,hmgb2,spry1,kiaa1109,sec24b,camk2d,slc9b2,eif4e,grid2,snca,hmg20b,lpl,angptl4,jund,klf2,tmem38b,klf4,ptprd,dmrt1,ctsv,syk,prmt5,znf219,smtn,tmem119,tbx3,man2a1,c5orf30,crkl,mapk1,scarb1,sh2b3,cmklr1,tesc,xbp1,sema6a,enc1,arrdc3,nr2f1,lnpep,plk2,ptger4,prlr,c1qtnf3,adamts12,nedd4l,lipg,smad2,celf4,runx1,olig2,sod1,app,atp5j,chodl,cx…	2.17527
273	0.00672366	GO:0006974	cellular response to DNA damage stimulus	uvssa,moap1,msx1,pds5a,slc30a9,cnot7,neil3,hmgb2,ube2d3,pias4,mapk1,rfc5,jmy,msh3,ccnh,plk2,poli,donson,taok1,hic1,zswim7,baz1b,rpa2,sfpq,hipk1,ppm1d,rad51d,tfdp1,cul4a,tpt1,foxo1,rfc3,hmgb1,rhno1,cnot8,cnot2,e2f7,mapk12,rint1,ticrr,tipin,brd4,cdkn2d,traf6,ccnd1,ddb2,fen1,rfwd3,e2f4,zbtb3,usp10,gadd45a,cdc7,prmt6,xrcc6,mcm5,cebpg,ep300,prkcd,atrip,ruvbl1,hmces,dtl,msh6,aplf,sgk1,shprh,tp63,skil,g…	2.17239
274	0.00688466	GO:0032270	positive regulation of cellular protein metabolic process	avp,eif2ak3,fgfr3,ctbp1,fbxl5,wfs1,ppargc1a,rell1,kdr,acsl1,bbs7,snca,pias4,ptbp1,klf4,syk,tmem119,crkl,mapk1,chfr,fzd10,erp29,arrdc3,rnf180,plk2,dhx29,paip1,prlr,ctif,sod1,app,taok1,casp1,map3k15,timm17a,rap1a,rnf19b,rnft1,syap1,tnfsf11,acvr1b,wdr61,erbb3,lrp1,larp4,wdfy2,hmgb1,tnfrsf19,fgf9,pdgfd,eed,ppp2ca,hbegf,csnk1a1,egr1,rap1b,frs2,gpr37,mapk12,gramd4,snx33,anxa2,csk,pde8a,furin,arrdc4,dbn…	2.16212
275	0.00735062	GO:0032092	positive regulation of protein binding	ran,plk2,app,epb41,syap1,lrp1,ppp2ca,anxa2,aktip,ep300,plxnd1,nvl,epha4,wnt3a,nrp1,bambi,plcl2,stk3,park7,taf1,bmp4,lgals3,pkd1,stk4,traf2,ralb,derl1	2.13368
276	0.00747557	GO:0006260	DNA replication	slbp,pds5a,rfc5,msh3,poli,donson,tbrg1,id3,rpa2,rbbp4,rfc3,rhno1,ppp2ca,e2f7,sin3a,ticrr,tipin,fgfr1,fen1,rfwd3,pola2,cdt1,nasp,jun,cacybp,cdc7,mcm5,atrip,sde2,dtl,msh6,esco2,egfr,mcm3,orc5,rrm2b,cdk1,cdc42,pnkp,pold1,set,baz1a,ino80,nt5m,e4f1,kat7,brca1,ncoa6,map2k4,rnaseh2a,znf830,e2f8,smarcal1,tp53,nup98,ereg,mcmbp,recql4	2.12636
277	0.00768891	GO:0051338	regulation of transferase activity	fgfr3,uvssa,htt,acsl1,spry1,snca,klf4,gnaq,syk,crkl,mapk1,fzd10,sh2b3,erp29,tesc,rfc5,ccnh,arrdc3,prlr,sod1,app,taok1,map3k15,rap1a,syap1,cblb,ipo5,tnfsf11,erbb3,ptges3,ccna1,rfc3,pdgfd,chordc1,ppp2ca,spry4,dusp1,egr1,frs2,cct2,pot1,csk,nr2f2,arrdc4,dbnl,tnfrsf10b,fgfr1,adam9,cdkn2d,aurkb,traf6,ccnd1,hipk3,mark2,lrp5,kars,cdc20,gadd45a,cdkn2c,xrcc6,prkcd,dag1,rhoa,mapkapk3,nprl2,dusp7,irak2,prkar…	2.11413
278	0.00781031	GO:0023052	signaling	avp,cyp26b1,rab11fip5,eif2ak3,tnip2,fgfr3,uvssa,fgfrl1,moap1,htt,fgfbp1,msx1,wfs1,htra3,ppargc1a,rell1,apbb2,kdr,exoc1,cnot7,mtnr1a,acsl1,hmgb2,cpe,hhip,pgrmc2,spry1,bbs7,camk2d,aimp1,arhgef38,slc9b2,ube2d3,metap1,eif4e,tspan5,grid2,snca,g3bp2,pias4,lpl,gng7,kiss1r,ptbp1,mknk2,csnk1g2,rab8a,epha5,ncbp1,dnajc25,ugcg,cplx1,myo9b,cherp,ncln,tle2,sh3gl2,tmem38b,klf4,ift74,ptprd,dmrt1,gna14,gnaq,tle4,…	2.10733
279	0.00797307	GO:0007154	cell communication	avp,cyp26b1,rab11fip5,eif2ak3,tnip2,fgfr3,uvssa,fgfrl1,moap1,htt,fgfbp1,msx1,wfs1,htra3,ppargc1a,rell1,apbb2,kdr,exoc1,cnot7,mtnr1a,acsl1,hmgb2,cpe,hhip,pgrmc2,spry1,bbs7,camk2d,aimp1,arhgef38,slc9b2,ube2d3,metap1,eif4e,tspan5,grid2,snca,g3bp2,pias4,lpl,gng7,kiss1r,ptbp1,mknk2,csnk1g2,rab8a,epha5,fras1,ncbp1,dnajc25,ugcg,cplx1,myo9b,cherp,ncln,tle2,sh3gl2,tmem38b,klf4,ift74,ptprd,dmrt1,gna14,gnaq…	2.09837
280	0.00927064	GO:0048598	embryonic morphogenesis	cyp26b1,msx1,bbs7,sec24b,fras1,cep290,klf4,tbx3,mapk1,smad2,ets2,sod1,arid1a,grhl3,hipk1,atp8a2,fgf9,tenm4,myo7a,tulp3,pitx1,msx2,chst11,frs2,lrig3,fgfr1,adm,ext2,traf6,fgf4,cfl1,lrp5,irx3,wls,cdc73,dag1,tgfb2,six2,otx1,hdac2,sox2,dlg1,tp63,cul3,sox11,id2,wnt9a,wnt3a,insig1,dnajb6,wdr60,itgb1,zeb1,sox4,hoxa10,irx2,sp8,foxc1,ctnnb1,eomes,tfap2a,edn1,osr2,stk3,rspo2,grhl2,pcdh15,fgfr2,mthfr,ski,ric…	2.03289
281	0.009557	GO:0001655	urogenital system development	cyp26b1,wfs1,dchs2,spry1,fras1,cep290,gcnt1,crkl,smad2,ift20,arg2,id3,acat1,pdgfd,aqp11,egr1,frs2,gcnt3,nup133,smad6,fgfr1,wt1,lgr4,irx3,tgfb2,cenpf,six2,epcam,esr1,dlg1,tp63,tiparp,wwtr1,epha4,sox11,id2,odc1,sdc1,nrp1,sox4,irx2,id4,foxc1,ctnnb1,tfap2a,cyp7b1,osr2,rrm2b,pten,fgfr2,arl3,lzts2,hells,ar,bmp4,six4,foxa1,vangl2,pkd1,stat1,wnt6,pkhd1,smarcc1,rara,emx2,c1galt1	2.01968
282	0.00960307	GO:0044419	interspecies interaction between organisms	chmp3,ctbp1,kdr,exoc1,cnot7,eif4e,g3bp2,ptbp1,psip1,syk,mapk1,ulk1,ran,scarb1,vps37b,tnpo1,chd1,nedd4l,rpl17,morc3,chmp2b,cxadr,vps37d,ywhae,wasf2,lamtor5,rps10,kpna6,rpl23a,rab9a,cul4a,ipo5,sugt1,rps26,sp1,aaas,krt8,nup205,vdac1,g3bp1,slc22a5,rpl18a,anxa2,crtc3,furin,ppia,vamp8,nup133,ikbkb,brd4,c19orf66,keap1,ilf3,smarca4,ldlr,lgals9,ap2a2,cfl1,cdh1,kars,kdm4a,jun,eps15,xpr1,gfi1,prmt6,xrcc6,ep…	2.01759
283	0.0103	GO:0048608	reproductive structure development	hmgb2,plk4,dmrt1,ctsv,tbx3,crkl,mapk1,hsd17b4,sod1,nrip1,arid1a,krt8,fgf9,frs2,e2f7,nr2f2,adm,ccnd1,wt1,lgr4,nasp,dhcr24,tmf1,tgfb2,epas1,fshr,esr1,srd5a2,dlg1,tp63,tiparp,hs6st1,sdc1,nos3,dnajb6,hoxa10,id4,foxc1,egfr,ctnnb1,eomes,cyp7b1,hey1,stk3,grhl2,zfat,pten,htra1,fgfr2,sirt1,lhb,ar,tex11,spint2,bmp4,hif1a,six4,foxa1,arnt,ntrk1,pkd1,lrp2,acvr2a,ptprn,taf4,stk4,plcd3,snai1,grb2,tfap2c,fancg,d…	1.98716
284	0.0108599	GO:0006325	chromatin organization	ctbp1,ppargc1a,hmgb2,smarca5,camk2d,tet2,snca,hmg20b,prmt5,chd8,setd1b,suds3,chd1,mier3,mbd2,brwd1,mis18a,baz1b,arid1a,sfpq,rlf,rbbp4,ppm1d,ing1,kansl2,kmt2d,wdr61,smarcd1,rcbtb1,hmgb1,eed,kdm7a,jade2,drd1,brd1,suv39h2,sin3a,h2afv,kat6a,brd4,akap8l,dnmt1,smarca4,c17orf49,aurkb,chd3,sycp3,ddb2,cenpn,banp,nasp,kdm4a,gfi1,prmt6,cdc73,ep300,cbx7,prkcd,ruvbl1,h1fx,brpf1,ubr2,fshr,myb,esr1,shprh,arid1b…	1.96418
285	0.0118365	GO:0031098	stress-activated protein kinase signaling cascade	tnip2,rell1,syk,crkl,mapk1,fzd10,ptger4,app,taok1,tnfsf11,foxo1,hmgb1,tnfrsf19,dusp1,dbnl,ikbkb,lgals9,traf6,hipk3,kars,gadd45a,rhoa,irak2,arl6ip5,aida,tgfb2,dlg1,pdcd10,epha4,pak2,pbk,zmynd11,fzd8,tnfrsf11a,cul1,egfr,ulk4,edn1,rb1cc1,lyn,sdcbp,stk3,trib1,fas,cdc42,prmt1,rapgef1,ikbkg,igbp1,vangl2,ern2,zeb2,stk4,map3k3,kat7,map2k6,ube2v1,sphk1,map2k4,mink1,stk39,map3k2,traf2	1.92678
286	0.0120933	GO:0000165	MAPK cascade	avp,tnip2,fgfr3,rell1,kdr,spry1,klf4,syk,prmt5,crkl,mapk1,fzd10,sh2b3,erp29,pebp1,sema6a,ptger4,mapk4,prdm15,sod1,app,taok1,map3k15,ywhae,nlk,rap1a,kbtbd7,tnfsf11,erbb3,lrp1,foxo1,hmgb1,tnfrsf19,fgf9,pdgfd,timp3,ppp2ca,hbegf,spry4,dusp1,rap1b,frs2,gpr37,mapk12,csk,pde8a,mef2a,dbnl,ikbkb,fgfr1,adam9,notch2,lgals9,traf6,fgf4,hipk3,kars,jun,jak1,gadd45a,prkcd,dag1,mapkapk3,dusp7,irak2,arl6ip5,psmd6,…	1.91746
287	0.0125025	GO:1902115	regulation of organelle assembly	htt,stx18,cep135,plk4,grid2,g3bp2,ptprd,mtmr3,ulk1,plk2,chmp2b,ift20,atg3,pip4k2c,g3bp1,cnot2,vdac3,evi5l,dnm2,cbln1,rhoa,nprl2,rab3gap2,tctex1d2,stag1,sdc1,vps4b,kat2b,edn1,sdcbp,asap1,cdk5rap2,arhgef9,rnf5,lrfn1,plk1,hap1,becn1,brca1,sept9,chmp5,lrsam1,ralb,hck	1.903
288	0.0126064	GO:0070925	organelle assembly	chmp3,htt,wdr1,stx18,cep135,cnot7,fhdc1,plk4,bbs7,synpo2,grid2,g3bp2,rfx2,lsm4,rab8a,cep290,ift74,ptprd,mtmr3,c5orf30,ulk1,rilpl1,vps37b,tnpo1,plk2,brix1,onecut2,haus1,chmp2b,emc6,vps37d,ywhae,ift22,ift20,rab7b,atg3,rps10,rpl23a,mis12,ccdc65,pip4k2c,aaas,krt8,racgap1,myo7a,mrpl22,g3bp1,cep83,rab3ip,cnot2,cep41,tmod3,mef2a,dbnl,spg11,vdac3,evi5l,ppan,dnm2,aurkb,tmem41b,tmem138,e2f4,mrpl11,cbln1,ce…	1.89941
289	0.012608	GO:0071383	cellular response to steroid hormone stimulus	uvssa,ppargc1a,pgrmc2,eif4e,klf9,pck2,ran,ncor2,nr2f1,fech,runx1,nrip1,arid1a,kmt2d,ptges3,foxo1,cnot2,rora,usp8,nr2f2,smarca4,calr,cry2,esrra,ep300,rhoa,nr2c2,zfp36l2,fshr,esr1,tp63,egfr,ctnnb1,nr1d2,adtrp,edn1,cyp7b1,sirt1,park7,nr1h2,ar,bmp4,foxa1,nr4a2,pck1,pmepa1,brca1,ncoa6,ddx5,aqp1,nr1i2,rara,kctd6	1.89935
290	0.0129734	GO:0071229	cellular response to acid chemical	cyp26b1,ppargc1a,kdr,lpl,klf2,klf4,fzd10,tesc,xbp1,ptger4,pdk3,id3,lamtor5,ipo5,smarcd1,pdgfd,sesn3,egr1,dnmt1,ldlr,cyba,gclm,twf2,ubr2,myb,hdac2,sesn1,irs1,apob,wnt9a,wnt3a,zeb1,egfr,edn1,yes1,lyn,fgfr2,cpeb3,srebf1,wnt6,pck1,ptk6,e2f1,aqp1,xrcc5,rara,wnt5b	1.88694
291	0.0134714	GO:0061458	reproductive system development	hmgb2,plk4,dmrt1,ctsv,tbx3,crkl,mapk1,hsd17b4,sod1,nrip1,arid1a,krt8,fgf9,frs2,e2f7,nr2f2,adm,ccnd1,wt1,lgr4,nasp,dhcr24,tmf1,tgfb2,epas1,fshr,esr1,srd5a2,dlg1,tp63,tiparp,hs6st1,sdc1,nos3,dnajb6,hoxa10,id4,foxc1,egfr,ctnnb1,eomes,cyp7b1,hey1,stk3,grhl2,zfat,pten,htra1,fgfr2,sirt1,lhb,ar,tex11,spint2,bmp4,hif1a,six4,foxa1,arnt,ntrk1,pkd1,lrp2,acvr2a,ptprn,taf4,stk4,plcd3,snai1,grb2,tfap2c,fancg,d…	1.87059
292	0.0135156	GO:0009314	response to radiation	uvssa,metap1,jund,gnaq,fech,app,ctns,ift20,ppm1d,atp8a2,rhno1,dusp1,drd1,egr1,nampt,ticrr,tipin,cdkn2d,dnm2,aurkb,cry2,ccnd1,ddb2,fen1,rfwd3,kars,cyba,jun,gadd45a,xrcc6,ep300,trove2,bhlhe40,ppp1cb,sde2,dtl,camkmt,msh6,rhbdd1,id2,pbk,cdc25a,xrcc2,itgb1,nmt1,tnfrsf11a,egfr,sirt1,cxcl12,sdf4,nphp4,per3,ric8a,pnkp,pold1,trim32,taf1,cul4b,fmr1,syngap1,fos,zbtb1,hif1a,bmf,ino80,ntrk1,cops3,crebbp,dcun1…	1.86916
293	0.0139439	GO:0090068	positive regulation of cell cycle process	msx1,cnot7,plrg1,plk4,dmrt1,plk2,rxfp3,app,sfpq,tfdp1,cul4a,racgap1,rhno1,cnot8,msx2,cnot2,e2f7,sin3a,cyp1a1,tmod3,fgfr1,brd4,aurkb,ccnd1,fen1,e2f4,lrp5,cdt1,gadd45a,cdc7,cdc73,ep300,rhoa,poc1a,dtl,cul3,id2,cdc25a,sox4,vps4b,ezh2,egfr,edn1,ubxn2b,cdk1,cdc42,prmt1,foxo4,cul4b,ino80,rnf112,rpl23,becn1,brca1,e2f1,sphk1,e2f8,tp53,ereg	1.85562
294	0.014002	GO:0023056	positive regulation of signaling	tnip2,fgfr3,moap1,htt,fgfbp1,msx1,rell1,kdr,aimp1,tspan5,snca,g3bp2,pias4,ptbp1,csnk1g2,cherp,syk,rnf31,prmt5,crkl,mapk1,fzd10,sh2b3,erp29,xbp1,depdc1b,plk2,prlr,c1qtnf3,golph3,mbd2,c18orf32,smad2,rnf165,prdm15,sod1,app,taok1,hic1,casp1,map3k15,ywhae,sfpq,lamtor5,elf3,rap1a,rhoc,ldlrap1,macf1,lims1,tfdp1,tnfsf11,acvr1b,kmt2d,cd63,erbb3,lrp1,hmgb1,tnfrsf19,fgf9,pdgfd,timp3,maml1,hbegf,drd1,msx2,ra…	1.85381
295	0.0141696	GO:0044773	mitotic DNA damage checkpoint	cnot7,plk2,donson,taok1,rpa2,tfdp1,cnot8,cnot2,e2f7,rint1,tipin,ccnd1,rfwd3,e2f4,gadd45a,ep300,gigyf2,sox4,cdk1,prmt1,foxo4,foxn3,cdk5rap3,e2f1,znf830,e2f8,tp53	1.84864
296	0.0142136	GO:0035239	tube morphogenesis	eif2ak3,fgfbp1,kdr,hhip,spry1,bbs7,sec24b,aimp1,angptl4,cep290,klf2,klf4,syk,tbx3,xbp1,sema6a,plk2,adamts12,smad2,runx1,arid1a,wasf2,grhl3,hipk1,rap1a,lrp1,sp1,fgf9,stim1,tulp3,msx2,btg1,e2f7,anxa2,rora,nr2f2,fgfr1,ldlr,ephb4,adm,traf6,wt1,lgr4,cfl1,lrp5,irx3,jun,jak1,myh9,dag1,rhoa,plxnd1,adamts9,tgfb2,six2,epas1,meis1,esr1,qki,nus1,dlg1,tp63,pdcd10,tiparp,epha4,hs6st1,sox11,id2,apob,nos3,wnt3a,…	1.8473
297	0.0147364	GO:1901987	regulation of cell cycle phase transition	cep135,cnot7,plrg1,plk4,cep290,klf4,plk2,haus1,donson,app,taok1,ywhae,rpa2,tfdp1,cul4a,cnot8,spdl1,dusp1,cnot2,e2f7,rint1,cep41,sin3a,cyp1a1,tmod3,ticrr,brd4,cdkn2d,aurkb,ccnd1,rfwd3,e2f4,cdt1,cdc20,gadd45a,cdkn2c,cdc7,cdc73,ep300,psmd6,cenpf,dtl,zfp36l2,cul3,gigyf2,id2,anapc15,cdc25a,akap9,sox4,vps4b,ezh2,cul1,egfr,nek10,pten,cdk1,prmt1,ssna1,cdk5rap2,taf1,foxo4,cul4b,fhl1,foxn3,gpr132,psma3,hau…	1.83161
298	0.0147815	GO:0023014	signal transduction by protein phosphorylation	avp,tnip2,fgfr3,rell1,kdr,spry1,klf4,syk,prmt5,crkl,mapk1,fzd10,sh2b3,erp29,pebp1,sema6a,ptger4,mapk4,prdm15,sod1,app,taok1,map3k15,ywhae,nlk,rap1a,kbtbd7,tnfsf11,erbb3,lrp1,foxo1,hmgb1,tnfrsf19,fgf9,pdgfd,timp3,ppp2ca,hbegf,spry4,dusp1,rap1b,frs2,gpr37,mapk12,csk,pde8a,mef2a,dbnl,ikbkb,fgfr1,adam9,notch2,lgals9,traf6,fgf4,hipk3,kars,jun,jak1,gadd45a,prkcd,dag1,mapkapk3,dusp7,irak2,arl6ip5,psmd6,…	1.83028
299	0.0154047	GO:0007623	circadian rhythm	ppargc1a,mtnr1a,jund,klf9,gnaq,nfil3,prmt5,nrip1,id3,sfpq,pspc1,egr1,nampt,suv39h2,sin3a,rora,gfpt1,cry2,lgr4,zfhx3,jun,ep300,hebp1,bhlhe40,ppp1cb,hdac2,id2,id4,tnfrsf11a,ezh2,egfr,nr1d2,ncoa2,klf10,pten,cdk1,sirt1,per3,dbp,ogt,ntrk1,srebf1,ahcy,tp53,sik1,oprl1	1.81235
300	0.0158402	GO:0048468	cell development	eif2ak3,wdr1,lyar,apbb2,hmgb2,mfsd8,spry1,sec24b,pitx2,slc9b2,eif4e,grid2,hmg20b,rfx2,jund,rab8a,epha5,ugcg,ptbp3,cep290,klf2,sh3gl2,klf4,ift74,ptprd,dmrt1,prmt5,tbx3,man2a1,crkl,mapk1,ulk1,rilpl1,sh2b3,xbp1,hsd17b4,sema6a,enc1,marveld2,nr2f1,plk2,nedd4l,atp8b1,onecut2,mex3c,rnf165,celf4,bace2,runx1,olig2,sod1,app,chodl,cxadr,pitpna,ift20,plxna2,wasf2,id3,rap1a,macf1,pabpc4,alcam,lims1,tnfsf11,km…	1.80024
301	0.0158825	GO:0030522	intracellular receptor signaling pathway	cyp26b1,uvssa,ppargc1a,crkl,ran,ncor2,nr2f1,runx1,nrip1,pdk3,arid1a,kmt2d,ptges3,trim24,cnot2,rora,nr2f2,smarca4,calr,traf6,cry2,esrra,ep300,rhoa,irak2,pim1,fshr,esr1,tp63,pum2,ezh2,ctnnb1,nr1d2,cyp7b1,sirt1,park7,dhrs3,nr1h2,ikbkg,ar,tspan6,foxa1,arnt,sec14l1,srebf1,nr4a2,pmepa1,dhx58,brca1,map2k6,ube2v1,ncoa6,ddx5,asxl2,nr1i2,rara,kctd6	1.79908
302	0.0167807	GO:0090150	establishment of protein localization to membrane	moap1,rab8a,cplx1,srp72,rilpl1,vps37b,clip1,golph3,rpl17,wrb,vps37d,ywhae,rabgef1,atp1b1,atg3,rps10,macf1,rpl23a,tfdp1,rps26,zdhhc20,hspa4,rpl18a,rab3ip,optn,csk,zdhhc12,fis1,micall1,gga1,rab3gap2,ppp3r1,rps12,tp63,ssr3,prkci,ywhaq,gorasp1,nmt1,egfr,sdcbp,tram1,ywhaz,rplp1,pex5,rpl22,rpl18,rps4x,zdhhc15,srp14,bmf,golph3l,get4,rpl23,e2f1,rpl7a,tram2,asna1,rpl10,agk,ssr2,tp53,pex26,rps13	1.77519
303	0.0170325	GO:0007165	signal transduction	avp,cyp26b1,eif2ak3,tnip2,fgfr3,uvssa,fgfrl1,moap1,htt,fgfbp1,msx1,wfs1,htra3,ppargc1a,rell1,apbb2,kdr,exoc1,cnot7,mtnr1a,acsl1,hmgb2,cpe,hhip,pgrmc2,spry1,bbs7,camk2d,aimp1,arhgef38,ube2d3,metap1,tspan5,grid2,snca,g3bp2,pias4,lpl,gng7,kiss1r,ptbp1,mknk2,csnk1g2,rab8a,epha5,ncbp1,dnajc25,ugcg,myo9b,cherp,ncln,tle2,sh3gl2,tmem38b,klf4,ift74,ptprd,dmrt1,gna14,gnaq,tle4,tle1,syk,rnf31,prmt5,rab2b,ch…	1.76872
304	0.0183533	GO:0043408	regulation of MAPK cascade	fgfr3,rell1,kdr,spry1,klf4,syk,prmt5,crkl,mapk1,fzd10,sh2b3,erp29,pebp1,sema6a,prdm15,sod1,app,taok1,map3k15,rap1a,tnfsf11,lrp1,foxo1,hmgb1,tnfrsf19,fgf9,pdgfd,timp3,ppp2ca,spry4,dusp1,rap1b,frs2,gpr37,csk,pde8a,dbnl,fgfr1,adam9,notch2,lgals9,traf6,fgf4,hipk3,kars,jun,gadd45a,prkcd,dag1,mapkapk3,dusp7,irak2,arl6ip5,aida,tgfb2,fshr,grm1,sox2,dlg1,pdcd10,epha4,pak2,ryk,kidins220,trib2,pbk,zmynd11,f…	1.73629
305	0.020391	GO:0051174	regulation of phosphorus metabolic process	avp,eif2ak3,fgfr3,uvssa,htt,ppargc1a,rell1,kdr,cnot7,acsl1,spry1,snca,ptbp1,ell,klf4,gnaq,syk,prmt5,mtmr3,tmem119,limk2,crkl,mapk1,fzd10,scarb1,sh2b3,erp29,tesc,pebp1,sema6a,ccnh,nnt,prlr,prdm15,sod1,app,taok1,pdk3,map3k15,ywhae,rabgef1,rap1a,syap1,cblb,ipo5,tnfsf11,acvr1b,erbb3,ptges3,lrp1,aaas,gpd1,wdfy2,foxo1,ccna1,hmgb1,tnfrsf19,fgf9,pdgfd,chordc1,sytl2,nup205,timp3,ppp2ca,hbegf,spry4,dusp1,d…	1.69056
306	0.0212597	GO:0010647	positive regulation of cell communication	tnip2,fgfr3,moap1,htt,fgfbp1,msx1,rell1,kdr,aimp1,tspan5,snca,g3bp2,pias4,ptbp1,csnk1g2,cherp,syk,rnf31,prmt5,crkl,mapk1,fzd10,sh2b3,erp29,xbp1,depdc1b,plk2,prlr,c1qtnf3,golph3,mbd2,c18orf32,smad2,rnf165,prdm15,sod1,app,taok1,hic1,casp1,map3k15,ywhae,sfpq,lamtor5,elf3,rap1a,rhoc,ldlrap1,macf1,lims1,tfdp1,tnfsf11,acvr1b,kmt2d,cd63,erbb3,lrp1,hmgb1,tnfrsf19,fgf9,pdgfd,timp3,maml1,hbegf,drd1,msx2,ra…	1.67244
307	0.0213391	GO:0070647	protein modification by small protein conjugation or removal	tnip2,uvssa,fbxl5,wfs1,lonrf1,usp38,ube2d3,herc6,pias4,hmg20b,rnf31,usp30,chfr,suds3,lztr1,enc1,arrdc3,lnpep,rnf180,nedd4l,smad2,rnf165,ltn1,usp25,trim33,atg3,rnf19b,rnft1,cblb,cul4a,tpp2,wdr61,aaas,ccna1,nup205,trim24,rnf145,jade2,egr1,usp8,arrdc4,kctd9,rnf181,nup133,keap1,rnf167,traf6,trim44,ddb2,rfwd3,syvn1,herpud1,usp10,cdc20,rnf11,cdc73,ep300,usp4,rhoa,ruvbl1,uba3,psmd6,sde2,dtl,ubr2,epas1,s…	1.67082
308	0.0217255	GO:0000077	DNA damage checkpoint	cnot7,plk2,donson,taok1,rpa2,tfdp1,cul4a,rhno1,cnot8,cnot2,e2f7,rint1,tipin,ccnd1,rfwd3,e2f4,gadd45a,ep300,atrip,dtl,gigyf2,cdc5l,wac,sox4,cdk1,prmt1,foxo4,foxn3,plk1,cdk5rap3,brca1,e2f1,znf830,e2f8,tp53	1.66303
309	0.0218586	GO:0031570	DNA integrity checkpoint	cnot7,plk2,donson,taok1,rpa2,tfdp1,cul4a,rhno1,cnot8,cnot2,e2f7,rint1,ticrr,tipin,ccnd1,rfwd3,e2f4,cdt1,gadd45a,ep300,atrip,dtl,gigyf2,cdc5l,wac,sox4,cdk1,prmt1,foxo4,foxn3,plk1,cdk5rap3,brca1,e2f1,znf830,e2f8,tp53	1.66038
310	0.0221669	GO:0060706	cell differentiation involved in embryonic placenta development	plk4,krt8,e2f7,nr2f2,dnajb6,eomes,stk3,grhl2,spint2,stk4,snai1,e2f8	1.6543
311	0.022904	GO:0048729	tissue morphogenesis	wdr1,msx1,hhip,spry1,bbs7,sec24b,fras1,cep290,klf4,gcnt1,tbx3,adamts12,smad2,ripk4,ift20,arid1a,grhl3,rhoc,gpc6,tulp3,hbegf,msx2,ntn4,frs2,sema3c,gcnt3,fgfr1,adm,ext2,traf6,wt1,lin7c,lgr4,ap2a2,cfl1,lrp5,irx3,wls,dag1,rhoa,plxnd1,psmd6,tgfb2,six2,esr1,dlg1,tp63,pdcd10,epha4,ryk,sox11,nos3,wnt3a,nrp1,itgb1,sox4,irx2,id4,foxq1,foxc1,egfr,ctnnb1,eomes,tfap2a,edn1,cyp7b1,hey1,stk3,rspo2,grhl2,col14a1…	1.64009
312	0.0232918	GO:0043085	positive regulation of catalytic activity	eif2ak3,fgfr3,acsl1,hmgb2,tbc1d9,snca,myo9b,klf4,rfk,gnaq,syk,git2,crkl,mapk1,fzd10,scarb1,erp29,rfc5,msh3,arrdc3,depdc1b,snx18,prlr,arhgap31,sod1,app,taok1,tax1bp3,casp1,map3k15,grhl3,atp1b1,rap1a,rhoc,syap1,lims1,rp2,grtp1,tnfsf11,erbb3,ptges3,racgap1,rfc3,hmgb1,pdgfd,stim1,nmur2,ppp2ca,arhgap26,egr1,frs2,cct2,pot1,mapk12,tbc1d22a,gramd4,tbc1d2b,csk,arrdc4,dbnl,elmod3,tnfrsf10b,fgfr1,adam9,evi5…	1.6328
313	0.0241182	GO:0072659	protein localization to plasma membrane	tspan5,rab8a,rilpl1,tesc,golph3,flot2,ift20,atp1b1,rap1a,ldlrap1,macf1,lrp1,sytl2,optn,anxa2,csk,tmem150a,vamp8,ikbkb,rab3d,crb3,ppfia1,pkp3,cdh1,gga1,ppp2r5a,ttc7a,dlg1,prkci,wnt3a,gorasp1,dpp6,itgb1,kif5b,egfr,cdh2,tnfrsf1a,scn3b,rer1,prkcz,wnk3,ar,ttc7b,ankrd9,lgals3,numb,mpp5,golph3l,pdpk1,emp2,jup,pkp2,dpp10,slmap	1.61765
314	0.026178	GO:0019220	regulation of phosphate metabolic process	avp,eif2ak3,fgfr3,uvssa,htt,ppargc1a,rell1,kdr,cnot7,acsl1,spry1,snca,ptbp1,ell,klf4,gnaq,syk,prmt5,mtmr3,tmem119,limk2,crkl,mapk1,fzd10,scarb1,sh2b3,erp29,tesc,pebp1,sema6a,ccnh,nnt,prlr,prdm15,sod1,app,taok1,pdk3,map3k15,ywhae,rabgef1,rap1a,syap1,cblb,ipo5,tnfsf11,acvr1b,erbb3,ptges3,lrp1,aaas,gpd1,wdfy2,foxo1,ccna1,hmgb1,tnfrsf19,fgf9,pdgfd,chordc1,sytl2,nup205,timp3,ppp2ca,hbegf,spry4,dusp1,d…	1.58206
315	0.0270826	GO:0042127	regulation of cell population proliferation	avp,mxd4,fgfr3,ctbp1,fgfrl1,fgfbp1,msx1,ppargc1a,kdr,cnot7,hmgb2,spry1,nudt6,aimp1,cherp,klf4,ift74,klf9,syk,tmem119,tbx3,crkl,mapk1,sh2b3,tesc,xbp1,c18orf54,mbd2,smad2,morc3,app,btg3,tax1bp3,mnt,arg2,tbrg1,ifnlr1,hipk1,cask,ldlrap1,rbbp4,ppm1d,tfdp1,cul4a,ing1,kmt2d,erbb3,sp1,foxo1,hmgb1,atp8a2,fgf9,pdgfd,acer3,trim24,cnot8,hbegf,irf1,dusp1,msx2,egr1,chst11,btg1,frs2,e2f7,pawr,nampt,anxa2,csk,zn…	1.56731
316	0.0285712	GO:0044774	mitotic DNA integrity checkpoint	cnot7,plk2,donson,taok1,rpa2,tfdp1,cnot8,cnot2,e2f7,rint1,ticrr,tipin,ccnd1,rfwd3,e2f4,gadd45a,ep300,gigyf2,sox4,cdk1,prmt1,foxo4,foxn3,cdk5rap3,e2f1,znf830,e2f8,tp53	1.54407
317	0.0302597	GO:0072331	signal transduction by p53 class mediator	msx1,cnot7,prmt5,rfc5,jmy,plk2,hic1,rpa2,hipk1,rbbp4,ppm1d,tfdp1,rfc3,trim24,rhno1,cnot8,cnot2,e2f7,kat6a,aurkb,chd3,csnk2a2,e2f4,usp10,banp,gadd45a,prmt6,ep300,atrip,brpf1,hdac2,tp63,sox4,rrs1,rrm2b,cdk1,sirt1,chd4,prmt1,taf1,rps6ka6,ppp1r13l,spred1,taf4,rpl23,cdk5rap3,brca1,snai1,e2f1,phf20,ddx5,e2f8,tp53,cdip1	1.51914
318	0.030635	GO:0071559	response to transforming growth factor beta	htra3,ppargc1a,crkl,onecut2,smad2,nlk,trim33,lims1,acvr1b,smad9,pdgfd,chst11,furin,znf703,smad6,adam9,dnm2,glg1,zfhx3,jun,ep300,rhoa,tgfb2,zfp36l2,fermt1,hdac2,skil,sox11,zeb1,bambi,edn1,yes1,sdcbp,htra1,fgfr2,got1,sirt1,gdf10,ski,prkcz,bcl9l,fos,snx6,crebbp,pdpk1,dlx1,acvr2a,pmepa1,cgn,tp53,sox6,emilin1	1.51378
319	0.0318631	GO:0001501	skeletal system development	cyp26b1,eif2ak3,fgfr3,fgfrl1,msx1,hhip,pitx2,slc9b2,tmem38b,znf219,tmem119,tbx3,sh2b3,cmklr1,ptger4,adamts12,mex3c,smad2,ets2,wasf2,spns2,tnfsf11,fgf9,tulp3,pitx1,msx2,chst11,anxa2,chsy1,fgfr1,notch2,fgf4,acp2,glg1,esrra,lrp5,ep300,rhoa,poc1a,tgfb2,six2,meis1,pex7,col19a1,dlg1,tp63,tiparp,ryk,sox11,wnt9a,csrnp1,insig1,wdr60,zeb1,sox4,hoxa10,foxc1,ctnnb1,tfap2a,edn1,osr2,rspo2,grhl2,tnfrsf11b,col1…	1.49671
320	0.0325539	GO:0071560	cellular response to transforming growth factor beta stimulus	htra3,ppargc1a,crkl,onecut2,smad2,nlk,trim33,lims1,acvr1b,smad9,pdgfd,chst11,furin,znf703,smad6,adam9,dnm2,glg1,jun,ep300,rhoa,tgfb2,zfp36l2,fermt1,hdac2,skil,sox11,zeb1,bambi,edn1,yes1,sdcbp,htra1,fgfr2,got1,sirt1,gdf10,ski,prkcz,bcl9l,fos,snx6,crebbp,pdpk1,dlx1,acvr2a,pmepa1,cgn,tp53,sox6,emilin1	1.4874
321	0.0335011	GO:0016071	mRNA metabolic process	slbp,dhx15,ppargc1a,cnot7,rbm46,plrg1,mex3d,ptbp1,lsm4,ncbp1,ptbp3,cherp,psip1,prmt5,dcp2,pus1,tnpo1,ccnh,ttc37,srek1,paip1,ctif,rpl17,celf4,app,zrsr2,pnrc2,sfpq,rps10,pabpc4,rpl23a,mbnl2,wbp4,zc3h13,wdr61,rps26,etf1,cnot8,ppp2ca,zmat2,hnrnpa0,hnrnph1,rbm27,ddx41,rpl18a,cnot2,sltm,snrnp27,anp32a,akap8l,ddx39a,hipk3,pkp3,tut1,znf326,cdc73,cebpg,apobec4,prkcd,usp4,rbm15b,lsm3,psmd6,zfp36l2,snrpb2,r…	1.47494
322	0.0343937	GO:1901653	cellular response to peptide	klf3,lpl,rab8a,klf2,klf4,pck2,xbp1,prlr,brwd1,app,syap1,lrp1,sp1,foxo1,sesn3,atp6v0e1,rap1b,nampt,csk,fis1,esrra,bcar1,cyba,leprot,atp6v0b,prkcd,prkar2a,arid1b,prkci,irs1,epha4,klf11,lpin1,cdc5l,kat2b,edn1,lpin2,atp6v1h,lyn,klf10,pten,got1,sirt1,prkcz,gsk3a,atp6v1g1,ogt,foxo4,srsf5,snx6,atp6v1d,max,insrr,srebf1,prkcb,baiap2l1,pdpk1,stat1,nfe2l2,grb14,nr4a2,pck1,rpl23,ncoa5,grb2,smarcc1,chmp5,ucp2…	1.46352
323	0.0347125	GO:0072175	epithelial tube formation	sec24b,cep290,arid1a,grhl3,tulp3,adm,traf6,cfl1,irx3,tgfb2,sox11,sox4,irx2,ctnnb1,stk3,grhl2,fgfr2,mthfr,ski,med12,spint2,bmp4,hif1a,six4,vangl2,lrp2,zeb2,wnt6,stk4,lhx2,rara,fzd3,hesx1	1.45951
324	0.0348192	GO:0007389	pattern specification process	cyp26b1,msx1,hhip,spry1,bbs7,pitx2,ift74,tbx3,crkl,smad2,ets2,plxna2,grhl3,hipk1,gpr161,acvr1b,eed,tulp3,msx2,frs2,sema3c,nr2f2,chsy1,pcsk6,smad6,fgfr1,wt1,lrp5,irx3,wls,dmrta2,ep300,sema3f,bhlhe40,aida,six2,otx1,tp63,wnt3a,xrcc2,nrp1,zeb1,hoxa10,irx2,sp8,foxc1,ctnnb1,eomes,edn1,asph,hey1,arc,fgfr2,hes4,ski,ar,med12,syngap1,pbx2,bmp4,hif1a,foxa1,vangl2,dlx2,dlx1,lrp2,ttc21b,acvr2a,zeb2,wnt6,ihh,s…	1.45818
325	0.0349331	GO:0001932	regulation of protein phosphorylation	avp,eif2ak3,fgfr3,uvssa,htt,ppargc1a,rell1,kdr,cnot7,acsl1,spry1,snca,klf4,gnaq,syk,prmt5,tmem119,crkl,mapk1,fzd10,sh2b3,erp29,tesc,pebp1,sema6a,ccnh,nnt,prlr,prdm15,sod1,app,taok1,map3k15,rabgef1,rap1a,syap1,cblb,ipo5,tnfsf11,acvr1b,erbb3,lrp1,wdfy2,foxo1,ccna1,hmgb1,tnfrsf19,fgf9,pdgfd,chordc1,timp3,ppp2ca,hbegf,spry4,dusp1,drd1,egr1,rap1b,frs2,gpr37,anxa2,csk,pde8a,nr2f2,dbnl,smad6,tnfrsf10b,f…	1.45676
326	0.0359511	GO:0044783	G1 DNA damage checkpoint	cnot7,plk2,rpa2,tfdp1,cnot8,cnot2,e2f7,ccnd1,rfwd3,e2f4,gadd45a,ep300,gigyf2,wac,sox4,cdk1,prmt1,e2f1,e2f8,tp53	1.44429
327	0.0370841	GO:0051098	regulation of binding	msx1,hmgb2,ncbp1,mau2,klf4,ran,plk2,mbd2,smad2,app,id3,epb41,gpsm1,ldlrap1,syap1,tnfsf11,lrp1,hmgb1,ppp2ca,csnk1a1,msx2,sin3a,anxa2,aurkb,traf6,aktip,mark2,cdt1,ptprf,jun,cebpg,ep300,eif3d,prkcd,plxnd1,nvl,aida,hdac2,epha4,sox11,id2,wnt3a,nrp1,bambi,id4,foxc1,ctnnb1,plcl2,hey1,stk3,eif3e,cdc42,park7,ski,edf1,fam129b,taf1,fmr1,bmp4,lgals3,pkd1,plk1,dnajb2,stk4,e2f1,lhx2,rara,traf2,ralb,derl1	1.43081
328	0.0372246	GO:0007507	heart development	fgfrl1,msx1,cpe,spry1,bbs7,sec24b,pitx2,ift74,tbx3,crkl,mapk1,col4a3bp,mbd2,smad2,cxadr,ift20,arid1a,id3,erbb3,fgf9,tenm4,maml1,msx2,frs2,sema3c,anxa2,mef2a,smad6,fgfr1,notch2,dnm2,calr,ephb4,adm,wt1,jun,cacybp,ep300,plxnd1,pim1,adamts9,tgfb2,rtn4,meis1,sox11,id2,nos3,wnt3a,nrp1,itgb1,nfatc1,ctdp1,sox4,rbm24,foxc1,egfr,ctnnb1,eomes,kat2b,edn1,zbtb14,dsg2,rb1cc1,hey1,stk3,grhl2,tnfrsf1a,pten,cdk1,…	1.42917
329	0.0387128	GO:0051640	organelle localization	htt,scfd2,cep135,plk4,spry1,bbs7,sec24b,snca,rab8a,cep290,syk,ran,sema6a,lman1,haus1,chmp2b,gosr1,ywhae,ift20,rabgef1,plxna2,mis12,myo7a,sytl2,spdl1,cep83,rab3ip,wasl,cep41,grinl1a,mef2a,vamp8,tmem230,spg11,ap3m2,dnm2,dock7,lgals9,rab3d,trappc1,ppp6r3,mark2,stx5,cdt1,cdh3,stx6,myh9,arl8b,cenpf,mcfd2,rab1a,stx11,ltv1,dlg1,pdcd10,cul3,gorasp1,kif5b,akap9,vps4b,ctnnb1,cdh2,lyn,ubxn2b,rrs1,ywhaz,pten…	1.41215
330	0.0393734	GO:0045862	positive regulation of proteolysis	eif2ak3,bbs7,snca,syk,chfr,rnf180,plk2,app,casp1,timm17a,rnf19b,rnft1,hmgb1,csnk1a1,mapk12,gramd4,snx33,furin,tnfrsf10b,adam9,keap1,lgals9,fis1,pacsin3,ctsd,herpud1,kars,myh9,rhoa,arl6ip5,socs5,hdac2,rhbdd1,epha4,rnf144a,trib2,wnt3a,cycs,dap,rnf144b,lyn,asph,rnf19a,trib1,fas,pten,sirt1,gsk3a,rcn3,trim32,ogt,taf1,fmr1,apopt1,egln3,plk1,zfand2a,nfe2l2,dnajb2,adrm1,grn,sumo2,sox7,mbp,grin1,bcl2l13,t…	1.4048
331	0.0411591	GO:0034975	protein folding in endoplasmic reticulum	emc6,canx,hsp90b1,pdia3,calr,emc3,emc2,pdia2,emc1	1.38553
332	0.0414405	GO:0008610	lipid biosynthetic process	avp,ppargc1a,acsl1,msmo1,etnppl,lpl,csnk1g2,isyna1,ugcg,tmem38b,sptlc1,pck2,lpcat4,mtmr3,ran,scarb1,xbp1,hsd17b4,col4a3bp,acot12,prlr,amacr,mtmr12,st8sia3,baat,lipg,acaa2,sod1,liph,pigl,pitpnm3,nfyc,arf3,ptges3,pip4k2c,sp1,gpd1,aasdhppt,acer3,egr1,cyp1a1,stard7,cds2,ldlr,pld2,adm,ptdss2,fa2h,csnk2a2,elovl1,dhcr24,gfi1,srebf2,pla2g6,prkcd,mtmr14,acbd3,degs1,lpgat1,gnpat,srd5a2,acss1,arv1,qki,ggps1…	1.38258
333	0.0414405	GO:0051090	regulation of DNA-binding transcription factor activity	wfs1,ppargc1a,neurog2,g3bp2,pias4,epha5,klf4,syk,rnf31,mapk1,cmklr1,jmy,ripk4,app,flot2,id3,rab7b,tnfsf11,rhebl1,crebzf,msx2,crtc3,ikbkb,keap1,smarca4,lgals9,traf6,sigirr,cth,jun,gfi1,cebpg,ep300,bhlhe40,irak2,pim1,sgk1,esr1,hdac2,hmgn3,prkci,id2,wnt3a,tax1bp1,dap,tnfrsf11a,ezh2,ctnnb1,eomes,edn1,stk3,trib1,pten,rtkn2,fank1,trim8,sirt1,park7,prkcz,ikbkg,trim32,ar,taf1,fos,sav1,foxa1,ntrk1,pkd1,pr…	1.38258
334	0.0415337	GO:0043401	steroid hormone mediated signaling pathway	uvssa,ppargc1a,pgrmc2,ran,ncor2,nr2f1,runx1,nrip1,arid1a,kmt2d,ptges3,cnot2,rora,nr2f2,smarca4,calr,cry2,esrra,ep300,rhoa,nr2c2,fshr,esr1,tp63,ctnnb1,nr1d2,cyp7b1,sirt1,park7,nr1h2,ar,bmp4,foxa1,nr4a2,pmepa1,brca1,ncoa6,ddx5,nr1i2,rara,kctd6	1.3816
335	0.0419307	GO:0060411	cardiac septum morphogenesis	fgfrl1,tbx3,msx2,sema3c,smad6,notch2,tgfb2,sox11,id2,nos3,nrp1,sox4,hey1,fgfr2,dhrs3,sav1,bmp4,vangl2,lrp2,rara,tp53,rbpj	1.37747
336	0.044211	GO:0042325	regulation of phosphorylation	avp,eif2ak3,fgfr3,uvssa,htt,ppargc1a,rell1,kdr,cnot7,acsl1,spry1,snca,klf4,gnaq,syk,prmt5,tmem119,limk2,crkl,mapk1,fzd10,sh2b3,erp29,tesc,pebp1,sema6a,ccnh,nnt,prlr,prdm15,sod1,app,taok1,map3k15,rabgef1,rap1a,syap1,cblb,ipo5,tnfsf11,acvr1b,erbb3,ptges3,lrp1,aaas,gpd1,wdfy2,foxo1,ccna1,hmgb1,tnfrsf19,fgf9,pdgfd,chordc1,nup205,timp3,ppp2ca,hbegf,spry4,dusp1,drd1,egr1,rap1b,frs2,gpr37,anxa2,csk,pde8…	1.35447
337	0.0458031	GO:0048646	anatomical structure formation involved in morphogenesis	eif2ak3,fgfbp1,wdr1,msx1,kdr,rbm46,spry1,sec24b,aimp1,grid2,angptl4,rfx2,cep290,klf2,hopx,klf4,syk,znf219,tbx3,mapk1,xbp1,sema6a,plk2,atp8b1,smad2,ptgfrn,ets2,runx1,plxna2,arid1a,wasf2,grhl3,hipk1,sp1,krt8,foxo1,atp8a2,fgf9,tenm4,stim1,tulp3,msx2,btg1,frs2,cnot2,e2f7,sema3c,anxa2,rora,tmod3,mef2a,fgfr1,adam9,ephb4,adm,ext2,traf6,wt1,cfl1,irx3,cbln1,jun,jak1,wls,cdc73,myh9,ep300,dag1,rhoa,plxnd1,p…	1.33911
338	0.0491647	GO:0030900	forebrain development	tacc3,msx1,ppargc1a,pitx2,epha5,tbx3,crkl,olig2,app,ywhae,arid1a,lrp1,pitx1,drd1,frs2,slc38a2,nr2f2,fgfr1,dnajb1,dock7,csnk2a2,phlpp2,cdh1,dmrta2,rhoa,rtn4,btbd3,otx1,pou3f2,sox2,fbxo45,ryk,id2,wnt3a,nrp1,kif5b,sall3,id4,ezh2,cntnap2,egfr,ctnnb1,eomes,cdh2,c12orf57,pex5,pten,fgfr2,cxcl12,ski,hprt1,bmp4,hif1a,numb,dlx2,dlx1,lrp2,ttc21b,nr4a2,zeb2,hap1,e2f1,lhx2,aqp1,srf,grin1,kcnc1,rara,emx2,rbpj,…	1.30835

## Sheet: Supp Table 1e
6hpa gene ontology results
	p_value	term_id	term_name	intersection	logp
1	2.54882e-10	GO:0030182	neuron differentiation	ptpra,lzts3,grid2,rest,dapk3,sh3gl2,foxd1,nedd4l,epha6,auts2,neurod4,dhfr,gata3,smo,adm,bdnf,nkd1,sall1,gfi1,cntn4,fshr,rtn4,btbd3,nkx2-2,bcl11a,dynlt1,kidins220,sall3,inhba,cdh2,prex2,gdf6,asap1,dkk1,pax2,l1cam,nkx2-1,wnt6,nog,ndel1,gfra4,jak2,dmrt3,fzd10,sema6a,enc1,nlgn4x,plxna2,srgap2,stk24,rap2a,smarcc2,nek3,postn,hmgb1,tenm4,wnt11,ptn,gabrb2,lep,bbs4,adam10,tcf12,mapk6,ogdh,map2k1,dvl2,cfl1…	9.59366
2	3.51964e-10	GO:0022008	neurogenesis	ptpra,lzts3,grid2,rest,dapk3,sh3gl2,foxd1,nedd4l,epha6,auts2,neurod4,dhfr,gata3,smo,adm,bdnf,nkd1,sall1,astn1,gfi1,cntn4,fshr,rtn4,btbd3,nkx2-2,bcl11a,dynlt1,kidins220,sall3,inhba,cdh2,prex2,gdf6,asap1,dkk1,pax2,barhl1,l1cam,nkx2-1,wnt6,nog,ndel1,nav2,xrcc5,gfra4,wdr1,kit,jak2,dmrt3,fzd10,sema6a,enc1,nlgn4x,plxna2,pou3f1,srgap2,stk24,rap2a,smarcc2,nek3,postn,hmgb1,tenm4,wnt11,ptn,cd9,gabrb2,lep,b…	9.4535
3	1.88858e-09	GO:0048699	generation of neurons	ptpra,lzts3,grid2,rest,dapk3,sh3gl2,foxd1,nedd4l,epha6,auts2,neurod4,dhfr,gata3,smo,adm,bdnf,nkd1,sall1,astn1,gfi1,cntn4,fshr,rtn4,btbd3,nkx2-2,bcl11a,dynlt1,kidins220,sall3,inhba,cdh2,prex2,gdf6,asap1,dkk1,pax2,barhl1,l1cam,nkx2-1,wnt6,nog,ndel1,xrcc5,gfra4,wdr1,kit,jak2,dmrt3,fzd10,sema6a,enc1,nlgn4x,plxna2,srgap2,stk24,rap2a,smarcc2,nek3,postn,hmgb1,tenm4,wnt11,ptn,gabrb2,lep,bbs4,adam10,tcf12…	8.72386
4	9.58967e-08	GO:0007399	nervous system development	ptpra,lzts3,cc2d2a,ednra,grid2,rest,dapk3,sh3gl2,sez6l,serinc5,foxd1,nedd4l,epha6,auts2,neurod4,fgf9,chrm2,dhfr,gata3,smo,adm,bdnf,nkd1,sall1,astn1,ptbp2,gfi1,cntn4,fshr,rtn4,btbd3,nkx2-2,bcl11a,syndig1,dynlt1,kidins220,sall3,foxc1,inhba,cdh2,prex2,sulf1,gdf6,asap1,dkk1,pax2,barhl1,l1cam,nkx2-1,wnt6,ca10,nog,ndel1,nav2,xrcc5,nell1,gfra4,wdr1,ppargc1a,kit,jak2,dmrt3,fbxl17,fzd10,sema6a,enc1,oxct1,…	7.0182
5	3.98662e-07	GO:0048666	neuron development	ptpra,lzts3,grid2,sh3gl2,foxd1,nedd4l,epha6,auts2,neurod4,dhfr,gata3,smo,adm,bdnf,gfi1,cntn4,fshr,rtn4,btbd3,bcl11a,dynlt1,kidins220,sall3,cdh2,prex2,asap1,dkk1,pax2,l1cam,nkx2-1,nog,ndel1,gfra4,jak2,sema6a,enc1,plxna2,srgap2,stk24,rap2a,nek3,postn,hmgb1,tenm4,ptn,gabrb2,lep,bbs4,adam10,mapk6,ogdh,map2k1,dvl2,cfl1,nrn1l,cdh11,negr1,lhx4,sgk1,strn,fez2,nyap2,pik3cb,id2,tnfrsf21,en2,etv1,mylip,neur…	6.39939
6	6.46715e-07	GO:0048522	positive regulation of cellular process	tex261,nkx1-1,nkx3-2,tlr3,camk2d,h2afz,grid2,odam,rest,dapk3,mapk10,sh3gl2,dmrt2,tpcn1,pla2g1b,foxd1,c1qtnf3,golph3,nedd4l,ets2,nfya,itpr3,auts2,neurod4,hoxc4,fgf9,kitlg,irak4,pot1,gata3,smo,onecut1,shc4,whamm,olfm2,ctc1,pth,adm,bdnf,fosl1,nkd1,sall1,atmin,banp,plk3,gfi1,nos1ap,hyal1,fshr,rtn4,nkx2-2,syndig1,eif2ak2,dynlt1,stag1,kidins220,osr1,pth1r,skap2,sirt6,foxc1,inhba,adtrp,cdh2,sulf1,gdf6,m…	6.18929
7	1.71702e-06	GO:0045935	positive regulation of nucleobase-containing compound metabolic process	nkx1-1,nkx3-2,tlr3,h2afz,rest,dmrt2,pla2g1b,foxd1,ets2,nfya,auts2,hoxc4,pot1,gata3,smo,onecut1,pth,fosl1,sall1,atmin,banp,gfi1,nkx2-2,stag1,osr1,sirt6,foxc1,inhba,gdf6,pax2,camta1,barhl1,nkx2-1,stat1,wnt6,mllt6,nog,snai1,eya2,tfap2c,junb,rxra,xrcc5,ppargc1a,naf1,tet2,rfx3,mapkapk5,znf131,fbxo4,pias2,vezf1,arid1a,gpatch3,pou3f1,ago1,nr4a1,smarcc2,ikzf4,hoxc13,hmgb1,nox4,wnt11,tmem173,mcrs1,tcf12,n…	5.76522
8	1.73906e-06	GO:0009653	anatomical structure morphogenesis	ptpra,lzts3,cc2d2a,nkx3-2,fgl1,tlr3,npy1r,ednra,grid2,odam,dapk3,sh3gl2,dmrt2,foxd1,nedd4l,ets2,epha6,auts2,hoxc4,krt18,fgf9,gata3,strip2,smo,wdr72,onecut1,mfge8,adm,bdnf,tnnt3,nkd1,sall1,hyal1,cntn4,rtn4,btbd3,bcl11a,dynlt1,col21a1,kidins220,osr1,myl3,sall3,sirt6,foxc1,inhba,adtrp,cdh2,prex2,sulf1,crispld1,dkk1,sh3pxd2a,pax2,l1cam,nkx2-1,stat1,hoxd11,rnd3,wnt6,nog,snai1,eya2,egfl7,junb,rxra,ndel…	5.75969
9	5.88646e-06	GO:0031175	neuron projection development	ptpra,lzts3,grid2,sh3gl2,foxd1,nedd4l,epha6,auts2,dhfr,gata3,smo,adm,bdnf,gfi1,cntn4,fshr,rtn4,btbd3,bcl11a,dynlt1,kidins220,cdh2,prex2,asap1,dkk1,pax2,l1cam,nkx2-1,nog,ndel1,gfra4,jak2,sema6a,enc1,plxna2,srgap2,stk24,rap2a,nek3,postn,hmgb1,ptn,bbs4,adam10,mapk6,map2k1,dvl2,cfl1,nrn1l,cdh11,negr1,lhx4,sgk1,strn,fez2,nyap2,pik3cb,tnfrsf21,etv1,mylip,neurog3,trim32,pak3,slitrk2,otx2,nfe2l2,cxcr4,sl…	5.23015
10	6.02769e-06	GO:0048518	positive regulation of biological process	tex261,nkx1-1,nkx3-2,tlr3,camk2d,h2afz,grid2,mmrn1,odam,rest,dapk3,mapk10,sh3gl2,dmrt2,tpcn1,pla2g1b,foxd1,c1qtnf3,golph3,nedd4l,cd247,ets2,nfya,itpr3,auts2,neurod4,hoxc4,fgf9,dhfr,kitlg,irak4,pot1,gata3,smo,onecut1,shc4,whamm,mfge8,olfm2,ctc1,pth,adm,bdnf,fosl1,nkd1,sall1,atmin,banp,plk3,gfi1,nos1ap,hyal1,fshr,rtn4,snx5,nkx2-2,bcl11a,syndig1,eif2ak2,dynlt1,stag1,kidins220,osr1,pth1r,skap2,sirt6,…	5.21985
11	6.89967e-06	GO:0031328	positive regulation of cellular biosynthetic process	nkx1-1,nkx3-2,tlr3,h2afz,rest,dmrt2,pla2g1b,foxd1,ets2,nfya,auts2,hoxc4,pot1,gata3,smo,onecut1,ctc1,pth,adm,fosl1,sall1,atmin,banp,gfi1,nos1ap,nkx2-2,stag1,osr1,pth1r,foxc1,inhba,gdf6,pax2,camta1,barhl1,nkx2-1,pemt,stat1,wnt6,mllt6,nog,snai1,tfap2c,junb,rxra,xrcc5,ppargc1a,naf1,tet2,jak2,rfx3,mapkapk5,znf131,fbxo4,pias2,vezf1,arid1a,gpatch3,pou3f1,ago1,nr4a1,smarcc2,ikzf4,larp4,hoxc13,hmgb1,nox4,…	5.16117
12	8.10513e-06	GO:0045893	positive regulation of transcription, DNA-templated	nkx1-1,nkx3-2,tlr3,h2afz,rest,dmrt2,pla2g1b,foxd1,ets2,nfya,auts2,hoxc4,gata3,smo,onecut1,pth,fosl1,sall1,atmin,banp,gfi1,nkx2-2,stag1,osr1,foxc1,inhba,gdf6,pax2,camta1,barhl1,nkx2-1,stat1,wnt6,mllt6,nog,snai1,tfap2c,junb,rxra,ppargc1a,tet2,rfx3,znf131,pias2,vezf1,arid1a,gpatch3,pou3f1,ago1,nr4a1,smarcc2,ikzf4,hoxc13,hmgb1,wnt11,tmem173,mcrs1,tcf12,nkx2-6,erlin2,map2k1,brd4,dvl2,znf423,tox3,foxd2…	5.09124
13	1.12787e-05	GO:0048869	cellular developmental process	ptpra,lzts3,nkx1-1,nkx3-2,tlr3,ednra,grid2,rest,dapk3,acer1,sh3gl2,tmem38b,hsd17b4,foxd1,c1qtnf3,nedd4l,ets2,epha6,auts2,neurod4,krt18,fgf9,dhfr,kitlg,ucma,gata3,strip2,smo,onecut1,slc24a5,shc4,olfm2,ctc1,pth,adm,bdnf,tnnt3,nkd1,sall1,astn1,gfi1,cntn4,fshr,rtn4,btbd3,nkx2-2,bcl11a,eif2ak2,dynlt1,col21a1,kidins220,osr1,pth1r,sall3,sirt6,foxc1,inhba,cdh2,prex2,sulf1,gdf6,asap1,dkk1,dmbt1,sh3pxd2a,p…	4.94774
14	1.17665e-05	GO:0010557	positive regulation of macromolecule biosynthetic process	nkx1-1,nkx3-2,tlr3,h2afz,rest,dmrt2,pla2g1b,foxd1,ets2,nfya,auts2,hoxc4,pot1,gata3,smo,onecut1,ctc1,pth,fosl1,sall1,atmin,banp,gfi1,nkx2-2,stag1,osr1,foxc1,inhba,gdf6,pax2,camta1,barhl1,nkx2-1,stat1,wnt6,mllt6,nog,snai1,tfap2c,junb,rxra,xrcc5,ppargc1a,naf1,tet2,jak2,rfx3,mapkapk5,znf131,fbxo4,pias2,vezf1,arid1a,gpatch3,pou3f1,ago1,nr4a1,smarcc2,ikzf4,larp4,hoxc13,hmgb1,nox4,wnt11,tmem173,mcrs1,cd…	4.92935
15	2.01112e-05	GO:0009891	positive regulation of biosynthetic process	nkx1-1,nkx3-2,tlr3,h2afz,rest,dmrt2,pla2g1b,foxd1,ets2,nfya,auts2,hoxc4,pot1,gata3,smo,onecut1,ctc1,pth,adm,fosl1,sall1,atmin,banp,gfi1,nos1ap,nkx2-2,stag1,osr1,pth1r,foxc1,inhba,gdf6,pax2,camta1,barhl1,nkx2-1,pemt,stat1,wnt6,mllt6,nog,snai1,tfap2c,junb,rxra,xrcc5,ppargc1a,naf1,tet2,jak2,rfx3,mapkapk5,znf131,fbxo4,pias2,vezf1,arid1a,gpatch3,pou3f1,ago1,nr4a1,smarcc2,ikzf4,larp4,hoxc13,hmgb1,nox4,…	4.69656
16	2.16478e-05	GO:0071840	cellular component organization or biogenesis	ptpra,lzts3,cc2d2a,afap1,clcn3,fhdc1,camk2d,cisd2,h2afz,grid2,odam,rest,dapk3,sin3b,igfbpl1,sh3gl2,tmem38b,psip1,tle4,golm1,oxa1l,trim36,c5orf30,sez6l,pla2g1b,ift81,sncaip,hsd17b4,foxd1,c1qtnf3,golph3,nedd4l,cd247,epha6,kcnd3,itpr3,auts2,krt18,vps36,chrm2,dhfr,poc1b,pot1,phyh,gata3,strip2,smo,rsl24d1,onecut1,whamm,mfge8,trappc1,ctc1,adm,bdnf,tnnt3,nudt19,fosl1,atmin,dynlrb2,banp,plk3,ptbp2,gfi1,n…	4.66459
17	2.24906e-05	GO:0016043	cellular component organization	ptpra,lzts3,cc2d2a,afap1,clcn3,fhdc1,camk2d,cisd2,h2afz,grid2,odam,rest,dapk3,sin3b,igfbpl1,sh3gl2,tmem38b,psip1,tle4,golm1,oxa1l,trim36,c5orf30,sez6l,pla2g1b,ift81,sncaip,hsd17b4,foxd1,c1qtnf3,golph3,nedd4l,cd247,epha6,kcnd3,itpr3,auts2,krt18,vps36,chrm2,dhfr,poc1b,pot1,phyh,gata3,strip2,smo,rsl24d1,onecut1,whamm,mfge8,trappc1,ctc1,adm,bdnf,tnnt3,nudt19,fosl1,atmin,dynlrb2,banp,plk3,ptbp2,gfi1,n…	4.648
18	3.57951e-05	GO:1903508	positive regulation of nucleic acid-templated transcription	nkx1-1,nkx3-2,tlr3,h2afz,rest,dmrt2,pla2g1b,foxd1,ets2,nfya,auts2,hoxc4,gata3,smo,onecut1,pth,fosl1,sall1,atmin,banp,gfi1,nkx2-2,stag1,osr1,foxc1,inhba,gdf6,pax2,camta1,barhl1,nkx2-1,stat1,wnt6,mllt6,nog,snai1,tfap2c,junb,rxra,ppargc1a,tet2,rfx3,znf131,pias2,vezf1,arid1a,gpatch3,pou3f1,ago1,nr4a1,smarcc2,ikzf4,hoxc13,hmgb1,wnt11,tmem173,mcrs1,tcf12,nkx2-6,erlin2,map2k1,brd4,dvl2,znf423,tox3,foxd2…	4.44618
19	3.69546e-05	GO:1902680	positive regulation of RNA biosynthetic process	nkx1-1,nkx3-2,tlr3,h2afz,rest,dmrt2,pla2g1b,foxd1,ets2,nfya,auts2,hoxc4,gata3,smo,onecut1,pth,fosl1,sall1,atmin,banp,gfi1,nkx2-2,stag1,osr1,foxc1,inhba,gdf6,pax2,camta1,barhl1,nkx2-1,stat1,wnt6,mllt6,nog,snai1,tfap2c,junb,rxra,ppargc1a,tet2,rfx3,znf131,pias2,vezf1,arid1a,gpatch3,pou3f1,ago1,nr4a1,smarcc2,ikzf4,hoxc13,hmgb1,wnt11,tmem173,mcrs1,tcf12,nkx2-6,erlin2,map2k1,brd4,dvl2,znf423,tox3,foxd2…	4.43233
20	4.47626e-05	GO:0032990	cell part morphogenesis	ptpra,lzts3,sh3gl2,foxd1,nedd4l,epha6,auts2,gata3,smo,bdnf,cntn4,rtn4,btbd3,bcl11a,dynlt1,kidins220,cdh2,prex2,pax2,l1cam,nkx2-1,nog,ndel1,gfra4,sema6a,plxna2,srgap2,stk24,rap2a,nek3,postn,ptn,adam10,map2k1,dvl2,cfl1,nrn1l,cdh11,lhx4,sgk1,fez2,nyap2,pik3cb,etv1,rreb1,neurog3,pak3,slitrk2,mtm1,opa3,otx2,cxcr4,olfm1,chrnb2,fzd3,efna1	4.34908
21	4.95978e-05	GO:0048523	negative regulation of cellular process	nkx3-2,fgl1,tlr3,camk2d,grid2,rest,dapk3,mapk10,sin3b,cers1,sh3gl2,tmem38b,tle4,tpcn1,c5orf30,tmem132d,znf608,foxd1,c1qtnf3,golph3,nedd4l,ets2,itpr3,krt18,fgf9,dhfr,kitlg,pot1,rint1,ucma,gata3,smo,onecut1,slc24a5,whamm,ctc1,pth,ipo7,adm,api5,bdnf,fosl1,nkd1,sall1,plk3,depdc1,ptbp2,gfi1,hyal1,cntn4,rtn4,snx5,nkx2-2,bcl11a,eif2ak2,dynlt1,osr1,pth1r,sall3,skap2,sirt6,foxc1,inhba,adtrp,cdh2,sulf1,mtb…	4.30454
22	6.92049e-05	GO:0009888	tissue development	cc2d2a,nkx3-2,ednra,odam,acer1,tmem38b,dmrt2,hsd17b4,foxd1,ets2,hoxc4,krt18,fgf9,kitlg,gata3,smo,wdr72,onecut1,ctc1,pth,adm,nkd1,sall1,hyal1,fshr,rtn4,nkx2-2,col21a1,osr1,pth1r,myl3,sirt6,foxc1,inhba,cdh2,sulf1,gdf6,dkk1,dmbt1,pax2,barhl1,nkx2-1,stat1,hoxd11,wnt6,nog,snai1,eya2,junb,rxra,nell1,wdr1,ppargc1a,jak2,rfx3,fbxl17,stx2,rilpl1,sema6a,oxct1,aqp3,plxna2,vezf1,arid1a,pou3f1,nr4a1,hoxc13,pos…	4.15986
23	7.255e-05	GO:0051254	positive regulation of RNA metabolic process	nkx1-1,nkx3-2,tlr3,h2afz,rest,dmrt2,pla2g1b,foxd1,ets2,nfya,auts2,hoxc4,gata3,smo,onecut1,pth,fosl1,sall1,atmin,banp,gfi1,nkx2-2,stag1,osr1,foxc1,inhba,gdf6,pax2,camta1,barhl1,nkx2-1,stat1,wnt6,mllt6,nog,snai1,tfap2c,junb,rxra,ppargc1a,tet2,rfx3,znf131,pias2,vezf1,arid1a,gpatch3,pou3f1,ago1,nr4a1,smarcc2,ikzf4,hoxc13,hmgb1,wnt11,tmem173,mcrs1,tcf12,nkx2-6,erlin2,map2k1,brd4,dvl2,znf423,tox3,foxd2…	4.13936
24	7.30975e-05	GO:0000902	cell morphogenesis	ptpra,lzts3,dapk3,sh3gl2,foxd1,nedd4l,epha6,auts2,gata3,strip2,smo,bdnf,cntn4,rtn4,btbd3,bcl11a,dynlt1,col21a1,kidins220,cdh2,prex2,dkk1,pax2,l1cam,nkx2-1,rnd3,nog,ndel1,eps8,gfra4,wdr1,kit,rilpl1,sema6a,brwd1,plxna2,srgap2,stk24,rap2a,larp4,nek3,postn,nox4,ptn,adam10,map2k1,dvl2,cfl1,nrn1l,cdh11,lhx4,prox1,sgk1,fez2,bcl6,nyap2,pik3cb,id2,fam84a,etv1,cdh10,cdh12,rreb1,neurog3,pak3,slitrk2,otx2,cx…	4.1361
25	8.87987e-05	GO:0120039	plasma membrane bounded cell projection morphogenesis	ptpra,lzts3,sh3gl2,foxd1,nedd4l,epha6,auts2,gata3,smo,bdnf,cntn4,rtn4,btbd3,bcl11a,dynlt1,kidins220,cdh2,prex2,pax2,l1cam,nkx2-1,nog,ndel1,gfra4,sema6a,plxna2,srgap2,stk24,rap2a,nek3,postn,ptn,adam10,map2k1,dvl2,cfl1,nrn1l,cdh11,lhx4,sgk1,fez2,nyap2,pik3cb,etv1,rreb1,neurog3,pak3,slitrk2,otx2,cxcr4,olfm1,chrnb2,fzd3,efna1	4.05159
26	9.99482e-05	GO:0032989	cellular component morphogenesis	ptpra,lzts3,dapk3,sh3gl2,foxd1,nedd4l,epha6,auts2,gata3,strip2,smo,bdnf,tnnt3,cntn4,rtn4,btbd3,bcl11a,dynlt1,col21a1,kidins220,cdh2,prex2,dkk1,pax2,l1cam,nkx2-1,rnd3,nog,ndel1,eps8,gfra4,wdr1,kit,rilpl1,sema6a,brwd1,plxna2,srgap2,stk24,rap2a,larp4,nek3,postn,nox4,tenm4,ptn,cd9,adam10,map2k1,dvl2,cfl1,nrn1l,cdh11,lhx4,prox1,sgk1,fez2,bcl6,nyap2,pik3cb,id2,fam84a,etv1,cdh10,cdh12,rreb1,neurog3,pak3…	4.00023
27	0.000108151	GO:0048858	cell projection morphogenesis	ptpra,lzts3,sh3gl2,foxd1,nedd4l,epha6,auts2,gata3,smo,bdnf,cntn4,rtn4,btbd3,bcl11a,dynlt1,kidins220,cdh2,prex2,pax2,l1cam,nkx2-1,nog,ndel1,gfra4,sema6a,plxna2,srgap2,stk24,rap2a,nek3,postn,ptn,adam10,map2k1,dvl2,cfl1,nrn1l,cdh11,lhx4,sgk1,fez2,nyap2,pik3cb,etv1,rreb1,neurog3,pak3,slitrk2,otx2,cxcr4,olfm1,chrnb2,fzd3,efna1	3.96597
28	0.000110374	GO:0048519	negative regulation of biological process	nkx3-2,fgl1,tlr3,camk2d,grid2,rest,dapk3,mapk10,sin3b,cers1,sh3gl2,tmem38b,tle4,oxa1l,tpcn1,c5orf30,tmem132d,znf608,foxd1,c1qtnf3,golph3,nedd4l,ets2,itpr3,krt18,fgf9,dhfr,kitlg,pot1,rint1,ucma,gata3,smo,onecut1,slc24a5,whamm,ctc1,pth,ipo7,adm,api5,bdnf,fosl1,nkd1,sall1,banp,plk3,depdc1,ptbp2,gfi1,hyal1,cntn4,fshr,rtn4,snx5,nkx2-2,bcl11a,eif2ak2,dynlt1,osr1,pth1r,sall3,skap2,sirt6,foxc1,inhba,adtr…	3.95713
29	0.000110399	GO:0048812	neuron projection morphogenesis	ptpra,lzts3,sh3gl2,foxd1,nedd4l,epha6,auts2,gata3,smo,bdnf,cntn4,rtn4,btbd3,bcl11a,dynlt1,kidins220,cdh2,prex2,pax2,l1cam,nkx2-1,nog,ndel1,gfra4,sema6a,plxna2,srgap2,stk24,rap2a,nek3,postn,ptn,adam10,map2k1,dvl2,cfl1,nrn1l,cdh11,lhx4,sgk1,fez2,nyap2,pik3cb,etv1,neurog3,pak3,slitrk2,otx2,cxcr4,olfm1,chrnb2,fzd3,efna1	3.95703
30	0.000111676	GO:0050793	regulation of developmental process	lzts3,nkx3-2,tlr3,npy1r,grid2,rest,dapk3,dmrt2,foxd1,nedd4l,neurod4,fgf9,kitlg,ucma,gata3,strip2,smo,olfm2,pth,adm,bdnf,nkd1,gfi1,hyal1,cntn4,fshr,rtn4,nkx2-2,bcl11a,syndig1,eif2ak2,dynlt1,kidins220,osr1,sirt6,foxc1,inhba,cdh2,sulf1,gdf6,asap1,dkk1,pax2,l1cam,nkx2-1,socs1,stat1,rnd3,wnt6,nog,snai1,rab14,junb,rxra,ndel1,eps8,xrcc5,suz12,dlk2,nell1,wdr1,ppargc1a,kit,jak2,rfx3,dmrt3,sema6a,enc1,aqp3…	3.95204
31	0.000113686	GO:0010628	positive regulation of gene expression	nkx1-1,nkx3-2,tlr3,h2afz,odam,rest,dmrt2,pla2g1b,foxd1,ets2,nfya,auts2,hoxc4,fgf9,gata3,smo,onecut1,pth,fosl1,sall1,atmin,banp,gfi1,nos1ap,nkx2-2,bcl11a,stag1,osr1,foxc1,inhba,adtrp,gdf6,dkk1,pax2,camta1,barhl1,nkx2-1,sf3b1,stat1,wnt6,mllt6,nog,snai1,tfap2c,junb,rxra,polr1a,ppargc1a,kit,tet2,rfx3,znf131,pias2,vezf1,arid1a,gpatch3,pou3f1,ago1,nr4a1,smarcc2,ikzf4,larp4,hoxc13,hmgb1,wnt11,h2afy,tmem…	3.94429
32	0.000141359	GO:0030154	cell differentiation	ptpra,lzts3,nkx1-1,nkx3-2,tlr3,ednra,grid2,rest,dapk3,acer1,sh3gl2,tmem38b,hsd17b4,foxd1,c1qtnf3,nedd4l,ets2,epha6,auts2,neurod4,krt18,fgf9,dhfr,kitlg,ucma,gata3,smo,onecut1,slc24a5,shc4,olfm2,pth,adm,bdnf,tnnt3,nkd1,sall1,astn1,gfi1,cntn4,fshr,rtn4,btbd3,nkx2-2,bcl11a,eif2ak2,dynlt1,col21a1,kidins220,osr1,pth1r,sall3,sirt6,foxc1,inhba,cdh2,prex2,sulf1,gdf6,asap1,dkk1,dmbt1,sh3pxd2a,pax2,barhl1,l…	3.84968
33	0.000154235	GO:0032502	developmental process	ptpra,lzts3,nkx1-1,cc2d2a,nkx3-2,fgl1,tlr3,clcn3,npy1r,ednra,cisd2,grid2,odam,rest,dapk3,acer1,sh3gl2,tmem38b,dmrt2,sez6l,hsd17b4,serinc5,foxd1,c1qtnf3,nedd4l,ets2,epha6,auts2,neurod4,hoxc4,krt18,fgf9,chrm2,dhfr,kitlg,ucma,gata3,strip2,smo,wdr72,onecut1,slc24a5,shc4,mfge8,olfm2,ctc1,pth,adm,bdnf,tnnt3,fosl1,nkd1,sall1,banp,astn1,ptbp2,gfi1,hyal1,cntn4,fshr,rtn4,btbd3,nkx2-2,bcl11a,syndig1,eif2ak2…	3.81182
34	0.00016093	GO:0007275	multicellular organism development	ptpra,lzts3,cc2d2a,nkx3-2,fgl1,tlr3,npy1r,ednra,cisd2,grid2,odam,rest,dapk3,acer1,sh3gl2,tmem38b,dmrt2,sez6l,hsd17b4,serinc5,foxd1,nedd4l,ets2,epha6,auts2,neurod4,hoxc4,krt18,fgf9,chrm2,dhfr,kitlg,gata3,smo,wdr72,onecut1,mfge8,ctc1,pth,adm,bdnf,fosl1,nkd1,sall1,banp,astn1,ptbp2,gfi1,hyal1,cntn4,fshr,rtn4,btbd3,nkx2-2,bcl11a,syndig1,eif2ak2,dynlt1,col21a1,kidins220,osr1,pth1r,myl3,sall3,sirt6,foxc…	3.79336
35	0.000189347	GO:0051173	positive regulation of nitrogen compound metabolic process	nkx1-1,nkx3-2,tlr3,h2afz,odam,rest,mapk10,dmrt2,pla2g1b,foxd1,nedd4l,ets2,nfya,auts2,hoxc4,fgf9,kitlg,pot1,gata3,smo,onecut1,pth,bdnf,fosl1,nkd1,sall1,atmin,banp,plk3,gfi1,nos1ap,fshr,nkx2-2,eif2ak2,stag1,kidins220,osr1,sirt6,foxc1,inhba,adtrp,cdh2,gdf6,dkk1,pax2,camta1,barhl1,nkx2-1,pemt,socs1,hspd1,stat1,bard1,wnt6,mllt6,nog,snai1,eya2,tfap2c,junb,rxra,xrcc5,cdc6,ppargc1a,kit,naf1,tet2,tmem259,…	3.72274
36	0.00019714	GO:0051094	positive regulation of developmental process	tlr3,grid2,rest,dmrt2,foxd1,nedd4l,neurod4,fgf9,kitlg,gata3,smo,olfm2,pth,adm,bdnf,hyal1,rtn4,nkx2-2,syndig1,dynlt1,kidins220,osr1,sirt6,foxc1,inhba,cdh2,gdf6,dkk1,pax2,l1cam,socs1,stat1,wnt6,nog,snai1,junb,ndel1,xrcc5,nell1,ppargc1a,kit,jak2,rfx3,sema6a,enc1,plxna2,vezf1,nfkbiz,hmgb1,pdgfd,tenm4,ptn,h2afy,adamts20,ccdc71l,lep,bbs4,tcf12,mapk6,znf703,map2k1,dvl2,irx3,negr1,cth,dmrta2,ptprc,prox1,…	3.70523
37	0.00020144	GO:0051239	regulation of multicellular organismal process	lzts3,nkx3-2,tlr3,npy1r,camk2d,grid2,rest,dapk3,tmem38b,dmrt2,c5orf30,foxd1,c1qtnf3,nedd4l,kcnd3,itpr3,fgf9,chrm2,kitlg,ucma,gata3,smo,pth,adm,bdnf,tnnt3,nkd1,gfi1,nos1ap,hyal1,cntn4,fshr,rtn4,snx5,nkx2-2,bcl11a,syndig1,eif2ak2,dynlt1,kidins220,osr1,myl3,sirt6,foxc1,inhba,adtrp,cdh2,sulf1,gdf6,asap1,dkk1,pax2,gbp5,atp2b3,l1cam,nkx2-1,sec14l1,pemt,socs1,gls,hspd1,stat1,wnt6,nog,snai1,rab14,rxra,nd…	3.69585
38	0.000217516	GO:0048731	system development	ptpra,lzts3,cc2d2a,nkx3-2,fgl1,tlr3,npy1r,ednra,grid2,odam,rest,dapk3,acer1,sh3gl2,tmem38b,dmrt2,sez6l,hsd17b4,serinc5,foxd1,nedd4l,ets2,epha6,auts2,neurod4,hoxc4,krt18,fgf9,chrm2,dhfr,kitlg,gata3,smo,wdr72,onecut1,mfge8,ctc1,pth,adm,bdnf,fosl1,nkd1,sall1,astn1,ptbp2,gfi1,hyal1,cntn4,fshr,rtn4,btbd3,nkx2-2,bcl11a,syndig1,eif2ak2,dynlt1,col21a1,kidins220,osr1,pth1r,myl3,sall3,sirt6,foxc1,inhba,adt…	3.66251
39	0.000241427	GO:0048856	anatomical structure development	ptpra,lzts3,cc2d2a,nkx3-2,fgl1,tlr3,npy1r,ednra,cisd2,grid2,odam,rest,dapk3,acer1,sh3gl2,tmem38b,dmrt2,sez6l,hsd17b4,serinc5,foxd1,nedd4l,ets2,epha6,auts2,neurod4,hoxc4,krt18,fgf9,chrm2,dhfr,kitlg,gata3,strip2,smo,wdr72,onecut1,mfge8,olfm2,ctc1,pth,adm,bdnf,tnnt3,fosl1,nkd1,sall1,banp,astn1,ptbp2,gfi1,hyal1,cntn4,fshr,rtn4,btbd3,nkx2-2,bcl11a,syndig1,eif2ak2,dynlt1,col21a1,kidins220,osr1,pth1r,my…	3.61721
40	0.000277257	GO:0010604	positive regulation of macromolecule metabolic process	nkx1-1,nkx3-2,tlr3,h2afz,odam,rest,mapk10,dmrt2,pla2g1b,foxd1,nedd4l,ets2,nfya,auts2,hoxc4,fgf9,kitlg,pot1,gata3,smo,onecut1,ctc1,pth,bdnf,fosl1,nkd1,sall1,atmin,banp,plk3,gfi1,nos1ap,fshr,nkx2-2,bcl11a,eif2ak2,stag1,kidins220,osr1,sirt6,foxc1,inhba,adtrp,cdh2,gdf6,dkk1,pax2,camta1,barhl1,nkx2-1,pemt,socs1,sf3b1,hspd1,stat1,bard1,wnt6,mllt6,nog,snai1,eya2,tfap2c,junb,rxra,xrcc5,cdc6,polr1a,ppargc…	3.55712
41	0.00036853	GO:0120036	plasma membrane bounded cell projection organization	ptpra,lzts3,cc2d2a,fhdc1,grid2,sh3gl2,c5orf30,ift81,foxd1,golph3,nedd4l,epha6,auts2,dhfr,poc1b,gata3,smo,onecut1,whamm,adm,bdnf,atmin,dynlrb2,gfi1,cntn4,fshr,rtn4,btbd3,bcl11a,dynlt1,kidins220,cdh2,prex2,asap1,dkk1,pax2,l1cam,nkx2-1,nog,ndel1,eps8,gfra4,kit,jak2,rfx3,rilpl1,sema6a,enc1,plxna2,srgap2,atg3,stk24,rap2a,ccdc65,nek3,postn,hmgb1,ptn,bbs4,adam10,mapk6,map2k1,dvl2,cfl1,nrn1l,cdh11,negr1,…	3.43353
42	0.000454493	GO:0048468	cell development	ptpra,lzts3,nkx3-2,ednra,grid2,rest,sh3gl2,hsd17b4,foxd1,nedd4l,epha6,auts2,neurod4,dhfr,kitlg,gata3,smo,onecut1,adm,bdnf,tnnt3,gfi1,cntn4,fshr,rtn4,btbd3,nkx2-2,bcl11a,dynlt1,col21a1,kidins220,osr1,pth1r,sall3,sirt6,foxc1,inhba,cdh2,prex2,sulf1,gdf6,asap1,dkk1,pax2,l1cam,diaph2,nkx2-1,nog,ndel1,xrcc5,gfra4,wdr1,kit,jak2,rfx3,rilpl1,sema6a,enc1,plxna2,vezf1,pou3f1,srgap2,stk24,rap2a,nek3,postn,hm…	3.34247
43	0.000595851	GO:0023051	regulation of signaling	ptpra,afap1,tlr3,gria2,camk2d,grid2,rest,dapk3,mapk10,sh3gl2,tle4,sez6l,pla2g1b,ift81,sncaip,foxd1,c1qtnf3,golph3,itpr3,auts2,fgf9,chrm2,arhgef37,kitlg,irak4,rint1,grm3,gata3,smo,onecut1,pth,adm,bdnf,nkd1,sall1,banp,plk3,gfi1,nos1ap,cntn4,fshr,rtn4,snx5,eif2ak2,dynlt1,kidins220,sall3,skap2,inhba,cdh2,prex2,sulf1,gdf6,ptp4a3,dkk1,hells,plekhg5,camta1,atp2b3,nkx2-1,sec14l1,sstr5,socs1,rmi2,stat1,ba…	3.22486
44	0.000641071	GO:0060322	head development	ednra,grid2,sez6l,fgf9,smo,sall1,ptbp2,cntn4,rtn4,btbd3,nkx2-2,sall3,foxc1,inhba,cdh2,crispld1,dkk1,pax2,barhl1,nkx2-1,ca10,nog,ndel1,xrcc5,il11ra,ppargc1a,oxct1,nlgn4x,plxna2,arid1a,pou3f1,srgap2,smarcc2,ptn,cd9,bbs4,nkx2-6,ogdh,map2k1,slc1a2,dmrta2,prox1,id2,csrnp1,en2,eomes,neurog3,phf8,cited1,pcdh19,otx2,satb2,cxcr4,socs7,aqp1,kcnc1,chrnb2,fzd3	3.19309
45	0.000653078	GO:0045944	positive regulation of transcription by RNA polymerase II	nkx1-1,nkx3-2,tlr3,h2afz,rest,dmrt2,pla2g1b,foxd1,ets2,auts2,hoxc4,gata3,smo,onecut1,pth,fosl1,sall1,gfi1,nkx2-2,stag1,osr1,foxc1,inhba,pax2,camta1,barhl1,nkx2-1,stat1,mllt6,nog,tfap2c,junb,rxra,ppargc1a,tet2,rfx3,znf131,vezf1,ago1,nr4a1,ikzf4,hoxc13,hmgb1,tmem173,mcrs1,tcf12,nkx2-6,erlin2,brd4,foxd2,lhx4,tcf20,tef,klf15,prox1,meis1,vgll2,plscr1,mycn,csrnp1,en2,e2f3,etv1,eomes,rreb1,tfap2a,gata6,…	3.18503
46	0.000691851	GO:0010646	regulation of cell communication	ptpra,afap1,tlr3,gria2,camk2d,grid2,rest,dapk3,mapk10,sh3gl2,tle4,sez6l,pla2g1b,ift81,sncaip,foxd1,c1qtnf3,golph3,itpr3,auts2,fgf9,chrm2,arhgef37,kitlg,irak4,rint1,grm3,gata3,smo,onecut1,pth,adm,bdnf,nkd1,sall1,banp,plk3,gfi1,nos1ap,cntn4,fshr,rtn4,snx5,eif2ak2,dynlt1,kidins220,sall3,skap2,inhba,cdh2,prex2,sulf1,gdf6,ptp4a3,dkk1,hells,plekhg5,camta1,nkx2-1,sec14l1,sstr5,socs1,rmi2,stat1,bard1,dpp…	3.15999
47	0.000990662	GO:0019219	regulation of nucleobase-containing compound metabolic process	nkx1-1,nkx3-2,tlr3,camk2d,h2afz,rest,dapk3,lin54,mapk10,sin3b,cers1,dmrt2,tle4,pla2g1b,znf608,foxd1,srek1,nedd4l,ets2,nfya,auts2,mbnl2,neurod4,hoxc4,fgf9,dhfr,irak4,pot1,gata3,smo,onecut1,znf710,dennd4a,ctc1,pth,fosl1,sall1,atmin,banp,plk3,depdc1,ptbp2,gfi1,nkx2-2,bcl11a,eif2ak2,stag1,osr1,sall3,sirt6,foxc1,inhba,sulf1,gdf6,ptp4a3,dkk1,hells,pax2,camta1,nup214,barhl1,nkx2-1,rmi2,hspd1,stat1,bard1…	3.00407
48	0.00109806	GO:0030030	cell projection organization	ptpra,lzts3,cc2d2a,fhdc1,grid2,sh3gl2,c5orf30,ift81,foxd1,golph3,nedd4l,epha6,auts2,dhfr,poc1b,gata3,smo,onecut1,whamm,adm,bdnf,atmin,dynlrb2,gfi1,cntn4,fshr,rtn4,btbd3,bcl11a,dynlt1,kidins220,cdh2,prex2,asap1,dkk1,pax2,l1cam,nkx2-1,nog,ndel1,eps8,gfra4,kit,jak2,rfx3,rilpl1,sema6a,enc1,plxna2,srgap2,atg3,stk24,rap2a,ccdc65,nek3,postn,hmgb1,ptn,bbs4,adam10,mapk6,map2k1,dvl2,cfl1,nrn1l,cdh11,negr1,…	2.95937
49	0.00110707	GO:2000026	regulation of multicellular organismal development	lzts3,nkx3-2,tlr3,grid2,rest,dmrt2,foxd1,nedd4l,fgf9,kitlg,gata3,smo,pth,adm,bdnf,nkd1,gfi1,hyal1,cntn4,fshr,rtn4,nkx2-2,bcl11a,syndig1,eif2ak2,dynlt1,kidins220,osr1,sirt6,foxc1,inhba,cdh2,sulf1,gdf6,asap1,dkk1,pax2,l1cam,nkx2-1,socs1,stat1,wnt6,nog,snai1,rab14,rxra,ndel1,xrcc5,nell1,wdr1,kit,rfx3,dmrt3,sema6a,enc1,aqp3,plxna2,vezf1,ago1,prok1,srgap2,nfkbiz,stk24,rap2a,hmgb1,pdgfd,tenm4,wnt11,ptn…	2.95583
50	0.00141909	GO:0031325	positive regulation of cellular metabolic process	nkx1-1,nkx3-2,tlr3,h2afz,odam,rest,mapk10,dmrt2,tpcn1,pla2g1b,foxd1,ets2,nfya,auts2,hoxc4,fgf9,kitlg,pot1,gata3,smo,onecut1,ctc1,pth,adm,bdnf,fosl1,sall1,atmin,banp,plk3,gfi1,nos1ap,fshr,nkx2-2,eif2ak2,stag1,kidins220,osr1,pth1r,sirt6,foxc1,inhba,adtrp,cdh2,gdf6,dkk1,pax2,camta1,barhl1,nkx2-1,pemt,socs1,hspd1,stat1,wnt6,mllt6,nog,snai1,eya2,tfap2c,junb,rxra,xrcc5,cdc6,ppargc1a,kit,naf1,tet2,tmem2…	2.84799
51	0.00143349	GO:0009893	positive regulation of metabolic process	nkx1-1,nkx3-2,tlr3,h2afz,odam,rest,mapk10,dmrt2,tpcn1,pla2g1b,foxd1,nedd4l,ets2,nfya,auts2,hoxc4,fgf9,dhfr,kitlg,pot1,gata3,smo,onecut1,ctc1,pth,adm,bdnf,fosl1,nkd1,sall1,atmin,banp,plk3,gfi1,nos1ap,fshr,nkx2-2,bcl11a,eif2ak2,stag1,kidins220,osr1,pth1r,sirt6,foxc1,inhba,adtrp,cdh2,gdf6,dkk1,pax2,camta1,barhl1,nkx2-1,pemt,socs1,sf3b1,hspd1,stat1,bard1,wnt6,mllt6,nog,snai1,eya2,tfap2c,junb,rxra,xrc…	2.84361
52	0.00164358	GO:0051240	positive regulation of multicellular organismal process	tlr3,camk2d,grid2,rest,dmrt2,foxd1,c1qtnf3,nedd4l,fgf9,kitlg,gata3,smo,pth,adm,bdnf,nos1ap,hyal1,rtn4,snx5,nkx2-2,syndig1,eif2ak2,dynlt1,kidins220,osr1,sirt6,foxc1,inhba,sulf1,gdf6,dkk1,pax2,gbp5,l1cam,sec14l1,pemt,socs1,hspd1,stat1,wnt6,nog,snai1,ndel1,xrcc5,nell1,ppargc1a,kit,elovl6,jak2,rfx3,sema6a,enc1,plxna2,gpatch3,nfkbiz,postn,hmgb1,pdgfd,tenm4,wnt11,ptn,flt4,h2afy,tmem173,lep,bbs4,tcf12,m…	2.78421
53	0.0017181	GO:0080090	regulation of primary metabolic process	nkx1-1,nkx3-2,sepsecs,tlr3,camk2d,h2afz,odam,rest,dapk3,acer1,lin54,mapk10,sin3b,cers1,plin2,dmrt2,tle4,golm1,pla2g1b,znf608,foxd1,srek1,c1qtnf3,nedd4l,ets2,nfya,auts2,mbnl2,neurod4,hoxc4,fgf9,dhfr,kitlg,irak4,pot1,gata3,smo,onecut1,znf710,dennd4a,ctc1,pth,ipo7,adm,bdnf,fosl1,nkd1,sall1,atmin,banp,plk3,depdc1,ptbp2,gfi1,nos1ap,fshr,nkx2-2,bcl11a,eif2ak2,stag1,kidins220,osr1,pth1r,sall3,sirt6,foxc…	2.76495
54	0.00186248	GO:0045595	regulation of cell differentiation	lzts3,nkx3-2,tlr3,grid2,rest,nedd4l,neurod4,fgf9,kitlg,ucma,gata3,smo,olfm2,pth,adm,bdnf,gfi1,cntn4,fshr,rtn4,nkx2-2,bcl11a,eif2ak2,dynlt1,kidins220,osr1,foxc1,inhba,cdh2,gdf6,asap1,dkk1,pax2,l1cam,nkx2-1,socs1,stat1,nog,snai1,junb,ndel1,xrcc5,suz12,dlk2,nell1,wdr1,kit,jak2,rfx3,sema6a,enc1,aqp3,plxna2,vezf1,ago1,srgap2,nfkbiz,stk24,rap2a,postn,hmgb1,tenm4,ptn,h2afy,adamts20,ccdc71l,lep,adam10,tc…	2.72991
55	0.00225108	GO:0048646	anatomical structure formation involved in morphogenesis	cc2d2a,nkx3-2,tlr3,ednra,grid2,dmrt2,foxd1,ets2,fgf9,gata3,smo,wdr72,mfge8,adm,tnnt3,nkd1,sall1,hyal1,rtn4,osr1,sirt6,foxc1,inhba,adtrp,sulf1,dkk1,sh3pxd2a,pax2,nkx2-1,stat1,wnt6,nog,snai1,eya2,egfl7,junb,wdr1,sema6a,plxna2,vezf1,arid1a,ago1,prok1,nr4a1,tenm4,wnt11,ptn,cd9,flt4,cnot2,ptprb,lep,bbs4,map2k1,dvl2,cfl1,irx3,prox1,meis1,bcl6,pik3cb,eomes,tfap2a,gata6,amot,otx2,pofut2,nfe2l2,cxcr4,jup,…	2.64761
56	0.0023858	GO:0009790	embryo development	cc2d2a,nkx3-2,ednra,dmrt2,ets2,hoxc4,fgf9,kitlg,gata3,smo,adm,fosl1,nkd1,sall1,hyal1,rtn4,kidins220,osr1,foxc1,inhba,sulf1,dkk1,pax2,pemt,wnt6,nog,snai1,eya2,rab14,junb,rxra,ndel1,kit,btf3,plxna2,arid1a,kcnq4,tenm4,wnt11,cnot2,bbs4,adam10,fbn1,nkx2-6,map2k1,dvl2,cfl1,irx3,prox1,msh2,pik3cb,id2,en2,eomes,tfap2a,gata6,cited1,amot,ocrl,otx2,satb2,pofut2,nfe2l2,acvr2a,slc9a3r1,fzd3,efna1	2.62237
57	0.0024039	GO:0043009	chordate embryonic development	cc2d2a,nkx3-2,ednra,dmrt2,hoxc4,fgf9,gata3,smo,adm,fosl1,nkd1,hyal1,rtn4,kidins220,osr1,foxc1,sulf1,dkk1,pax2,pemt,nog,snai1,junb,rxra,ndel1,btf3,plxna2,arid1a,wnt11,cnot2,bbs4,adam10,nkx2-6,map2k1,dvl2,cfl1,prox1,msh2,eomes,tfap2a,gata6,cited1,amot,ocrl,satb2,acvr2a,fzd3	2.61908
58	0.00259475	GO:0007420	brain development	grid2,sez6l,fgf9,smo,sall1,ptbp2,cntn4,rtn4,btbd3,nkx2-2,sall3,foxc1,inhba,cdh2,dkk1,pax2,barhl1,nkx2-1,ca10,nog,ndel1,xrcc5,ppargc1a,oxct1,nlgn4x,plxna2,arid1a,pou3f1,srgap2,smarcc2,ptn,cd9,bbs4,nkx2-6,ogdh,map2k1,slc1a2,dmrta2,prox1,id2,en2,eomes,neurog3,phf8,cited1,pcdh19,otx2,satb2,cxcr4,socs7,aqp1,kcnc1,chrnb2,fzd3	2.5859
59	0.00584086	GO:0009792	embryo development ending in birth or egg hatching	cc2d2a,nkx3-2,ednra,dmrt2,hoxc4,fgf9,gata3,smo,adm,fosl1,nkd1,hyal1,rtn4,kidins220,osr1,foxc1,sulf1,dkk1,pax2,pemt,nog,snai1,junb,rxra,ndel1,btf3,plxna2,arid1a,wnt11,cnot2,bbs4,adam10,nkx2-6,map2k1,dvl2,cfl1,prox1,msh2,eomes,tfap2a,gata6,cited1,amot,ocrl,satb2,acvr2a,fzd3	2.23352
60	0.00610441	GO:0007417	central nervous system development	grid2,sh3gl2,sez6l,fgf9,smo,sall1,ptbp2,cntn4,rtn4,btbd3,nkx2-2,sall3,foxc1,inhba,cdh2,dkk1,pax2,barhl1,nkx2-1,ca10,nog,ndel1,nav2,xrcc5,wdr1,ppargc1a,dmrt3,oxct1,nlgn4x,plxna2,arid1a,pou3f1,srgap2,smarcc2,tenm4,ptn,cd9,lep,bbs4,nkx2-6,ogdh,map2k1,slc1a2,cdh11,dmrta2,lhx4,prox1,id2,tnfrsf21,en2,eomes,tfap2a,neurog3,phf8,pbx3,cited1,pcdh19,otx2,satb2,cxcr4,socs7,aqp1,kcnc1,chrnb2,fzd3,elp3	2.21436
61	0.00674712	GO:0032879	regulation of localization	gria2,ednra,camk2d,rest,dapk3,sh3gl2,tmem38b,tpcn1,c5orf30,pla2g1b,sncaip,c1qtnf3,golph3,nedd4l,cd247,kcnd3,itpr3,fgf9,chrm2,kitlg,rint1,gata3,smo,onecut1,mfge8,pth,bdnf,nkd1,plk3,nos1ap,hyal1,rtn4,snx5,osr1,sirt6,inhba,adtrp,cdh2,sulf1,ptp4a3,dkk1,nup214,nkx2-1,sstr5,socs1,bard1,dpp4,tnfaip6,rnd3,mllt6,nog,snai1,rab14,ndel1,kcnk5,prrt2,polr1a,wdr1,ppargc1a,kit,naf1,leprotl1,jak2,rfx3,rnf31,mcc,a…	2.17088
62	0.00719009	GO:0000904	cell morphogenesis involved in differentiation	ptpra,lzts3,foxd1,nedd4l,epha6,auts2,gata3,smo,bdnf,cntn4,rtn4,btbd3,col21a1,kidins220,cdh2,prex2,dkk1,pax2,l1cam,nkx2-1,nog,ndel1,gfra4,wdr1,rilpl1,sema6a,plxna2,srgap2,rap2a,postn,ptn,adam10,map2k1,cfl1,cdh11,lhx4,prox1,fez2,pik3cb,id2,etv1,rreb1,neurog3,pak3,slitrk2,otx2,cxcr4,slc9a3r1,olfm1,chrnb2,fzd3,efna1,parva	2.14327
63	0.0077417	GO:0051252	regulation of RNA metabolic process	nkx1-1,nkx3-2,tlr3,camk2d,h2afz,rest,dapk3,lin54,mapk10,sin3b,dmrt2,tle4,pla2g1b,znf608,foxd1,srek1,nedd4l,ets2,nfya,auts2,mbnl2,neurod4,hoxc4,fgf9,dhfr,irak4,gata3,smo,onecut1,znf710,dennd4a,pth,fosl1,sall1,atmin,banp,plk3,depdc1,ptbp2,gfi1,nkx2-2,bcl11a,eif2ak2,stag1,osr1,sall3,sirt6,foxc1,inhba,sulf1,gdf6,ptp4a3,dkk1,hells,pax2,camta1,nup214,barhl1,nkx2-1,hspd1,stat1,bard1,hoxd11,wnt6,mllt6,no…	2.11116
64	0.00804896	GO:0072088	nephron epithelium morphogenesis	foxd1,gata3,smo,sall1,osr1,pax2,stat1,hoxd11,wnt6,nog,wnt11,irx3,cited1	2.09426
65	0.00806511	GO:0050767	regulation of neurogenesis	lzts3,grid2,rest,nedd4l,gata3,smo,bdnf,gfi1,cntn4,rtn4,nkx2-2,bcl11a,dynlt1,kidins220,cdh2,gdf6,asap1,dkk1,l1cam,nog,ndel1,xrcc5,wdr1,kit,sema6a,enc1,plxna2,srgap2,stk24,rap2a,tenm4,ptn,adam10,tcf12,mapk6,map2k1,dvl2,cfl1,irx3,negr1,dmrta2,prox1,meis1,bcl6,id2,tnfrsf21,mylip,neurog3,trim32,pak3,nfe2l2,cxcr4,olfm1,dennd5a,chrnb2,fzd3,efna1	2.09339
66	0.00825487	GO:0050789	regulation of biological process	ptpra,lzts3,tex261,spr,nkx1-1,cc2d2a,nkx3-2,afap1,sepsecs,fgl1,tlr3,npy1r,gria2,ednra,camk2d,cisd2,h2afz,grid2,mmrn1,odam,rest,dapk3,acer1,lin54,mapk10,sin3b,cers1,igfbpl1,sh3gl2,plin2,tmem38b,mtap,dmrt2,tle4,golm1,oxa1l,rasl10a,tpcn1,trim36,c5orf30,sez6l,pla2g1b,tmem132d,ift81,znf608,sncaip,foxd1,srek1,c1qtnf3,golph3,nedd4l,cd247,fam3b,ets2,epha6,nfya,kcnd3,itpr3,auts2,mbnl2,neurod4,hoxc4,krt18,…	2.08329
67	0.0090033	GO:0051960	regulation of nervous system development	lzts3,grid2,rest,nedd4l,gata3,smo,bdnf,gfi1,cntn4,rtn4,nkx2-2,bcl11a,syndig1,dynlt1,kidins220,cdh2,gdf6,asap1,dkk1,pax2,l1cam,nog,ndel1,xrcc5,wdr1,kit,sema6a,enc1,plxna2,srgap2,stk24,rap2a,tenm4,ptn,adam10,tcf12,mapk6,map2k1,dvl2,cfl1,irx3,negr1,dmrta2,prox1,meis1,bcl6,id2,tnfrsf21,mylip,neurog3,clstn3,lgi4,trim32,pak3,slitrk2,nfe2l2,cxcr4,olfm1,dennd5a,chrnb2,fzd3,efna1	2.0456
68	0.0108157	GO:0072028	nephron morphogenesis	foxd1,gata3,smo,sall1,osr1,pax2,stat1,hoxd11,wnt6,nog,wnt11,irx3,cited1	1.96595
69	0.0129221	GO:0048667	cell morphogenesis involved in neuron differentiation	ptpra,lzts3,foxd1,nedd4l,epha6,auts2,gata3,smo,bdnf,cntn4,rtn4,btbd3,kidins220,cdh2,prex2,pax2,l1cam,nkx2-1,nog,ndel1,gfra4,sema6a,plxna2,rap2a,ptn,adam10,map2k1,cfl1,cdh11,lhx4,fez2,pik3cb,id2,etv1,neurog3,pak3,slitrk2,otx2,cxcr4,slc9a3r1,olfm1,chrnb2,fzd3,efna1	1.88867
70	0.0161594	GO:0019438	aromatic compound biosynthetic process	spr,nkx1-1,nkx3-2,sepsecs,tlr3,camk2d,h2afz,rest,dapk3,lin54,mapk10,sin3b,cers1,mtap,dmrt2,tle4,pla2g1b,znf608,foxd1,nedd4l,ets2,nfya,auts2,neurod4,hoxc4,fgf9,dhfr,irak4,pot1,gata3,smo,onecut1,slc24a5,znf710,dennd4a,ctc1,pth,fosl1,sall1,atmin,banp,plk3,depdc1,gfi1,nkx2-2,bcl11a,eif2ak2,stag1,osr1,sall3,sirt6,foxc1,inhba,sulf1,gdf6,ptp4a3,dkk1,hells,pax2,camta1,barhl1,nkx2-1,hspd1,stat1,hoxd11,wnt…	1.79158
71	0.0165427	GO:0045597	positive regulation of cell differentiation	rest,nedd4l,neurod4,kitlg,gata3,smo,olfm2,adm,bdnf,nkx2-2,dynlt1,kidins220,foxc1,inhba,cdh2,gdf6,dkk1,pax2,l1cam,socs1,stat1,snai1,junb,ndel1,xrcc5,nell1,kit,jak2,rfx3,sema6a,enc1,plxna2,vezf1,nfkbiz,hmgb1,tenm4,ptn,h2afy,adamts20,ccdc71l,tcf12,mapk6,znf703,map2k1,dvl2,irx3,negr1,cth,dmrta2,ptprc,prox1,bcl6,id2,rreb1,gata6,neurog3,trim32,pak3,ppp2r3c,nfe2l2,acvr2a,cxcr4,olfm1,fzd3	1.78139
72	0.0172429	GO:0030900	forebrain development	smo,sall1,rtn4,btbd3,sall3,inhba,cdh2,dkk1,nkx2-1,nog,ndel1,ppargc1a,arid1a,pou3f1,srgap2,smarcc2,ptn,bbs4,nkx2-6,ogdh,slc1a2,dmrta2,prox1,id2,eomes,neurog3,otx2,satb2,cxcr4,socs7,aqp1,kcnc1,chrnb2	1.76339
73	0.0181777	GO:0065007	biological regulation	ptpra,lzts3,tex261,spr,nkx1-1,cc2d2a,nkx3-2,afap1,sepsecs,fgl1,tlr3,clcn3,npy1r,gria2,ednra,camk2d,cisd2,h2afz,grid2,mmrn1,odam,rest,dapk3,acer1,lin54,mapk10,sin3b,cers1,igfbpl1,sh3gl2,plin2,tmem38b,mtap,dmrt2,tle4,golm1,oxa1l,rasl10a,tpcn1,trim36,c5orf30,sgsm1,sez6l,pla2g1b,tmem132d,ift81,znf608,sncaip,hsd17b4,serinc5,foxd1,pcsk1,srek1,c1qtnf3,golph3,nedd4l,cd247,fam3b,ets2,epha6,nfya,kcnd3,itpr…	1.74046
74	0.0190415	GO:0048568	embryonic organ development	cc2d2a,nkx3-2,hoxc4,fgf9,kitlg,gata3,smo,adm,sall1,hyal1,osr1,foxc1,pax2,nog,snai1,junb,kit,arid1a,kcnq4,wnt11,bbs4,fbn1,nkx2-6,map2k1,dvl2,prox1,id2,en2,eomes,tfap2a,cited1,satb2,slc9a3r1,fzd3,efna1	1.7203
75	0.0202812	GO:2000112	regulation of cellular macromolecule biosynthetic process	nkx1-1,nkx3-2,sepsecs,tlr3,camk2d,h2afz,rest,dapk3,lin54,mapk10,sin3b,cers1,dmrt2,tle4,pla2g1b,znf608,foxd1,nedd4l,ets2,nfya,auts2,neurod4,hoxc4,fgf9,dhfr,irak4,pot1,gata3,smo,onecut1,znf710,dennd4a,ctc1,pth,fosl1,sall1,atmin,banp,plk3,depdc1,gfi1,nkx2-2,bcl11a,eif2ak2,stag1,osr1,sall3,sirt6,foxc1,inhba,sulf1,gdf6,ptp4a3,dkk1,hells,pax2,camta1,barhl1,nkx2-1,hspd1,stat1,hoxd11,wnt6,mllt6,nog,snai1…	1.69291
76	0.021122	GO:0006355	regulation of transcription, DNA-templated	nkx1-1,nkx3-2,tlr3,camk2d,h2afz,rest,dapk3,lin54,mapk10,sin3b,dmrt2,tle4,pla2g1b,znf608,foxd1,nedd4l,ets2,nfya,auts2,neurod4,hoxc4,fgf9,dhfr,irak4,gata3,smo,onecut1,znf710,dennd4a,pth,fosl1,sall1,atmin,banp,plk3,depdc1,gfi1,nkx2-2,bcl11a,eif2ak2,stag1,osr1,sall3,sirt6,foxc1,inhba,sulf1,gdf6,ptp4a3,dkk1,hells,pax2,camta1,barhl1,nkx2-1,hspd1,stat1,hoxd11,wnt6,mllt6,nog,snai1,tfap2c,junb,rxra,xrcc5,…	1.67526
77	0.0226349	GO:0045664	regulation of neuron differentiation	lzts3,grid2,rest,nedd4l,gata3,bdnf,gfi1,cntn4,rtn4,nkx2-2,bcl11a,dynlt1,kidins220,cdh2,gdf6,asap1,dkk1,l1cam,ndel1,sema6a,enc1,plxna2,stk24,rap2a,ptn,adam10,tcf12,mapk6,map2k1,dvl2,cfl1,irx3,negr1,prox1,meis1,bcl6,id2,mylip,neurog3,trim32,pak3,nfe2l2,cxcr4,olfm1,dennd5a,chrnb2,efna1	1.64522
78	0.0226623	GO:0072009	nephron epithelium development	foxd1,gata3,smo,sall1,osr1,foxc1,pax2,stat1,hoxd11,wnt6,nog,wnt11,irx3,klf15,cited1	1.6447
79	0.0240997	GO:0060284	regulation of cell development	lzts3,grid2,rest,nedd4l,gata3,smo,bdnf,gfi1,cntn4,rtn4,nkx2-2,bcl11a,dynlt1,kidins220,cdh2,gdf6,asap1,dkk1,l1cam,nog,ndel1,xrcc5,wdr1,kit,rfx3,sema6a,enc1,plxna2,srgap2,stk24,rap2a,postn,tenm4,ptn,adam10,tcf12,mapk6,fbn1,map2k1,dvl2,cfl1,irx3,negr1,dmrta2,prox1,meis1,bcl6,id2,tnfrsf21,mylip,rreb1,neurog3,gsk3a,trim32,pak3,nfe2l2,cxcr4,olfm1,dennd5a,chrnb2,fzd3,efna1	1.61799
80	0.0242837	GO:0034654	nucleobase-containing compound biosynthetic process	nkx1-1,nkx3-2,sepsecs,tlr3,camk2d,h2afz,rest,dapk3,lin54,mapk10,sin3b,cers1,mtap,dmrt2,tle4,pla2g1b,znf608,foxd1,nedd4l,ets2,nfya,auts2,neurod4,hoxc4,fgf9,dhfr,irak4,pot1,gata3,smo,onecut1,znf710,dennd4a,ctc1,pth,fosl1,sall1,atmin,banp,plk3,depdc1,gfi1,nkx2-2,bcl11a,eif2ak2,stag1,osr1,sall3,sirt6,foxc1,inhba,sulf1,gdf6,ptp4a3,dkk1,hells,pax2,camta1,barhl1,nkx2-1,hspd1,stat1,hoxd11,wnt6,mllt6,nog,…	1.61468
81	0.0256773	GO:0022603	regulation of anatomical structure morphogenesis	lzts3,tlr3,dapk3,dmrt2,nedd4l,gata3,strip2,smo,adm,bdnf,nkd1,hyal1,rtn4,bcl11a,osr1,sirt6,foxc1,cdh2,sulf1,dkk1,pax2,l1cam,stat1,rnd3,wnt6,nog,rxra,ndel1,eps8,wdr1,ppargc1a,kit,dmrt3,sema6a,brwd1,plxna2,ago1,prok1,rap2a,larp4,postn,tenm4,wnt11,ptn,flt4,lep,adam10,map2k1,dvl2,cfl1,prox1,bcl6,rreb1,tfap2a,gata6,neurog3,cited1,pak3,amot,psmb9,otx2,nfe2l2,cxcr4,jup,slc9a3r1,olfm1,aqp1,chrnb2,fzd3,efn…	1.59045
82	0.0260559	GO:0009887	animal organ morphogenesis	nkx3-2,fgl1,npy1r,odam,foxd1,hoxc4,fgf9,gata3,smo,wdr72,adm,nkd1,sall1,hyal1,rtn4,col21a1,osr1,myl3,sirt6,foxc1,inhba,cdh2,sulf1,dkk1,pax2,nkx2-1,stat1,hoxd11,wnt6,nog,snai1,rxra,dmrt3,stx2,sema6a,aqp3,arid1a,kcnq4,hoxc13,wnt11,ptn,bbs4,fbn1,map2k1,dvl2,irx3,lhx4,prox1,meis1,id2,csrnp1,dsp,tfap2a,gata6,gsk3a,cited1,psmb9,nab1,tmeff2,satb2,slc9a3r1,olfm1,aqp1,mdm4,fzd3,efna1,parva	1.58409
83	0.0286566	GO:0031326	regulation of cellular biosynthetic process	nkx1-1,nkx3-2,sepsecs,tlr3,camk2d,h2afz,rest,dapk3,lin54,mapk10,sin3b,cers1,dmrt2,tle4,pla2g1b,znf608,foxd1,c1qtnf3,nedd4l,ets2,nfya,auts2,neurod4,hoxc4,fgf9,dhfr,irak4,pot1,gata3,smo,onecut1,slc24a5,znf710,dennd4a,ctc1,pth,adm,fosl1,sall1,atmin,banp,plk3,depdc1,gfi1,nos1ap,nkx2-2,bcl11a,eif2ak2,stag1,osr1,pth1r,sall3,sirt6,foxc1,inhba,sulf1,gdf6,ptp4a3,dkk1,hells,pax2,camta1,barhl1,nkx2-1,pemt,h…	1.54278
84	0.0299515	GO:0061564	axon development	ptpra,foxd1,epha6,auts2,dhfr,gata3,smo,bdnf,cntn4,rtn4,dynlt1,cdh2,pax2,l1cam,nkx2-1,nog,ndel1,gfra4,jak2,sema6a,plxna2,stk24,ptn,map2k1,cdh11,lhx4,fez2,pik3cb,tnfrsf21,etv1,trim32,pak3,slitrk2,otx2,cxcr4,olfm1,chrnb2,fzd3,efna1	1.52358
85	0.0312716	GO:0009966	regulation of signal transduction	afap1,tlr3,gria2,camk2d,dapk3,mapk10,sh3gl2,tle4,sez6l,pla2g1b,ift81,foxd1,c1qtnf3,golph3,auts2,fgf9,arhgef37,kitlg,irak4,rint1,gata3,smo,onecut1,pth,adm,bdnf,nkd1,sall1,banp,plk3,gfi1,nos1ap,fshr,rtn4,snx5,eif2ak2,dynlt1,kidins220,sall3,skap2,inhba,cdh2,prex2,sulf1,gdf6,ptp4a3,dkk1,hells,plekhg5,camta1,nkx2-1,sec14l1,socs1,rmi2,stat1,bard1,nog,snai1,eya2,egfl7,eps8,dlk2,dennd4b,ppargc1a,tmem33,r…	1.50485
86	0.0314456	GO:0018130	heterocycle biosynthetic process	spr,nkx1-1,nkx3-2,sepsecs,tlr3,camk2d,h2afz,rest,dapk3,lin54,mapk10,sin3b,cers1,mtap,dmrt2,tle4,pla2g1b,znf608,foxd1,nedd4l,ets2,nfya,auts2,neurod4,hoxc4,fgf9,dhfr,irak4,pot1,gata3,smo,onecut1,znf710,dennd4a,ctc1,pth,fosl1,sall1,atmin,banp,plk3,depdc1,gfi1,nkx2-2,bcl11a,eif2ak2,stag1,osr1,sall3,sirt6,foxc1,inhba,sulf1,gdf6,ptp4a3,dkk1,hells,pax2,camta1,barhl1,nkx2-1,hspd1,stat1,hoxd11,wnt6,mllt6,…	1.50244
87	0.0320241	GO:0009889	regulation of biosynthetic process	nkx1-1,nkx3-2,sepsecs,tlr3,camk2d,h2afz,rest,dapk3,lin54,mapk10,sin3b,cers1,dmrt2,tle4,pla2g1b,znf608,foxd1,c1qtnf3,nedd4l,ets2,nfya,auts2,neurod4,hoxc4,fgf9,dhfr,irak4,pot1,gata3,smo,onecut1,slc24a5,znf710,dennd4a,ctc1,pth,adm,fosl1,sall1,atmin,banp,plk3,depdc1,gfi1,nos1ap,nkx2-2,bcl11a,eif2ak2,stag1,osr1,pth1r,sall3,sirt6,foxc1,inhba,sulf1,gdf6,ptp4a3,dkk1,hells,pax2,camta1,barhl1,nkx2-1,pemt,h…	1.49452
88	0.0330288	GO:1901362	organic cyclic compound biosynthetic process	spr,nkx1-1,nkx3-2,sepsecs,tlr3,camk2d,h2afz,rest,dapk3,lin54,mapk10,sin3b,cers1,mtap,dmrt2,tle4,pla2g1b,znf608,hsd17b4,foxd1,nedd4l,ets2,nfya,auts2,neurod4,hoxc4,fgf9,dhfr,irak4,pot1,gata3,smo,onecut1,slc24a5,znf710,dennd4a,ctc1,pth,adm,fosl1,sall1,atmin,banp,plk3,depdc1,osbpl9,gfi1,nkx2-2,bcl11a,eif2ak2,stag1,osr1,sall3,sirt6,foxc1,inhba,sulf1,gdf6,ptp4a3,dkk1,hells,pax2,camta1,barhl1,nkx2-1,hsp…	1.48111
89	0.0334866	GO:0019222	regulation of metabolic process	spr,nkx1-1,nkx3-2,sepsecs,tlr3,camk2d,cisd2,h2afz,odam,rest,dapk3,acer1,lin54,mapk10,sin3b,cers1,sh3gl2,plin2,dmrt2,tle4,golm1,oxa1l,tpcn1,pla2g1b,tmem132d,znf608,foxd1,srek1,c1qtnf3,nedd4l,ets2,nfya,auts2,mbnl2,neurod4,hoxc4,fgf9,dhfr,kitlg,irak4,pot1,gata3,smo,onecut1,slc24a5,shc4,znf710,dennd4a,ctc1,pth,ipo7,adm,bdnf,fosl1,nkd1,sall1,atmin,banp,plk3,depdc1,ptbp2,gfi1,nos1ap,fshr,snx5,nkx2-2,bc…	1.47513
90	0.0335256	GO:0072078	nephron tubule morphogenesis	foxd1,gata3,smo,sall1,osr1,pax2,hoxd11,wnt6,nog,wnt11,irx3,cited1	1.47462
91	0.0375256	GO:1903506	regulation of nucleic acid-templated transcription	nkx1-1,nkx3-2,tlr3,camk2d,h2afz,rest,dapk3,lin54,mapk10,sin3b,dmrt2,tle4,pla2g1b,znf608,foxd1,nedd4l,ets2,nfya,auts2,neurod4,hoxc4,fgf9,dhfr,irak4,gata3,smo,onecut1,znf710,dennd4a,pth,fosl1,sall1,atmin,banp,plk3,depdc1,gfi1,nkx2-2,bcl11a,eif2ak2,stag1,osr1,sall3,sirt6,foxc1,inhba,sulf1,gdf6,ptp4a3,dkk1,hells,pax2,camta1,barhl1,nkx2-1,hspd1,stat1,hoxd11,wnt6,mllt6,nog,snai1,tfap2c,junb,rxra,xrcc5,…	1.42567
92	0.0392693	GO:0090304	nucleic acid metabolic process	nkx1-1,nkx3-2,sepsecs,tlr3,neil3,camk2d,h2afz,rest,dapk3,lin54,mapk10,sin3b,cers1,psip1,dmrt2,tle4,ercc6l2,pla2g1b,znf608,foxd1,srek1,nedd4l,ets2,nfya,auts2,mbnl2,neurod4,hoxc4,fgf9,dhfr,irak4,pot1,gata3,smo,tarsl2,onecut1,znf710,dennd4a,ctc1,pth,fosl1,sall1,atmin,banp,plk3,depdc1,ptbp2,gfi1,nkx2-2,bcl11a,eif2ak2,sf3b5,stag1,osr1,sall3,sirt6,foxc1,inhba,sulf1,gdf6,ptp4a3,dkk1,hells,pax2,camta1,nu…	1.40595
93	0.0407344	GO:2001141	regulation of RNA biosynthetic process	nkx1-1,nkx3-2,tlr3,camk2d,h2afz,rest,dapk3,lin54,mapk10,sin3b,dmrt2,tle4,pla2g1b,znf608,foxd1,nedd4l,ets2,nfya,auts2,neurod4,hoxc4,fgf9,dhfr,irak4,gata3,smo,onecut1,znf710,dennd4a,pth,fosl1,sall1,atmin,banp,plk3,depdc1,gfi1,nkx2-2,bcl11a,eif2ak2,stag1,osr1,sall3,sirt6,foxc1,inhba,sulf1,gdf6,ptp4a3,dkk1,hells,pax2,camta1,barhl1,nkx2-1,hspd1,stat1,hoxd11,wnt6,mllt6,nog,snai1,tfap2c,junb,rxra,xrcc5,…	1.39004
94	0.0419597	GO:0072006	nephron development	foxd1,gata3,smo,sall1,osr1,foxc1,sulf1,pax2,stat1,hoxd11,wnt6,nog,pdgfd,wnt11,irx3,klf15,cited1	1.37717
95	0.0443009	GO:0045934	negative regulation of nucleobase-containing compound metabolic process	nkx3-2,rest,mapk10,sin3b,cers1,tle4,znf608,foxd1,nedd4l,ets2,fgf9,pot1,gata3,smo,ctc1,pth,sall1,plk3,depdc1,ptbp2,gfi1,bcl11a,osr1,sirt6,foxc1,dkk1,hells,pax2,nkx2-1,rmi2,stat1,bard1,nog,snai1,tfap2c,junb,rxra,xrcc5,suz12,rps13,ppargc1a,naf1,rfx3,znf131,arid1a,smarcc2,ikzf4,hmgb1,wnt11,h2afy,cnot2,lep,znf703,kank2,pkp3,tshz3,znf423,tob2,prox1,msh2,bcl6,id2,e2f3,dap,eomes,rreb1,tfap2a,gata6,runx1t…	1.35359

## Sheet: Supp Table 1f
24hpa gene ontology results
	p_value	term_id	term_name	intersection	logp
1	0.000720279	GO:0045778	positive regulation of ossification	jund,fbn2,ptn,cyr61,fbxo5,tp63,gli3,ctnnb1,tfap2a,prkd1,bmpr2,acvr1,acvr2a	3.1425
2	0.000838853	GO:0045669	positive regulation of osteoblast differentiation	jund,fbn2,cyr61,fbxo5,tp63,gli3,ctnnb1,prkd1,bmpr2,acvr1,acvr2a	3.07631
3	0.00471082	GO:0071495	cellular response to endogenous stimulus	fgfbp1,rapgef2,polr2b,jund,klf9,klhl22,fbn2,isl1,skor2,ncor1,notch1,zmpste24,kmt2d,timeless,p2ry2,atp6v0a4,chrm2,ptn,fgfr4,nr1h4,furin,atp6v1b1,dnm2,carm1,wt1,uri1,cyr61,cdh1,rgs8,atf4,gnai2,klf15,tada3,plcb1,spred2,kif16b,smyd3,arid1b,tp63,xrn1,lpin1,ctnnb1,nr4a3,prdm14,gdf6,ube2d1,ogt,foxo4,fgf16,spry3,fos,spred1,ctss,insrr,atp1a2,fam83g,bmpr2,itga4,acvr1,acvr2a,ube2o,folr1,plod3,fstl1,ddx18	2.3269
4	0.00539092	GO:0110151	positive regulation of biomineralization	fbn2,ptn,cyr61,atf4,fbxo5,tfap2a,bmpr2,acvr1,acvr2a	2.26834
5	0.00539092	GO:0070169	positive regulation of biomineral tissue development	fbn2,ptn,cyr61,atf4,fbxo5,tfap2a,bmpr2,acvr1,acvr2a	2.26834
6	0.00708975	GO:0110149	regulation of biomineralization	fbn2,notch1,zmpste24,ptn,cyr61,atf4,fbxo5,ankh,tfap2a,bmpr2,acvr1,acvr2a	2.14937
7	0.00708975	GO:0070167	regulation of biomineral tissue development	fbn2,notch1,zmpste24,ptn,cyr61,atf4,fbxo5,ankh,tfap2a,bmpr2,acvr1,acvr2a	2.14937
8	0.00834063	GO:0048645	animal organ formation	nkx3-2,isl1,notch1,wt1,tp63,wnt3a,shh,gli3,ctnnb1,folr1	2.0788
9	0.00844308	GO:0045893	positive regulation of transcription, DNA-templated	nkx3-2,smarca5,jund,ptch1,nfatc4,ssbp2,isl1,erg,cited4,sox13,ddx3x,notch1,auts2,med4,kmt2d,med17,wnt11,nr1h4,dnm2,carm1,dvl2,traf6,wt1,cyr61,cdh1,mysm1,ier5,prrx1,atf4,klf15,tada3,fezf2,plcb1,otx1,smyd3,arid1b,tp63,lpin1,mycn,wnt3a,shh,irf4,med10,gli3,ctnnb1,nr4a3,tfap2a,gdf6,fank1,pbx3,lhx6,ogt,foxo4,hmgb3,taf9b,fos,six4,eapp,prkd1,slc40a1,bmpr2,acvr1,acvr2a,ash1l,znf300,znf148	2.0735
10	0.00956257	GO:0071310	cellular response to organic substance	fgfbp1,rapgef2,smarca5,dnajb14,polr2b,pias4,jund,sec31a,pdcd1lg2,klf9,dapk1,ptch1,nfatc4,klhl22,fbn2,sema6a,ocln,isl1,ccbe1,skor2,epg5,ncor1,ifnlr1,mpc2,notch1,kmt2d,timeless,p2ry2,wnt11,atp6v0a4,chrm2,ptn,fgfr4,nr1h4,dnajb9,furin,atp6v1b1,dnm2,carm1,traf6,ccnd1,wt1,uri1,cyr61,cdh1,rgs8,atf4,gnai2,klf15,tada3,plcb1,b3gnt2,spred2,kif16b,smyd3,arid1b,srsf7,tab2,tp63,xrn1,lpin1,fkbp1b,wnt3a,tax1bp1,…	2.01943
11	0.0106832	GO:0045944	positive regulation of transcription by RNA polymerase II	nkx3-2,smarca5,jund,nfatc4,ssbp2,isl1,erg,cited4,sox13,ddx3x,notch1,auts2,kmt2d,med17,nr1h4,carm1,traf6,wt1,cyr61,mysm1,ier5,prrx1,atf4,klf15,fezf2,otx1,smyd3,tp63,lpin1,mycn,wnt3a,shh,irf4,med10,gli3,ctnnb1,nr4a3,tfap2a,pbx3,lhx6,ogt,foxo4,hmgb3,taf9b,fos,six4,eapp,prkd1,slc40a1,bmpr2,acvr1,acvr2a,ash1l,znf300,znf148	1.9713
12	0.0114157	GO:0045935	positive regulation of nucleobase-containing compound metabolic process	nkx3-2,smarca5,jund,ptch1,nfatc4,ssbp2,isl1,erg,fancb,guca1c,cited4,sox13,ddx3x,notch1,auts2,med4,kmt2d,timeless,med17,wnt11,fgfr4,nr1h4,dnm2,carm1,dvl2,traf6,wt1,cyr61,cdh1,mysm1,ier5,prrx1,wbp2nl,atf4,klf15,tada3,fezf2,msh2,plcb1,otx1,smyd3,arid1b,tp63,lpin1,mycn,wnt3a,shh,cct5,irf4,med10,gli3,ctnnb1,nr4a3,tfap2a,gdf6,fank1,ercc1,pbx3,lhx6,ogt,foxo4,hmgb3,taf9b,fos,six4,eapp,prkd1,slc40a1,bmpr2…	1.9425
13	0.0124694	GO:0070887	cellular response to chemical stimulus	fgfbp1,rapgef2,smarca5,dnajb14,polr2b,pias4,jund,sec31a,pdcd1lg2,klf9,dapk1,ptch1,nfatc4,klhl22,fbn2,sema6a,ocln,isl1,ccbe1,skor2,epg5,aqp3,ncor1,ifnlr1,mpc2,ddx3x,notch1,kmt2d,timeless,p2ry2,wnt11,atp6v0a4,chrm2,ptn,fgfr4,nr1h4,dnajb9,gpr37,furin,atp6v1b1,dnm2,carm1,swap70,traf6,ccnd1,wt1,uri1,cyr61,cdh1,rgs8,atf4,gnai2,klf15,tada3,kcnh1,plcb1,b3gnt2,spred2,kif16b,smyd3,arid1b,srsf7,tab2,tp63,xr…	1.90415
14	0.0130013	GO:0000902	cell morphogenesis	vax2,rapgef2,ptch1,nfatc4,sema6a,isl1,nedd4l,skor2,notch1,zmpste24,auts2,fry,ptn,csnk1a1,dbn1,unc5a,dnm2,zswim4,dvl2,cdh1,plxna1,fezf2,b3gnt2,wnt3a,shh,gli3,ctnnb1,nr4a3,cdh7,prdm14,col14a1,dpysl4,cacng7,scn1b,sipa1l3,rhov,llgl1,tbccd1,itgav,bmpr2,nrp2,stradb,itga4,rnd3,cdh22,plod3,epha2,mink1,eif4g2,plxna3	1.88601
15	0.0152597	GO:0048812	neuron projection morphogenesis	vax2,rapgef2,ptch1,nfatc4,sema6a,isl1,nedd4l,skor2,notch1,auts2,ptn,dbn1,unc5a,dnm2,zswim4,dvl2,plxna1,fezf2,b3gnt2,wnt3a,shh,gli3,ctnnb1,nr4a3,dpysl4,cacng7,scn1b,llgl1,bmpr2,nrp2,stradb,itga4,epha2,mink1,eif4g2,plxna3	1.81645
16	0.0210264	GO:0032989	cellular component morphogenesis	vax2,rapgef2,ptch1,nfatc4,sema6a,isl1,nedd4l,skor2,myom3,notch1,zmpste24,auts2,fry,ptn,csnk1a1,dbn1,unc5a,dnm2,zswim4,dvl2,cdh1,plxna1,fezf2,b3gnt2,wnt3a,shh,gli3,ctnnb1,nr4a3,cdh7,prdm14,col14a1,dpysl4,cacng7,scn1b,sipa1l3,six4,rhov,llgl1,tbccd1,itgav,bmpr2,nrp2,stradb,itga4,rnd3,zpbp2,cdh22,plod3,epha2,mink1,eif4g2,plxna3	1.67723
17	0.0242644	GO:0120039	plasma membrane bounded cell projection morphogenesis	vax2,rapgef2,ptch1,nfatc4,sema6a,isl1,nedd4l,skor2,notch1,auts2,ptn,dbn1,unc5a,dnm2,zswim4,dvl2,plxna1,fezf2,b3gnt2,wnt3a,shh,gli3,ctnnb1,nr4a3,dpysl4,cacng7,scn1b,llgl1,bmpr2,nrp2,stradb,itga4,epha2,mink1,eif4g2,plxna3	1.61503
18	0.0262591	GO:0030278	regulation of ossification	jund,ptch1,fbn2,notch1,zmpste24,ptn,cyr61,fbxo5,tp63,ankh,gli3,ctnnb1,tfap2a,prkd1,bmpr2,acvr1,acvr2a	1.58072
19	0.0271851	GO:1903508	positive regulation of nucleic acid-templated transcription	nkx3-2,smarca5,jund,ptch1,nfatc4,ssbp2,isl1,erg,cited4,sox13,ddx3x,notch1,auts2,med4,kmt2d,med17,wnt11,nr1h4,dnm2,carm1,dvl2,traf6,wt1,cyr61,cdh1,mysm1,ier5,prrx1,wbp2nl,atf4,klf15,tada3,fezf2,plcb1,otx1,smyd3,arid1b,tp63,lpin1,mycn,wnt3a,shh,irf4,med10,gli3,ctnnb1,nr4a3,tfap2a,gdf6,fank1,pbx3,lhx6,ogt,foxo4,hmgb3,taf9b,fos,six4,eapp,prkd1,slc40a1,bmpr2,acvr1,acvr2a,ash1l,znf300,znf148	1.56567
20	0.0274045	GO:0001649	osteoblast differentiation	jund,ptch1,fbn2,notch1,wnt11,ache,cyr61,fbxo5,tp63,wnt3a,shh,gli3,ctnnb1,prkd1,bmpr2,acvr1,acvr2a,epha2	1.56218
21	0.0276177	GO:0048858	cell projection morphogenesis	vax2,rapgef2,ptch1,nfatc4,sema6a,isl1,nedd4l,skor2,notch1,auts2,ptn,dbn1,unc5a,dnm2,zswim4,dvl2,plxna1,fezf2,b3gnt2,wnt3a,shh,gli3,ctnnb1,nr4a3,dpysl4,cacng7,scn1b,llgl1,bmpr2,nrp2,stradb,itga4,epha2,mink1,eif4g2,plxna3	1.55881
22	0.0277409	GO:1902680	positive regulation of RNA biosynthetic process	nkx3-2,smarca5,jund,ptch1,nfatc4,ssbp2,isl1,erg,cited4,sox13,ddx3x,notch1,auts2,med4,kmt2d,med17,wnt11,nr1h4,dnm2,carm1,dvl2,traf6,wt1,cyr61,cdh1,mysm1,ier5,prrx1,wbp2nl,atf4,klf15,tada3,fezf2,plcb1,otx1,smyd3,arid1b,tp63,lpin1,mycn,wnt3a,shh,irf4,med10,gli3,ctnnb1,nr4a3,tfap2a,gdf6,fank1,pbx3,lhx6,ogt,foxo4,hmgb3,taf9b,fos,six4,eapp,prkd1,slc40a1,bmpr2,acvr1,acvr2a,ash1l,znf300,znf148	1.55688
23	0.028373	GO:0045667	regulation of osteoblast differentiation	jund,ptch1,fbn2,notch1,cyr61,fbxo5,tp63,gli3,ctnnb1,prkd1,bmpr2,acvr1,acvr2a	1.54709
24	0.0294495	GO:0048729	tissue morphogenesis	frem2,ptch1,nfatc4,gcnt4,isl1,myom3,tnni1,notch1,tbx4,timeless,wnt11,dvl2,traf6,wt1,cyr61,nkd1,plxna1,tp63,wnt3a,shh,irx1,gli3,ctnnb1,nr4a3,tfap2a,col14a1,six4,psma6,itgax,bmpr2,nrp2,acvr1,folr1,plod3,epha2,psmb7	1.53092
25	0.0364368	GO:0048666	neuron development	vax2,rapgef2,ptch1,nfatc4,sema6a,isl1,nedd4l,skor2,notch1,auts2,dclk2,fry,ptn,dbn1,unc5a,dnm2,carm1,zswim4,c3,dvl2,cdh1,prrx1,plxna1,fezf2,b3gnt2,arid1b,fkbp1b,wnt3a,shh,gli3,ctnnb1,nr4a3,rp1,dpysl4,mapk8,cacng7,scn1b,pbx3,lhx6,spry3,prkd1,llgl1,bmpr2,nrp2,stradb,itga4,folr1,epha2,mink1,eif4g2,plxna3	1.43846
26	0.0406705	GO:0010033	response to organic substance	fgfbp1,rapgef2,smarca5,tacr3,dnajb14,polr2b,pias4,jund,sec31a,pdcd1lg2,klf9,dapk1,ptch1,nfatc4,klhl22,fbn2,sema6a,ocln,isl1,ccbe1,skor2,epg5,aqp3,ncor1,ifnlr1,mpc2,notch1,kmt2d,timeless,p2ry2,wnt11,atp6v0a4,chrm2,ptn,fgfr4,faf2,nr1h4,dnajb9,furin,atp6v1b1,dnm2,carm1,traf6,ccnd1,wt1,uri1,cyr61,dnajc4,slc3a2,cdh1,plcg2,rgs8,atf4,gnai2,klf15,tada3,plcb1,b3gnt2,spred2,kif16b,smyd3,arid1b,srsf7,tab2,t…	1.39072
27	0.0408672	GO:0007399	nervous system development	vax2,rapgef2,pcdh18,ptch1,nfatc4,sema6a,naip,isl1,nedd4l,skor2,notch1,auts2,dclk2,fry,tmem126a,wnt11,chrm2,ptn,tlx3,dbn1,fgfr4,unc5a,dnm2,carm1,zswim4,c3,ache,dvl2,traf6,mcoln3,ttll7,nkd1,cdh1,prrx1,atf4,klf15,plxna1,fezf2,plcb1,b3gnt2,otx1,arid1b,tp63,mcph1,fkbp1b,wnt3a,shh,gli3,ctnnb1,nr4a3,tfap2a,rp1,gdf6,dpysl4,marveld1,mapk8,psap,ctnnd1,cacng7,scn1b,ak8,pbx3,lhx6,pcdh19,spry3,mark4,fos,btbd6…	1.38862
28	0.0460073	GO:0051173	positive regulation of nitrogen compound metabolic process	cdc25b,nkx3-2,rapgef2,smarca5,pias4,jund,dapk1,ptch1,nfatc4,ssbp2,map3k1,isl1,ccbe1,nedd4l,erg,traf4,fancb,guca1c,cited4,sox13,ddx3x,notch1,auts2,med4,kmt2d,timeless,wdfy2,med17,wnt11,csnk1a1,fgfr4,nr1h4,gpr37,arih1,bcl2l10,furin,clpx,dnm2,carm1,c3,dvl2,pacsin3,traf6,ccnd1,wt1,cyr61,stx5,nkd1,cdh1,mysm1,trabd2b,ier5,rpl5,prrx1,wbp2nl,atf4,gnai2,klf15,tada3,fezf2,spdya,msh2,plcb1,fam161a,commd1,ot…	1.33717
29	0.0476349	GO:0003002	regionalization	vax2,pcsk5,ptch1,isl1,notch1,c3,dvl2,wt1,nkd1,fezf2,otx1,tp63,wnt3a,shh,irx1,gli3,ctnnb1,pbx3,bmpr2,nrp2,acvr1,acvr2a,pofut1	1.32208
30	0.0485673	GO:0001503	ossification	jund,ptch1,fbn2,notch1,zmpste24,wnt11,atp6v0a4,ptn,atp6v1b1,ache,traf6,cyr61,fbxo5,tp63,wnt3a,shh,ankh,gli3,ctnnb1,tfap2a,prkd1,bmpr2,acvr1,acvr2a,epha2	1.31366

## Sheet: Supp Table 1g
72hpa gene ontology results
	p_value	term_id	term_name	intersection	logp
1	3.39876e-07	GO:0009653	anatomical structure morphogenesis	wdr1,spry1,grid2,epha5,dmrt2,dmrt3,pcsk5,fancc,fbn2,gdnf,gap43,dscam,gabpa,serpinf1,arx,lhx1,amigo1,shroom2,rhoc,auts2,nr4a1,vdr,hoxc13,nox4,tenm4,ptn,cd9,flt4,msx2,dcn,foxb1,acan,irx3,irx5,gnao1,lhx4,hyal1,prox1,six2,pax1,lats1,dock10,agtr1,sox11,id2,fam84a,osr1,rhob,wnt9a,ccm2,naca,csrnp1,acvr2b,lmbr1,nfatc1,adamts16,meox2,egfr,inhba,ctnnb1,eomes,thrb,ss18,cdh2,prdm14,eya1,mmp16,mtdh,rspo2,atrn…	6.46868
2	1.04466e-06	GO:0009790	embryo development	dmrt2,pcsk5,fbn2,gdnf,gabpa,lhx1,tenm4,msx2,foxb1,cebpa,irx3,irx5,hyal1,prox1,six2,pax1,lats1,trip12,tpo,sox11,id2,osr1,wnt9a,ccm2,acvr2b,en2,lmbr1,ncapg2,meox2,egfr,inhba,ctnnb1,eomes,dsc3,prdm14,eya1,mmp16,rspo2,zfat,zmiz1,rnf207,ar,amot,epn1,als2,cebpb,snai1,sulf2,slc9a3r1,tp53,sox6	5.98103
3	1.45705e-06	GO:0009887	animal organ morphogenesis	spry1,dmrt3,fancc,fbn2,gdnf,dscam,lhx1,shroom2,vdr,hoxc13,ptn,msx2,dcn,acan,irx3,irx5,gnao1,lhx4,hyal1,prox1,six2,pax1,sox11,id2,osr1,wnt9a,naca,csrnp1,acvr2b,adamts16,egfr,inhba,ctnnb1,thrb,cdh2,eya1,mmp16,rspo2,atrnl1,pitx3,zmiz1,rnf207,ar,actc1,nab1,gaa,cebpb,snai1,sulf2,slc9a3r1,olfm1,tp53,shfm1	5.83653
4	1.0823e-05	GO:0043009	chordate embryonic development	dmrt2,pcsk5,gabpa,lhx1,foxb1,cebpa,irx5,hyal1,prox1,six2,pax1,lats1,sox11,osr1,wnt9a,ccm2,ncapg2,meox2,egfr,ctnnb1,eomes,dsc3,prdm14,eya1,mmp16,zfat,zmiz1,ar,amot,epn1,als2,cebpb,snai1,sulf2,tp53,sox6	4.96565
5	2.50129e-05	GO:0009792	embryo development ending in birth or egg hatching	dmrt2,pcsk5,gabpa,lhx1,foxb1,cebpa,irx5,hyal1,prox1,six2,pax1,lats1,sox11,osr1,wnt9a,ccm2,ncapg2,meox2,egfr,ctnnb1,eomes,dsc3,prdm14,eya1,mmp16,zfat,zmiz1,ar,amot,epn1,als2,cebpb,snai1,sulf2,tp53,sox6	4.60184
6	0.000121641	GO:0045944	positive regulation of transcription by RNA polymerase II	dmrt2,nr2f1,gdnf,pou2f1,gabpa,mbtps2,lhx1,tfap2e,auts2,klf12,nr4a1,vdr,hoxc13,dcn,tcf12,cebpa,maf,lhx4,nr2c2,prox1,six2,pax1,plscr1,sox11,osr1,naca,csrnp1,en2,nfatc1,ahr,meox2,egfr,inhba,ctnnb1,eomes,thrb,ss18,eya1,zfat,mafa,pitx3,zmiz1,ruvbl2,ar,sertad1,meis2,nhlh1,ikzf2,cebpb,mybl2,tp53,sox6	3.91492
7	0.00021937	GO:0010557	positive regulation of macromolecule biosynthetic process	dmrt2,nr2f1,fbxo4,gdnf,pou2f1,gabpa,mbtps2,lhx1,tfap2e,auts2,dnajc3,klf12,nr4a1,vdr,hoxc13,smarcd1,nox4,dcn,tcf12,cebpa,brd7,maf,lhx4,ptprc,nr2c2,supt7l,rab3gap2,prox1,six2,pax1,tcp1,plscr1,sox11,id2,osr1,naca,csrnp1,en2,nfatc1,ahr,meox2,egfr,inhba,ctnnb1,eomes,thrb,ss18,eya1,mtdh,zfat,mafa,ercc6,pitx3,zmiz1,rere,ruvbl2,ar,sertad1,meis2,thbs1,nhlh1,ikzf2,cebpb,snai1,ube2v1,mybl2,myd88,tp53,epo,so…	3.65882
8	0.000305511	GO:0048568	embryonic organ development	pcsk5,fbn2,gdnf,lhx1,cebpa,irx5,hyal1,prox1,six2,tpo,sox11,id2,osr1,wnt9a,en2,egfr,ctnnb1,eomes,eya1,mmp16,zfat,rnf207,epn1,cebpb,snai1,slc9a3r1,tp53	3.51497
9	0.000451815	GO:0001822	kidney development	spry1,pcsk5,gdnf,serpinf1,lhx1,pdgfd,dcn,irx3,sec61a1,prox1,six2,agtr1,sox11,id2,osr1,acvr2b,adamts16,ctnnb1,eya1,sulf2,upk3a	3.34504
10	0.000474058	GO:1903508	positive regulation of nucleic acid-templated transcription	dmrt2,nr2f1,gdnf,pou2f1,gabpa,mbtps2,lhx1,tfap2e,auts2,klf12,nr4a1,vdr,hoxc13,smarcd1,dcn,tcf12,cebpa,brd7,maf,lhx4,nr2c2,supt7l,prox1,six2,pax1,plscr1,sox11,id2,osr1,naca,csrnp1,en2,nfatc1,ahr,meox2,egfr,inhba,ctnnb1,eomes,thrb,ss18,eya1,mtdh,zfat,mafa,ercc6,pitx3,zmiz1,rere,ruvbl2,ar,sertad1,meis2,nhlh1,ikzf2,cebpb,snai1,ube2v1,mybl2,tp53,epo,sox6	3.32417
11	0.000484495	GO:1902680	positive regulation of RNA biosynthetic process	dmrt2,nr2f1,gdnf,pou2f1,gabpa,mbtps2,lhx1,tfap2e,auts2,klf12,nr4a1,vdr,hoxc13,smarcd1,dcn,tcf12,cebpa,brd7,maf,lhx4,nr2c2,supt7l,prox1,six2,pax1,plscr1,sox11,id2,osr1,naca,csrnp1,en2,nfatc1,ahr,meox2,egfr,inhba,ctnnb1,eomes,thrb,ss18,eya1,mtdh,zfat,mafa,ercc6,pitx3,zmiz1,rere,ruvbl2,ar,sertad1,meis2,nhlh1,ikzf2,cebpb,snai1,ube2v1,mybl2,tp53,epo,sox6	3.31471
12	0.000510462	GO:0048513	animal organ development	wdr1,spry1,grid2,epha5,dmrt3,pcsk5,fancc,fbn2,gdnf,prlr,dscam,gabpa,serpinf1,arx,mbtps2,lhx1,amigo1,shroom2,nr4a1,vdr,hoxc13,pdgfd,nox4,tenm4,ptn,cd9,hspa9,flt4,msx2,dcn,foxb1,tcf12,acan,cebpa,irx3,irx5,gnao1,maf,lhx4,ptbp2,ptprc,grin2b,hyal1,sec61a1,prox1,six2,pax1,lats1,atg5,dock10,agtr1,tpo,sox11,id2,osr1,wnt9a,ccm2,naca,csrnp1,acvr2b,htr5a,en2,ncapg2,svil,nfatc1,adamts16,meox2,egfr,inhba,ctnn…	3.29204
13	0.000539164	GO:0001655	urogenital system development	spry1,pcsk5,gdnf,serpinf1,lhx1,pdgfd,dcn,foxb1,irx3,sec61a1,prox1,six2,agtr1,sox11,id2,osr1,acvr2b,adamts16,ctnnb1,eya1,ar,sulf2,upk3a	3.26828
14	0.000630326	GO:0031328	positive regulation of cellular biosynthetic process	dmrt2,nr2f1,fbxo4,gdnf,pou2f1,gabpa,mbtps2,lhx1,tfap2e,auts2,dnajc3,klf12,htr2a,nr4a1,vdr,hoxc13,smarcd1,nox4,dcn,tcf12,cebpa,brd7,maf,lhx4,ptprc,nr2c2,supt7l,rab3gap2,prox1,six2,pax1,tcp1,plscr1,sox11,id2,osr1,naca,csrnp1,en2,nfatc1,ahr,meox2,egfr,inhba,ctnnb1,eomes,thrb,ss18,eya1,mtdh,zfat,mafa,ercc6,pitx3,zmiz1,rere,ruvbl2,ar,sertad1,meis2,thbs1,nhlh1,ikzf2,cebpb,snai1,ube2v1,mybl2,myd88,tp53,…	3.20043
15	0.000719454	GO:0045935	positive regulation of nucleobase-containing compound metabolic process	dmrt2,nr2f1,fbxo4,gdnf,pou2f1,gabpa,mbtps2,lhx1,tfap2e,auts2,klf12,htr2a,nr4a1,vdr,hoxc13,smarcd1,nox4,dcn,tcf12,cebpa,brd7,maf,lhx4,ptprc,nr2c2,supt7l,prox1,six2,pax1,tcp1,plscr1,sox11,id2,osr1,naca,csrnp1,en2,nfatc1,ahr,meox2,egfr,inhba,ctnnb1,eomes,thrb,ss18,eya1,mtdh,zfat,mafa,ercc6,pitx3,zmiz1,rere,ruvbl2,ar,sertad1,meis2,nhlh1,ikzf2,cebpb,snai1,ube2v1,mybl2,rbm20,tp53,epo,sox6	3.143
16	0.000808523	GO:0045893	positive regulation of transcription, DNA-templated	dmrt2,nr2f1,gdnf,pou2f1,gabpa,mbtps2,lhx1,tfap2e,auts2,klf12,nr4a1,vdr,hoxc13,smarcd1,dcn,tcf12,cebpa,brd7,maf,lhx4,nr2c2,prox1,six2,pax1,plscr1,sox11,id2,osr1,naca,csrnp1,en2,nfatc1,ahr,meox2,egfr,inhba,ctnnb1,eomes,thrb,ss18,eya1,zfat,mafa,ercc6,pitx3,zmiz1,ruvbl2,ar,sertad1,meis2,nhlh1,ikzf2,cebpb,snai1,ube2v1,mybl2,tp53,epo,sox6	3.09231
17	0.000882125	GO:0051239	regulation of multicellular organismal process	wdr1,spry1,grid2,dmrt2,dmrt3,fbn2,nr2f1,gdnf,prlr,gap43,igsf11,dscam,gabpa,serpinf1,ace2,arx,lhx1,amigo1,itpr3,htr2a,vdr,pdgfd,tenm4,p2ry2,chrm2,ptn,cd9,hspa9,flt4,wwc2,msx2,dcn,kcnd2,celf2,tcf12,cebpa,irx3,irx5,gnao1,maf,cth,ptprc,ip6k1,traip,hyal1,prox1,six2,lats1,atg5,tpbg,cnr1,agtr1,trip12,sox11,id2,trib2,osr1,rhob,wnt9a,naca,acvr2b,ncapg2,nfatc1,meox2,egfr,inhba,ctnnb1,thrb,cdh2,prdm14,eya1,…	3.05447
18	0.0011274	GO:0072001	renal system development	spry1,pcsk5,gdnf,serpinf1,lhx1,pdgfd,dcn,irx3,sec61a1,prox1,six2,agtr1,sox11,id2,osr1,acvr2b,adamts16,ctnnb1,eya1,sulf2,upk3a	2.94792
19	0.00114053	GO:0010628	positive regulation of gene expression	dmrt2,erp29,nr2f1,gdnf,pou2f1,gabpa,arx,mbtps2,lhx1,tfap2e,auts2,dnajc3,klf12,nr4a1,vdr,hoxc13,smarcd1,dcn,tcf12,cebpa,brd7,maf,lhx4,nr2c2,prox1,six2,pax1,syncrip,plscr1,sox11,id2,osr1,naca,csrnp1,en2,nfatc1,twistnb,ahr,meox2,egfr,inhba,ctnnb1,eomes,thrb,ss18,eya1,zfat,mafa,ercc6,pitx3,zmiz1,rnf207,ruvbl2,ar,sertad1,meis2,actc1,thbs1,nhlh1,ikzf2,cebpb,snai1,ube2v1,mybl2,olfm1,myd88,rbm38,rbm20,tp…	2.94289
20	0.00118566	GO:0050793	regulation of developmental process	wdr1,spry1,grid2,dmrt2,dmrt3,fbn2,prdm6,nr2f1,gdnf,gap43,dscam,gabpa,serpinf1,arx,lhx1,amigo1,rhoc,htr2a,vdr,pdgfd,tenm4,ptn,hspa9,flt4,wwc2,msx2,dcn,tcf12,cebpa,irx3,maf,cth,ptprc,hyal1,prox1,six2,lats1,tpbg,cnr1,agtr1,trip12,sox11,id2,trib2,osr1,rhob,wnt9a,naca,acvr2b,ncapg2,nfatc1,meox2,egfr,inhba,ctnnb1,thrb,cdh2,prdm14,eya1,mtdh,ywhaz,rspo2,pitx3,zmiz1,rnf207,rapgef1,ar,amot,slitrk2,dact3,nu…	2.92604
21	0.00119583	GO:0051094	positive regulation of developmental process	spry1,grid2,dmrt2,fbn2,gdnf,dscam,serpinf1,arx,lhx1,amigo1,htr2a,vdr,pdgfd,tenm4,ptn,msx2,dcn,tcf12,cebpa,irx3,cth,ptprc,hyal1,prox1,tpbg,cnr1,agtr1,sox11,id2,osr1,rhob,wnt9a,naca,acvr2b,inhba,ctnnb1,cdh2,prdm14,mtdh,pitx3,zmiz1,rapgef1,ar,amot,slitrk2,numb,thbs1,eef2k,socs1,cebpb,snai1,olfm1,cbln2,tp53,epo,sox6	2.92233
22	0.00125281	GO:0009891	positive regulation of biosynthetic process	dmrt2,nr2f1,fbxo4,gdnf,pou2f1,gabpa,mbtps2,lhx1,tfap2e,auts2,dnajc3,klf12,htr2a,nr4a1,vdr,hoxc13,smarcd1,nox4,dcn,tcf12,cebpa,brd7,maf,lhx4,ptprc,nr2c2,supt7l,rab3gap2,prox1,six2,pax1,tcp1,plscr1,sox11,id2,osr1,naca,csrnp1,en2,nfatc1,ahr,meox2,egfr,inhba,ctnnb1,eomes,thrb,ss18,eya1,mtdh,zfat,mafa,ercc6,pitx3,zmiz1,rere,ruvbl2,ar,sertad1,meis2,thbs1,nhlh1,ikzf2,cebpb,snai1,ube2v1,mybl2,myd88,tp53,…	2.90211
23	0.00128313	GO:0001501	skeletal system development	papss1,dmrt2,pcsk5,fbn2,mbtps2,lhx1,vdr,msx2,acan,irx5,maf,ptprc,hyal1,six2,pax1,sox11,osr1,wnt9a,csrnp1,acvr2b,ctnnb1,eya1,mmp16,rspo2,nab1,snai1,sulf2,tp53,sox6	2.89173
24	0.00134051	GO:0051254	positive regulation of RNA metabolic process	dmrt2,nr2f1,gdnf,pou2f1,gabpa,mbtps2,lhx1,tfap2e,auts2,klf12,nr4a1,vdr,hoxc13,smarcd1,dcn,tcf12,cebpa,brd7,maf,lhx4,nr2c2,supt7l,prox1,six2,pax1,plscr1,sox11,id2,osr1,naca,csrnp1,en2,nfatc1,ahr,meox2,egfr,inhba,ctnnb1,eomes,thrb,ss18,eya1,mtdh,zfat,mafa,ercc6,pitx3,zmiz1,rere,ruvbl2,ar,sertad1,meis2,nhlh1,ikzf2,cebpb,snai1,ube2v1,mybl2,rbm20,tp53,epo,sox6	2.87273
25	0.00149062	GO:0009888	tissue development	wdr1,spry1,dmrt2,fbn2,gdnf,gap43,arx,lhx1,rhoc,nr4a1,vdr,hoxc13,pdgfd,nox4,tenm4,ptn,cd9,msx2,dcn,foxb1,acan,irx3,maf,ptprc,hyal1,prox1,six2,pax1,lats1,atg5,sox11,id2,osr1,rhob,wnt9a,ccm2,naca,acvr2b,svil,adamts16,meox2,egfr,inhba,ctnnb1,atp2c1,eomes,thrb,cdh2,dsc3,eya1,rspo2,zfat,atrnl1,pitx3,rnf207,rapgef1,ar,dact3,actc1,nab1,gaa,cebpb,snai1,sulf2,slc9a3r1,evpl,olfm1,ninj1,myd88,tp53,upk3a,sox6…	2.82663
26	0.00165273	GO:2000026	regulation of multicellular organismal development	wdr1,spry1,grid2,dmrt2,dmrt3,fbn2,nr2f1,gdnf,gap43,dscam,gabpa,serpinf1,lhx1,amigo1,vdr,pdgfd,tenm4,ptn,hspa9,msx2,dcn,tcf12,irx3,maf,cth,ptprc,hyal1,prox1,six2,tpbg,cnr1,agtr1,trip12,sox11,id2,osr1,rhob,wnt9a,naca,acvr2b,ncapg2,nfatc1,meox2,egfr,inhba,ctnnb1,thrb,cdh2,eya1,mtdh,ywhaz,rspo2,pitx3,zmiz1,rnf207,rapgef1,ar,amot,slitrk2,dact3,numb,meis2,thbs1,epn1,eef2k,socs1,cebpb,snai1,sulf2,olfm1,…	2.7818
27	0.00171527	GO:0071407	cellular response to organic cyclic compound	nsg1,epha5,nr2f1,htr1a,epg5,gabpa,serpinf1,htr2a,nr4a1,vdr,nox4,p2ry2,chrm2,ptn,msx2,cebpa,gnao1,nr2c2,akap7,lats1,htr5a,ahr,egfr,inhba,ctnnb1,thrb,ruvbl2,rapgef1,ar,eef2k,cebpb,slc9a3r1	2.76567
28	0.00203155	GO:0040019	positive regulation of embryonic development	dmrt2,gdnf,lhx1,tenm4,osr1,ctnnb1,ar,amot	2.69217
29	0.00272318	GO:0048706	embryonic skeletal system development	dmrt2,pcsk5,lhx1,irx5,hyal1,six2,sox11,osr1,wnt9a,ctnnb1,eya1,mmp16,sulf2	2.56492
30	0.00380866	GO:0003013	circulatory system process	pcsk5,htr1a,ace2,f5,itpr3,htr2a,nox4,p2ry2,chrm2,kcnd2,celf2,irx5,gnao1,atg5,cnr1,agtr1,id2,adamts16,meox2,egfr,thrb,ncald,rnls,rnf207,ar,actc1,gaa,nav2,epo	2.41923
31	0.00406662	GO:0010604	positive regulation of macromolecule metabolic process	nsg1,dmrt2,chfr,erp29,nr2f1,fbxo4,gdnf,prlr,pou2f1,gabpa,arx,mbtps2,lhx1,tfap2e,auts2,dnajc3,klf12,htr2a,nr4a1,vdr,hoxc13,smarcd1,pdgfd,nox4,flt4,dcn,tcf12,pde8a,arrdc4,cebpa,brd7,maf,lhx4,ptprc,grin2b,nr2c2,supt7l,rab3gap2,prox1,six2,pax1,tcp1,lats1,syncrip,plscr1,agtr1,sox11,rnf144a,id2,trib2,osr1,naca,csrnp1,acvr2b,en2,ncapg2,nfatc1,cycs,twistnb,ahr,meox2,egfr,inhba,ctnnb1,eomes,thrb,ss18,cdh2…	2.39077
32	0.004079	GO:1901700	response to oxygen-containing compound	nsg1,glra3,epha5,gnaq,fancc,ercc6l2,htr1a,prlr,gabpa,serpinf1,amigo1,htr2a,nr4a1,vdr,smarcd1,pdgfd,nox4,p2ry2,chrm2,ptn,cd9,msx2,dcn,pde8a,gnao1,grin2b,hyal1,akap7,cnr1,agtr1,vsnl1,osr1,rhob,wnt9a,acvr2b,htr5a,ahr,egfr,inhba,ctnnb1,mtdh,mafa,rnls,dntt,ercc6,pitx3,ruvbl2,rapgef1,ar,actc1,thbs1,eef2k,socs1,grb14,hnmt,cebpb,slc9a3r1,glp2r,myd88,tp53,atp6v1e1,epo	2.38945
33	0.00424117	GO:0007423	sensory organ development	fbn2,dscam,serpinf1,lhx1,shroom2,hoxc13,ptn,cebpa,irx5,maf,prox1,six2,atg5,sox11,osr1,wnt9a,ccm2,acvr2b,egfr,inhba,ctnnb1,thrb,eya1,atoh7,pitx3,meis2,pvalb,slc9a3r1,ninj1	2.37251
34	0.00461072	GO:0048731	system development	wdr1,spry1,papss1,grid2,epha5,dmrt2,dmrt3,pcsk5,fancc,fbn2,prdm6,nr2f1,gdnf,prlr,gap43,dscam,gabpa,serpinf1,arx,mbtps2,lhx1,amigo1,shroom2,auts2,nr4a1,vdr,hoxc13,smarcd1,pdgfd,nox4,tenm4,chrm2,ptn,cd9,hspa9,flt4,msx2,dcn,foxb1,tcf12,acan,cebpa,irx3,irx5,gnao1,maf,cth,lhx4,ptbp2,ptprc,grin2b,hyal1,nr2c2,sec61a1,prox1,six2,pax1,lats1,atg5,tpbg,cnr1,dock10,agtr1,tpo,sox11,id2,osr1,rhob,wnt9a,ccm2,na…	2.33623
35	0.00574084	GO:0071495	cellular response to endogenous stimulus	nsg1,rasl11b,spry1,polr2b,epha5,gnaq,fbn2,nr2f1,htr1a,prlr,gabpa,serpinf1,lhx1,amigo1,htr2a,nr4a1,vdr,pdgfd,nox4,p2ry2,chrm2,ptn,msx2,pde8a,gnao1,hyal1,nr2c2,akap7,lats1,agtr1,sox11,acvr2b,htr5a,ahr,egfr,inhba,ctnnb1,thrb,prdm14,pitx3,ruvbl2,rapgef1,ar,thbs1,eef2k,socs1,grb14,cebpb,sulf2,slc9a3r1,dkk3,glp2r,tp53,atp6v1e1,sox6	2.24102
36	0.00824861	GO:0008015	blood circulation	pcsk5,htr1a,ace2,f5,itpr3,htr2a,p2ry2,chrm2,kcnd2,celf2,irx5,gnao1,atg5,cnr1,agtr1,id2,adamts16,meox2,egfr,thrb,ncald,rnls,rnf207,ar,actc1,gaa,nav2,epo	2.08362
37	0.0136496	GO:0048705	skeletal system morphogenesis	fbn2,lhx1,msx2,acan,irx5,hyal1,six2,pax1,sox11,osr1,wnt9a,csrnp1,acvr2b,ctnnb1,eya1,mmp16,nab1	1.86488
38	0.0139591	GO:0007507	heart development	spry1,pcsk5,nox4,tenm4,ptn,msx2,acan,prox1,atg5,sox11,id2,osr1,ccm2,naca,acvr2b,nfatc1,egfr,ctnnb1,eomes,eya1,zmiz1,rnf207,actc1,gaa,snai1,olfm1,rbm20,tp53,sox6	1.85514
39	0.0153797	GO:0048598	embryonic morphogenesis	fbn2,gdnf,lhx1,tenm4,msx2,irx3,irx5,hyal1,prox1,six2,lats1,sox11,id2,osr1,wnt9a,acvr2b,lmbr1,inhba,ctnnb1,eomes,eya1,mmp16,rspo2,rnf207,ar,amot,snai1,slc9a3r1,tp53	1.81305
40	0.0164278	GO:0051240	positive regulation of multicellular organismal process	spry1,grid2,dmrt2,fbn2,gdnf,prlr,igsf11,dscam,serpinf1,ace2,arx,lhx1,amigo1,htr2a,vdr,pdgfd,tenm4,p2ry2,ptn,flt4,msx2,tcf12,cebpa,irx3,cth,ptprc,hyal1,prox1,atg5,tpbg,cnr1,agtr1,sox11,id2,osr1,rhob,naca,acvr2b,egfr,inhba,ctnnb1,prdm14,mtdh,pitx3,zmiz1,rnf207,rapgef1,ar,amot,slitrk2,numb,thbs1,sec14l1,eef2k,socs1,cebpb,snai1,sulf2,olfm1,cbln2,myd88,epo,sox6	1.78442
41	0.0168723	GO:0072359	circulatory system development	spry1,pcsk5,serpinf1,nr4a1,pdgfd,nox4,tenm4,ptn,flt4,msx2,dcn,acan,cth,hyal1,prox1,atg5,agtr1,sox11,id2,osr1,rhob,ccm2,naca,acvr2b,nfatc1,ahr,meox2,egfr,ctnnb1,eomes,cdh2,eya1,mtdh,zmiz1,rnf207,rapgef1,amot,actc1,thbs1,epn1,gaa,snai1,olfm1,rbm20,tp53,sox6	1.77283
42	0.0242185	GO:0031325	positive regulation of cellular metabolic process	nsg1,dmrt2,chfr,erp29,nr2f1,fbxo4,gdnf,prlr,pou2f1,dscam,gabpa,ace2,mbtps2,lhx1,tfap2e,auts2,dnajc3,klf12,htr2a,nr4a1,vdr,hoxc13,smarcd1,pdgfd,nox4,flt4,dcn,tcf12,pde8a,arrdc4,cebpa,brd7,maf,lhx4,ptprc,grin2b,nr2c2,supt7l,rab3gap2,prox1,six2,pax1,tcp1,lats1,atg5,plscr1,agtr1,sox11,rnf144a,id2,trib2,osr1,naca,csrnp1,acvr2b,en2,ncapg2,nfatc1,cycs,ahr,meox2,egfr,inhba,ctnnb1,eomes,thrb,ss18,cdh2,eya…	1.61585
43	0.0246333	GO:0009719	response to endogenous stimulus	nsg1,rasl11b,spry1,polr2b,epha5,gnaq,fbn2,nr2f1,htr1a,prlr,gabpa,serpinf1,lhx1,amigo1,htr2a,nr4a1,vdr,pdgfd,nox4,p2ry2,chrm2,ptn,timp3,cd9,msx2,pde8a,gnao1,hyal1,nr2c2,akap7,lats1,agtr1,sox11,acvr2b,htr5a,ahr,egfr,inhba,ctnnb1,thrb,prdm14,pitx3,ruvbl2,rapgef1,ar,thbs1,eef2k,socs1,grb14,hnmt,cebpb,sulf2,slc9a3r1,dkk3,glp2r,myd88,tp53,atp6v1e1,epo,sox6	1.60848
44	0.0254171	GO:0061351	neural precursor cell proliferation	arx,lhx1,ptn,ptbp2,prox1,id2,ctnnb1,cdh2,pitx3,rere,rapgef1,numb,tp53	1.59487
45	0.0264563	GO:2000177	regulation of neural precursor cell proliferation	lhx1,ptn,ptbp2,prox1,id2,ctnnb1,cdh2,pitx3,rapgef1,tp53	1.57747
46	0.0272052	GO:0009893	positive regulation of metabolic process	nsg1,dmrt2,chfr,erp29,nr2f1,fbxo4,gdnf,prlr,pou2f1,dscam,gabpa,ace2,arx,mbtps2,lhx1,tfap2e,auts2,dnajc3,klf12,htr2a,nr4a1,vdr,hoxc13,smarcd1,pdgfd,nox4,flt4,dcn,tcf12,pde8a,arrdc4,cebpa,brd7,maf,lhx4,ptprc,grin2b,nr2c2,supt7l,rab3gap2,prox1,six2,pax1,tcp1,lats1,atg5,syncrip,plscr1,agtr1,sox11,rnf144a,id2,trib2,osr1,naca,csrnp1,acvr2b,en2,ncapg2,nfatc1,cycs,twistnb,ahr,meox2,egfr,inhba,ctnnb1,eome…	1.56535
47	0.0298567	GO:0010033	response to organic substance	nsg1,s100p,dhx15,rasl11b,glra3,spry1,polr2b,sppl2b,epha5,gnaq,fbn2,nr2f1,htr1a,prlr,epg5,pou2f1,gabpa,serpinf1,mbtps2,lhx1,amigo1,dnajc3,htr2a,nr4a1,vdr,smarcd1,pdgfd,nox4,p2ry2,chrm2,ptn,timp3,cd9,hspa9,flt4,msx2,dcn,pde8a,cebpa,gnao1,cth,ptprc,grin2b,traip,hyal1,nr2c2,sec61a1,akap7,tcp1,lats1,cnr1,syncrip,plscr1,agtr1,pxdn,sox11,vsnl1,osr1,wnt9a,acvr2b,htr5a,twistnb,ahr,egfr,inhba,ctnnb1,thrb,p…	1.52496
48	0.030748	GO:0007275	multicellular organism development	wdr1,spry1,papss1,grid2,epha5,dmrt2,dmrt3,pcsk5,fancc,fbn2,prdm6,nr2f1,gdnf,prlr,gap43,dscam,gabpa,serpinf1,arx,mbtps2,lhx1,morc1,amigo1,shroom2,auts2,dach1,nr4a1,vdr,hoxc13,smarcd1,pdgfd,nox4,tenm4,chrm2,ptn,cd9,hspa9,flt4,msx2,dcn,foxb1,tcf12,acan,gmcl1,cebpa,irx3,irx5,gnao1,maf,cth,lhx4,ptbp2,ptprc,grin2b,hyal1,nr2c2,sec61a1,prox1,six2,pax1,lats1,atg5,tpbg,cnr1,dock10,agtr1,trip12,tpo,sox11,id…	1.51218
49	0.0321206	GO:0048704	embryonic skeletal system morphogenesis	lhx1,irx5,hyal1,six2,sox11,osr1,wnt9a,ctnnb1,eya1,mmp16	1.49322
50	0.0333581	GO:1901701	cellular response to oxygen-containing compound	nsg1,epha5,gnaq,fancc,ercc6l2,htr1a,prlr,gabpa,serpinf1,amigo1,htr2a,nr4a1,vdr,smarcd1,pdgfd,nox4,p2ry2,chrm2,ptn,msx2,pde8a,gnao1,akap7,agtr1,vsnl1,osr1,rhob,wnt9a,htr5a,ahr,egfr,inhba,ctnnb1,mtdh,ruvbl2,rapgef1,ar,eef2k,socs1,grb14,cebpb,slc9a3r1,glp2r,myd88,tp53,atp6v1e1	1.4768
51	0.0342034	GO:0048593	camera-type eye morphogenesis	dscam,lhx1,shroom2,ptn,irx5,prox1,sox11,wnt9a,ctnnb1,thrb,pitx3	1.46593
52	0.0350158	GO:0051173	positive regulation of nitrogen compound metabolic process	dmrt2,chfr,erp29,nr2f1,fbxo4,gdnf,prlr,pou2f1,gabpa,mbtps2,lhx1,tfap2e,auts2,dnajc3,klf12,htr2a,nr4a1,vdr,hoxc13,smarcd1,pdgfd,nox4,flt4,dcn,tcf12,pde8a,arrdc4,cebpa,brd7,maf,lhx4,ptprc,grin2b,nr2c2,supt7l,rab3gap2,prox1,six2,pax1,tcp1,lats1,plscr1,agtr1,sox11,rnf144a,id2,trib2,osr1,naca,csrnp1,acvr2b,en2,ncapg2,nfatc1,cycs,ahr,meox2,egfr,inhba,ctnnb1,eomes,thrb,ss18,cdh2,eya1,mtdh,zfat,rplp1,maf…	1.45574
53	0.0365491	GO:0071310	cellular response to organic substance	nsg1,rasl11b,spry1,polr2b,sppl2b,epha5,gnaq,fbn2,nr2f1,htr1a,prlr,epg5,pou2f1,gabpa,serpinf1,mbtps2,lhx1,amigo1,dnajc3,htr2a,nr4a1,vdr,smarcd1,pdgfd,nox4,p2ry2,chrm2,ptn,timp3,hspa9,flt4,msx2,dcn,pde8a,cebpa,gnao1,cth,ptprc,traip,hyal1,nr2c2,akap7,tcp1,lats1,syncrip,agtr1,pxdn,sox11,vsnl1,osr1,wnt9a,acvr2b,htr5a,twistnb,ahr,egfr,inhba,ctnnb1,thrb,prdm14,mtdh,ywhaz,pitx3,ruvbl2,rapgef1,ar,thbs1,ee…	1.43712
54	0.0369041	GO:0090596	sensory organ morphogenesis	fbn2,dscam,lhx1,shroom2,hoxc13,ptn,irx5,prox1,six2,sox11,osr1,wnt9a,ctnnb1,thrb,eya1,pitx3,slc9a3r1	1.43293
55	0.0423599	GO:0043010	camera-type eye development	fbn2,dscam,serpinf1,lhx1,shroom2,ptn,irx5,maf,prox1,sox11,wnt9a,acvr2b,egfr,inhba,ctnnb1,thrb,atoh7,pitx3,ninj1	1.37304
56	0.0429135	GO:0048646	anatomical structure formation involved in morphogenesis	wdr1,spry1,grid2,dmrt2,fbn2,gdnf,dscam,gabpa,serpinf1,lhx1,nr4a1,tenm4,ptn,cd9,flt4,msx2,dcn,foxb1,irx3,hyal1,prox1,six2,pax1,lats1,agtr1,sox11,osr1,rhob,acvr2b,meox2,inhba,ctnnb1,eomes,prdm14,eya1,mtdh,sh3pxd2a,ar,amot,actc1,thbs1,epn1,snai1,olfm1,tp53	1.36741
57	0.044225	GO:0048522	positive regulation of cellular process	wdr1,nsg1,alpk1,grid2,slc24a2,dmrt2,chfr,erp29,fbn2,nr2f1,htr1a,fbxo4,gdnf,prlr,pou2f1,igsf11,dscam,gabpa,serpinf1,ace2,mbtps2,lhx1,tfap2e,amigo1,srpx,dynlt3,rhoc,itpr3,auts2,dnajc3,klf12,htr2a,nr4a1,vdr,hoxc13,smarcd1,pdgfd,nox4,tenm4,ptn,timp3,flt4,msx2,dcn,tcf12,pde8a,arrdc4,cebpa,irx3,brd7,maf,cth,lhx4,ptprc,grin2b,baiap2l2,hyal1,nr2c2,cadps,supt7l,rab3gap2,prox1,six2,pax1,usp34,dstn,tcp1,lat…	1.35433
58	0.0471525	GO:0045165	cell fate commitment	dmrt3,gap43,arx,tenm4,prox1,six2,lats1,id2,wnt9a,ctnnb1,eomes,prdm14,eya1,ar,cebpb,tp53,sox6	1.32649
59	0.0488224	GO:0003002	regionalization	spry1,dmrt2,dmrt3,pcsk5,gdnf,lhx1,hoxc13,msx2,foxb1,irx3,six2,pax1,osr1,acvr2b,meox2,ctnnb1,eomes,ar,snai1,tp53	1.31138
60	0.0495117	GO:0032502	developmental process	wdr1,spry1,papss1,grid2,polr2b,epha5,dmrt2,dmrt3,pcsk5,fancc,fbn2,prdm6,nr2f1,fbxo4,gdnf,prlr,gap43,dscam,gabpa,serpinf1,arx,mbtps2,lhx1,morc1,amigo1,shroom2,rhoc,auts2,dach1,htr2a,nr4a1,vdr,hoxc13,smarcd1,pdgfd,nox4,tenm4,chrm2,ptn,cd9,hspa9,flt4,wwc2,msx2,dcn,foxb1,tcf12,acan,gmcl1,cebpa,irx3,irx5,gnao1,maf,cth,lhx4,ptbp2,ptprc,grin2b,hyal1,nr2c2,sec61a1,prox1,six2,pax1,lats1,atg5,tpbg,cnr1,syn…	1.30529

## Sheet: Supp Table 1h
6hpa ReviGO results
term_ID	description	frequencyInDb	log10pvalue	uniqueness	dispensability	representative
GO:0032502	developmental process	0.3398	-3.8125	0.986	0	developmental process
GO:0048522	positive regulation of cellular process	0.2773	-6.1891	0.759	0	positive regulation of cellular process
GO:0050789	regulation of biological process	0.6346	-2.0835	0.887	0.17	positive regulation of cellular process
GO:0048523	negative regulation of cellular process	0.2495	-4.3045	0.87	0.149	positive regulation of cellular process
GO:0048519	negative regulation of biological process	0.2686	-3.9586	0.888	0.128	positive regulation of cellular process
GO:0048518	positive regulation of biological process	0.3097	-5.2197	0.884	0.135	positive regulation of cellular process
GO:0023051	regulation of signaling	0.1795	-3.2248	0.891	0.111	positive regulation of cellular process
GO:0080090	regulation of primary metabolic process	0.3357	-2.7645	0.723	0.147	positive regulation of cellular process
GO:0051240	positive regulation of multicellular organismal process	0.0833	-2.7852	0.663	0.429	positive regulation of cellular process
GO:0009966	regulation of signal transduction	0.1592	-1.5045	0.864	0.358	positive regulation of cellular process
GO:0010646	regulation of cell communication	0.1765	-3.1599	0.881	0.132	positive regulation of cellular process
GO:0045934	negative regulation of nucleobase-containing compound metabolic process	0.0781	-1.3536	0.719	0.488	positive regulation of cellular process
GO:0045935	positive regulation of nucleobase-containing compound metabolic process	0.0976	-5.7645	0.619	0.448	positive regulation of cellular process
GO:0032879	regulation of localization	0.1441	-2.1707	0.901	0.103	positive regulation of cellular process
GO:0019222	regulation of metabolic process	0.3573	-1.475	0.867	0.177	positive regulation of cellular process
GO:0065007	biological regulation	0.6707	-1.7399	0.993	0	biological regulation
GO:0071840	cellular component organization or biogenesis	0.3653	-4.6655	0.986	0	cellular component organization or biogenesis
GO:0072078	nephron tubule morphogenesis	0.0042	-1.475	0.679	0	nephron tubule morphogenesis
GO:0050793	regulation of developmental process	0.1295	-3.9508	0.657	0.355	nephron tubule morphogenesis
GO:0031175	neuron projection development	0.0488	-5.2299	0.56	0.238	nephron tubule morphogenesis
GO:0007399	nervous system development	0.1277	-7.0182	0.648	0.398	nephron tubule morphogenesis
GO:0009888	tissue development	0.1091	-4.1599	0.701	0.377	nephron tubule morphogenesis
GO:0060322	head development	0.0409	-3.1931	0.74	0.254	nephron tubule morphogenesis
GO:0016043	cellular component organization	0.3568	-4.6478	0.916	0.316	nephron tubule morphogenesis
GO:0051239	regulation of multicellular organismal process	0.1527	-3.6968	0.785	0.142	nephron tubule morphogenesis
GO:0043009	chordate embryonic development	0.0326	-2.6198	0.708	0.273	nephron tubule morphogenesis
GO:0030154	cell differentiation	0.221	-3.8508	0.616	0.498	nephron tubule morphogenesis
GO:0030030	cell projection organization	0.0796	-2.9586	0.901	0.359	nephron tubule morphogenesis
GO:0009653	anatomical structure morphogenesis	0.1387	-5.7595	0.689	0.316	nephron tubule morphogenesis
GO:0009790	embryo development	0.0551	-2.6216	0.707	0.324	nephron tubule morphogenesis
GO:0045597	positive regulation of cell differentiation	0.0489	-1.7825	0.533	0.39	nephron tubule morphogenesis
GO:0048869	cellular developmental process	0.2309	-4.9469	0.672	0.414	nephron tubule morphogenesis
GO:0032990	cell part morphogenesis	0.0357	-4.3487	0.624	0.387	nephron tubule morphogenesis
GO:0019438	aromatic compound biosynthetic process	0.2579	-1.7905	0.776	0.007	aromatic compound biosynthesis
GO:1901362	organic cyclic compound biosynthetic process	0.2655	-1.4815	0.784	0.469	aromatic compound biosynthesis

## Sheet: Supp Table 1i
24hpa ReviGO results
term_ID	description	frequencyInDb	log10pvalue	uniqueness	dispensability	representative
GO:0048666	neuron development	0.0571	-1.4385	0.593	0	neuron development
GO:0001503	ossification	0.0215	-1.3137	0.781	0.203	neuron development
GO:0045778	positive regulation of ossification	0.0047	-3.1425	0.528	0.165	neuron development
GO:0003002	regionalization	0.0192	-1.3221	0.704	0.259	neuron development
GO:0048645	animal organ formation	0.0035	-2.0788	0.659	0.237	neuron development
GO:0007399	nervous system development	0.1277	-1.3886	0.641	0.41	neuron development
GO:0045935	positive regulation of nucleobase-containing compound metabolic process	0.0976	-1.9425	0.614	0.211	neuron development
GO:0070167	regulation of biomineral tissue development	0.0043	-2.1494	0.601	0.295	neuron development
GO:0048729	tissue morphogenesis	0.0357	-1.5309	0.613	0.45	neuron development
GO:0071495	cellular response to endogenous stimulus	0.0714	-2.3269	0.895	0	cellular response to endogenous stimulus
GO:0071310	cellular response to organic substance	0.1298	-2.0194	0.838	0.153	cellular response to endogenous stimulus

## Sheet: Supp Table 1j
72hpa ReviGO results
term_ID	description	frequencyInDb	log10pvalue	uniqueness	dispensability	representative
GO:0010557	positive regulation of macromolecule biosynthetic process	0.0941	-3.6596	0.649	0	positive regulation of macromolecule biosynthesis
GO:0009893	positive regulation of metabolic process	0.1772	-1.5654	0.752	0.395	positive regulation of macromolecule biosynthesis
GO:0051094	positive regulation of developmental process	0.0682	-2.9208	0.576	0.32	positive regulation of macromolecule biosynthesis
GO:0051240	positive regulation of multicellular organismal process	0.0833	-1.7852	0.594	0.334	positive regulation of macromolecule biosynthesis
GO:0032502	developmental process	0.3398	-1.3054	0.978	0	developmental process
GO:0043009	chordate embryonic development	0.0326	-4.9666	0.621	0	chordate embryonic development
GO:0050793	regulation of developmental process	0.1295	-2.9245	0.679	0.355	chordate embryonic development
GO:0003013	circulatory system process	0.0285	-2.4191	0.819	0.15	chordate embryonic development
GO:0007507	heart development	0.0289	-1.8539	0.673	0.386	chordate embryonic development
GO:0045165	cell fate commitment	0.014	-1.3261	0.781	0.189	chordate embryonic development
GO:0001501	skeletal system development	0.0281	-2.8928	0.698	0.267	chordate embryonic development
GO:0003002	regionalization	0.0192	-1.3116	0.725	0.239	chordate embryonic development
GO:0048513	animal organ development	0.1872	-3.2924	0.61	0.432	chordate embryonic development
GO:0009888	tissue development	0.1091	-2.8268	0.704	0.377	chordate embryonic development
GO:0009887	animal organ morphogenesis	0.0567	-5.8356	0.62	0.467	chordate embryonic development
GO:0072359	circulatory system development	0.0536	-1.7721	0.673	0.439	chordate embryonic development
GO:0001822	kidney development	0.0154	-3.3449	0.676	0.232	chordate embryonic development
GO:0051239	regulation of multicellular organismal process	0.1527	-3.0545	0.75	0.197	chordate embryonic development
GO:0048705	skeletal system morphogenesis	0.012	-1.8665	0.645	0.317	chordate embryonic development
GO:0007423	sensory organ development	0.0297	-2.3726	0.672	0.354	chordate embryonic development
GO:0009653	anatomical structure morphogenesis	0.1387	-6.4685	0.693	0.292	chordate embryonic development
GO:0009790	embryo development	0.0551	-5.983	0.688	0.324	chordate embryonic development
GO:0001655	urogenital system development	0.0182	-3.2684	0.712	0.247	chordate embryonic development
GO:0071407	cellular response to organic cyclic compound	0.031	-2.7645	0.898	0	cellular response to organic cyclic compound
GO:1901701	cellular response to oxygen-containing compound	0.0563	-1.4763	0.893	0.492	cellular response to organic cyclic compound
GO:1901700	response to oxygen-containing compound	0.0868	-2.3893	0.902	0.367	cellular response to organic cyclic compound
GO:0009719	response to endogenous stimulus	0.0918	-1.6091	0.94	0.143	cellular response to organic cyclic compound
GO:0071495	cellular response to endogenous stimulus	0.0714	-2.2411	0.941	0.117	cellular response to organic cyclic compound
GO:0061351	neural precursor cell proliferation	0.0076	-1.5952	0.943	0.013	neural precursor cell proliferation
GO:2000177	regulation of neural precursor cell proliferation	0.0043	-1.5768	0.913	0.374	neural precursor cell proliferation

[truncated: 1 more sheets: KRT]
